# Supplementary material for: Impact of Postharvest Handling on Preharvest Latent Infections Caused by Monilinia spp. in Nectarines
Source: J Fungi (Basel). 2020 Nov 4;6(4):266. doi: 10.3390/jof6040266 (PMC7711865; doi:10.3390/jof6040266)
Supplement: Supplementary file 1 [file jof-06-00266-s001.xlsx]

## Sheet: Experiment 1
Experiment	Treatment	pre cooling	Water dumping	cold-storage chamber	RH%	cold days	incubation days<200DD	DD	incubation days	%IL		Experiment	Treatment	RH%	AULIC
1	C	0	0	0	75	0	8	0	0	0		1	1	75	691.73	287.612
1	C	0	0	0	75	0	8	0	0	0		1	1	75	225.045
1	C	0	0	0	75	0	8	0	0	0		1	1	75	300.19
1	C	0	0	0	100	0	8	0	0	0		1	1	100	0
1	C	0	0	0	100	0	8	0	0	0		1	1	100	500.37
1	C	0	0	0	100	0	8	0	0	0		1	1	100	8.335
1	C	0	0	0	75	0	8	25	1	0		1	2	75	191.705	240.372
1	C	0	0	0	75	0	8	25	1	0		1	2	75	500.37
1	C	0	0	0	75	0	8	25	1	0		1	2	75	283.4
1	C	0	0	0	100	0	8	25	1	0		1	2	100	241.71
1	C	0	0	0	100	0	8	25	1	0		1	2	100	0
1	C	0	0	0	100	0	8	25	1	0		1	2	100	225.045
1	C	0	0	0	75	0	8	50	2	0		1	3	75	0	126.416
1	C	0	0	0	75	0	8	50	2	0		1	3	75	175.035
1	C	0	0	0	75	0	8	50	2	0		1	3	75	0
1	C	0	0	0	100	0	8	50	2	0		1	3	100	175.035
1	C	0	0	0	100	0	8	50	2	0		1	3	100	183.38
1	C	0	0	0	100	0	8	50	2	0		1	3	100	225.045
1	C	0	0	0	75	0	8	75	3	0		1	7	75	75.015	79.2042
1	C	0	0	0	75	0	8	75	3	0		1	7	75	0
1	C	0	0	0	75	0	8	75	3	0		1	7	75	75.015
1	C	0	0	0	100	0	8	75	3	0		1	7	100	216.84
1	C	0	0	0	100	0	8	75	3	0		1	7	100	0
1	C	0	0	0	100	0	8	75	3	0		1	7	100	108.355
1	C	0	0	0	75	0	8	100	4	16.67		1	5	75	158.365	105.577
1	C	0	0	0	75	0	8	100	4	0		1	5	75	158.365
1	C	0	0	0	75	0	8	100	4	0		1	5	75	0
1	C	0	0	0	100	0	8	100	4	0		1	5	100	0
1	C	0	0	0	100	0	8	100	4	16.67		1	5	100	158.365
1	C	0	0	0	100	0	8	100	4	0		1	5	100	158.365
1	C	0	0	0	75	0	8	125	5	16.67		1	8	75	91.685	122.228
1	C	0	0	0	75	0	8	125	5	0		1	8	75	0
1	C	0	0	0	75	0	8	125	5	0		1	8	75	0
1	C	0	0	0	100	0	8	125	5	0		1	8	100	366.685
1	C	0	0	0	100	0	8	125	5	16.67		1	8	100	275
1	C	0	0	0	100	0	8	125	5	0		1	8	100	0
1	C	0	0	0	75	0	8	150	6	16.67		1	4	75	0	58.345
1	C	0	0	0	75	0	8	150	6	0		1	4	75	0
1	C	0	0	0	75	0	8	150	6	0		1	4	75	0
1	C	0	0	0	100	0	8	150	6	0		1	4	100	175.035
1	C	0	0	0	100	0	8	150	6	16.67		1	4	100	0
1	C	0	0	0	100	0	8	150	6	0		1	4	100	175.035
1	C	0	0	0	75	0	8	175	7	33.36		1	6	75	0	31.9508
1	C	0	0	0	75	0	8	175	7	16.67		1	6	75	0
1	C	0	0	0	75	0	8	175	7	0		1	6	75	8.335
1	C	0	0	0	100	0	8	175	7	0		1	6	100	8.335
1	C	0	0	0	100	0	8	175	7	33.36		1	6	100	175.035
1	C	0	0	0	100	0	8	175	7	0		1	6	100	0
1	C	0	0	0	75	0	8	200	8	33.36		1	9	75	50	13.8933
1	C	0	0	0	75	0	8	200	8	16.67		1	9	75	16.68
1	C	0	0	0	75	0	8	200	8	0		1	9	75	16.68
1	C	0	0	0	100	0	8	200	8	0		1	9	100	0
1	C	0	0	0	100	0	8	200	8	33.36		1	9	100	0
1	C	0	0	0	100	0	8	200	8	0		1	9	100	0
1	C	0	0	0	75	0	8	225	9	50
1	C	0	0	0	75	0	8	225	9	16.67
1	C	0	0	0	75	0	8	225	9	16.67
1	C	0	0	0	100	0	8	225	9	0
1	C	0	0	0	100	0	8	225	9	33.36
1	C	0	0	0	100	0	8	225	9	0
1	C	0	0	0	75	0	8	250	10	50
1	C	0	0	0	75	0	8	250	10	16.67
1	C	0	0	0	75	0	8	250	10	16.67
1	C	0	0	0	100	0	8	250	10	0
1	C	0	0	0	100	0	8	250	10	33.36
1	C	0	0	0	100	0	8	250	10	0
1	C	0	0	0	75	0	8	275	11	50
1	C	0	0	0	75	0	8	275	11	16.67
1	C	0	0	0	75	0	8	275	11	16.67
1	C	0	0	0	100	0	8	275	11	0
1	C	0	0	0	100	0	8	275	11	33.36
1	C	0	0	0	100	0	8	275	11	0
1	C	0	0	0	75	0	8	300	12	50
1	C	0	0	0	75	0	8	300	12	16.67
1	C	0	0	0	75	0	8	300	12	16.67
1	C	0	0	0	100	0	8	300	12	0
1	C	0	0	0	100	0	8	300	12	33.36
1	C	0	0	0	100	0	8	300	12	0
1	C	0	0	0	75	0	8	325	13	50
1	C	0	0	0	75	0	8	325	13	16.67
1	C	0	0	0	75	0	8	325	13	16.67
1	C	0	0	0	100	0	8	325	13	0
1	C	0	0	0	100	0	8	325	13	33.36
1	C	0	0	0	100	0	8	325	13	0
1	C	0	0	0	75	0	8	350	14	50
1	C	0	0	0	75	0	8	350	14	16.67
1	C	0	0	0	75	0	8	350	14	33.36
1	C	0	0	0	100	0	8	350	14	0
1	C	0	0	0	100	0	8	350	14	33.36
1	C	0	0	0	100	0	8	350	14	0
1	C	0	0	0	75	0	8	375	15	50
1	C	0	0	0	75	0	8	375	15	16.67
1	C	0	0	0	75	0	8	375	15	33.36
1	C	0	0	0	100	0	8	375	15	0
1	C	0	0	0	100	0	8	375	15	33.36
1	C	0	0	0	100	0	8	375	15	0
1	C	0	0	0	75	0	8	400	16	50
1	C	0	0	0	75	0	8	400	16	16.67
1	C	0	0	0	75	0	8	400	16	33.36
1	C	0	0	0	100	0	8	400	16	0
1	C	0	0	0	100	0	8	400	16	33.36
1	C	0	0	0	100	0	8	400	16	0
1	C	0	0	0	75	0	8	425	17	50
1	C	0	0	0	75	0	8	425	17	16.67
1	C	0	0	0	75	0	8	425	17	33.36
1	C	0	0	0	100	0	8	425	17	0
1	C	0	0	0	100	0	8	425	17	33.36
1	C	0	0	0	100	0	8	425	17	0
1	C	0	0	0	75	0	8	450	18	50
1	C	0	0	0	75	0	8	450	18	16.67
1	C	0	0	0	75	0	8	450	18	33.36
1	C	0	0	0	100	0	8	450	18	0
1	C	0	0	0	100	0	8	450	18	33.36
1	C	0	0	0	100	0	8	450	18	0
1	C	0	0	0	75	0	8	475	19	50
1	C	0	0	0	75	0	8	475	19	16.67
1	C	0	0	0	75	0	8	475	19	33.36
1	C	0	0	0	100	0	8	475	19	0
1	C	0	0	0	100	0	8	475	19	33.36
1	C	0	0	0	100	0	8	475	19	0
1	C	0	0	0	75	0	8	500	20	50
1	C	0	0	0	75	0	8	500	20	16.67
1	C	0	0	0	75	0	8	500	20	33.36
1	C	0	0	0	100	0	8	500	20	0
1	C	0	0	0	100	0	8	500	20	33.36
1	C	0	0	0	100	0	8	500	20	16.67
1	2	0	1	0	75	0	8	0	0	0
1	2	0	1	0	75	0	8	0	0	0
1	2	0	1	0	75	0	8	0	0	0
1	2	0	1	0	100	0	8	0	0	0
1	2	0	1	0	100	0	8	0	0	0
1	2	0	1	0	100	0	8	0	0	0
1	2	0	1	0	75	0	8	24.9306	1	0
1	2	0	1	0	75	0	8	24.9306	1	0
1	2	0	1	0	75	0	8	24.9306	1	0
1	2	0	1	0	100	0	8	24.9306	1	0
1	2	0	1	0	100	0	8	24.9306	1	0
1	2	0	1	0	100	0	8	24.9306	1	0
1	2	0	1	0	75	0	8	49.9306	2	0
1	2	0	1	0	75	0	8	49.9306	2	0
1	2	0	1	0	75	0	8	49.9306	2	0
1	2	0	1	0	100	0	8	49.9306	2	0
1	2	0	1	0	100	0	8	49.9306	2	0
1	2	0	1	0	100	0	8	49.9306	2	0
1	2	0	1	0	75	0	8	74.9306	3	0
1	2	0	1	0	75	0	8	74.9306	3	0
1	2	0	1	0	75	0	8	74.9306	3	0
1	2	0	1	0	100	0	8	74.9306	3	0
1	2	0	1	0	100	0	8	74.9306	3	0
1	2	0	1	0	100	0	8	74.9306	3	0
1	2	0	1	0	75	0	8	99.9306	4	0
1	2	0	1	0	75	0	8	99.9306	4	16.67
1	2	0	1	0	75	0	8	99.9306	4	16.67
1	2	0	1	0	100	0	8	99.9306	4	0
1	2	0	1	0	100	0	8	99.9306	4	0
1	2	0	1	0	100	0	8	99.9306	4	0
1	2	0	1	0	75	0	8	124.931	5	0
1	2	0	1	0	75	0	8	124.931	5	16.67
1	2	0	1	0	75	0	8	124.931	5	16.67
1	2	0	1	0	100	0	8	124.931	5	0
1	2	0	1	0	100	0	8	124.931	5	0
1	2	0	1	0	100	0	8	124.931	5	0
1	2	0	1	0	75	0	8	149.931	6	0
1	2	0	1	0	75	0	8	149.931	6	16.67
1	2	0	1	0	75	0	8	149.931	6	16.67
1	2	0	1	0	100	0	8	149.931	6	0
1	2	0	1	0	100	0	8	149.931	6	0
1	2	0	1	0	100	0	8	149.931	6	0
1	2	0	1	0	75	0	8	174.931	7	0
1	2	0	1	0	75	0	8	174.931	7	33.36
1	2	0	1	0	75	0	8	174.931	7	16.67
1	2	0	1	0	100	0	8	174.931	7	16.67
1	2	0	1	0	100	0	8	174.931	7	0
1	2	0	1	0	100	0	8	174.931	7	16.67
1	2	0	1	0	75	0	8	199.931	8	0
1	2	0	1	0	75	0	8	199.931	8	33.36
1	2	0	1	0	75	0	8	199.931	8	16.67
1	2	0	1	0	100	0	8	199.931	8	16.67
1	2	0	1	0	100	0	8	199.931	8	0
1	2	0	1	0	100	0	8	199.931	8	16.67
1	2	0	1	0	75	0	8	224.931	9	16.67
1	2	0	1	0	75	0	8	224.931	9	33.36
1	2	0	1	0	75	0	8	224.931	9	16.67
1	2	0	1	0	100	0	8	224.931	9	16.67
1	2	0	1	0	100	0	8	224.931	9	0
1	2	0	1	0	100	0	8	224.931	9	16.67
1	2	0	1	0	75	0	8	249.931	10	16.67
1	2	0	1	0	75	0	8	249.931	10	33.36
1	2	0	1	0	75	0	8	249.931	10	16.67
1	2	0	1	0	100	0	8	249.931	10	16.67
1	2	0	1	0	100	0	8	249.931	10	0
1	2	0	1	0	100	0	8	249.931	10	16.67
1	2	0	1	0	75	0	8	274.931	11	16.67
1	2	0	1	0	75	0	8	274.931	11	33.36
1	2	0	1	0	75	0	8	274.931	11	16.67
1	2	0	1	0	100	0	8	274.931	11	16.67
1	2	0	1	0	100	0	8	274.931	11	0
1	2	0	1	0	100	0	8	274.931	11	16.67
1	2	0	1	0	75	0	8	299.931	12	16.67
1	2	0	1	0	75	0	8	299.931	12	33.36
1	2	0	1	0	75	0	8	299.931	12	16.67
1	2	0	1	0	100	0	8	299.931	12	16.67
1	2	0	1	0	100	0	8	299.931	12	0
1	2	0	1	0	100	0	8	299.931	12	16.67
1	2	0	1	0	75	0	8	324.931	13	16.67
1	2	0	1	0	75	0	8	324.931	13	33.36
1	2	0	1	0	75	0	8	324.931	13	16.67
1	2	0	1	0	100	0	8	324.931	13	16.67
1	2	0	1	0	100	0	8	324.931	13	0
1	2	0	1	0	100	0	8	324.931	13	16.67
1	2	0	1	0	75	0	8	349.931	14	16.67
1	2	0	1	0	75	0	8	349.931	14	33.36
1	2	0	1	0	75	0	8	349.931	14	16.67
1	2	0	1	0	100	0	8	349.931	14	16.67
1	2	0	1	0	100	0	8	349.931	14	0
1	2	0	1	0	100	0	8	349.931	14	16.67
1	2	0	1	0	75	0	8	374.931	15	16.67
1	2	0	1	0	75	0	8	374.931	15	33.36
1	2	0	1	0	75	0	8	374.931	15	16.67
1	2	0	1	0	100	0	8	374.931	15	16.67
1	2	0	1	0	100	0	8	374.931	15	0
1	2	0	1	0	100	0	8	374.931	15	16.67
1	2	0	1	0	75	0	8	399.931	16	16.67
1	2	0	1	0	75	0	8	399.931	16	33.36
1	2	0	1	0	75	0	8	399.931	16	16.67
1	2	0	1	0	100	0	8	399.931	16	16.67
1	2	0	1	0	100	0	8	399.931	16	0
1	2	0	1	0	100	0	8	399.931	16	16.67
1	2	0	1	0	75	0	8	424.931	17	16.67
1	2	0	1	0	75	0	8	424.931	17	33.36
1	2	0	1	0	75	0	8	424.931	17	16.67
1	2	0	1	0	100	0	8	424.931	17	16.67
1	2	0	1	0	100	0	8	424.931	17	0
1	2	0	1	0	100	0	8	424.931	17	16.67
1	2	0	1	0	75	0	8	449.931	18	16.67
1	2	0	1	0	75	0	8	449.931	18	33.36
1	2	0	1	0	75	0	8	449.931	18	16.67
1	2	0	1	0	100	0	8	449.931	18	16.67
1	2	0	1	0	100	0	8	449.931	18	0
1	2	0	1	0	100	0	8	449.931	18	16.67
1	2	0	1	0	75	0	8	474.931	19	16.67
1	2	0	1	0	75	0	8	474.931	19	33.36
1	2	0	1	0	75	0	8	474.931	19	16.67
1	2	0	1	0	100	0	8	474.931	19	16.67
1	2	0	1	0	100	0	8	474.931	19	0
1	2	0	1	0	100	0	8	474.931	19	16.67
1	2	0	1	0	75	0	8	499.931	20	16.67
1	2	0	1	0	75	0	8	499.931	20	33.36
1	2	0	1	0	75	0	8	499.931	20	33.36
1	2	0	1	0	100	0	8	499.931	20	50
1	2	0	1	0	100	0	8	499.931	20	0
1	2	0	1	0	100	0	8	499.931	20	16.67
1	3	0	1	3	75	3	7	0	0	0
1	3	0	1	3	75	3	7	0	0	0
1	3	0	1	3	75	3	7	0	0	0
1	3	0	1	3	100	3	7	0	0	0
1	3	0	1	3	100	3	7	0	0	0
1	3	0	1	3	100	3	7	0	0	0
1	3	0	1	3	75	3	7	4.07639	1	0
1	3	0	1	3	75	3	7	4.07639	1	0
1	3	0	1	3	75	3	7	4.07639	1	0
1	3	0	1	3	100	3	7	4.07639	1	0
1	3	0	1	3	100	3	7	4.07639	1	0
1	3	0	1	3	100	3	7	4.07639	1	0
1	3	0	1	3	75	3	7	8.07639	2	0
1	3	0	1	3	75	3	7	8.07639	2	0
1	3	0	1	3	75	3	7	8.07639	2	0
1	3	0	1	3	100	3	7	8.07639	2	0
1	3	0	1	3	100	3	7	8.07639	2	0
1	3	0	1	3	100	3	7	8.07639	2	0
1	3	0	1	3	75	3	7	12.0764	3	0
1	3	0	1	3	75	3	7	12.0764	3	0
1	3	0	1	3	75	3	7	12.0764	3	0
1	3	0	1	3	100	3	7	12.0764	3	0
1	3	0	1	3	100	3	7	12.0764	3	0
1	3	0	1	3	100	3	7	12.0764	3	0
1	3	0	1	3	75	3	7	37.0069	4	0
1	3	0	1	3	75	3	7	37.0069	4	0
1	3	0	1	3	75	3	7	37.0069	4	0
1	3	0	1	3	100	3	7	37.0069	4	0
1	3	0	1	3	100	3	7	37.0069	4	0
1	3	0	1	3	100	3	7	37.0069	4	0
1	3	0	1	3	75	3	7	62.0069	5	0
1	3	0	1	3	75	3	7	62.0069	5	0
1	3	0	1	3	75	3	7	62.0069	5	0
1	3	0	1	3	100	3	7	62.0069	5	0
1	3	0	1	3	100	3	7	62.0069	5	0
1	3	0	1	3	100	3	7	62.0069	5	0
1	3	0	1	3	75	3	7	87.0069	6	0
1	3	0	1	3	75	3	7	87.0069	6	0
1	3	0	1	3	75	3	7	87.0069	6	0
1	3	0	1	3	100	3	7	87.0069	6	0
1	3	0	1	3	100	3	7	87.0069	6	0
1	3	0	1	3	100	3	7	87.0069	6	0
1	3	0	1	3	75	3	7	112.007	7	0
1	3	0	1	3	75	3	7	112.007	7	0
1	3	0	1	3	75	3	7	112.007	7	0
1	3	0	1	3	100	3	7	112.007	7	0
1	3	0	1	3	100	3	7	112.007	7	0
1	3	0	1	3	100	3	7	112.007	7	16.67
1	3	0	1	3	75	3	7	137.007	8	0
1	3	0	1	3	75	3	7	137.007	8	0
1	3	0	1	3	75	3	7	137.007	8	0
1	3	0	1	3	100	3	7	137.007	8	0
1	3	0	1	3	100	3	7	137.007	8	0
1	3	0	1	3	100	3	7	137.007	8	16.67
1	3	0	1	3	75	3	7	162.007	9	0
1	3	0	1	3	75	3	7	162.007	9	0
1	3	0	1	3	75	3	7	162.007	9	0
1	3	0	1	3	100	3	7	162.007	9	0
1	3	0	1	3	100	3	7	162.007	9	0
1	3	0	1	3	100	3	7	162.007	9	16.67
1	3	0	1	3	75	3	7	187.007	10	0
1	3	0	1	3	75	3	7	187.007	10	16.67
1	3	0	1	3	75	3	7	187.007	10	0
1	3	0	1	3	100	3	7	187.007	10	16.67
1	3	0	1	3	100	3	7	187.007	10	16.67
1	3	0	1	3	100	3	7	187.007	10	16.67
1	3	0	1	3	75	3	7	212.007	11	0
1	3	0	1	3	75	3	7	212.007	11	16.67
1	3	0	1	3	75	3	7	212.007	11	0
1	3	0	1	3	100	3	7	212.007	11	16.67
1	3	0	1	3	100	3	7	212.007	11	16.67
1	3	0	1	3	100	3	7	212.007	11	16.67
1	3	0	1	3	75	3	7	237.007	12	0
1	3	0	1	3	75	3	7	237.007	12	16.67
1	3	0	1	3	75	3	7	237.007	12	0
1	3	0	1	3	100	3	7	237.007	12	16.67
1	3	0	1	3	100	3	7	237.007	12	16.67
1	3	0	1	3	100	3	7	237.007	12	16.67
1	3	0	1	3	75	3	7	262.007	13	0
1	3	0	1	3	75	3	7	262.007	13	16.67
1	3	0	1	3	75	3	7	262.007	13	0
1	3	0	1	3	100	3	7	262.007	13	16.67
1	3	0	1	3	100	3	7	262.007	13	16.67
1	3	0	1	3	100	3	7	262.007	13	16.67
1	3	0	1	3	75	3	7	287.007	14	0
1	3	0	1	3	75	3	7	287.007	14	16.67
1	3	0	1	3	75	3	7	287.007	14	0
1	3	0	1	3	100	3	7	287.007	14	16.67
1	3	0	1	3	100	3	7	287.007	14	16.67
1	3	0	1	3	100	3	7	287.007	14	16.67
1	3	0	1	3	75	3	7	312.007	15	0
1	3	0	1	3	75	3	7	312.007	15	16.67
1	3	0	1	3	75	3	7	312.007	15	0
1	3	0	1	3	100	3	7	312.007	15	16.67
1	3	0	1	3	100	3	7	312.007	15	16.67
1	3	0	1	3	100	3	7	312.007	15	16.67
1	3	0	1	3	75	3	7	337.007	16	0
1	3	0	1	3	75	3	7	337.007	16	16.67
1	3	0	1	3	75	3	7	337.007	16	0
1	3	0	1	3	100	3	7	337.007	16	16.67
1	3	0	1	3	100	3	7	337.007	16	16.67
1	3	0	1	3	100	3	7	337.007	16	16.67
1	3	0	1	3	75	3	7	362.007	17	0
1	3	0	1	3	75	3	7	362.007	17	16.67
1	3	0	1	3	75	3	7	362.007	17	0
1	3	0	1	3	100	3	7	362.007	17	16.67
1	3	0	1	3	100	3	7	362.007	17	16.67
1	3	0	1	3	100	3	7	362.007	17	16.67
1	3	0	1	3	75	3	7	387.007	18	0
1	3	0	1	3	75	3	7	387.007	18	16.67
1	3	0	1	3	75	3	7	387.007	18	0
1	3	0	1	3	100	3	7	387.007	18	16.67
1	3	0	1	3	100	3	7	387.007	18	16.67
1	3	0	1	3	100	3	7	387.007	18	16.67
1	3	0	1	3	75	3	7	412.007	19	0
1	3	0	1	3	75	3	7	412.007	19	16.67
1	3	0	1	3	75	3	7	412.007	19	0
1	3	0	1	3	100	3	7	412.007	19	16.67
1	3	0	1	3	100	3	7	412.007	19	16.67
1	3	0	1	3	100	3	7	412.007	19	16.67
1	3	0	1	3	75	3	7	437.007	20	0
1	3	0	1	3	75	3	7	437.007	20	16.67
1	3	0	1	3	75	3	7	437.007	20	0
1	3	0	1	3	100	3	7	437.007	20	16.67
1	3	0	1	3	100	3	7	437.007	20	33.36
1	3	0	1	3	100	3	7	437.007	20	16.67
1	7	0	1	10	75	10	6	0	0	0
1	7	0	1	10	75	10	6	0	0	0
1	7	0	1	10	75	10	6	0	0	0
1	7	0	1	10	100	10	6	0	0	0
1	7	0	1	10	100	10	6	0	0	0
1	7	0	1	10	100	10	6	0	0	0
1	7	0	1	10	75	10	6	4.07639	1	0
1	7	0	1	10	75	10	6	4.07639	1	0
1	7	0	1	10	75	10	6	4.07639	1	0
1	7	0	1	10	100	10	6	4.07639	1	0
1	7	0	1	10	100	10	6	4.07639	1	0
1	7	0	1	10	100	10	6	4.07639	1	0
1	7	0	1	10	75	10	6	8.07639	2	0
1	7	0	1	10	75	10	6	8.07639	2	0
1	7	0	1	10	75	10	6	8.07639	2	0
1	7	0	1	10	100	10	6	8.07639	2	0
1	7	0	1	10	100	10	6	8.07639	2	0
1	7	0	1	10	100	10	6	8.07639	2	0
1	7	0	1	10	75	10	6	12.0764	3	0
1	7	0	1	10	75	10	6	12.0764	3	0
1	7	0	1	10	75	10	6	12.0764	3	0
1	7	0	1	10	100	10	6	12.0764	3	0
1	7	0	1	10	100	10	6	12.0764	3	0
1	7	0	1	10	100	10	6	12.0764	3	0
1	7	0	1	10	75	10	6	16.0764	4	0
1	7	0	1	10	75	10	6	16.0764	4	0
1	7	0	1	10	75	10	6	16.0764	4	0
1	7	0	1	10	100	10	6	16.0764	4	0
1	7	0	1	10	100	10	6	16.0764	4	0
1	7	0	1	10	100	10	6	16.0764	4	0
1	7	0	1	10	75	10	6	20.0764	5	0
1	7	0	1	10	75	10	6	20.0764	5	0
1	7	0	1	10	75	10	6	20.0764	5	0
1	7	0	1	10	100	10	6	20.0764	5	0
1	7	0	1	10	100	10	6	20.0764	5	0
1	7	0	1	10	100	10	6	20.0764	5	0
1	7	0	1	10	75	10	6	24.0764	6	0
1	7	0	1	10	75	10	6	24.0764	6	0
1	7	0	1	10	75	10	6	24.0764	6	0
1	7	0	1	10	100	10	6	24.0764	6	0
1	7	0	1	10	100	10	6	24.0764	6	0
1	7	0	1	10	100	10	6	24.0764	6	0
1	7	0	1	10	75	10	6	28.0764	7	0
1	7	0	1	10	75	10	6	28.0764	7	0
1	7	0	1	10	75	10	6	28.0764	7	0
1	7	0	1	10	100	10	6	28.0764	7	0
1	7	0	1	10	100	10	6	28.0764	7	0
1	7	0	1	10	100	10	6	28.0764	7	0
1	7	0	1	10	75	10	6	32.0764	8	0
1	7	0	1	10	75	10	6	32.0764	8	0
1	7	0	1	10	75	10	6	32.0764	8	0
1	7	0	1	10	100	10	6	32.0764	8	0
1	7	0	1	10	100	10	6	32.0764	8	0
1	7	0	1	10	100	10	6	32.0764	8	0
1	7	0	1	10	75	10	6	36.0764	9	0
1	7	0	1	10	75	10	6	36.0764	9	0
1	7	0	1	10	75	10	6	36.0764	9	0
1	7	0	1	10	100	10	6	36.0764	9	0
1	7	0	1	10	100	10	6	36.0764	9	0
1	7	0	1	10	100	10	6	36.0764	9	0
1	7	0	1	10	75	10	6	40.0764	10	0
1	7	0	1	10	75	10	6	40.0764	10	0
1	7	0	1	10	75	10	6	40.0764	10	0
1	7	0	1	10	100	10	6	40.0764	10	0
1	7	0	1	10	100	10	6	40.0764	10	0
1	7	0	1	10	100	10	6	40.0764	10	0
1	7	0	1	10	75	10	6	65.0764	11	0
1	7	0	1	10	75	10	6	65.0764	11	0
1	7	0	1	10	75	10	6	65.0764	11	0
1	7	0	1	10	100	10	6	65.0764	11	0
1	7	0	1	10	100	10	6	65.0764	11	0
1	7	0	1	10	100	10	6	65.0764	11	0
1	7	0	1	10	75	10	6	90.0764	12	0
1	7	0	1	10	75	10	6	90.0764	12	0
1	7	0	1	10	75	10	6	90.0764	12	0
1	7	0	1	10	100	10	6	90.0764	12	0
1	7	0	1	10	100	10	6	90.0764	12	0
1	7	0	1	10	100	10	6	90.0764	12	0
1	7	0	1	10	75	10	6	115.076	13	0
1	7	0	1	10	75	10	6	115.076	13	0
1	7	0	1	10	75	10	6	115.076	13	0
1	7	0	1	10	100	10	6	115.076	13	0
1	7	0	1	10	100	10	6	115.076	13	0
1	7	0	1	10	100	10	6	115.076	13	0
1	7	0	1	10	75	10	6	140.076	14	0
1	7	0	1	10	75	10	6	140.076	14	0
1	7	0	1	10	75	10	6	140.076	14	0
1	7	0	1	10	100	10	6	140.076	14	33.36
1	7	0	1	10	100	10	6	140.076	14	0
1	7	0	1	10	100	10	6	140.076	14	16.67
1	7	0	1	10	75	10	6	165.076	15	0
1	7	0	1	10	75	10	6	165.076	15	0
1	7	0	1	10	75	10	6	165.076	15	0
1	7	0	1	10	100	10	6	165.076	15	33.36
1	7	0	1	10	100	10	6	165.076	15	0
1	7	0	1	10	100	10	6	165.076	15	16.67
1	7	0	1	10	75	10	6	190.076	16	16.67
1	7	0	1	10	75	10	6	190.076	16	0
1	7	0	1	10	75	10	6	190.076	16	16.67
1	7	0	1	10	100	10	6	190.076	16	33.36
1	7	0	1	10	100	10	6	190.076	16	0
1	7	0	1	10	100	10	6	190.076	16	16.67
1	7	0	1	10	75	10	6	215.076	17	16.67
1	7	0	1	10	75	10	6	215.076	17	0
1	7	0	1	10	75	10	6	215.076	17	16.67
1	7	0	1	10	100	10	6	215.076	17	33.36
1	7	0	1	10	100	10	6	215.076	17	0
1	7	0	1	10	100	10	6	215.076	17	16.67
1	7	0	1	10	75	10	6	240.076	18	16.67
1	7	0	1	10	75	10	6	240.076	18	0
1	7	0	1	10	75	10	6	240.076	18	16.67
1	7	0	1	10	100	10	6	240.076	18	33.36
1	7	0	1	10	100	10	6	240.076	18	0
1	7	0	1	10	100	10	6	240.076	18	16.67
1	7	0	1	10	75	10	6	265.076	19	16.67
1	7	0	1	10	75	10	6	265.076	19	0
1	7	0	1	10	75	10	6	265.076	19	16.67
1	7	0	1	10	100	10	6	265.076	19	33.36
1	7	0	1	10	100	10	6	265.076	19	0
1	7	0	1	10	100	10	6	265.076	19	16.67
1	7	0	1	10	75	10	6	290.076	20	16.67
1	7	0	1	10	75	10	6	290.076	20	0
1	7	0	1	10	75	10	6	290.076	20	16.67
1	7	0	1	10	100	10	6	290.076	20	33.36
1	7	0	1	10	100	10	6	290.076	20	0
1	7	0	1	10	100	10	6	290.076	20	16.67
1	5	1	1	3	75	4	7	0	0	0
1	5	1	1	3	75	4	7	0	0	0
1	5	1	1	3	75	4	7	0	0	0
1	5	1	1	3	100	4	7	0	0	0
1	5	1	1	3	100	4	7	0	0	0
1	5	1	1	3	100	4	7	0	0	0
1	5	1	1	3	75	4	7	4	1	0
1	5	1	1	3	75	4	7	4	1	0
1	5	1	1	3	75	4	7	4	1	0
1	5	1	1	3	100	4	7	4	1	0
1	5	1	1	3	100	4	7	4	1	0
1	5	1	1	3	100	4	7	4	1	0
1	5	1	1	3	75	4	7	8.07639	2	0
1	5	1	1	3	75	4	7	8.07639	2	0
1	5	1	1	3	75	4	7	8.07639	2	0
1	5	1	1	3	100	4	7	8.07639	2	0
1	5	1	1	3	100	4	7	8.07639	2	0
1	5	1	1	3	100	4	7	8.07639	2	0
1	5	1	1	3	75	4	7	12.0764	3	0
1	5	1	1	3	75	4	7	12.0764	3	0
1	5	1	1	3	75	4	7	12.0764	3	0
1	5	1	1	3	100	4	7	12.0764	3	0
1	5	1	1	3	100	4	7	12.0764	3	0
1	5	1	1	3	100	4	7	12.0764	3	0
1	5	1	1	3	75	4	7	16.0764	4	0
1	5	1	1	3	75	4	7	16.0764	4	0
1	5	1	1	3	75	4	7	16.0764	4	0
1	5	1	1	3	100	4	7	16.0764	4	0
1	5	1	1	3	100	4	7	16.0764	4	0
1	5	1	1	3	100	4	7	16.0764	4	0
1	5	1	1	3	75	4	7	41.0764	5	0
1	5	1	1	3	75	4	7	41.0764	5	0
1	5	1	1	3	75	4	7	41.0764	5	0
1	5	1	1	3	100	4	7	41.0764	5	0
1	5	1	1	3	100	4	7	41.0764	5	0
1	5	1	1	3	100	4	7	41.0764	5	0
1	5	1	1	3	75	4	7	66.0764	6	0
1	5	1	1	3	75	4	7	66.0764	6	0
1	5	1	1	3	75	4	7	66.0764	6	0
1	5	1	1	3	100	4	7	66.0764	6	0
1	5	1	1	3	100	4	7	66.0764	6	0
1	5	1	1	3	100	4	7	66.0764	6	0
1	5	1	1	3	75	4	7	91.0764	7	0
1	5	1	1	3	75	4	7	91.0764	7	0
1	5	1	1	3	75	4	7	91.0764	7	0
1	5	1	1	3	100	4	7	91.0764	7	0
1	5	1	1	3	100	4	7	91.0764	7	0
1	5	1	1	3	100	4	7	91.0764	7	0
1	5	1	1	3	75	4	7	116.076	8	0
1	5	1	1	3	75	4	7	116.076	8	0
1	5	1	1	3	75	4	7	116.076	8	0
1	5	1	1	3	100	4	7	116.076	8	0
1	5	1	1	3	100	4	7	116.076	8	0
1	5	1	1	3	100	4	7	116.076	8	0
1	5	1	1	3	75	4	7	141.076	9	0
1	5	1	1	3	75	4	7	141.076	9	0
1	5	1	1	3	75	4	7	141.076	9	0
1	5	1	1	3	100	4	7	141.076	9	0
1	5	1	1	3	100	4	7	141.076	9	0
1	5	1	1	3	100	4	7	141.076	9	0
1	5	1	1	3	75	4	7	166.076	10	0
1	5	1	1	3	75	4	7	166.076	10	0
1	5	1	1	3	75	4	7	166.076	10	0
1	5	1	1	3	100	4	7	166.076	10	0
1	5	1	1	3	100	4	7	166.076	10	0
1	5	1	1	3	100	4	7	166.076	10	0
1	5	1	1	3	75	4	7	191.076	11	16.67
1	5	1	1	3	75	4	7	191.076	11	16.67
1	5	1	1	3	75	4	7	191.076	11	0
1	5	1	1	3	100	4	7	191.076	11	0
1	5	1	1	3	100	4	7	191.076	11	16.67
1	5	1	1	3	100	4	7	191.076	11	16.67
1	5	1	1	3	75	4	7	216.076	12	16.67
1	5	1	1	3	75	4	7	216.076	12	16.67
1	5	1	1	3	75	4	7	216.076	12	0
1	5	1	1	3	100	4	7	216.076	12	0
1	5	1	1	3	100	4	7	216.076	12	16.67
1	5	1	1	3	100	4	7	216.076	12	16.67
1	5	1	1	3	75	4	7	241.076	13	16.67
1	5	1	1	3	75	4	7	241.076	13	16.67
1	5	1	1	3	75	4	7	241.076	13	0
1	5	1	1	3	100	4	7	241.076	13	0
1	5	1	1	3	100	4	7	241.076	13	16.67
1	5	1	1	3	100	4	7	241.076	13	16.67
1	5	1	1	3	75	4	7	266.076	14	16.67
1	5	1	1	3	75	4	7	266.076	14	16.67
1	5	1	1	3	75	4	7	266.076	14	0
1	5	1	1	3	100	4	7	266.076	14	0
1	5	1	1	3	100	4	7	266.076	14	16.67
1	5	1	1	3	100	4	7	266.076	14	16.67
1	5	1	1	3	75	4	7	291.076	15	16.67
1	5	1	1	3	75	4	7	291.076	15	16.67
1	5	1	1	3	75	4	7	291.076	15	0
1	5	1	1	3	100	4	7	291.076	15	0
1	5	1	1	3	100	4	7	291.076	15	16.67
1	5	1	1	3	100	4	7	291.076	15	16.67
1	5	1	1	3	75	4	7	316.076	16	16.67
1	5	1	1	3	75	4	7	316.076	16	16.67
1	5	1	1	3	75	4	7	316.076	16	0
1	5	1	1	3	100	4	7	316.076	16	0
1	5	1	1	3	100	4	7	316.076	16	16.67
1	5	1	1	3	100	4	7	316.076	16	16.67
1	5	1	1	3	75	4	7	341.076	17	16.67
1	5	1	1	3	75	4	7	341.076	17	16.67
1	5	1	1	3	75	4	7	341.076	17	0
1	5	1	1	3	100	4	7	341.076	17	0
1	5	1	1	3	100	4	7	341.076	17	16.67
1	5	1	1	3	100	4	7	341.076	17	16.67
1	5	1	1	3	75	4	7	366.076	18	16.67
1	5	1	1	3	75	4	7	366.076	18	16.67
1	5	1	1	3	75	4	7	366.076	18	0
1	5	1	1	3	100	4	7	366.076	18	0
1	5	1	1	3	100	4	7	366.076	18	16.67
1	5	1	1	3	100	4	7	366.076	18	16.67
1	5	1	1	3	75	4	7	391.076	19	16.67
1	5	1	1	3	75	4	7	391.076	19	16.67
1	5	1	1	3	75	4	7	391.076	19	0
1	5	1	1	3	100	4	7	391.076	19	0
1	5	1	1	3	100	4	7	391.076	19	16.67
1	5	1	1	3	100	4	7	391.076	19	16.67
1	5	1	1	3	75	4	7	416.076	20	16.67
1	5	1	1	3	75	4	7	416.076	20	16.67
1	5	1	1	3	75	4	7	416.076	20	0
1	5	1	1	3	100	4	7	416.076	20	0
1	5	1	1	3	100	4	7	416.076	20	16.67
1	5	1	1	3	100	4	7	416.076	20	16.67
1	8	1	1	10	75	11	6	0	0	0
1	8	1	1	10	75	11	6	0	0	0
1	8	1	1	10	75	11	6	0	0	0
1	8	1	1	10	100	11	6	0	0	0
1	8	1	1	10	100	11	6	0	0	0
1	8	1	1	10	100	11	6	0	0	0
1	8	1	1	10	75	11	6	4	1	0
1	8	1	1	10	75	11	6	4	1	0
1	8	1	1	10	75	11	6	4	1	0
1	8	1	1	10	100	11	6	4	1	0
1	8	1	1	10	100	11	6	4	1	0
1	8	1	1	10	100	11	6	4	1	0
1	8	1	1	10	75	11	6	8.07639	2	0
1	8	1	1	10	75	11	6	8.07639	2	0
1	8	1	1	10	75	11	6	8.07639	2	0
1	8	1	1	10	100	11	6	8.07639	2	0
1	8	1	1	10	100	11	6	8.07639	2	0
1	8	1	1	10	100	11	6	8.07639	2	0
1	8	1	1	10	75	11	6	12.0764	3	0
1	8	1	1	10	75	11	6	12.0764	3	0
1	8	1	1	10	75	11	6	12.0764	3	0
1	8	1	1	10	100	11	6	12.0764	3	0
1	8	1	1	10	100	11	6	12.0764	3	0
1	8	1	1	10	100	11	6	12.0764	3	0
1	8	1	1	10	75	11	6	16.0764	4	0
1	8	1	1	10	75	11	6	16.0764	4	0
1	8	1	1	10	75	11	6	16.0764	4	0
1	8	1	1	10	100	11	6	16.0764	4	0
1	8	1	1	10	100	11	6	16.0764	4	0
1	8	1	1	10	100	11	6	16.0764	4	0
1	8	1	1	10	75	11	6	20.0764	5	0
1	8	1	1	10	75	11	6	20.0764	5	0
1	8	1	1	10	75	11	6	20.0764	5	0
1	8	1	1	10	100	11	6	20.0764	5	0
1	8	1	1	10	100	11	6	20.0764	5	0
1	8	1	1	10	100	11	6	20.0764	5	0
1	8	1	1	10	75	11	6	24.0764	6	0
1	8	1	1	10	75	11	6	24.0764	6	0
1	8	1	1	10	75	11	6	24.0764	6	0
1	8	1	1	10	100	11	6	24.0764	6	0
1	8	1	1	10	100	11	6	24.0764	6	0
1	8	1	1	10	100	11	6	24.0764	6	0
1	8	1	1	10	75	11	6	28.0764	7	0
1	8	1	1	10	75	11	6	28.0764	7	0
1	8	1	1	10	75	11	6	28.0764	7	0
1	8	1	1	10	100	11	6	28.0764	7	0
1	8	1	1	10	100	11	6	28.0764	7	0
1	8	1	1	10	100	11	6	28.0764	7	0
1	8	1	1	10	75	11	6	32.0764	8	0
1	8	1	1	10	75	11	6	32.0764	8	0
1	8	1	1	10	75	11	6	32.0764	8	0
1	8	1	1	10	100	11	6	32.0764	8	0
1	8	1	1	10	100	11	6	32.0764	8	0
1	8	1	1	10	100	11	6	32.0764	8	0
1	8	1	1	10	75	11	6	36.0764	9	0
1	8	1	1	10	75	11	6	36.0764	9	0
1	8	1	1	10	75	11	6	36.0764	9	0
1	8	1	1	10	100	11	6	36.0764	9	0
1	8	1	1	10	100	11	6	36.0764	9	0
1	8	1	1	10	100	11	6	36.0764	9	0
1	8	1	1	10	75	11	6	40.0764	10	0
1	8	1	1	10	75	11	6	40.0764	10	0
1	8	1	1	10	75	11	6	40.0764	10	0
1	8	1	1	10	100	11	6	40.0764	10	0
1	8	1	1	10	100	11	6	40.0764	10	0
1	8	1	1	10	100	11	6	40.0764	10	0
1	8	1	1	10	75	11	6	44.0764	11	0
1	8	1	1	10	75	11	6	44.0764	11	0
1	8	1	1	10	75	11	6	44.0764	11	0
1	8	1	1	10	100	11	6	44.0764	11	0
1	8	1	1	10	100	11	6	44.0764	11	0
1	8	1	1	10	100	11	6	44.0764	11	0
1	8	1	1	10	75	11	6	69.0764	12	0
1	8	1	1	10	75	11	6	69.0764	12	0
1	8	1	1	10	75	11	6	69.0764	12	0
1	8	1	1	10	100	11	6	69.0764	12	0
1	8	1	1	10	100	11	6	69.0764	12	0
1	8	1	1	10	100	11	6	69.0764	12	0
1	8	1	1	10	75	11	6	94.0764	13	0
1	8	1	1	10	75	11	6	94.0764	13	0
1	8	1	1	10	75	11	6	94.0764	13	0
1	8	1	1	10	100	11	6	94.0764	13	0
1	8	1	1	10	100	11	6	94.0764	13	0
1	8	1	1	10	100	11	6	94.0764	13	0
1	8	1	1	10	75	11	6	119.076	14	0
1	8	1	1	10	75	11	6	119.076	14	0
1	8	1	1	10	75	11	6	119.076	14	0
1	8	1	1	10	100	11	6	119.076	14	0
1	8	1	1	10	100	11	6	119.076	14	0
1	8	1	1	10	100	11	6	119.076	14	0
1	8	1	1	10	75	11	6	144.076	15	16.67
1	8	1	1	10	75	11	6	144.076	15	0
1	8	1	1	10	75	11	6	144.076	15	0
1	8	1	1	10	100	11	6	144.076	15	66.67
1	8	1	1	10	100	11	6	144.076	15	50
1	8	1	1	10	100	11	6	144.076	15	0
1	8	1	1	10	75	11	6	169.076	16	16.67
1	8	1	1	10	75	11	6	169.076	16	0
1	8	1	1	10	75	11	6	169.076	16	0
1	8	1	1	10	100	11	6	169.076	16	66.67
1	8	1	1	10	100	11	6	169.076	16	50
1	8	1	1	10	100	11	6	169.076	16	0
1	8	1	1	10	75	11	6	194.076	17	16.67
1	8	1	1	10	75	11	6	194.076	17	0
1	8	1	1	10	75	11	6	194.076	17	0
1	8	1	1	10	100	11	6	194.076	17	66.67
1	8	1	1	10	100	11	6	194.076	17	50
1	8	1	1	10	100	11	6	194.076	17	0
1	8	1	1	10	75	11	6	219.076	18	16.67
1	8	1	1	10	75	11	6	219.076	18	0
1	8	1	1	10	75	11	6	219.076	18	0
1	8	1	1	10	100	11	6	219.076	18	66.67
1	8	1	1	10	100	11	6	219.076	18	50
1	8	1	1	10	100	11	6	219.076	18	0
1	8	1	1	10	75	11	6	244.076	19	16.67
1	8	1	1	10	75	11	6	244.076	19	0
1	8	1	1	10	75	11	6	244.076	19	0
1	8	1	1	10	100	11	6	244.076	19	66.67
1	8	1	1	10	100	11	6	244.076	19	50
1	8	1	1	10	100	11	6	244.076	19	0
1	8	1	1	10	75	11	6	269.076	20	16.67
1	8	1	1	10	75	11	6	269.076	20	0
1	8	1	1	10	75	11	6	269.076	20	0
1	8	1	1	10	100	11	6	269.076	20	66.67
1	8	1	1	10	100	11	6	269.076	20	50
1	8	1	1	10	100	11	6	269.076	20	0
1	4	3	1	0	75	3	7	0	0	0
1	4	3	1	0	75	3	7	0	0	0
1	4	3	1	0	75	3	7	0	0	0
1	4	3	1	0	100	3	7	0	0	0
1	4	3	1	0	100	3	7	0	0	0
1	4	3	1	0	100	3	7	0	0	0
1	4	3	1	0	75	3	7	4	1	0
1	4	3	1	0	75	3	7	4	1	0
1	4	3	1	0	75	3	7	4	1	0
1	4	3	1	0	100	3	7	4	1	0
1	4	3	1	0	100	3	7	4	1	0
1	4	3	1	0	100	3	7	4	1	0
1	4	3	1	0	75	3	7	8	2	0
1	4	3	1	0	75	3	7	8	2	0
1	4	3	1	0	75	3	7	8	2	0
1	4	3	1	0	100	3	7	8	2	0
1	4	3	1	0	100	3	7	8	2	0
1	4	3	1	0	100	3	7	8	2	0
1	4	3	1	0	75	3	7	12	3	0
1	4	3	1	0	75	3	7	12	3	0
1	4	3	1	0	75	3	7	12	3	0
1	4	3	1	0	100	3	7	12	3	0
1	4	3	1	0	100	3	7	12	3	0
1	4	3	1	0	100	3	7	12	3	0
1	4	3	1	0	75	3	7	36.9306	4	0
1	4	3	1	0	75	3	7	36.9306	4	0
1	4	3	1	0	75	3	7	36.9306	4	0
1	4	3	1	0	100	3	7	36.9306	4	0
1	4	3	1	0	100	3	7	36.9306	4	0
1	4	3	1	0	100	3	7	36.9306	4	0
1	4	3	1	0	75	3	7	61.9306	5	0
1	4	3	1	0	75	3	7	61.9306	5	0
1	4	3	1	0	75	3	7	61.9306	5	0
1	4	3	1	0	100	3	7	61.9306	5	0
1	4	3	1	0	100	3	7	61.9306	5	0
1	4	3	1	0	100	3	7	61.9306	5	0
1	4	3	1	0	75	3	7	86.9306	6	0
1	4	3	1	0	75	3	7	86.9306	6	0
1	4	3	1	0	75	3	7	86.9306	6	0
1	4	3	1	0	100	3	7	86.9306	6	0
1	4	3	1	0	100	3	7	86.9306	6	0
1	4	3	1	0	100	3	7	86.9306	6	0
1	4	3	1	0	75	3	7	111.931	7	0
1	4	3	1	0	75	3	7	111.931	7	0
1	4	3	1	0	75	3	7	111.931	7	0
1	4	3	1	0	100	3	7	111.931	7	0
1	4	3	1	0	100	3	7	111.931	7	0
1	4	3	1	0	100	3	7	111.931	7	0
1	4	3	1	0	75	3	7	136.931	8	0
1	4	3	1	0	75	3	7	136.931	8	0
1	4	3	1	0	75	3	7	136.931	8	0
1	4	3	1	0	100	3	7	136.931	8	0
1	4	3	1	0	100	3	7	136.931	8	0
1	4	3	1	0	100	3	7	136.931	8	0
1	4	3	1	0	75	3	7	161.931	9	0
1	4	3	1	0	75	3	7	161.931	9	0
1	4	3	1	0	75	3	7	161.931	9	0
1	4	3	1	0	100	3	7	161.931	9	0
1	4	3	1	0	100	3	7	161.931	9	0
1	4	3	1	0	100	3	7	161.931	9	0
1	4	3	1	0	75	3	7	186.931	10	0
1	4	3	1	0	75	3	7	186.931	10	0
1	4	3	1	0	75	3	7	186.931	10	0
1	4	3	1	0	100	3	7	186.931	10	16.67
1	4	3	1	0	100	3	7	186.931	10	0
1	4	3	1	0	100	3	7	186.931	10	16.67
1	4	3	1	0	75	3	7	211.931	11	0
1	4	3	1	0	75	3	7	211.931	11	0
1	4	3	1	0	75	3	7	211.931	11	0
1	4	3	1	0	100	3	7	211.931	11	16.67
1	4	3	1	0	100	3	7	211.931	11	0
1	4	3	1	0	100	3	7	211.931	11	16.67
1	4	3	1	0	75	3	7	236.931	12	0
1	4	3	1	0	75	3	7	236.931	12	0
1	4	3	1	0	75	3	7	236.931	12	0
1	4	3	1	0	100	3	7	236.931	12	16.67
1	4	3	1	0	100	3	7	236.931	12	0
1	4	3	1	0	100	3	7	236.931	12	16.67
1	4	3	1	0	75	3	7	261.931	13	0
1	4	3	1	0	75	3	7	261.931	13	0
1	4	3	1	0	75	3	7	261.931	13	0
1	4	3	1	0	100	3	7	261.931	13	16.67
1	4	3	1	0	100	3	7	261.931	13	0
1	4	3	1	0	100	3	7	261.931	13	16.67
1	4	3	1	0	75	3	7	286.931	14	0
1	4	3	1	0	75	3	7	286.931	14	0
1	4	3	1	0	75	3	7	286.931	14	0
1	4	3	1	0	100	3	7	286.931	14	16.67
1	4	3	1	0	100	3	7	286.931	14	0
1	4	3	1	0	100	3	7	286.931	14	16.67
1	4	3	1	0	75	3	7	311.931	15	0
1	4	3	1	0	75	3	7	311.931	15	0
1	4	3	1	0	75	3	7	311.931	15	0
1	4	3	1	0	100	3	7	311.931	15	16.67
1	4	3	1	0	100	3	7	311.931	15	0
1	4	3	1	0	100	3	7	311.931	15	16.67
1	4	3	1	0	75	3	7	336.931	16	0
1	4	3	1	0	75	3	7	336.931	16	0
1	4	3	1	0	75	3	7	336.931	16	0
1	4	3	1	0	100	3	7	336.931	16	16.67
1	4	3	1	0	100	3	7	336.931	16	0
1	4	3	1	0	100	3	7	336.931	16	16.67
1	4	3	1	0	75	3	7	361.931	17	0
1	4	3	1	0	75	3	7	361.931	17	0
1	4	3	1	0	75	3	7	361.931	17	0
1	4	3	1	0	100	3	7	361.931	17	16.67
1	4	3	1	0	100	3	7	361.931	17	0
1	4	3	1	0	100	3	7	361.931	17	16.67
1	4	3	1	0	75	3	7	386.931	18	0
1	4	3	1	0	75	3	7	386.931	18	0
1	4	3	1	0	75	3	7	386.931	18	0
1	4	3	1	0	100	3	7	386.931	18	16.67
1	4	3	1	0	100	3	7	386.931	18	0
1	4	3	1	0	100	3	7	386.931	18	16.67
1	4	3	1	0	75	3	7	411.931	19	0
1	4	3	1	0	75	3	7	411.931	19	0
1	4	3	1	0	75	3	7	411.931	19	0
1	4	3	1	0	100	3	7	411.931	19	16.67
1	4	3	1	0	100	3	7	411.931	19	0
1	4	3	1	0	100	3	7	411.931	19	16.67
1	4	3	1	0	75	3	7	436.931	20	0
1	4	3	1	0	75	3	7	436.931	20	0
1	4	3	1	0	75	3	7	436.931	20	0
1	4	3	1	0	100	3	7	436.931	20	16.67
1	4	3	1	0	100	3	7	436.931	20	0
1	4	3	1	0	100	3	7	436.931	20	16.67
1	6	3	1	3	75	6	7	0	0	0
1	6	3	1	3	75	6	7	0	0	0
1	6	3	1	3	75	6	7	0	0	0
1	6	3	1	3	100	6	7	0	0	0
1	6	3	1	3	100	6	7	0	0	0
1	6	3	1	3	100	6	7	0	0	0
1	6	3	1	3	75	6	7	4	1	0
1	6	3	1	3	75	6	7	4	1	0
1	6	3	1	3	75	6	7	4	1	0
1	6	3	1	3	100	6	7	4	1	0
1	6	3	1	3	100	6	7	4	1	0
1	6	3	1	3	100	6	7	4	1	0
1	6	3	1	3	75	6	7	8	2	0
1	6	3	1	3	75	6	7	8	2	0
1	6	3	1	3	75	6	7	8	2	0
1	6	3	1	3	100	6	7	8	2	0
1	6	3	1	3	100	6	7	8	2	0
1	6	3	1	3	100	6	7	8	2	0
1	6	3	1	3	75	6	7	12	3	0
1	6	3	1	3	75	6	7	12	3	0
1	6	3	1	3	75	6	7	12	3	0
1	6	3	1	3	100	6	7	12	3	0
1	6	3	1	3	100	6	7	12	3	0
1	6	3	1	3	100	6	7	12	3	0
1	6	3	1	3	75	6	7	16.0764	4	0
1	6	3	1	3	75	6	7	16.0764	4	0
1	6	3	1	3	75	6	7	16.0764	4	0
1	6	3	1	3	100	6	7	16.0764	4	0
1	6	3	1	3	100	6	7	16.0764	4	0
1	6	3	1	3	100	6	7	16.0764	4	0
1	6	3	1	3	75	6	7	20.0764	5	0
1	6	3	1	3	75	6	7	20.0764	5	0
1	6	3	1	3	75	6	7	20.0764	5	0
1	6	3	1	3	100	6	7	20.0764	5	0
1	6	3	1	3	100	6	7	20.0764	5	0
1	6	3	1	3	100	6	7	20.0764	5	0
1	6	3	1	3	75	6	7	24.0764	6	0
1	6	3	1	3	75	6	7	24.0764	6	0
1	6	3	1	3	75	6	7	24.0764	6	0
1	6	3	1	3	100	6	7	24.0764	6	0
1	6	3	1	3	100	6	7	24.0764	6	0
1	6	3	1	3	100	6	7	24.0764	6	0
1	6	3	1	3	75	6	7	49.0764	7	0
1	6	3	1	3	75	6	7	49.0764	7	0
1	6	3	1	3	75	6	7	49.0764	7	0
1	6	3	1	3	100	6	7	49.0764	7	0
1	6	3	1	3	100	6	7	49.0764	7	0
1	6	3	1	3	100	6	7	49.0764	7	0
1	6	3	1	3	75	6	7	74.0764	8	0
1	6	3	1	3	75	6	7	74.0764	8	0
1	6	3	1	3	75	6	7	74.0764	8	0
1	6	3	1	3	100	6	7	74.0764	8	0
1	6	3	1	3	100	6	7	74.0764	8	0
1	6	3	1	3	100	6	7	74.0764	8	0
1	6	3	1	3	75	6	7	99.0764	9	0
1	6	3	1	3	75	6	7	99.0764	9	0
1	6	3	1	3	75	6	7	99.0764	9	0
1	6	3	1	3	100	6	7	99.0764	9	0
1	6	3	1	3	100	6	7	99.0764	9	0
1	6	3	1	3	100	6	7	99.0764	9	0
1	6	3	1	3	75	6	7	124.076	10	0
1	6	3	1	3	75	6	7	124.076	10	0
1	6	3	1	3	75	6	7	124.076	10	0
1	6	3	1	3	100	6	7	124.076	10	0
1	6	3	1	3	100	6	7	124.076	10	16.67
1	6	3	1	3	100	6	7	124.076	10	0
1	6	3	1	3	75	6	7	149.076	11	0
1	6	3	1	3	75	6	7	149.076	11	0
1	6	3	1	3	75	6	7	149.076	11	0
1	6	3	1	3	100	6	7	149.076	11	0
1	6	3	1	3	100	6	7	149.076	11	16.67
1	6	3	1	3	100	6	7	149.076	11	0
1	6	3	1	3	75	6	7	174.076	12	0
1	6	3	1	3	75	6	7	174.076	12	0
1	6	3	1	3	75	6	7	174.076	12	0
1	6	3	1	3	100	6	7	174.076	12	0
1	6	3	1	3	100	6	7	174.076	12	16.67
1	6	3	1	3	100	6	7	174.076	12	0
1	6	3	1	3	75	6	7	199.076	13	0
1	6	3	1	3	75	6	7	199.076	13	0
1	6	3	1	3	75	6	7	199.076	13	0
1	6	3	1	3	100	6	7	199.076	13	0
1	6	3	1	3	100	6	7	199.076	13	16.67
1	6	3	1	3	100	6	7	199.076	13	0
1	6	3	1	3	75	6	7	224.076	14	0
1	6	3	1	3	75	6	7	224.076	14	0
1	6	3	1	3	75	6	7	224.076	14	0
1	6	3	1	3	100	6	7	224.076	14	0
1	6	3	1	3	100	6	7	224.076	14	16.67
1	6	3	1	3	100	6	7	224.076	14	0
1	6	3	1	3	75	6	7	249.076	15	0
1	6	3	1	3	75	6	7	249.076	15	0
1	6	3	1	3	75	6	7	249.076	15	0
1	6	3	1	3	100	6	7	249.076	15	0
1	6	3	1	3	100	6	7	249.076	15	16.67
1	6	3	1	3	100	6	7	249.076	15	0
1	6	3	1	3	75	6	7	274.076	16	0
1	6	3	1	3	75	6	7	274.076	16	0
1	6	3	1	3	75	6	7	274.076	16	0
1	6	3	1	3	100	6	7	274.076	16	0
1	6	3	1	3	100	6	7	274.076	16	16.67
1	6	3	1	3	100	6	7	274.076	16	0
1	6	3	1	3	75	6	7	299.076	17	0
1	6	3	1	3	75	6	7	299.076	17	0
1	6	3	1	3	75	6	7	299.076	17	0
1	6	3	1	3	100	6	7	299.076	17	0
1	6	3	1	3	100	6	7	299.076	17	16.67
1	6	3	1	3	100	6	7	299.076	17	0
1	6	3	1	3	75	6	7	324.076	18	0
1	6	3	1	3	75	6	7	324.076	18	0
1	6	3	1	3	75	6	7	324.076	18	0
1	6	3	1	3	100	6	7	324.076	18	0
1	6	3	1	3	100	6	7	324.076	18	16.67
1	6	3	1	3	100	6	7	324.076	18	0
1	6	3	1	3	75	6	7	349.076	19	0
1	6	3	1	3	75	6	7	349.076	19	0
1	6	3	1	3	75	6	7	349.076	19	0
1	6	3	1	3	100	6	7	349.076	19	0
1	6	3	1	3	100	6	7	349.076	19	16.67
1	6	3	1	3	100	6	7	349.076	19	0
1	6	3	1	3	75	6	7	374.076	20	0
1	6	3	1	3	75	6	7	374.076	20	0
1	6	3	1	3	75	6	7	374.076	20	16.67
1	6	3	1	3	100	6	7	374.076	20	16.67
1	6	3	1	3	100	6	7	374.076	20	16.67
1	6	3	1	3	100	6	7	374.076	20	0
1	9	3	1	10	75	13	6	0	0	0
1	9	3	1	10	75	13	6	0	0	0
1	9	3	1	10	75	13	6	0	0	0
1	9	3	1	10	100	13	6	0	0	0
1	9	3	1	10	100	13	6	0	0	0
1	9	3	1	10	100	13	6	0	0	0
1	9	3	1	10	75	13	6	4	1	0
1	9	3	1	10	75	13	6	4	1	0
1	9	3	1	10	75	13	6	4	1	0
1	9	3	1	10	100	13	6	4	1	0
1	9	3	1	10	100	13	6	4	1	0
1	9	3	1	10	100	13	6	4	1	0
1	9	3	1	10	75	13	6	8	2	0
1	9	3	1	10	75	13	6	8	2	0
1	9	3	1	10	75	13	6	8	2	0
1	9	3	1	10	100	13	6	8	2	0
1	9	3	1	10	100	13	6	8	2	0
1	9	3	1	10	100	13	6	8	2	0
1	9	3	1	10	75	13	6	12	3	0
1	9	3	1	10	75	13	6	12	3	0
1	9	3	1	10	75	13	6	12	3	0
1	9	3	1	10	100	13	6	12	3	0
1	9	3	1	10	100	13	6	12	3	0
1	9	3	1	10	100	13	6	12	3	0
1	9	3	1	10	75	13	6	16.0764	4	0
1	9	3	1	10	75	13	6	16.0764	4	0
1	9	3	1	10	75	13	6	16.0764	4	0
1	9	3	1	10	100	13	6	16.0764	4	0
1	9	3	1	10	100	13	6	16.0764	4	0
1	9	3	1	10	100	13	6	16.0764	4	0
1	9	3	1	10	75	13	6	20.0764	5	0
1	9	3	1	10	75	13	6	20.0764	5	0
1	9	3	1	10	75	13	6	20.0764	5	0
1	9	3	1	10	100	13	6	20.0764	5	0
1	9	3	1	10	100	13	6	20.0764	5	0
1	9	3	1	10	100	13	6	20.0764	5	0
1	9	3	1	10	75	13	6	24.0764	6	0
1	9	3	1	10	75	13	6	24.0764	6	0
1	9	3	1	10	75	13	6	24.0764	6	0
1	9	3	1	10	100	13	6	24.0764	6	0
1	9	3	1	10	100	13	6	24.0764	6	0
1	9	3	1	10	100	13	6	24.0764	6	0
1	9	3	1	10	75	13	6	28.0764	7	0
1	9	3	1	10	75	13	6	28.0764	7	0
1	9	3	1	10	75	13	6	28.0764	7	0
1	9	3	1	10	100	13	6	28.0764	7	0
1	9	3	1	10	100	13	6	28.0764	7	0
1	9	3	1	10	100	13	6	28.0764	7	0
1	9	3	1	10	75	13	6	32.0764	8	0
1	9	3	1	10	75	13	6	32.0764	8	0
1	9	3	1	10	75	13	6	32.0764	8	0
1	9	3	1	10	100	13	6	32.0764	8	0
1	9	3	1	10	100	13	6	32.0764	8	0
1	9	3	1	10	100	13	6	32.0764	8	0
1	9	3	1	10	75	13	6	36.0764	9	0
1	9	3	1	10	75	13	6	36.0764	9	0
1	9	3	1	10	75	13	6	36.0764	9	0
1	9	3	1	10	100	13	6	36.0764	9	0
1	9	3	1	10	100	13	6	36.0764	9	0
1	9	3	1	10	100	13	6	36.0764	9	0
1	9	3	1	10	75	13	6	40.0764	10	0
1	9	3	1	10	75	13	6	40.0764	10	0
1	9	3	1	10	75	13	6	40.0764	10	0
1	9	3	1	10	100	13	6	40.0764	10	0
1	9	3	1	10	100	13	6	40.0764	10	0
1	9	3	1	10	100	13	6	40.0764	10	0
1	9	3	1	10	75	13	6	44.0764	11	0
1	9	3	1	10	75	13	6	44.0764	11	0
1	9	3	1	10	75	13	6	44.0764	11	0
1	9	3	1	10	100	13	6	44.0764	11	0
1	9	3	1	10	100	13	6	44.0764	11	0
1	9	3	1	10	100	13	6	44.0764	11	0
1	9	3	1	10	75	13	6	48.0764	12	0
1	9	3	1	10	75	13	6	48.0764	12	0
1	9	3	1	10	75	13	6	48.0764	12	0
1	9	3	1	10	100	13	6	48.0764	12	0
1	9	3	1	10	100	13	6	48.0764	12	0
1	9	3	1	10	100	13	6	48.0764	12	0
1	9	3	1	10	75	13	6	52.0764	13	0
1	9	3	1	10	75	13	6	52.0764	13	0
1	9	3	1	10	75	13	6	52.0764	13	0
1	9	3	1	10	100	13	6	52.0764	13	0
1	9	3	1	10	100	13	6	52.0764	13	0
1	9	3	1	10	100	13	6	52.0764	13	0
1	9	3	1	10	75	13	6	77.0764	14	0
1	9	3	1	10	75	13	6	77.0764	14	0
1	9	3	1	10	75	13	6	77.0764	14	0
1	9	3	1	10	100	13	6	77.0764	14	0
1	9	3	1	10	100	13	6	77.0764	14	0
1	9	3	1	10	100	13	6	77.0764	14	0
1	9	3	1	10	75	13	6	102.076	15	0
1	9	3	1	10	75	13	6	102.076	15	0
1	9	3	1	10	75	13	6	102.076	15	0
1	9	3	1	10	100	13	6	102.076	15	0
1	9	3	1	10	100	13	6	102.076	15	0
1	9	3	1	10	100	13	6	102.076	15	0
1	9	3	1	10	75	13	6	127.076	16	0
1	9	3	1	10	75	13	6	127.076	16	0
1	9	3	1	10	75	13	6	127.076	16	0
1	9	3	1	10	100	13	6	127.076	16	0
1	9	3	1	10	100	13	6	127.076	16	0
1	9	3	1	10	100	13	6	127.076	16	0
1	9	3	1	10	75	13	6	152.076	17	0
1	9	3	1	10	75	13	6	152.076	17	0
1	9	3	1	10	75	13	6	152.076	17	0
1	9	3	1	10	100	13	6	152.076	17	0
1	9	3	1	10	100	13	6	152.076	17	0
1	9	3	1	10	100	13	6	152.076	17	0
1	9	3	1	10	75	13	6	177.076	18	0
1	9	3	1	10	75	13	6	177.076	18	0
1	9	3	1	10	75	13	6	177.076	18	0
1	9	3	1	10	100	13	6	177.076	18	0
1	9	3	1	10	100	13	6	177.076	18	0
1	9	3	1	10	100	13	6	177.076	18	0
1	9	3	1	10	75	13	6	202.076	19	0
1	9	3	1	10	75	13	6	202.076	19	0
1	9	3	1	10	75	13	6	202.076	19	0
1	9	3	1	10	100	13	6	202.076	19	0
1	9	3	1	10	100	13	6	202.076	19	0
1	9	3	1	10	100	13	6	202.076	19	0
1	9	3	1	10	75	13	6	227.076	20	100
1	9	3	1	10	75	13	6	227.076	20	33.36
1	9	3	1	10	75	13	6	227.076	20	33.36
1	9	3	1	10	100	13	6	227.076	20	0
1	9	3	1	10	100	13	6	227.076	20	0
1	9	3	1	10	100	13	6	227.076	20	0

## Sheet: Experiment 2
Experiment	Treatment	pre cooling	Water dumping	cold-storage chamber	RH%	cold days	incubation days<200DD	DD	incubation days	%IL		Experiment	Treatment	RH%	AULIC
2	C	0	0	0	75	0	8	0	0	0		2	1	75	350	116.667
2	C	0	0	0	75	0	8	0	0	0		2	1	75	0
2	C	0	0	0	75	0	8	0	0	0		2	1	75	0
2	C	0	0	0	100	0	8	0	0	0		2	1	75	350
2	C	0	0	0	100	0	8	0	0	0		2	1	75	0
2	C	0	0	0	100	0	8	0	0	0		2	1	75	0
2	C	0	0	0	75	0	8	1	25	0		2	2	100	0
2	C	0	0	0	75	0	8	1	25	0		2	2	100	0
2	C	0	0	0	75	0	8	1	25	0		2	2	100	350
2	C	0	0	0	75	0	8	1	25	0		2	2	100	350
2	C	0	0	0	75	0	8	1	25	0		2	2	100	0
2	C	0	0	0	75	0	8	1	25	0		2	2	100	0
2	C	0	0	0	100	0	8	1	25	0		2	3	75	0	74.1667
2	C	0	0	0	100	0	8	1	25	0		2	3	75	270
2	C	0	0	0	100	0	8	1	25	0		2	3	75	0
2	C	0	0	0	100	0	8	1	25	0		2	3	75	0
2	C	0	0	0	100	0	8	1	25	0		2	3	75	0
2	C	0	0	0	100	0	8	1	25	0		2	3	75	270
2	C	0	0	0	75	0	8	2	50	0		2	7	100	0
2	C	0	0	0	75	0	8	2	50	0		2	7	100	0
2	C	0	0	0	75	0	8	2	50	0		2	7	100	0
2	C	0	0	0	75	0	8	2	50	0		2	7	100	0
2	C	0	0	0	75	0	8	2	50	0		2	7	100	350
2	C	0	0	0	75	0	8	2	50	0		2	7	100	0
2	C	0	0	0	100	0	8	2	50	0		2	5	75	0	61.6667
2	C	0	0	0	100	0	8	2	50	0		2	5	75	10
2	C	0	0	0	100	0	8	2	50	0		2	5	75	0
2	C	0	0	0	100	0	8	2	50	0		2	5	75	0
2	C	0	0	0	100	0	8	2	50	0		2	5	75	0
2	C	0	0	0	100	0	8	2	50	0		2	5	75	270
2	C	0	0	0	75	0	8	3	75	20		2	8	100	0
2	C	0	0	0	75	0	8	3	75	0		2	8	100	0
2	C	0	0	0	75	0	8	3	75	0		2	8	100	0
2	C	0	0	0	75	0	8	3	75	20		2	8	100	230
2	C	0	0	0	75	0	8	3	75	0		2	8	100	230
2	C	0	0	0	75	0	8	3	75	0		2	8	100	0
2	C	0	0	0	100	0	8	3	75	0		2	4	75	0	20
2	C	0	0	0	100	0	8	3	75	0		2	4	75	0
2	C	0	0	0	100	0	8	3	75	20		2	4	75	0
2	C	0	0	0	100	0	8	3	75	20		2	4	75	0
2	C	0	0	0	100	0	8	3	75	0		2	4	75	0
2	C	0	0	0	100	0	8	3	75	0		2	4	75	0
2	C	0	0	0	75	0	8	4	100	20		2	6	100	0
2	C	0	0	0	75	0	8	4	100	0		2	6	100	0
2	C	0	0	0	75	0	8	4	100	0		2	6	100	0
2	C	0	0	0	75	0	8	4	100	20		2	6	100	0
2	C	0	0	0	75	0	8	4	100	0		2	6	100	110
2	C	0	0	0	75	0	8	4	100	0		2	6	100	130
2	C	0	0	0	100	0	8	4	100	0		2	9	75	270	#REF!
2	C	0	0	0	100	0	8	4	100	0		2	9	75	270
2	C	0	0	0	100	0	8	4	100	20		2	9	75	0
2	C	0	0	0	100	0	8	4	100	20		2	9	75	10
2	C	0	0	0	100	0	8	4	100	0		2	9	75	270
2	C	0	0	0	100	0	8	4	100	0		2	9	75	0
2	C	0	0	0	75	0	8	5	125	20		2		100	0
2	C	0	0	0	75	0	8	5	125	0		2		100	0
2	C	0	0	0	75	0	8	5	125	0		2		100	0
2	C	0	0	0	75	0	8	5	125	20		2		100	0
2	C	0	0	0	75	0	8	5	125	0		2		100	0
2	C	0	0	0	75	0	8	5	125	0		2		100	0
2	C	0	0	0	100	0	8	5	125	0		2		75	110	68.3333
2	C	0	0	0	100	0	8	5	125	0		2		75	0
2	C	0	0	0	100	0	8	5	125	20		2		75	120
2	C	0	0	0	100	0	8	5	125	20		2		75	0
2	C	0	0	0	100	0	8	5	125	0		2		75	50
2	C	0	0	0	100	0	8	5	125	0		2		75	0
2	C	0	0	0	75	0	8	6	150	20		2		100	0
2	C	0	0	0	75	0	8	6	150	0		2		100
2	C	0	0	0	75	0	8	6	150	0		2		100	0
2	C	0	0	0	75	0	8	6	150	20		2		100	130
2	C	0	0	0	75	0	8	6	150	0		2		100	0
2	C	0	0	0	75	0	8	6	150	0		2		100	130
2	C	0	0	0	100	0	8	6	150	0		2		75	310	49.0909
2	C	0	0	0	100	0	8	6	150	0		2		75	0
2	C	0	0	0	100	0	8	6	150	20		2		75	0
2	C	0	0	0	100	0	8	6	150	20		2		75	0
2	C	0	0	0	100	0	8	6	150	0		2		75	0
2	C	0	0	0	100	0	8	6	150	0		2		75	0
2	C	0	0	0	75	0	8	7	175	20		2		100	270
2	C	0	0	0	75	0	8	7	175	0		2		100	0
2	C	0	0	0	75	0	8	7	175	0		2		100	0
2	C	0	0	0	75	0	8	7	175	20		2		100	0
2	C	0	0	0	75	0	8	7	175	0		2		100	250
2	C	0	0	0	75	0	8	7	175	0		2		100	270
2	C	0	0	0	100	0	8	7	175	0		2		75	0	91.6667
2	C	0	0	0	100	0	8	7	175	0		2		75	0
2	C	0	0	0	100	0	8	7	175	20		2		75	270
2	C	0	0	0	100	0	8	7	175	20		2		75	0
2	C	0	0	0	100	0	8	7	175	0		2		75	230
2	C	0	0	0	100	0	8	7	175	0		2		75	0
2	C	0	0	0	75	0	8	8	200	20		2		100	0
2	C	0	0	0	75	0	8	8	200	0		2		100	0
2	C	0	0	0	75	0	8	8	200	0		2		100	0
2	C	0	0	0	75	0	8	8	200	20		2		100	250
2	C	0	0	0	75	0	8	8	200	0		2		100	0
2	C	0	0	0	75	0	8	8	200	0		2		100	0
2	C	0	0	0	100	0	8	8	200	0		2		75	0	62.5
2	C	0	0	0	100	0	8	8	200	0		2		75	10
2	C	0	0	0	100	0	8	8	200	20		2		75	160
2	C	0	0	0	100	0	8	8	200	20		2		75	0
2	C	0	0	0	100	0	8	8	200	0		2		75	10
2	C	0	0	0	100	0	8	8	200	0		2		75	150
2	C	0	0	0	75	0	8	9	225	20		2		100	0
2	C	0	0	0	75	0	8	9	225	0		2		100	110
2	C	0	0	0	75	0	8	9	225	0		2		100	0
2	C	0	0	0	75	0	8	9	225	20		2		100	0
2	C	0	0	0	75	0	8	9	225	0		2		100	0
2	C	0	0	0	75	0	8	9	225	0		2		100	0
2	C	0	0	0	100	0	8	9	225	0						36.6667
2	C	0	0	0	100	0	8	9	225	0
2	C	0	0	0	100	0	8	9	225	20
2	C	0	0	0	100	0	8	9	225	20
2	C	0	0	0	100	0	8	9	225	0
2	C	0	0	0	100	0	8	9	225	0
2	C	0	0	0	75	0	8	10	250	20
2	C	0	0	0	75	0	8	10	250	0
2	C	0	0	0	75	0	8	10	250	0
2	C	0	0	0	75	0	8	10	250	20
2	C	0	0	0	75	0	8	10	250	0
2	C	0	0	0	75	0	8	10	250	0
2	C	0	0	0	100	0	8	10	250	0
2	C	0	0	0	100	0	8	10	250	0
2	C	0	0	0	100	0	8	10	250	20
2	C	0	0	0	100	0	8	10	250	20
2	C	0	0	0	100	0	8	10	250	0
2	C	0	0	0	100	0	8	10	250	0
2	2	0	0	0	75	0	8	11	275	20
2	2	0	0	0	75	0	8	11	275	0
2	2	0	0	0	75	0	8	11	275	0
2	2	0	0	0	75	0	8	11	275	20
2	2	0	0	0	75	0	8	11	275	0
2	2	0	0	0	75	0	8	11	275	0
2	2	0	0	0	100	0	8	11	275	0
2	2	0	0	0	100	0	8	11	275	0
2	2	0	0	0	100	0	8	11	275	20
2	2	0	0	0	100	0	8	11	275	20
2	2	0	0	0	100	0	8	11	275	0
2	2	0	0	0	100	0	8	11	275	0
2	2	0	0	0	75	0	8	12	300	20
2	2	0	0	0	75	0	8	12	300	0
2	2	0	0	0	75	0	8	12	300	0
2	2	0	0	0	75	0	8	12	300	20
2	2	0	0	0	75	0	8	12	300	0
2	2	0	0	0	75	0	8	12	300	0
2	2	0	0	0	100	0	8	12	300	0
2	2	0	0	0	100	0	8	12	300	0
2	2	0	0	0	100	0	8	12	300	20
2	2	0	0	0	100	0	8	12	300	20
2	2	0	0	0	100	0	8	12	300	0
2	2	0	0	0	100	0	8	12	300	0
2	2	0	0	0	75	0	8	13	325	20
2	2	0	0	0	75	0	8	13	325	0
2	2	0	0	0	75	0	8	13	325	0
2	2	0	0	0	75	0	8	13	325	20
2	2	0	0	0	75	0	8	13	325	0
2	2	0	0	0	75	0	8	13	325	0
2	2	0	0	0	100	0	8	13	325	0
2	2	0	0	0	100	0	8	13	325	0
2	2	0	0	0	100	0	8	13	325	20
2	2	0	0	0	100	0	8	13	325	20
2	2	0	0	0	100	0	8	13	325	0
2	2	0	0	0	100	0	8	13	325	0
2	2	0	0	0	75	0	8	14	350	20
2	2	0	0	0	75	0	8	14	350	0
2	2	0	0	0	75	0	8	14	350	0
2	2	0	0	0	75	0	8	14	350	20
2	2	0	0	0	75	0	8	14	350	0
2	2	0	0	0	75	0	8	14	350	0
2	2	0	0	0	100	0	8	14	350	0
2	2	0	0	0	100	0	8	14	350	0
2	2	0	0	0	100	0	8	14	350	20
2	2	0	0	0	100	0	8	14	350	20
2	2	0	0	0	100	0	8	14	350	0
2	2	0	0	0	100	0	8	14	350	0
2	2	0	0	0	75	0	8	15	375	20
2	2	0	0	0	75	0	8	15	375	0
2	2	0	0	0	75	0	8	15	375	0
2	2	0	0	0	75	0	8	15	375	20
2	2	0	0	0	75	0	8	15	375	0
2	2	0	0	0	75	0	8	15	375	0
2	2	0	0	0	100	0	8	15	375	0
2	2	0	0	0	100	0	8	15	375	0
2	2	0	0	0	100	0	8	15	375	20
2	2	0	0	0	100	0	8	15	375	20
2	2	0	0	0	100	0	8	15	375	0
2	2	0	0	0	100	0	8	15	375	0
2	2	0	0	0	75	0	8	16	400	20
2	2	0	0	0	75	0	8	16	400	0
2	2	0	0	0	75	0	8	16	400	0
2	2	0	0	0	75	0	8	16	400	20
2	2	0	0	0	75	0	8	16	400	0
2	2	0	0	0	75	0	8	16	400	0
2	2	0	0	0	100	0	8	16	400	0
2	2	0	0	0	100	0	8	16	400	0
2	2	0	0	0	100	0	8	16	400	20
2	2	0	0	0	100	0	8	16	400	20
2	2	0	0	0	100	0	8	16	400	0
2	2	0	0	0	100	0	8	16	400	0
2	2	0	0	0	75	0	8	17	425	20
2	2	0	0	0	75	0	8	17	425	0
2	2	0	0	0	75	0	8	17	425	0
2	2	0	0	0	75	0	8	17	425	20
2	2	0	0	0	75	0	8	17	425	0
2	2	0	0	0	75	0	8	17	425	0
2	2	0	0	0	100	0	8	17	425	0
2	2	0	0	0	100	0	8	17	425	0
2	2	0	0	0	100	0	8	17	425	20
2	2	0	0	0	100	0	8	17	425	20
2	2	0	0	0	100	0	8	17	425	0
2	2	0	0	0	100	0	8	17	425	0
2	2	0	0	0	75	0	8	18	450	20
2	2	0	0	0	75	0	8	18	450	0
2	2	0	0	0	75	0	8	18	450	0
2	2	0	0	0	75	0	8	18	450	20
2	2	0	0	0	75	0	8	18	450	0
2	2	0	0	0	75	0	8	18	450	0
2	2	0	0	0	100	0	8	18	450	0
2	2	0	0	0	100	0	8	18	450	0
2	2	0	0	0	100	0	8	18	450	20
2	2	0	0	0	100	0	8	18	450	20
2	2	0	0	0	100	0	8	18	450	0
2	2	0	0	0	100	0	8	18	450	0
2	2	0	0	0	75	0	8	19	475	20
2	2	0	0	0	75	0	8	19	475	0
2	2	0	0	0	75	0	8	19	475	0
2	2	0	0	0	75	0	8	19	475	20
2	2	0	0	0	75	0	8	19	475	0
2	2	0	0	0	75	0	8	19	475	0
2	2	0	0	0	100	0	8	19	475	0
2	2	0	0	0	100	0	8	19	475	0
2	2	0	0	0	100	0	8	19	475	20
2	2	0	0	0	100	0	8	19	475	20
2	2	0	0	0	100	0	8	19	475	0
2	2	0	0	0	100	0	8	19	475	0
2	2	0	0	0	75	0	8	20	500	20
2	2	0	0	0	75	0	8	20	500	0
2	2	0	0	0	75	0	8	20	500	0
2	2	0	0	0	75	0	8	20	500	20
2	2	0	0	0	75	0	8	20	500	0
2	2	0	0	0	75	0	8	20	500	0
2	2	0	0	0	100	0	8	20	500	0
2	2	0	0	0	100	0	8	20	500	0
2	2	0	0	0	100	0	8	20	500	20
2	2	0	0	0	100	0	8	20	500	20
2	2	0	0	0	100	0	8	20	500	0
2	2	0	0	0	100	0	8	20	500	0
2	2	0	1	0	75	0	8	0	0	0
2	2	0	1	0	75	0	8	0	0	0
2	2	0	1	0	75	0	8	0	0	0
2	2	0	1	0	100	0	8	0	0	0
2	2	0	1	0	100	0	8	0	0	0
2	2	0	1	0	100	0	8	0	0	0
2	3	0	1	0	75	0	8	1	24.9306	0
2	3	0	1	0	75	0	8	1	24.9306	0
2	3	0	1	0	75	0	8	1	24.9306	0
2	3	0	1	0	75	0	8	1	24.9306	0
2	3	0	1	0	75	0	8	1	24.9306	0
2	3	0	1	0	75	0	8	1	24.9306	0
2	3	0	1	0	100	0	8	1	24.9306	0
2	3	0	1	0	100	0	8	1	24.9306	0
2	3	0	1	0	100	0	8	1	24.9306	0
2	3	0	1	0	100	0	8	1	24.9306	0
2	3	0	1	0	100	0	8	1	24.9306	0
2	3	0	1	0	100	0	8	1	24.9306	0
2	3	0	1	0	75	0	8	2	49.9306	0
2	3	0	1	0	75	0	8	2	49.9306	0
2	3	0	1	0	75	0	8	2	49.9306	0
2	3	0	1	0	75	0	8	2	49.9306	0
2	3	0	1	0	75	0	8	2	49.9306	0
2	3	0	1	0	75	0	8	2	49.9306	0
2	3	0	1	0	100	0	8	2	49.9306	0
2	3	0	1	0	100	0	8	2	49.9306	0
2	3	0	1	0	100	0	8	2	49.9306	0
2	3	0	1	0	100	0	8	2	49.9306	0
2	3	0	1	0	100	0	8	2	49.9306	0
2	3	0	1	0	100	0	8	2	49.9306	0
2	3	0	1	0	75	0	8	3	74.9306	0
2	3	0	1	0	75	0	8	3	74.9306	0
2	3	0	1	0	75	0	8	3	74.9306	0
2	3	0	1	0	75	0	8	3	74.9306	0
2	3	0	1	0	75	0	8	3	74.9306	0
2	3	0	1	0	75	0	8	3	74.9306	0
2	3	0	1	0	100	0	8	3	74.9306	0
2	3	0	1	0	100	0	8	3	74.9306	0
2	3	0	1	0	100	0	8	3	74.9306	0
2	3	0	1	0	100	0	8	3	74.9306	20
2	3	0	1	0	100	0	8	3	74.9306	0
2	3	0	1	0	100	0	8	3	74.9306	0
2	3	0	1	0	75	0	8	4	99.9306	0
2	3	0	1	0	75	0	8	4	99.9306	0
2	3	0	1	0	75	0	8	4	99.9306	0
2	3	0	1	0	75	0	8	4	99.9306	0
2	3	0	1	0	75	0	8	4	99.9306	0
2	3	0	1	0	75	0	8	4	99.9306	0
2	3	0	1	0	100	0	8	4	99.9306	0
2	3	0	1	0	100	0	8	4	99.9306	0
2	3	0	1	0	100	0	8	4	99.9306	0
2	3	0	1	0	100	0	8	4	99.9306	20
2	3	0	1	0	100	0	8	4	99.9306	0
2	3	0	1	0	100	0	8	4	99.9306	0
2	3	0	1	0	75	0	8	5	124.931	0
2	3	0	1	0	75	0	8	5	124.931	0
2	3	0	1	0	75	0	8	5	124.931	0
2	3	0	1	0	75	0	8	5	124.931	0
2	3	0	1	0	75	0	8	5	124.931	0
2	3	0	1	0	75	0	8	5	124.931	0
2	3	0	1	0	100	0	8	5	124.931	0
2	3	0	1	0	100	0	8	5	124.931	0
2	3	0	1	0	100	0	8	5	124.931	0
2	3	0	1	0	100	0	8	5	124.931	20
2	3	0	1	0	100	0	8	5	124.931	0
2	3	0	1	0	100	0	8	5	124.931	0
2	3	0	1	0	75	0	8	6	149.931	0
2	3	0	1	0	75	0	8	6	149.931	0
2	3	0	1	0	75	0	8	6	149.931	0
2	3	0	1	0	75	0	8	6	149.931	0
2	3	0	1	0	75	0	8	6	149.931	0
2	3	0	1	0	75	0	8	6	149.931	0
2	3	0	1	0	100	0	8	6	149.931	0
2	3	0	1	0	100	0	8	6	149.931	0
2	3	0	1	0	100	0	8	6	149.931	0
2	3	0	1	0	100	0	8	6	149.931	20
2	3	0	1	0	100	0	8	6	149.931	0
2	3	0	1	0	100	0	8	6	149.931	0
2	3	0	1	0	75	0	8	7	174.931	20
2	3	0	1	0	75	0	8	7	174.931	0
2	3	0	1	0	75	0	8	7	174.931	0
2	3	0	1	0	75	0	8	7	174.931	0
2	3	0	1	0	75	0	8	7	174.931	20
2	3	0	1	0	75	0	8	7	174.931	0
2	3	0	1	0	100	0	8	7	174.931	0
2	3	0	1	0	100	0	8	7	174.931	0
2	3	0	1	0	100	0	8	7	174.931	0
2	3	0	1	0	100	0	8	7	174.931	20
2	3	0	1	0	100	0	8	7	174.931	0
2	3	0	1	0	100	0	8	7	174.931	0
2	3	0	1	0	75	0	8	8	199.931	20
2	3	0	1	0	75	0	8	8	199.931	0
2	3	0	1	0	75	0	8	8	199.931	0
2	3	0	1	0	75	0	8	8	199.931	0
2	3	0	1	0	75	0	8	8	199.931	20
2	3	0	1	0	75	0	8	8	199.931	0
2	3	0	1	0	100	0	8	8	199.931	0
2	3	0	1	0	100	0	8	8	199.931	0
2	3	0	1	0	100	0	8	8	199.931	0
2	3	0	1	0	100	0	8	8	199.931	20
2	3	0	1	0	100	0	8	8	199.931	0
2	3	0	1	0	100	0	8	8	199.931	0
2	3	0	1	0	75	0	8	9	224.931	20
2	3	0	1	0	75	0	8	9	224.931	0
2	3	0	1	0	75	0	8	9	224.931	0
2	3	0	1	0	75	0	8	9	224.931	0
2	3	0	1	0	75	0	8	9	224.931	20
2	3	0	1	0	75	0	8	9	224.931	0
2	3	0	1	0	100	0	8	9	224.931	0
2	3	0	1	0	100	0	8	9	224.931	0
2	3	0	1	0	100	0	8	9	224.931	0
2	3	0	1	0	100	0	8	9	224.931	20
2	3	0	1	0	100	0	8	9	224.931	0
2	3	0	1	0	100	0	8	9	224.931	0
2	3	0	1	0	75	0	8	10	249.931	20
2	3	0	1	0	75	0	8	10	249.931	0
2	3	0	1	0	75	0	8	10	249.931	0
2	3	0	1	0	75	0	8	10	249.931	0
2	3	0	1	0	75	0	8	10	249.931	20
2	3	0	1	0	75	0	8	10	249.931	0
2	3	0	1	0	100	0	8	10	249.931	0
2	3	0	1	0	100	0	8	10	249.931	0
2	3	0	1	0	100	0	8	10	249.931	0
2	3	0	1	0	100	0	8	10	249.931	20
2	3	0	1	0	100	0	8	10	249.931	0
2	3	0	1	0	100	0	8	10	249.931	0
2	3	0	1	0	75	0	8	11	274.931	20
2	3	0	1	0	75	0	8	11	274.931	0
2	3	0	1	0	75	0	8	11	274.931	0
2	3	0	1	0	75	0	8	11	274.931	0
2	3	0	1	0	75	0	8	11	274.931	20
2	3	0	1	0	75	0	8	11	274.931	0
2	7	0	1	0	100	0	8	11	274.931	0
2	7	0	1	0	100	0	8	11	274.931	0
2	7	0	1	0	100	0	8	11	274.931	0
2	7	0	1	0	100	0	8	11	274.931	20
2	7	0	1	0	100	0	8	11	274.931	0
2	7	0	1	0	100	0	8	11	274.931	0
2	7	0	1	0	75	0	8	12	299.931	20
2	7	0	1	0	75	0	8	12	299.931	0
2	7	0	1	0	75	0	8	12	299.931	0
2	7	0	1	0	75	0	8	12	299.931	0
2	7	0	1	0	75	0	8	12	299.931	20
2	7	0	1	0	75	0	8	12	299.931	0
2	7	0	1	0	100	0	8	12	299.931	0
2	7	0	1	0	100	0	8	12	299.931	0
2	7	0	1	0	100	0	8	12	299.931	0
2	7	0	1	0	100	0	8	12	299.931	20
2	7	0	1	0	100	0	8	12	299.931	0
2	7	0	1	0	100	0	8	12	299.931	0
2	7	0	1	0	75	0	8	13	324.931	20
2	7	0	1	0	75	0	8	13	324.931	0
2	7	0	1	0	75	0	8	13	324.931	0
2	7	0	1	0	75	0	8	13	324.931	0
2	7	0	1	0	75	0	8	13	324.931	20
2	7	0	1	0	75	0	8	13	324.931	0
2	7	0	1	0	100	0	8	13	324.931	0
2	7	0	1	0	100	0	8	13	324.931	0
2	7	0	1	0	100	0	8	13	324.931	0
2	7	0	1	0	100	0	8	13	324.931	20
2	7	0	1	0	100	0	8	13	324.931	0
2	7	0	1	0	100	0	8	13	324.931	0
2	7	0	1	0	75	0	8	14	349.931	20
2	7	0	1	0	75	0	8	14	349.931	0
2	7	0	1	0	75	0	8	14	349.931	0
2	7	0	1	0	75	0	8	14	349.931	0
2	7	0	1	0	75	0	8	14	349.931	20
2	7	0	1	0	75	0	8	14	349.931	0
2	7	0	1	0	100	0	8	14	349.931	0
2	7	0	1	0	100	0	8	14	349.931	0
2	7	0	1	0	100	0	8	14	349.931	0
2	7	0	1	0	100	0	8	14	349.931	20
2	7	0	1	0	100	0	8	14	349.931	0
2	7	0	1	0	100	0	8	14	349.931	0
2	7	0	1	0	75	0	8	15	374.931	20
2	7	0	1	0	75	0	8	15	374.931	0
2	7	0	1	0	75	0	8	15	374.931	0
2	7	0	1	0	75	0	8	15	374.931	0
2	7	0	1	0	75	0	8	15	374.931	20
2	7	0	1	0	75	0	8	15	374.931	0
2	7	0	1	0	100	0	8	15	374.931	0
2	7	0	1	0	100	0	8	15	374.931	0
2	7	0	1	0	100	0	8	15	374.931	0
2	7	0	1	0	100	0	8	15	374.931	20
2	7	0	1	0	100	0	8	15	374.931	0
2	7	0	1	0	100	0	8	15	374.931	0
2	7	0	1	0	75	0	8	16	399.931	20
2	7	0	1	0	75	0	8	16	399.931	0
2	7	0	1	0	75	0	8	16	399.931	0
2	7	0	1	0	75	0	8	16	399.931	0
2	7	0	1	0	75	0	8	16	399.931	20
2	7	0	1	0	75	0	8	16	399.931	0
2	7	0	1	0	100	0	8	16	399.931	0
2	7	0	1	0	100	0	8	16	399.931	0
2	7	0	1	0	100	0	8	16	399.931	0
2	7	0	1	0	100	0	8	16	399.931	20
2	7	0	1	0	100	0	8	16	399.931	0
2	7	0	1	0	100	0	8	16	399.931	0
2	7	0	1	0	75	0	8	17	424.931	20
2	7	0	1	0	75	0	8	17	424.931	0
2	7	0	1	0	75	0	8	17	424.931	0
2	7	0	1	0	75	0	8	17	424.931	0
2	7	0	1	0	75	0	8	17	424.931	20
2	7	0	1	0	75	0	8	17	424.931	0
2	7	0	1	0	100	0	8	17	424.931	0
2	7	0	1	0	100	0	8	17	424.931	0
2	7	0	1	0	100	0	8	17	424.931	0
2	7	0	1	0	100	0	8	17	424.931	20
2	7	0	1	0	100	0	8	17	424.931	0
2	7	0	1	0	100	0	8	17	424.931	0
2	7	0	1	0	75	0	8	18	449.931	20
2	7	0	1	0	75	0	8	18	449.931	0
2	7	0	1	0	75	0	8	18	449.931	0
2	7	0	1	0	75	0	8	18	449.931	0
2	7	0	1	0	75	0	8	18	449.931	20
2	7	0	1	0	75	0	8	18	449.931	0
2	7	0	1	0	100	0	8	18	449.931	0
2	7	0	1	0	100	0	8	18	449.931	0
2	7	0	1	0	100	0	8	18	449.931	0
2	7	0	1	0	100	0	8	18	449.931	20
2	7	0	1	0	100	0	8	18	449.931	0
2	7	0	1	0	100	0	8	18	449.931	0
2	7	0	1	0	75	0	8	19	474.931	20
2	7	0	1	0	75	0	8	19	474.931	0
2	7	0	1	0	75	0	8	19	474.931	0
2	7	0	1	0	75	0	8	19	474.931	0
2	7	0	1	0	75	0	8	19	474.931	20
2	7	0	1	0	75	0	8	19	474.931	0
2	7	0	1	0	100	0	8	19	474.931	0
2	7	0	1	0	100	0	8	19	474.931	0
2	7	0	1	0	100	0	8	19	474.931	0
2	7	0	1	0	100	0	8	19	474.931	20
2	7	0	1	0	100	0	8	19	474.931	0
2	7	0	1	0	100	0	8	19	474.931	0
2	7	0	1	0	75	0	8	20	499.931	20
2	7	0	1	0	75	0	8	20	499.931	0
2	7	0	1	0	75	0	8	20	499.931	0
2	7	0	1	0	75	0	8	20	499.931	0
2	7	0	1	0	75	0	8	20	499.931	20
2	7	0	1	0	75	0	8	20	499.931	0
2	7	0	1	0	100	0	8	20	499.931	0
2	7	0	1	0	100	0	8	20	499.931	0
2	7	0	1	0	100	0	8	20	499.931	0
2	7	0	1	0	100	0	8	20	499.931	20
2	7	0	1	0	100	0	8	20	499.931	0
2	7	0	1	0	100	0	8	20	499.931	0
2	7	0	1	3	75	3	7	0	0	0
2	7	0	1	3	75	3	7	0	0	0
2	7	0	1	3	75	3	7	0	0	0
2	7	0	1	3	100	3	7	0	0	0
2	7	0	1	3	100	3	7	0	0	0
2	7	0	1	3	100	3	7	0	0	0
2	7	0	1	3	75	3	7	1	4.07639	0
2	7	0	1	3	75	3	7	1	4.07639	0
2	7	0	1	3	75	3	7	1	4.07639	0
2	7	0	1	3	75	3	7	1	4.07639	0
2	7	0	1	3	75	3	7	1	4.07639	0
2	7	0	1	3	75	3	7	1	4.07639	0
2	5	0	1	3	100	3	7	1	4.07639	0
2	5	0	1	3	100	3	7	1	4.07639	0
2	5	0	1	3	100	3	7	1	4.07639	0
2	5	0	1	3	100	3	7	1	4.07639	0
2	5	0	1	3	100	3	7	1	4.07639	0
2	5	0	1	3	100	3	7	1	4.07639	0
2	5	0	1	3	75	3	7	2	8.07639	0
2	5	0	1	3	75	3	7	2	8.07639	0
2	5	0	1	3	75	3	7	2	8.07639	0
2	5	0	1	3	75	3	7	2	8.07639	0
2	5	0	1	3	75	3	7	2	8.07639	0
2	5	0	1	3	75	3	7	2	8.07639	0
2	5	0	1	3	100	3	7	2	8.07639	0
2	5	0	1	3	100	3	7	2	8.07639	0
2	5	0	1	3	100	3	7	2	8.07639	0
2	5	0	1	3	100	3	7	2	8.07639	0
2	5	0	1	3	100	3	7	2	8.07639	0
2	5	0	1	3	100	3	7	2	8.07639	0
2	5	0	1	3	75	3	7	3	12.0764	0
2	5	0	1	3	75	3	7	3	12.0764	0
2	5	0	1	3	75	3	7	3	12.0764	0
2	5	0	1	3	75	3	7	3	12.0764	0
2	5	0	1	3	75	3	7	3	12.0764	0
2	5	0	1	3	75	3	7	3	12.0764	0
2	5	0	1	3	100	3	7	3	12.0764	0
2	5	0	1	3	100	3	7	3	12.0764	0
2	5	0	1	3	100	3	7	3	12.0764	0
2	5	0	1	3	100	3	7	3	12.0764	0
2	5	0	1	3	100	3	7	3	12.0764	0
2	5	0	1	3	100	3	7	3	12.0764	0
2	5	0	1	3	75	3	7	4	37.0069	0
2	5	0	1	3	75	3	7	4	37.0069	0
2	5	0	1	3	75	3	7	4	37.0069	0
2	5	0	1	3	75	3	7	4	37.0069	0
2	5	0	1	3	75	3	7	4	37.0069	0
2	5	0	1	3	75	3	7	4	37.0069	0
2	5	0	1	3	100	3	7	4	37.0069	0
2	5	0	1	3	100	3	7	4	37.0069	0
2	5	0	1	3	100	3	7	4	37.0069	0
2	5	0	1	3	100	3	7	4	37.0069	0
2	5	0	1	3	100	3	7	4	37.0069	0
2	5	0	1	3	100	3	7	4	37.0069	0
2	5	0	1	3	75	3	7	5	62.0069	0
2	5	0	1	3	75	3	7	5	62.0069	0
2	5	0	1	3	75	3	7	5	62.0069	0
2	5	0	1	3	75	3	7	5	62.0069	0
2	5	0	1	3	75	3	7	5	62.0069	0
2	5	0	1	3	75	3	7	5	62.0069	0
2	5	0	1	3	100	3	7	5	62.0069	0
2	5	0	1	3	100	3	7	5	62.0069	0
2	5	0	1	3	100	3	7	5	62.0069	0
2	5	0	1	3	100	3	7	5	62.0069	0
2	5	0	1	3	100	3	7	5	62.0069	0
2	5	0	1	3	100	3	7	5	62.0069	0
2	5	0	1	3	75	3	7	6	87.0069	0
2	5	0	1	3	75	3	7	6	87.0069	0
2	5	0	1	3	75	3	7	6	87.0069	0
2	5	0	1	3	75	3	7	6	87.0069	0
2	5	0	1	3	75	3	7	6	87.0069	0
2	5	0	1	3	75	3	7	6	87.0069	0
2	5	0	1	3	100	3	7	6	87.0069	0
2	5	0	1	3	100	3	7	6	87.0069	0
2	5	0	1	3	100	3	7	6	87.0069	0
2	5	0	1	3	100	3	7	6	87.0069	0
2	5	0	1	3	100	3	7	6	87.0069	0
2	5	0	1	3	100	3	7	6	87.0069	0
2	5	0	1	3	75	3	7	7	112.007	0
2	5	0	1	3	75	3	7	7	112.007	0
2	5	0	1	3	75	3	7	7	112.007	0
2	5	0	1	3	75	3	7	7	112.007	0
2	5	0	1	3	75	3	7	7	112.007	0
2	5	0	1	3	75	3	7	7	112.007	20
2	5	0	1	3	100	3	7	7	112.007	0
2	5	0	1	3	100	3	7	7	112.007	0
2	5	0	1	3	100	3	7	7	112.007	0
2	5	0	1	3	100	3	7	7	112.007	0
2	5	0	1	3	100	3	7	7	112.007	0
2	5	0	1	3	100	3	7	7	112.007	0
2	5	0	1	3	75	3	7	8	137.007	0
2	5	0	1	3	75	3	7	8	137.007	0
2	5	0	1	3	75	3	7	8	137.007	0
2	5	0	1	3	75	3	7	8	137.007	0
2	5	0	1	3	75	3	7	8	137.007	0
2	5	0	1	3	75	3	7	8	137.007	20
2	5	0	1	3	100	3	7	8	137.007	0
2	5	0	1	3	100	3	7	8	137.007	0
2	5	0	1	3	100	3	7	8	137.007	0
2	5	0	1	3	100	3	7	8	137.007	0
2	5	0	1	3	100	3	7	8	137.007	0
2	5	0	1	3	100	3	7	8	137.007	0
2	5	0	1	3	75	3	7	9	162.007	0
2	5	0	1	3	75	3	7	9	162.007	0
2	5	0	1	3	75	3	7	9	162.007	0
2	5	0	1	3	75	3	7	9	162.007	0
2	5	0	1	3	75	3	7	9	162.007	0
2	5	0	1	3	75	3	7	9	162.007	20
2	5	0	1	3	100	3	7	9	162.007	0
2	5	0	1	3	100	3	7	9	162.007	0
2	5	0	1	3	100	3	7	9	162.007	0
2	5	0	1	3	100	3	7	9	162.007	20
2	5	0	1	3	100	3	7	9	162.007	20
2	5	0	1	3	100	3	7	9	162.007	0
2	5	0	1	3	75	3	7	10	187.007	0
2	5	0	1	3	75	3	7	10	187.007	0
2	5	0	1	3	75	3	7	10	187.007	0
2	5	0	1	3	75	3	7	10	187.007	0
2	5	0	1	3	75	3	7	10	187.007	0
2	5	0	1	3	75	3	7	10	187.007	20
2	5	0	1	3	100	3	7	10	187.007	0
2	5	0	1	3	100	3	7	10	187.007	0
2	5	0	1	3	100	3	7	10	187.007	0
2	5	0	1	3	100	3	7	10	187.007	20
2	5	0	1	3	100	3	7	10	187.007	20
2	5	0	1	3	100	3	7	10	187.007	0
2	5	0	1	3	75	3	7	11	212.007	0
2	5	0	1	3	75	3	7	11	212.007	0
2	5	0	1	3	75	3	7	11	212.007	0
2	5	0	1	3	75	3	7	11	212.007	0
2	5	0	1	3	75	3	7	11	212.007	0
2	5	0	1	3	75	3	7	11	212.007	20
2	5	0	1	3	100	3	7	11	212.007	0
2	5	0	1	3	100	3	7	11	212.007	0
2	5	0	1	3	100	3	7	11	212.007	0
2	5	0	1	3	100	3	7	11	212.007	20
2	5	0	1	3	100	3	7	11	212.007	20
2	5	0	1	3	100	3	7	11	212.007	0
2	8	0	1	3	75	3	7	12	237.007	0
2	8	0	1	3	75	3	7	12	237.007	0
2	8	0	1	3	75	3	7	12	237.007	0
2	8	0	1	3	75	3	7	12	237.007	0
2	8	0	1	3	75	3	7	12	237.007	0
2	8	0	1	3	75	3	7	12	237.007	20
2	8	0	1	3	100	3	7	12	237.007	0
2	8	0	1	3	100	3	7	12	237.007	0
2	8	0	1	3	100	3	7	12	237.007	0
2	8	0	1	3	100	3	7	12	237.007	20
2	8	0	1	3	100	3	7	12	237.007	20
2	8	0	1	3	100	3	7	12	237.007	0
2	8	0	1	3	75	3	7	13	262.007	0
2	8	0	1	3	75	3	7	13	262.007	0
2	8	0	1	3	75	3	7	13	262.007	0
2	8	0	1	3	75	3	7	13	262.007	0
2	8	0	1	3	75	3	7	13	262.007	0
2	8	0	1	3	75	3	7	13	262.007	20
2	8	0	1	3	100	3	7	13	262.007	0
2	8	0	1	3	100	3	7	13	262.007	0
2	8	0	1	3	100	3	7	13	262.007	0
2	8	0	1	3	100	3	7	13	262.007	20
2	8	0	1	3	100	3	7	13	262.007	20
2	8	0	1	3	100	3	7	13	262.007	0
2	8	0	1	3	75	3	7	14	287.007	0
2	8	0	1	3	75	3	7	14	287.007	0
2	8	0	1	3	75	3	7	14	287.007	0
2	8	0	1	3	75	3	7	14	287.007	0
2	8	0	1	3	75	3	7	14	287.007	0
2	8	0	1	3	75	3	7	14	287.007	20
2	8	0	1	3	100	3	7	14	287.007	0
2	8	0	1	3	100	3	7	14	287.007	0
2	8	0	1	3	100	3	7	14	287.007	0
2	8	0	1	3	100	3	7	14	287.007	20
2	8	0	1	3	100	3	7	14	287.007	20
2	8	0	1	3	100	3	7	14	287.007	0
2	8	0	1	3	75	3	7	15	312.007	0
2	8	0	1	3	75	3	7	15	312.007	0
2	8	0	1	3	75	3	7	15	312.007	0
2	8	0	1	3	75	3	7	15	312.007	0
2	8	0	1	3	75	3	7	15	312.007	0
2	8	0	1	3	75	3	7	15	312.007	20
2	8	0	1	3	100	3	7	15	312.007	0
2	8	0	1	3	100	3	7	15	312.007	0
2	8	0	1	3	100	3	7	15	312.007	0
2	8	0	1	3	100	3	7	15	312.007	20
2	8	0	1	3	100	3	7	15	312.007	20
2	8	0	1	3	100	3	7	15	312.007	0
2	8	0	1	3	75	3	7	16	337.007	0
2	8	0	1	3	75	3	7	16	337.007	0
2	8	0	1	3	75	3	7	16	337.007	0
2	8	0	1	3	75	3	7	16	337.007	0
2	8	0	1	3	75	3	7	16	337.007	0
2	8	0	1	3	75	3	7	16	337.007	20
2	8	0	1	3	100	3	7	16	337.007	0
2	8	0	1	3	100	3	7	16	337.007	0
2	8	0	1	3	100	3	7	16	337.007	0
2	8	0	1	3	100	3	7	16	337.007	20
2	8	0	1	3	100	3	7	16	337.007	20
2	8	0	1	3	100	3	7	16	337.007	0
2	8	0	1	3	75	3	7	17	362.007	0
2	8	0	1	3	75	3	7	17	362.007	0
2	8	0	1	3	75	3	7	17	362.007	0
2	8	0	1	3	75	3	7	17	362.007	0
2	8	0	1	3	75	3	7	17	362.007	0
2	8	0	1	3	75	3	7	17	362.007	20
2	8	0	1	3	100	3	7	17	362.007	0
2	8	0	1	3	100	3	7	17	362.007	0
2	8	0	1	3	100	3	7	17	362.007	0
2	8	0	1	3	100	3	7	17	362.007	20
2	8	0	1	3	100	3	7	17	362.007	20
2	8	0	1	3	100	3	7	17	362.007	0
2	8	0	1	3	75	3	7	18	387.007	0
2	8	0	1	3	75	3	7	18	387.007	0
2	8	0	1	3	75	3	7	18	387.007	0
2	8	0	1	3	75	3	7	18	387.007	0
2	8	0	1	3	75	3	7	18	387.007	0
2	8	0	1	3	75	3	7	18	387.007	20
2	8	0	1	3	100	3	7	18	387.007	0
2	8	0	1	3	100	3	7	18	387.007	0
2	8	0	1	3	100	3	7	18	387.007	0
2	8	0	1	3	100	3	7	18	387.007	20
2	8	0	1	3	100	3	7	18	387.007	20
2	8	0	1	3	100	3	7	18	387.007	0
2	8	0	1	3	75	3	7	19	412.007	0
2	8	0	1	3	75	3	7	19	412.007	0
2	8	0	1	3	75	3	7	19	412.007	0
2	8	0	1	3	75	3	7	19	412.007	0
2	8	0	1	3	75	3	7	19	412.007	0
2	8	0	1	3	75	3	7	19	412.007	20
2	8	0	1	3	100	3	7	19	412.007	0
2	8	0	1	3	100	3	7	19	412.007	0
2	8	0	1	3	100	3	7	19	412.007	0
2	8	0	1	3	100	3	7	19	412.007	20
2	8	0	1	3	100	3	7	19	412.007	20
2	8	0	1	3	100	3	7	19	412.007	0
2	8	0	1	3	75	3	7	20	437.007	0
2	8	0	1	3	75	3	7	20	437.007	20
2	8	0	1	3	75	3	7	20	437.007	0
2	8	0	1	3	75	3	7	20	437.007	0
2	8	0	1	3	75	3	7	20	437.007	0
2	8	0	1	3	75	3	7	20	437.007	20
2	8	0	1	3	100	3	7	20	437.007	0
2	8	0	1	3	100	3	7	20	437.007	0
2	8	0	1	3	100	3	7	20	437.007	0
2	8	0	1	3	100	3	7	20	437.007	20
2	8	0	1	3	100	3	7	20	437.007	20
2	8	0	1	3	100	3	7	20	437.007	0
2	8	0	1	10	75	10	6	0	0	0
2	8	0	1	10	75	10	6	0	0	0
2	8	0	1	10	75	10	6	0	0	0
2	8	0	1	10	100	10	6	0	0	0
2	8	0	1	10	100	10	6	0	0	0
2	8	0	1	10	100	10	6	0	0	0
2	8	0	1	10	75	10	6	1	4.07639	0
2	8	0	1	10	75	10	6	1	4.07639	0
2	8	0	1	10	75	10	6	1	4.07639	0
2	8	0	1	10	75	10	6	1	4.07639	0
2	8	0	1	10	75	10	6	1	4.07639	0
2	8	0	1	10	75	10	6	1	4.07639	0
2	8	0	1	10	100	10	6	1	4.07639	0
2	8	0	1	10	100	10	6	1	4.07639	0
2	8	0	1	10	100	10	6	1	4.07639	0
2	8	0	1	10	100	10	6	1	4.07639	0
2	8	0	1	10	100	10	6	1	4.07639	0
2	8	0	1	10	100	10	6	1	4.07639	0
2	4	0	1	10	75	10	6	2	8.07639	0
2	4	0	1	10	75	10	6	2	8.07639	0
2	4	0	1	10	75	10	6	2	8.07639	0
2	4	0	1	10	75	10	6	2	8.07639	0
2	4	0	1	10	75	10	6	2	8.07639	0
2	4	0	1	10	75	10	6	2	8.07639	0
2	4	0	1	10	100	10	6	2	8.07639	0
2	4	0	1	10	100	10	6	2	8.07639	0
2	4	0	1	10	100	10	6	2	8.07639	0
2	4	0	1	10	100	10	6	2	8.07639	0
2	4	0	1	10	100	10	6	2	8.07639	0
2	4	0	1	10	100	10	6	2	8.07639	0
2	4	0	1	10	75	10	6	3	12.0764	0
2	4	0	1	10	75	10	6	3	12.0764	0
2	4	0	1	10	75	10	6	3	12.0764	0
2	4	0	1	10	75	10	6	3	12.0764	0
2	4	0	1	10	75	10	6	3	12.0764	0
2	4	0	1	10	75	10	6	3	12.0764	0
2	4	0	1	10	100	10	6	3	12.0764	0
2	4	0	1	10	100	10	6	3	12.0764	0
2	4	0	1	10	100	10	6	3	12.0764	0
2	4	0	1	10	100	10	6	3	12.0764	0
2	4	0	1	10	100	10	6	3	12.0764	0
2	4	0	1	10	100	10	6	3	12.0764	0
2	4	0	1	10	75	10	6	4	16.0764	0
2	4	0	1	10	75	10	6	4	16.0764	0
2	4	0	1	10	75	10	6	4	16.0764	0
2	4	0	1	10	75	10	6	4	16.0764	0
2	4	0	1	10	75	10	6	4	16.0764	0
2	4	0	1	10	75	10	6	4	16.0764	0
2	4	0	1	10	100	10	6	4	16.0764	0
2	4	0	1	10	100	10	6	4	16.0764	0
2	4	0	1	10	100	10	6	4	16.0764	0
2	4	0	1	10	100	10	6	4	16.0764	0
2	4	0	1	10	100	10	6	4	16.0764	0
2	4	0	1	10	100	10	6	4	16.0764	0
2	4	0	1	10	75	10	6	5	20.0764	0
2	4	0	1	10	75	10	6	5	20.0764	0
2	4	0	1	10	75	10	6	5	20.0764	0
2	4	0	1	10	75	10	6	5	20.0764	0
2	4	0	1	10	75	10	6	5	20.0764	0
2	4	0	1	10	75	10	6	5	20.0764	0
2	4	0	1	10	100	10	6	5	20.0764	0
2	4	0	1	10	100	10	6	5	20.0764	0
2	4	0	1	10	100	10	6	5	20.0764	0
2	4	0	1	10	100	10	6	5	20.0764	0
2	4	0	1	10	100	10	6	5	20.0764	0
2	4	0	1	10	100	10	6	5	20.0764	0
2	4	0	1	10	75	10	6	6	24.0764	0
2	4	0	1	10	75	10	6	6	24.0764	0
2	4	0	1	10	75	10	6	6	24.0764	0
2	4	0	1	10	75	10	6	6	24.0764	0
2	4	0	1	10	75	10	6	6	24.0764	0
2	4	0	1	10	75	10	6	6	24.0764	0
2	4	0	1	10	100	10	6	6	24.0764	0
2	4	0	1	10	100	10	6	6	24.0764	0
2	4	0	1	10	100	10	6	6	24.0764	0
2	4	0	1	10	100	10	6	6	24.0764	0
2	4	0	1	10	100	10	6	6	24.0764	0
2	4	0	1	10	100	10	6	6	24.0764	0
2	4	0	1	10	75	10	6	7	28.0764	0
2	4	0	1	10	75	10	6	7	28.0764	0
2	4	0	1	10	75	10	6	7	28.0764	0
2	4	0	1	10	75	10	6	7	28.0764	0
2	4	0	1	10	75	10	6	7	28.0764	0
2	4	0	1	10	75	10	6	7	28.0764	0
2	4	0	1	10	100	10	6	7	28.0764	0
2	4	0	1	10	100	10	6	7	28.0764	0
2	4	0	1	10	100	10	6	7	28.0764	0
2	4	0	1	10	100	10	6	7	28.0764	0
2	4	0	1	10	100	10	6	7	28.0764	0
2	4	0	1	10	100	10	6	7	28.0764	0
2	4	0	1	10	75	10	6	8	32.0764	0
2	4	0	1	10	75	10	6	8	32.0764	0
2	4	0	1	10	75	10	6	8	32.0764	0
2	4	0	1	10	75	10	6	8	32.0764	0
2	4	0	1	10	75	10	6	8	32.0764	0
2	4	0	1	10	75	10	6	8	32.0764	0
2	4	0	1	10	100	10	6	8	32.0764	0
2	4	0	1	10	100	10	6	8	32.0764	0
2	4	0	1	10	100	10	6	8	32.0764	0
2	4	0	1	10	100	10	6	8	32.0764	0
2	4	0	1	10	100	10	6	8	32.0764	0
2	4	0	1	10	100	10	6	8	32.0764	0
2	4	0	1	10	75	10	6	9	36.0764	0
2	4	0	1	10	75	10	6	9	36.0764	0
2	4	0	1	10	75	10	6	9	36.0764	0
2	4	0	1	10	75	10	6	9	36.0764	0
2	4	0	1	10	75	10	6	9	36.0764	0
2	4	0	1	10	75	10	6	9	36.0764	0
2	4	0	1	10	100	10	6	9	36.0764	0
2	4	0	1	10	100	10	6	9	36.0764	0
2	4	0	1	10	100	10	6	9	36.0764	0
2	4	0	1	10	100	10	6	9	36.0764	0
2	4	0	1	10	100	10	6	9	36.0764	0
2	4	0	1	10	100	10	6	9	36.0764	0
2	4	0	1	10	75	10	6	10	40.0764	0
2	4	0	1	10	75	10	6	10	40.0764	0
2	4	0	1	10	75	10	6	10	40.0764	0
2	4	0	1	10	75	10	6	10	40.0764	0
2	4	0	1	10	75	10	6	10	40.0764	0
2	4	0	1	10	75	10	6	10	40.0764	0
2	4	0	1	10	100	10	6	10	40.0764	0
2	4	0	1	10	100	10	6	10	40.0764	0
2	4	0	1	10	100	10	6	10	40.0764	0
2	4	0	1	10	100	10	6	10	40.0764	0
2	4	0	1	10	100	10	6	10	40.0764	0
2	4	0	1	10	100	10	6	10	40.0764	0
2	4	0	1	10	75	10	6	11	65.0764	0
2	4	0	1	10	75	10	6	11	65.0764	0
2	4	0	1	10	75	10	6	11	65.0764	0
2	4	0	1	10	75	10	6	11	65.0764	0
2	4	0	1	10	75	10	6	11	65.0764	0
2	4	0	1	10	75	10	6	11	65.0764	0
2	4	0	1	10	100	10	6	11	65.0764	0
2	4	0	1	10	100	10	6	11	65.0764	0
2	4	0	1	10	100	10	6	11	65.0764	0
2	4	0	1	10	100	10	6	11	65.0764	0
2	4	0	1	10	100	10	6	11	65.0764	0
2	4	0	1	10	100	10	6	11	65.0764	0
2	4	0	1	10	75	10	6	12	90.0764	0
2	4	0	1	10	75	10	6	12	90.0764	0
2	4	0	1	10	75	10	6	12	90.0764	0
2	4	0	1	10	75	10	6	12	90.0764	0
2	4	0	1	10	75	10	6	12	90.0764	0
2	4	0	1	10	75	10	6	12	90.0764	0
2	6	0	1	10	100	10	6	12	90.0764	0
2	6	0	1	10	100	10	6	12	90.0764	0
2	6	0	1	10	100	10	6	12	90.0764	0
2	6	0	1	10	100	10	6	12	90.0764	0
2	6	0	1	10	100	10	6	12	90.0764	0
2	6	0	1	10	100	10	6	12	90.0764	0
2	6	0	1	10	75	10	6	13	115.076	0
2	6	0	1	10	75	10	6	13	115.076	0
2	6	0	1	10	75	10	6	13	115.076	0
2	6	0	1	10	75	10	6	13	115.076	0
2	6	0	1	10	75	10	6	13	115.076	0
2	6	0	1	10	75	10	6	13	115.076	0
2	6	0	1	10	100	10	6	13	115.076	0
2	6	0	1	10	100	10	6	13	115.076	0
2	6	0	1	10	100	10	6	13	115.076	0
2	6	0	1	10	100	10	6	13	115.076	0
2	6	0	1	10	100	10	6	13	115.076	0
2	6	0	1	10	100	10	6	13	115.076	0
2	6	0	1	10	75	10	6	14	140.076	0
2	6	0	1	10	75	10	6	14	140.076	0
2	6	0	1	10	75	10	6	14	140.076	0
2	6	0	1	10	75	10	6	14	140.076	0
2	6	0	1	10	75	10	6	14	140.076	0
2	6	0	1	10	75	10	6	14	140.076	0
2	6	0	1	10	100	10	6	14	140.076	0
2	6	0	1	10	100	10	6	14	140.076	0
2	6	0	1	10	100	10	6	14	140.076	0
2	6	0	1	10	100	10	6	14	140.076	0
2	6	0	1	10	100	10	6	14	140.076	0
2	6	0	1	10	100	10	6	14	140.076	20
2	6	0	1	10	75	10	6	15	165.076	0
2	6	0	1	10	75	10	6	15	165.076	0
2	6	0	1	10	75	10	6	15	165.076	0
2	6	0	1	10	75	10	6	15	165.076	0
2	6	0	1	10	75	10	6	15	165.076	0
2	6	0	1	10	75	10	6	15	165.076	0
2	6	0	1	10	100	10	6	15	165.076	0
2	6	0	1	10	100	10	6	15	165.076	0
2	6	0	1	10	100	10	6	15	165.076	0
2	6	0	1	10	100	10	6	15	165.076	0
2	6	0	1	10	100	10	6	15	165.076	20
2	6	0	1	10	100	10	6	15	165.076	20
2	6	0	1	10	75	10	6	16	190.076	0
2	6	0	1	10	75	10	6	16	190.076	0
2	6	0	1	10	75	10	6	16	190.076	0
2	6	0	1	10	75	10	6	16	190.076	0
2	6	0	1	10	75	10	6	16	190.076	0
2	6	0	1	10	75	10	6	16	190.076	0
2	6	0	1	10	100	10	6	16	190.076	0
2	6	0	1	10	100	10	6	16	190.076	0
2	6	0	1	10	100	10	6	16	190.076	0
2	6	0	1	10	100	10	6	16	190.076	0
2	6	0	1	10	100	10	6	16	190.076	20
2	6	0	1	10	100	10	6	16	190.076	20
2	6	0	1	10	75	10	6	17	215.076	0
2	6	0	1	10	75	10	6	17	215.076	0
2	6	0	1	10	75	10	6	17	215.076	0
2	6	0	1	10	75	10	6	17	215.076	0
2	6	0	1	10	75	10	6	17	215.076	0
2	6	0	1	10	75	10	6	17	215.076	0
2	6	0	1	10	100	10	6	17	215.076	0
2	6	0	1	10	100	10	6	17	215.076	0
2	6	0	1	10	100	10	6	17	215.076	0
2	6	0	1	10	100	10	6	17	215.076	0
2	6	0	1	10	100	10	6	17	215.076	20
2	6	0	1	10	100	10	6	17	215.076	20
2	6	0	1	10	75	10	6	18	240.076	0
2	6	0	1	10	75	10	6	18	240.076	0
2	6	0	1	10	75	10	6	18	240.076	0
2	6	0	1	10	75	10	6	18	240.076	0
2	6	0	1	10	75	10	6	18	240.076	0
2	6	0	1	10	75	10	6	18	240.076	0
2	6	0	1	10	100	10	6	18	240.076	0
2	6	0	1	10	100	10	6	18	240.076	0
2	6	0	1	10	100	10	6	18	240.076	0
2	6	0	1	10	100	10	6	18	240.076	0
2	6	0	1	10	100	10	6	18	240.076	20
2	6	0	1	10	100	10	6	18	240.076	20
2	6	0	1	10	75	10	6	19	265.076	0
2	6	0	1	10	75	10	6	19	265.076	0
2	6	0	1	10	75	10	6	19	265.076	0
2	6	0	1	10	75	10	6	19	265.076	0
2	6	0	1	10	75	10	6	19	265.076	0
2	6	0	1	10	75	10	6	19	265.076	0
2	6	0	1	10	100	10	6	19	265.076	0
2	6	0	1	10	100	10	6	19	265.076	0
2	6	0	1	10	100	10	6	19	265.076	0
2	6	0	1	10	100	10	6	19	265.076	0
2	6	0	1	10	100	10	6	19	265.076	20
2	6	0	1	10	100	10	6	19	265.076	20
2	6	0	1	10	75	10	6	20	290.076	0
2	6	0	1	10	75	10	6	20	290.076	0
2	6	0	1	10	75	10	6	20	290.076	0
2	6	0	1	10	75	10	6	20	290.076	0
2	6	0	1	10	75	10	6	20	290.076	0
2	6	0	1	10	75	10	6	20	290.076	0
2	6	0	1	10	100	10	6	20	290.076	0
2	6	0	1	10	100	10	6	20	290.076	0
2	6	0	1	10	100	10	6	20	290.076	0
2	6	0	1	10	100	10	6	20	290.076	0
2	6	0	1	10	100	10	6	20	290.076	20
2	6	0	1	10	100	10	6	20	290.076	20
2	6	1	1	3	75	4	7	0	0	0
2	6	1	1	3	75	4	7	0	0	0
2	6	1	1	3	75	4	7	0	0	0
2	6	1	1	3	100	4	7	0	0	0
2	6	1	1	3	100	4	7	0	0	0
2	6	1	1	3	100	4	7	0	0	0
2	6	1	1	3	75	4	7	1	4	0
2	6	1	1	3	75	4	7	1	4	0
2	6	1	1	3	75	4	7	1	4	0
2	6	1	1	3	75	4	7	1	4	0
2	6	1	1	3	75	4	7	1	4	0
2	6	1	1	3	75	4	7	1	4	0
2	6	1	1	3	100	4	7	1	4	0
2	6	1	1	3	100	4	7	1	4	0
2	6	1	1	3	100	4	7	1	4	0
2	6	1	1	3	100	4	7	1	4	0
2	6	1	1	3	100	4	7	1	4	0
2	6	1	1	3	100	4	7	1	4	0
2	6	1	1	3	75	4	7	2	8.07639	0
2	6	1	1	3	75	4	7	2	8.07639	0
2	6	1	1	3	75	4	7	2	8.07639	0
2	6	1	1	3	75	4	7	2	8.07639	0
2	6	1	1	3	75	4	7	2	8.07639	0
2	6	1	1	3	75	4	7	2	8.07639	0
2	9	1	1	3	100	4	7	2	8.07639	0
2	9	1	1	3	100	4	7	2	8.07639	0
2	9	1	1	3	100	4	7	2	8.07639	0
2	9	1	1	3	100	4	7	2	8.07639	0
2	9	1	1	3	100	4	7	2	8.07639	0
2	9	1	1	3	100	4	7	2	8.07639	0
2	9	1	1	3	75	4	7	3	12.0764	0
2	9	1	1	3	75	4	7	3	12.0764	0
2	9	1	1	3	75	4	7	3	12.0764	0
2	9	1	1	3	75	4	7	3	12.0764	0
2	9	1	1	3	75	4	7	3	12.0764	0
2	9	1	1	3	75	4	7	3	12.0764	0
2	9	1	1	3	100	4	7	3	12.0764	0
2	9	1	1	3	100	4	7	3	12.0764	0
2	9	1	1	3	100	4	7	3	12.0764	0
2	9	1	1	3	100	4	7	3	12.0764	0
2	9	1	1	3	100	4	7	3	12.0764	0
2	9	1	1	3	100	4	7	3	12.0764	0
2	9	1	1	3	75	4	7	4	16.0764	0
2	9	1	1	3	75	4	7	4	16.0764	0
2	9	1	1	3	75	4	7	4	16.0764	0
2	9	1	1	3	75	4	7	4	16.0764	0
2	9	1	1	3	75	4	7	4	16.0764	0
2	9	1	1	3	75	4	7	4	16.0764	0
2	9	1	1	3	100	4	7	4	16.0764	0
2	9	1	1	3	100	4	7	4	16.0764	0
2	9	1	1	3	100	4	7	4	16.0764	0
2	9	1	1	3	100	4	7	4	16.0764	0
2	9	1	1	3	100	4	7	4	16.0764	0
2	9	1	1	3	100	4	7	4	16.0764	0
2	9	1	1	3	75	4	7	5	41.0764	0
2	9	1	1	3	75	4	7	5	41.0764	0
2	9	1	1	3	75	4	7	5	41.0764	0
2	9	1	1	3	75	4	7	5	41.0764	0
2	9	1	1	3	75	4	7	5	41.0764	0
2	9	1	1	3	75	4	7	5	41.0764	0
2	9	1	1	3	100	4	7	5	41.0764	0
2	9	1	1	3	100	4	7	5	41.0764	0
2	9	1	1	3	100	4	7	5	41.0764	0
2	9	1	1	3	100	4	7	5	41.0764	0
2	9	1	1	3	100	4	7	5	41.0764	0
2	9	1	1	3	100	4	7	5	41.0764	0
2	9	1	1	3	75	4	7	6	66.0764	0
2	9	1	1	3	75	4	7	6	66.0764	0
2	9	1	1	3	75	4	7	6	66.0764	0
2	9	1	1	3	75	4	7	6	66.0764	0
2	9	1	1	3	75	4	7	6	66.0764	0
2	9	1	1	3	75	4	7	6	66.0764	0
2	9	1	1	3	100	4	7	6	66.0764	0
2	9	1	1	3	100	4	7	6	66.0764	0
2	9	1	1	3	100	4	7	6	66.0764	0
2	9	1	1	3	100	4	7	6	66.0764	0
2	9	1	1	3	100	4	7	6	66.0764	0
2	9	1	1	3	100	4	7	6	66.0764	0
2	9	1	1	3	75	4	7	7	91.0764	20
2	9	1	1	3	75	4	7	7	91.0764	20
2	9	1	1	3	75	4	7	7	91.0764	0
2	9	1	1	3	75	4	7	7	91.0764	0
2	9	1	1	3	75	4	7	7	91.0764	20
2	9	1	1	3	75	4	7	7	91.0764	0
2	9	1	1	3	100	4	7	7	91.0764	0
2	9	1	1	3	100	4	7	7	91.0764	0
2	9	1	1	3	100	4	7	7	91.0764	0
2	9	1	1	3	100	4	7	7	91.0764	0
2	9	1	1	3	100	4	7	7	91.0764	0
2	9	1	1	3	100	4	7	7	91.0764	0
2	9	1	1	3	75	4	7	8	116.076	20
2	9	1	1	3	75	4	7	8	116.076	20
2	9	1	1	3	75	4	7	8	116.076	0
2	9	1	1	3	75	4	7	8	116.076	0
2	9	1	1	3	75	4	7	8	116.076	20
2	9	1	1	3	75	4	7	8	116.076	0
2	9	1	1	3	100	4	7	8	116.076	0
2	9	1	1	3	100	4	7	8	116.076	0
2	9	1	1	3	100	4	7	8	116.076	0
2	9	1	1	3	100	4	7	8	116.076	0
2	9	1	1	3	100	4	7	8	116.076	0
2	9	1	1	3	100	4	7	8	116.076	0
2	9	1	1	3	75	4	7	9	141.076	20
2	9	1	1	3	75	4	7	9	141.076	20
2	9	1	1	3	75	4	7	9	141.076	0
2	9	1	1	3	75	4	7	9	141.076	0
2	9	1	1	3	75	4	7	9	141.076	20
2	9	1	1	3	75	4	7	9	141.076	0
2	9	1	1	3	100	4	7	9	141.076	0
2	9	1	1	3	100	4	7	9	141.076	0
2	9	1	1	3	100	4	7	9	141.076	0
2	9	1	1	3	100	4	7	9	141.076	0
2	9	1	1	3	100	4	7	9	141.076	0
2	9	1	1	3	100	4	7	9	141.076	0
2	9	1	1	3	75	4	7	10	166.076	20
2	9	1	1	3	75	4	7	10	166.076	20
2	9	1	1	3	75	4	7	10	166.076	0
2	9	1	1	3	75	4	7	10	166.076	0
2	9	1	1	3	75	4	7	10	166.076	20
2	9	1	1	3	75	4	7	10	166.076	0
2	9	1	1	3	100	4	7	10	166.076	0
2	9	1	1	3	100	4	7	10	166.076	0
2	9	1	1	3	100	4	7	10	166.076	0
2	9	1	1	3	100	4	7	10	166.076	0
2	9	1	1	3	100	4	7	10	166.076	0
2	9	1	1	3	100	4	7	10	166.076	0
2	9	1	1	3	75	4	7	11	191.076	20
2	9	1	1	3	75	4	7	11	191.076	20
2	9	1	1	3	75	4	7	11	191.076	0
2	9	1	1	3	75	4	7	11	191.076	0
2	9	1	1	3	75	4	7	11	191.076	20
2	9	1	1	3	75	4	7	11	191.076	0
2	9	1	1	3	100	4	7	11	191.076	0
2	9	1	1	3	100	4	7	11	191.076	0
2	9	1	1	3	100	4	7	11	191.076	0
2	9	1	1	3	100	4	7	11	191.076	0
2	9	1	1	3	100	4	7	11	191.076	0
2	9	1	1	3	100	4	7	11	191.076	0
2	9	1	1	3	75	4	7	12	216.076	20
2	9	1	1	3	75	4	7	12	216.076	20
2	9	1	1	3	75	4	7	12	216.076	0
2	9	1	1	3	75	4	7	12	216.076	0
2	9	1	1	3	75	4	7	12	216.076	20
2	9	1	1	3	75	4	7	12	216.076	0
2	9	1	1	3	100	4	7	12	216.076	0
2	9	1	1	3	100	4	7	12	216.076	0
2	9	1	1	3	100	4	7	12	216.076	0
2	9	1	1	3	100	4	7	12	216.076	0
2	9	1	1	3	100	4	7	12	216.076	0
2	9	1	1	3	100	4	7	12	216.076	0
2		1	1	3	75	4	7	13	241.076	20
2		1	1	3	75	4	7	13	241.076	20
2		1	1	3	75	4	7	13	241.076	0
2		1	1	3	75	4	7	13	241.076	0
2		1	1	3	75	4	7	13	241.076	20
2		1	1	3	75	4	7	13	241.076	0
2		1	1	3	100	4	7	13	241.076	0
2		1	1	3	100	4	7	13	241.076	0
2		1	1	3	100	4	7	13	241.076	0
2		1	1	3	100	4	7	13	241.076	0
2		1	1	3	100	4	7	13	241.076	0
2		1	1	3	100	4	7	13	241.076	0
2		1	1	3	75	4	7	14	266.076	20
2		1	1	3	75	4	7	14	266.076	20
2		1	1	3	75	4	7	14	266.076	0
2		1	1	3	75	4	7	14	266.076	0
2		1	1	3	75	4	7	14	266.076	20
2		1	1	3	75	4	7	14	266.076	0
2		1	1	3	100	4	7	14	266.076	0
2		1	1	3	100	4	7	14	266.076	0
2		1	1	3	100	4	7	14	266.076	0
2		1	1	3	100	4	7	14	266.076	0
2		1	1	3	100	4	7	14	266.076	0
2		1	1	3	100	4	7	14	266.076	0
2		1	1	3	75	4	7	15	291.076	20
2		1	1	3	75	4	7	15	291.076	20
2		1	1	3	75	4	7	15	291.076	0
2		1	1	3	75	4	7	15	291.076	0
2		1	1	3	75	4	7	15	291.076	20
2		1	1	3	75	4	7	15	291.076	0
2		1	1	3	100	4	7	15	291.076	0
2		1	1	3	100	4	7	15	291.076	0
2		1	1	3	100	4	7	15	291.076	0
2		1	1	3	100	4	7	15	291.076	0
2		1	1	3	100	4	7	15	291.076	0
2		1	1	3	100	4	7	15	291.076	0
2		1	1	3	75	4	7	16	316.076	20
2		1	1	3	75	4	7	16	316.076	20
2		1	1	3	75	4	7	16	316.076	0
2		1	1	3	75	4	7	16	316.076	0
2		1	1	3	75	4	7	16	316.076	20
2		1	1	3	75	4	7	16	316.076	0
2		1	1	3	100	4	7	16	316.076	0
2		1	1	3	100	4	7	16	316.076	0
2		1	1	3	100	4	7	16	316.076	0
2		1	1	3	100	4	7	16	316.076	0
2		1	1	3	100	4	7	16	316.076	0
2		1	1	3	100	4	7	16	316.076	0
2		1	1	3	75	4	7	17	341.076	20
2		1	1	3	75	4	7	17	341.076	20
2		1	1	3	75	4	7	17	341.076	0
2		1	1	3	75	4	7	17	341.076	0
2		1	1	3	75	4	7	17	341.076	20
2		1	1	3	75	4	7	17	341.076	0
2		1	1	3	100	4	7	17	341.076	0
2		1	1	3	100	4	7	17	341.076	0
2		1	1	3	100	4	7	17	341.076	0
2		1	1	3	100	4	7	17	341.076	0
2		1	1	3	100	4	7	17	341.076	0
2		1	1	3	100	4	7	17	341.076	0
2		1	1	3	75	4	7	18	366.076	20
2		1	1	3	75	4	7	18	366.076	20
2		1	1	3	75	4	7	18	366.076	0
2		1	1	3	75	4	7	18	366.076	0
2		1	1	3	75	4	7	18	366.076	20
2		1	1	3	75	4	7	18	366.076	0
2		1	1	3	100	4	7	18	366.076	0
2		1	1	3	100	4	7	18	366.076	0
2		1	1	3	100	4	7	18	366.076	0
2		1	1	3	100	4	7	18	366.076	0
2		1	1	3	100	4	7	18	366.076	0
2		1	1	3	100	4	7	18	366.076	0
2		1	1	3	75	4	7	19	391.076	20
2		1	1	3	75	4	7	19	391.076	20
2		1	1	3	75	4	7	19	391.076	0
2		1	1	3	75	4	7	19	391.076	0
2		1	1	3	75	4	7	19	391.076	20
2		1	1	3	75	4	7	19	391.076	0
2		1	1	3	100	4	7	19	391.076	0
2		1	1	3	100	4	7	19	391.076	0
2		1	1	3	100	4	7	19	391.076	0
2		1	1	3	100	4	7	19	391.076	0
2		1	1	3	100	4	7	19	391.076	0
2		1	1	3	100	4	7	19	391.076	0
2		1	1	3	75	4	7	20	416.076	20
2		1	1	3	75	4	7	20	416.076	20
2		1	1	3	75	4	7	20	416.076	0
2		1	1	3	75	4	7	20	416.076	20
2		1	1	3	75	4	7	20	416.076	20
2		1	1	3	75	4	7	20	416.076	0
2		1	1	3	100	4	7	20	416.076	0
2		1	1	3	100	4	7	20	416.076	0
2		1	1	3	100	4	7	20	416.076	0
2		1	1	3	100	4	7	20	416.076	0
2		1	1	3	100	4	7	20	416.076	0
2		1	1	3	100	4	7	20	416.076	0
2		1	1	10	75	11	6	0	0	0
2		1	1	10	75	11	6	0	0	0
2		1	1	10	75	11	6	0	0	0
2		1	1	10	100	11	6	0	0	0
2		1	1	10	100	11	6	0	0	0
2		1	1	10	100	11	6	0	0	0
2		1	1	10	75	11	6	1	4	0
2		1	1	10	75	11	6	1	4	0
2		1	1	10	75	11	6	1	4	0
2		1	1	10	75	11	6	1	4	0
2		1	1	10	75	11	6	1	4	0
2		1	1	10	75	11	6	1	4	0
2		1	1	10	100	11	6	1	4	0
2		1	1	10	100	11	6	1	4	0
2		1	1	10	100	11	6	1	4	0
2		1	1	10	100	11	6	1	4	0
2		1	1	10	100	11	6	1	4	0
2		1	1	10	100	11	6	1	4	0
2		1	1	10	75	11	6	2	8.07639	0
2		1	1	10	75	11	6	2	8.07639	0
2		1	1	10	75	11	6	2	8.07639	0
2		1	1	10	75	11	6	2	8.07639	0
2		1	1	10	75	11	6	2	8.07639	0
2		1	1	10	75	11	6	2	8.07639	0
2		1	1	10	100	11	6	2	8.07639	0
2		1	1	10	100	11	6	2	8.07639	0
2		1	1	10	100	11	6	2	8.07639	0
2		1	1	10	100	11	6	2	8.07639	0
2		1	1	10	100	11	6	2	8.07639	0
2		1	1	10	100	11	6	2	8.07639	0
2		1	1	10	75	11	6	3	12.0764	0
2		1	1	10	75	11	6	3	12.0764	0
2		1	1	10	75	11	6	3	12.0764	0
2		1	1	10	75	11	6	3	12.0764	0
2		1	1	10	75	11	6	3	12.0764	0
2		1	1	10	75	11	6	3	12.0764	0
2		1	1	10	100	11	6	3	12.0764	0
2		1	1	10	100	11	6	3	12.0764	0
2		1	1	10	100	11	6	3	12.0764	0
2		1	1	10	100	11	6	3	12.0764	0
2		1	1	10	100	11	6	3	12.0764	0
2		1	1	10	100	11	6	3	12.0764	0
2		1	1	10	75	11	6	4	16.0764	0
2		1	1	10	75	11	6	4	16.0764	0
2		1	1	10	75	11	6	4	16.0764	0
2		1	1	10	75	11	6	4	16.0764	0
2		1	1	10	75	11	6	4	16.0764	0
2		1	1	10	75	11	6	4	16.0764	0
2		1	1	10	100	11	6	4	16.0764	0
2		1	1	10	100	11	6	4	16.0764	0
2		1	1	10	100	11	6	4	16.0764	0
2		1	1	10	100	11	6	4	16.0764	0
2		1	1	10	100	11	6	4	16.0764	0
2		1	1	10	100	11	6	4	16.0764	0
2		1	1	10	75	11	6	5	20.0764	0
2		1	1	10	75	11	6	5	20.0764	0
2		1	1	10	75	11	6	5	20.0764	0
2		1	1	10	75	11	6	5	20.0764	0
2		1	1	10	75	11	6	5	20.0764	0
2		1	1	10	75	11	6	5	20.0764	0
2		1	1	10	100	11	6	5	20.0764	0
2		1	1	10	100	11	6	5	20.0764	0
2		1	1	10	100	11	6	5	20.0764	0
2		1	1	10	100	11	6	5	20.0764	0
2		1	1	10	100	11	6	5	20.0764	0
2		1	1	10	100	11	6	5	20.0764	0
2		1	1	10	75	11	6	6	24.0764	0
2		1	1	10	75	11	6	6	24.0764	0
2		1	1	10	75	11	6	6	24.0764	0
2		1	1	10	75	11	6	6	24.0764	0
2		1	1	10	75	11	6	6	24.0764	0
2		1	1	10	75	11	6	6	24.0764	0
2		1	1	10	100	11	6	6	24.0764	0
2		1	1	10	100	11	6	6	24.0764	0
2		1	1	10	100	11	6	6	24.0764	0
2		1	1	10	100	11	6	6	24.0764	0
2		1	1	10	100	11	6	6	24.0764	0
2		1	1	10	100	11	6	6	24.0764	0
2		1	1	10	75	11	6	7	28.0764	0
2		1	1	10	75	11	6	7	28.0764	0
2		1	1	10	75	11	6	7	28.0764	0
2		1	1	10	75	11	6	7	28.0764	0
2		1	1	10	75	11	6	7	28.0764	0
2		1	1	10	75	11	6	7	28.0764	0
2		1	1	10	100	11	6	7	28.0764	0
2		1	1	10	100	11	6	7	28.0764	0
2		1	1	10	100	11	6	7	28.0764	0
2		1	1	10	100	11	6	7	28.0764	0
2		1	1	10	100	11	6	7	28.0764	0
2		1	1	10	100	11	6	7	28.0764	0
2		1	1	10	75	11	6	8	32.0764	0
2		1	1	10	75	11	6	8	32.0764	0
2		1	1	10	75	11	6	8	32.0764	0
2		1	1	10	75	11	6	8	32.0764	0
2		1	1	10	75	11	6	8	32.0764	0
2		1	1	10	75	11	6	8	32.0764	0
2		1	1	10	100	11	6	8	32.0764	0
2		1	1	10	100	11	6	8	32.0764	0
2		1	1	10	100	11	6	8	32.0764	0
2		1	1	10	100	11	6	8	32.0764	0
2		1	1	10	100	11	6	8	32.0764	0
2		1	1	10	100	11	6	8	32.0764	0
2		1	1	10	75	11	6	9	36.0764	0
2		1	1	10	75	11	6	9	36.0764	0
2		1	1	10	75	11	6	9	36.0764	0
2		1	1	10	75	11	6	9	36.0764	0
2		1	1	10	75	11	6	9	36.0764	0
2		1	1	10	75	11	6	9	36.0764	0
2		1	1	10	100	11	6	9	36.0764	0
2		1	1	10	100	11	6	9	36.0764	0
2		1	1	10	100	11	6	9	36.0764	0
2		1	1	10	100	11	6	9	36.0764	0
2		1	1	10	100	11	6	9	36.0764	0
2		1	1	10	100	11	6	9	36.0764	0
2		1	1	10	75	11	6	10	40.0764	0
2		1	1	10	75	11	6	10	40.0764	0
2		1	1	10	75	11	6	10	40.0764	0
2		1	1	10	75	11	6	10	40.0764	0
2		1	1	10	75	11	6	10	40.0764	0
2		1	1	10	75	11	6	10	40.0764	0
2		1	1	10	100	11	6	10	40.0764	0
2		1	1	10	100	11	6	10	40.0764	0
2		1	1	10	100	11	6	10	40.0764	0
2		1	1	10	100	11	6	10	40.0764	0
2		1	1	10	100	11	6	10	40.0764	0
2		1	1	10	100	11	6	10	40.0764	0
2		1	1	10	75	11	6	11	44.0764	0
2		1	1	10	75	11	6	11	44.0764	0
2		1	1	10	75	11	6	11	44.0764	0
2		1	1	10	75	11	6	11	44.0764	0
2		1	1	10	75	11	6	11	44.0764	0
2		1	1	10	75	11	6	11	44.0764	0
2		1	1	10	100	11	6	11	44.0764	0
2		1	1	10	100	11	6	11	44.0764	0
2		1	1	10	100	11	6	11	44.0764	0
2		1	1	10	100	11	6	11	44.0764	0
2		1	1	10	100	11	6	11	44.0764	0
2		1	1	10	100	11	6	11	44.0764	0
2		1	1	10	75	11	6	12	69.0764	0
2		1	1	10	75	11	6	12	69.0764	0
2		1	1	10	75	11	6	12	69.0764	0
2		1	1	10	75	11	6	12	69.0764	0
2		1	1	10	75	11	6	12	69.0764	0
2		1	1	10	75	11	6	12	69.0764	0
2		1	1	10	100	11	6	12	69.0764	0
2		1	1	10	100	11	6	12	69.0764	0
2		1	1	10	100	11	6	12	69.0764	0
2		1	1	10	100	11	6	12	69.0764	0
2		1	1	10	100	11	6	12	69.0764	0
2		1	1	10	100	11	6	12	69.0764	0
2		1	1	10	75	11	6	13	94.0764	0
2		1	1	10	75	11	6	13	94.0764	0
2		1	1	10	75	11	6	13	94.0764	0
2		1	1	10	75	11	6	13	94.0764	0
2		1	1	10	75	11	6	13	94.0764	0
2		1	1	10	75	11	6	13	94.0764	0
2		1	1	10	100	11	6	13	94.0764	0
2		1	1	10	100	11	6	13	94.0764	0
2		1	1	10	100	11	6	13	94.0764	0
2		1	1	10	100	11	6	13	94.0764	0
2		1	1	10	100	11	6	13	94.0764	0
2		1	1	10	100	11	6	13	94.0764	0
2		1	1	10	75	11	6	14	119.076	0
2		1	1	10	75	11	6	14	119.076	0
2		1	1	10	75	11	6	14	119.076	0
2		1	1	10	75	11	6	14	119.076	0
2		1	1	10	75	11	6	14	119.076	0
2		1	1	10	75	11	6	14	119.076	0
2		1	1	10	100	11	6	14	119.076	0
2		1	1	10	100	11	6	14	119.076	0
2		1	1	10	100	11	6	14	119.076	0
2		1	1	10	100	11	6	14	119.076	20
2		1	1	10	100	11	6	14	119.076	0
2		1	1	10	100	11	6	14	119.076	20
2		1	1	10	75	11	6	15	144.076	20
2		1	1	10	75	11	6	15	144.076	0
2		1	1	10	75	11	6	15	144.076	20
2		1	1	10	75	11	6	15	144.076	0
2		1	1	10	75	11	6	15	144.076	0
2		1	1	10	75	11	6	15	144.076	0
2		1	1	10	100	11	6	15	144.076	0
2		1	1	10	100	11	6	15	144.076	0
2		1	1	10	100	11	6	15	144.076	0
2		1	1	10	100	11	6	15	144.076	20
2		1	1	10	100	11	6	15	144.076	0
2		1	1	10	100	11	6	15	144.076	20
2		1	1	10	75	11	6	16	169.076	20
2		1	1	10	75	11	6	16	169.076	0
2		1	1	10	75	11	6	16	169.076	20
2		1	1	10	75	11	6	16	169.076	0
2		1	1	10	75	11	6	16	169.076	0
2		1	1	10	75	11	6	16	169.076	0
2		1	1	10	100	11	6	16	169.076	0
2		1	1	10	100	11	6	16	169.076	0
2		1	1	10	100	11	6	16	169.076	0
2		1	1	10	100	11	6	16	169.076	20
2		1	1	10	100	11	6	16	169.076	0
2		1	1	10	100	11	6	16	169.076	20
2		1	1	10	75	11	6	17	194.076	20
2		1	1	10	75	11	6	17	194.076	0
2		1	1	10	75	11	6	17	194.076	20
2		1	1	10	75	11	6	17	194.076	0
2		1	1	10	75	11	6	17	194.076	0
2		1	1	10	75	11	6	17	194.076	0
2		1	1	10	100	11	6	17	194.076	0
2		1	1	10	100	11	6	17	194.076	0
2		1	1	10	100	11	6	17	194.076	0
2		1	1	10	100	11	6	17	194.076	20
2		1	1	10	100	11	6	17	194.076	0
2		1	1	10	100	11	6	17	194.076	20
2		1	1	10	75	11	6	18	219.076	20
2		1	1	10	75	11	6	18	219.076	0
2		1	1	10	75	11	6	18	219.076	20
2		1	1	10	75	11	6	18	219.076	0
2		1	1	10	75	11	6	18	219.076	20
2		1	1	10	75	11	6	18	219.076	0
2		1	1	10	100	11	6	18	219.076	0
2		1	1	10	100	11	6	18	219.076	0
2		1	1	10	100	11	6	18	219.076	0
2		1	1	10	100	11	6	18	219.076	20
2		1	1	10	100	11	6	18	219.076	0
2		1	1	10	100	11	6	18	219.076	20
2		1	1	10	75	11	6	19	244.076	20
2		1	1	10	75	11	6	19	244.076	0
2		1	1	10	75	11	6	19	244.076	20
2		1	1	10	75	11	6	19	244.076	0
2		1	1	10	75	11	6	19	244.076	20
2		1	1	10	75	11	6	19	244.076	0
2		1	1	10	100	11	6	19	244.076	0
2		1	1	10	100	11	6	19	244.076	0
2		1	1	10	100	11	6	19	244.076	0
2		1	1	10	100	11	6	19	244.076	20
2		1	1	10	100	11	6	19	244.076	0
2		1	1	10	100	11	6	19	244.076	20
2		1	1	10	75	11	6	20	269.076	20
2		1	1	10	75	11	6	20	269.076	0
2		1	1	10	75	11	6	20	269.076	40
2		1	1	10	75	11	6	20	269.076	0
2		1	1	10	75	11	6	20	269.076	20
2		1	1	10	75	11	6	20	269.076	0
2		1	1	10	100	11	6	20	269.076	0
2		1	1	10	100	11	6	20	269.076	0
2		1	1	10	100	11	6	20	269.076	0
2		1	1	10	100	11	6	20	269.076	20
2		1	1	10	100	11	6	20	269.076	0
2		1	1	10	100	11	6	20	269.076	20
2		3	1	0	75	3	7	0	0	0
2		3	1	0	75	3	7	0	0	0
2		3	1	0	75	3	7	0	0	0
2		3	1	0	100	3	7	0	0	0
2		3	1	0	100	3	7	0	0	0
2		3	1	0	100	3	7	0	0	0
2		3	1	0	75	3	7	1	4	0
2		3	1	0	75	3	7	1	4	0
2		3	1	0	75	3	7	1	4	0
2		3	1	0	75	3	7	1	4	0
2		3	1	0	75	3	7	1	4	0
2		3	1	0	75	3	7	1	4	0
2		3	1	0	100	3	7	1	4	0
2		3	1	0	100	3	7	1	4	0
2		3	1	0	100	3	7	1	4	0
2		3	1	0	100	3	7	1	4	0
2		3	1	0	100	3	7	1	4	0
2		3	1	0	100	3	7	1	4	0
2		3	1	0	75	3	7	2	8	0
2		3	1	0	75	3	7	2	8	0
2		3	1	0	75	3	7	2	8	0
2		3	1	0	75	3	7	2	8	0
2		3	1	0	75	3	7	2	8	0
2		3	1	0	75	3	7	2	8	0
2		3	1	0	100	3	7	2	8	0
2		3	1	0	100	3	7	2	8	0
2		3	1	0	100	3	7	2	8	0
2		3	1	0	100	3	7	2	8	0
2		3	1	0	100	3	7	2	8	0
2		3	1	0	100	3	7	2	8	0
2		3	1	0	75	3	7	3	12	0
2		3	1	0	75	3	7	3	12	0
2		3	1	0	75	3	7	3	12	0
2		3	1	0	75	3	7	3	12	0
2		3	1	0	75	3	7	3	12	0
2		3	1	0	75	3	7	3	12	0
2		3	1	0	100	3	7	3	12	0
2		3	1	0	100	3	7	3	12	0
2		3	1	0	100	3	7	3	12	0
2		3	1	0	100	3	7	3	12	0
2		3	1	0	100	3	7	3	12	0
2		3	1	0	100	3	7	3	12	0
2		3	1	0	75	3	7	4	36.9306	20
2		3	1	0	75	3	7	4	36.9306	0
2		3	1	0	75	3	7	4	36.9306	0
2		3	1	0	75	3	7	4	36.9306	0
2		3	1	0	75	3	7	4	36.9306	0
2		3	1	0	75	3	7	4	36.9306	0
2		3	1	0	100	3	7	4	36.9306	0
2		3	1	0	100	3	7	4	36.9306	0
2		3	1	0	100	3	7	4	36.9306	0
2		3	1	0	100	3	7	4	36.9306	0
2		3	1	0	100	3	7	4	36.9306	0
2		3	1	0	100	3	7	4	36.9306	0
2		3	1	0	75	3	7	5	61.9306	20
2		3	1	0	75	3	7	5	61.9306	0
2		3	1	0	75	3	7	5	61.9306	0
2		3	1	0	75	3	7	5	61.9306	0
2		3	1	0	75	3	7	5	61.9306	0
2		3	1	0	75	3	7	5	61.9306	0
2		3	1	0	100	3	7	5	61.9306	0
2		3	1	0	100	3	7	5	61.9306	0
2		3	1	0	100	3	7	5	61.9306	0
2		3	1	0	100	3	7	5	61.9306	0
2		3	1	0	100	3	7	5	61.9306	0
2		3	1	0	100	3	7	5	61.9306	0
2		3	1	0	75	3	7	6	86.9306	20
2		3	1	0	75	3	7	6	86.9306	0
2		3	1	0	75	3	7	6	86.9306	0
2		3	1	0	75	3	7	6	86.9306	0
2		3	1	0	75	3	7	6	86.9306	0
2		3	1	0	75	3	7	6	86.9306	0
2		3	1	0	100	3	7	6	86.9306	0
2		3	1	0	100	3	7	6	86.9306	0
2		3	1	0	100	3	7	6	86.9306	0
2		3	1	0	100	3	7	6	86.9306	0
2		3	1	0	100	3	7	6	86.9306	0
2		3	1	0	100	3	7	6	86.9306	0
2		3	1	0	75	3	7	7	111.931	20
2		3	1	0	75	3	7	7	111.931	0
2		3	1	0	75	3	7	7	111.931	0
2		3	1	0	75	3	7	7	111.931	0
2		3	1	0	75	3	7	7	111.931	0
2		3	1	0	75	3	7	7	111.931	0
2		3	1	0	100	3	7	7	111.931	20
2		3	1	0	100	3	7	7	111.931	0
2		3	1	0	100	3	7	7	111.931	0
2		3	1	0	100	3	7	7	111.931	0
2		3	1	0	100	3	7	7	111.931	0
2		3	1	0	100	3	7	7	111.931	20
2		3	1	0	75	3	7	8	136.931	20
2		3	1	0	75	3	7	8	136.931	0
2		3	1	0	75	3	7	8	136.931	0
2		3	1	0	75	3	7	8	136.931	0
2		3	1	0	75	3	7	8	136.931	0
2		3	1	0	75	3	7	8	136.931	0
2		3	1	0	100	3	7	8	136.931	20
2		3	1	0	100	3	7	8	136.931	0
2		3	1	0	100	3	7	8	136.931	0
2		3	1	0	100	3	7	8	136.931	0
2		3	1	0	100	3	7	8	136.931	20
2		3	1	0	100	3	7	8	136.931	20
2		3	1	0	75	3	7	9	161.931	20
2		3	1	0	75	3	7	9	161.931	0
2		3	1	0	75	3	7	9	161.931	0
2		3	1	0	75	3	7	9	161.931	0
2		3	1	0	75	3	7	9	161.931	0
2		3	1	0	75	3	7	9	161.931	0
2		3	1	0	100	3	7	9	161.931	20
2		3	1	0	100	3	7	9	161.931	0
2		3	1	0	100	3	7	9	161.931	0
2		3	1	0	100	3	7	9	161.931	0
2		3	1	0	100	3	7	9	161.931	20
2		3	1	0	100	3	7	9	161.931	20
2		3	1	0	75	3	7	10	186.931	20
2		3	1	0	75	3	7	10	186.931	0
2		3	1	0	75	3	7	10	186.931	0
2		3	1	0	75	3	7	10	186.931	0
2		3	1	0	75	3	7	10	186.931	0
2		3	1	0	75	3	7	10	186.931	0
2		3	1	0	100	3	7	10	186.931	20
2		3	1	0	100	3	7	10	186.931	0
2		3	1	0	100	3	7	10	186.931	0
2		3	1	0	100	3	7	10	186.931	0
2		3	1	0	100	3	7	10	186.931	20
2		3	1	0	100	3	7	10	186.931	20
2		3	1	0	75	3	7	11	211.931	20
2		3	1	0	75	3	7	11	211.931	0
2		3	1	0	75	3	7	11	211.931	0
2		3	1	0	75	3	7	11	211.931	0
2		3	1	0	75	3	7	11	211.931	0
2		3	1	0	75	3	7	11	211.931	0
2		3	1	0	100	3	7	11	211.931	20
2		3	1	0	100	3	7	11	211.931	0
2		3	1	0	100	3	7	11	211.931	0
2		3	1	0	100	3	7	11	211.931	0
2		3	1	0	100	3	7	11	211.931	20
2		3	1	0	100	3	7	11	211.931	20
2		3	1	0	75	3	7	12	236.931	20
2		3	1	0	75	3	7	12	236.931	0
2		3	1	0	75	3	7	12	236.931	0
2		3	1	0	75	3	7	12	236.931	0
2		3	1	0	75	3	7	12	236.931	0
2		3	1	0	75	3	7	12	236.931	0
2		3	1	0	100	3	7	12	236.931	20
2		3	1	0	100	3	7	12	236.931	0
2		3	1	0	100	3	7	12	236.931	0
2		3	1	0	100	3	7	12	236.931	0
2		3	1	0	100	3	7	12	236.931	20
2		3	1	0	100	3	7	12	236.931	20
2		3	1	0	75	3	7	13	261.931	20
2		3	1	0	75	3	7	13	261.931	0
2		3	1	0	75	3	7	13	261.931	0
2		3	1	0	75	3	7	13	261.931	0
2		3	1	0	75	3	7	13	261.931	0
2		3	1	0	75	3	7	13	261.931	0
2		3	1	0	100	3	7	13	261.931	20
2		3	1	0	100	3	7	13	261.931	0
2		3	1	0	100	3	7	13	261.931	0
2		3	1	0	100	3	7	13	261.931	0
2		3	1	0	100	3	7	13	261.931	20
2		3	1	0	100	3	7	13	261.931	20
2		3	1	0	75	3	7	14	286.931	20
2		3	1	0	75	3	7	14	286.931	0
2		3	1	0	75	3	7	14	286.931	0
2		3	1	0	75	3	7	14	286.931	0
2		3	1	0	75	3	7	14	286.931	0
2		3	1	0	75	3	7	14	286.931	0
2		3	1	0	100	3	7	14	286.931	20
2		3	1	0	100	3	7	14	286.931	0
2		3	1	0	100	3	7	14	286.931	0
2		3	1	0	100	3	7	14	286.931	0
2		3	1	0	100	3	7	14	286.931	20
2		3	1	0	100	3	7	14	286.931	20
2		3	1	0	75	3	7	15	311.931	20
2		3	1	0	75	3	7	15	311.931	0
2		3	1	0	75	3	7	15	311.931	0
2		3	1	0	75	3	7	15	311.931	0
2		3	1	0	75	3	7	15	311.931	0
2		3	1	0	75	3	7	15	311.931	0
2		3	1	0	100	3	7	15	311.931	20
2		3	1	0	100	3	7	15	311.931	0
2		3	1	0	100	3	7	15	311.931	0
2		3	1	0	100	3	7	15	311.931	0
2		3	1	0	100	3	7	15	311.931	20
2		3	1	0	100	3	7	15	311.931	20
2		3	1	0	75	3	7	16	336.931	20
2		3	1	0	75	3	7	16	336.931	0
2		3	1	0	75	3	7	16	336.931	0
2		3	1	0	75	3	7	16	336.931	0
2		3	1	0	75	3	7	16	336.931	0
2		3	1	0	75	3	7	16	336.931	0
2		3	1	0	100	3	7	16	336.931	20
2		3	1	0	100	3	7	16	336.931	0
2		3	1	0	100	3	7	16	336.931	0
2		3	1	0	100	3	7	16	336.931	0
2		3	1	0	100	3	7	16	336.931	20
2		3	1	0	100	3	7	16	336.931	20
2		3	1	0	75	3	7	17	361.931	20
2		3	1	0	75	3	7	17	361.931	0
2		3	1	0	75	3	7	17	361.931	0
2		3	1	0	75	3	7	17	361.931	0
2		3	1	0	75	3	7	17	361.931	0
2		3	1	0	75	3	7	17	361.931	0
2		3	1	0	100	3	7	17	361.931	20
2		3	1	0	100	3	7	17	361.931	0
2		3	1	0	100	3	7	17	361.931	0
2		3	1	0	100	3	7	17	361.931	0
2		3	1	0	100	3	7	17	361.931	20
2		3	1	0	100	3	7	17	361.931	20
2		3	1	0	75	3	7	18	386.931	20
2		3	1	0	75	3	7	18	386.931	0
2		3	1	0	75	3	7	18	386.931	0
2		3	1	0	75	3	7	18	386.931	0
2		3	1	0	75	3	7	18	386.931	0
2		3	1	0	75	3	7	18	386.931	0
2		3	1	0	100	3	7	18	386.931	20
2		3	1	0	100	3	7	18	386.931	0
2		3	1	0	100	3	7	18	386.931	0
2		3	1	0	100	3	7	18	386.931	0
2		3	1	0	100	3	7	18	386.931	20
2		3	1	0	100	3	7	18	386.931	20
2		3	1	0	75	3	7	19	411.931	20
2		3	1	0	75	3	7	19	411.931	0
2		3	1	0	75	3	7	19	411.931	0
2		3	1	0	75	3	7	19	411.931	0
2		3	1	0	75	3	7	19	411.931	0
2		3	1	0	75	3	7	19	411.931	0
2		3	1	0	100	3	7	19	411.931	20
2		3	1	0	100	3	7	19	411.931	0
2		3	1	0	100	3	7	19	411.931	0
2		3	1	0	100	3	7	19	411.931	0
2		3	1	0	100	3	7	19	411.931	20
2		3	1	0	100	3	7	19	411.931	20
2		3	1	0	75	3	7	20	436.931	20
2		3	1	0	75	3	7	20	436.931	0
2		3	1	0	75	3	7	20	436.931	0
2		3	1	0	75	3	7	20	436.931	0
2		3	1	0	75	3	7	20	436.931	0
2		3	1	0	75	3	7	20	436.931	0
2		3	1	0	100	3	7	20	436.931	20
2		3	1	0	100	3	7	20	436.931	0
2		3	1	0	100	3	7	20	436.931	0
2		3	1	0	100	3	7	20	436.931	0
2		3	1	0	100	3	7	20	436.931	20
2		3	1	0	100	3	7	20	436.931	20
2		3	1	3	75	6	7	0	0	0
2		3	1	3	75	6	7	0	0	0
2		3	1	3	75	6	7	0	0	0
2		3	1	3	100	6	7	0	0	0
2		3	1	3	100	6	7	0	0	0
2		3	1	3	100	6	7	0	0	0
2		3	1	3	75	6	7	1	4	0
2		3	1	3	75	6	7	1	4	0
2		3	1	3	75	6	7	1	4	0
2		3	1	3	75	6	7	1	4	0
2		3	1	3	75	6	7	1	4	0
2		3	1	3	75	6	7	1	4	0
2		3	1	3	100	6	7	1	4	0
2		3	1	3	100	6	7	1	4	0
2		3	1	3	100	6	7	1	4	0
2		3	1	3	100	6	7	1	4	0
2		3	1	3	100	6	7	1	4	0
2		3	1	3	100	6	7	1	4	0
2		3	1	3	75	6	7	2	8	0
2		3	1	3	75	6	7	2	8	0
2		3	1	3	75	6	7	2	8	0
2		3	1	3	75	6	7	2	8	0
2		3	1	3	75	6	7	2	8	0
2		3	1	3	75	6	7	2	8	0
2		3	1	3	100	6	7	2	8	0
2		3	1	3	100	6	7	2	8	0
2		3	1	3	100	6	7	2	8	0
2		3	1	3	100	6	7	2	8	0
2		3	1	3	100	6	7	2	8	0
2		3	1	3	100	6	7	2	8	0
2		3	1	3	75	6	7	3	12	0
2		3	1	3	75	6	7	3	12	0
2		3	1	3	75	6	7	3	12	0
2		3	1	3	75	6	7	3	12	0
2		3	1	3	75	6	7	3	12	0
2		3	1	3	75	6	7	3	12	0
2		3	1	3	100	6	7	3	12	0
2		3	1	3	100	6	7	3	12	0
2		3	1	3	100	6	7	3	12	0
2		3	1	3	100	6	7	3	12	0
2		3	1	3	100	6	7	3	12	0
2		3	1	3	100	6	7	3	12	0
2		3	1	3	75	6	7	4	16.0764	0
2		3	1	3	75	6	7	4	16.0764	0
2		3	1	3	75	6	7	4	16.0764	0
2		3	1	3	75	6	7	4	16.0764	0
2		3	1	3	75	6	7	4	16.0764	0
2		3	1	3	75	6	7	4	16.0764	0
2		3	1	3	100	6	7	4	16.0764	0
2		3	1	3	100	6	7	4	16.0764	0
2		3	1	3	100	6	7	4	16.0764	0
2		3	1	3	100	6	7	4	16.0764	0
2		3	1	3	100	6	7	4	16.0764	0
2		3	1	3	100	6	7	4	16.0764	0
2		3	1	3	75	6	7	5	20.0764	0
2		3	1	3	75	6	7	5	20.0764	0
2		3	1	3	75	6	7	5	20.0764	0
2		3	1	3	75	6	7	5	20.0764	0
2		3	1	3	75	6	7	5	20.0764	0
2		3	1	3	75	6	7	5	20.0764	0
2		3	1	3	100	6	7	5	20.0764	0
2		3	1	3	100	6	7	5	20.0764	0
2		3	1	3	100	6	7	5	20.0764	0
2		3	1	3	100	6	7	5	20.0764	0
2		3	1	3	100	6	7	5	20.0764	0
2		3	1	3	100	6	7	5	20.0764	0
2		3	1	3	75	6	7	6	24.0764	0
2		3	1	3	75	6	7	6	24.0764	0
2		3	1	3	75	6	7	6	24.0764	0
2		3	1	3	75	6	7	6	24.0764	0
2		3	1	3	75	6	7	6	24.0764	0
2		3	1	3	75	6	7	6	24.0764	0
2		3	1	3	100	6	7	6	24.0764	0
2		3	1	3	100	6	7	6	24.0764	0
2		3	1	3	100	6	7	6	24.0764	0
2		3	1	3	100	6	7	6	24.0764	0
2		3	1	3	100	6	7	6	24.0764	0
2		3	1	3	100	6	7	6	24.0764	0
2		3	1	3	75	6	7	7	49.0764	0
2		3	1	3	75	6	7	7	49.0764	0
2		3	1	3	75	6	7	7	49.0764	20
2		3	1	3	75	6	7	7	49.0764	0
2		3	1	3	75	6	7	7	49.0764	0
2		3	1	3	75	6	7	7	49.0764	0
2		3	1	3	100	6	7	7	49.0764	0
2		3	1	3	100	6	7	7	49.0764	0
2		3	1	3	100	6	7	7	49.0764	0
2		3	1	3	100	6	7	7	49.0764	0
2		3	1	3	100	6	7	7	49.0764	0
2		3	1	3	100	6	7	7	49.0764	0
2		3	1	3	75	6	7	8	74.0764	0
2		3	1	3	75	6	7	8	74.0764	0
2		3	1	3	75	6	7	8	74.0764	20
2		3	1	3	75	6	7	8	74.0764	0
2		3	1	3	75	6	7	8	74.0764	0
2		3	1	3	75	6	7	8	74.0764	0
2		3	1	3	100	6	7	8	74.0764	0
2		3	1	3	100	6	7	8	74.0764	0
2		3	1	3	100	6	7	8	74.0764	0
2		3	1	3	100	6	7	8	74.0764	20
2		3	1	3	100	6	7	8	74.0764	0
2		3	1	3	100	6	7	8	74.0764	0
2		3	1	3	75	6	7	9	99.0764	0
2		3	1	3	75	6	7	9	99.0764	0
2		3	1	3	75	6	7	9	99.0764	20
2		3	1	3	75	6	7	9	99.0764	0
2		3	1	3	75	6	7	9	99.0764	20
2		3	1	3	75	6	7	9	99.0764	0
2		3	1	3	100	6	7	9	99.0764	0
2		3	1	3	100	6	7	9	99.0764	0
2		3	1	3	100	6	7	9	99.0764	0
2		3	1	3	100	6	7	9	99.0764	20
2		3	1	3	100	6	7	9	99.0764	0
2		3	1	3	100	6	7	9	99.0764	0
2		3	1	3	75	6	7	10	124.076	0
2		3	1	3	75	6	7	10	124.076	0
2		3	1	3	75	6	7	10	124.076	20
2		3	1	3	75	6	7	10	124.076	0
2		3	1	3	75	6	7	10	124.076	20
2		3	1	3	75	6	7	10	124.076	0
2		3	1	3	100	6	7	10	124.076	0
2		3	1	3	100	6	7	10	124.076	0
2		3	1	3	100	6	7	10	124.076	0
2		3	1	3	100	6	7	10	124.076	20
2		3	1	3	100	6	7	10	124.076	0
2		3	1	3	100	6	7	10	124.076	0
2		3	1	3	75	6	7	11	149.076	0
2		3	1	3	75	6	7	11	149.076	0
2		3	1	3	75	6	7	11	149.076	20
2		3	1	3	75	6	7	11	149.076	0
2		3	1	3	75	6	7	11	149.076	20
2		3	1	3	75	6	7	11	149.076	0
2		3	1	3	100	6	7	11	149.076	0
2		3	1	3	100	6	7	11	149.076	0
2		3	1	3	100	6	7	11	149.076	0
2		3	1	3	100	6	7	11	149.076	20
2		3	1	3	100	6	7	11	149.076	0
2		3	1	3	100	6	7	11	149.076	0
2		3	1	3	75	6	7	12	174.076	0
2		3	1	3	75	6	7	12	174.076	0
2		3	1	3	75	6	7	12	174.076	20
2		3	1	3	75	6	7	12	174.076	0
2		3	1	3	75	6	7	12	174.076	20
2		3	1	3	75	6	7	12	174.076	0
2		3	1	3	100	6	7	12	174.076	0
2		3	1	3	100	6	7	12	174.076	0
2		3	1	3	100	6	7	12	174.076	0
2		3	1	3	100	6	7	12	174.076	20
2		3	1	3	100	6	7	12	174.076	0
2		3	1	3	100	6	7	12	174.076	0
2		3	1	3	75	6	7	13	199.076	0
2		3	1	3	75	6	7	13	199.076	0
2		3	1	3	75	6	7	13	199.076	20
2		3	1	3	75	6	7	13	199.076	0
2		3	1	3	75	6	7	13	199.076	20
2		3	1	3	75	6	7	13	199.076	0
2		3	1	3	100	6	7	13	199.076	0
2		3	1	3	100	6	7	13	199.076	0
2		3	1	3	100	6	7	13	199.076	0
2		3	1	3	100	6	7	13	199.076	20
2		3	1	3	100	6	7	13	199.076	0
2		3	1	3	100	6	7	13	199.076	0
2		3	1	3	75	6	7	14	224.076	0
2		3	1	3	75	6	7	14	224.076	0
2		3	1	3	75	6	7	14	224.076	20
2		3	1	3	75	6	7	14	224.076	0
2		3	1	3	75	6	7	14	224.076	20
2		3	1	3	75	6	7	14	224.076	0
2		3	1	3	100	6	7	14	224.076	0
2		3	1	3	100	6	7	14	224.076	0
2		3	1	3	100	6	7	14	224.076	0
2		3	1	3	100	6	7	14	224.076	20
2		3	1	3	100	6	7	14	224.076	0
2		3	1	3	100	6	7	14	224.076	0
2		3	1	3	75	6	7	15	249.076	0
2		3	1	3	75	6	7	15	249.076	0
2		3	1	3	75	6	7	15	249.076	20
2		3	1	3	75	6	7	15	249.076	0
2		3	1	3	75	6	7	15	249.076	20
2		3	1	3	75	6	7	15	249.076	0
2		3	1	3	100	6	7	15	249.076	0
2		3	1	3	100	6	7	15	249.076	0
2		3	1	3	100	6	7	15	249.076	0
2		3	1	3	100	6	7	15	249.076	20
2		3	1	3	100	6	7	15	249.076	0
2		3	1	3	100	6	7	15	249.076	0
2		3	1	3	75	6	7	16	274.076	0
2		3	1	3	75	6	7	16	274.076	0
2		3	1	3	75	6	7	16	274.076	20
2		3	1	3	75	6	7	16	274.076	0
2		3	1	3	75	6	7	16	274.076	20
2		3	1	3	75	6	7	16	274.076	0
2		3	1	3	100	6	7	16	274.076	0
2		3	1	3	100	6	7	16	274.076	0
2		3	1	3	100	6	7	16	274.076	0
2		3	1	3	100	6	7	16	274.076	20
2		3	1	3	100	6	7	16	274.076	0
2		3	1	3	100	6	7	16	274.076	0
2		3	1	3	75	6	7	17	299.076	0
2		3	1	3	75	6	7	17	299.076	0
2		3	1	3	75	6	7	17	299.076	20
2		3	1	3	75	6	7	17	299.076	0
2		3	1	3	75	6	7	17	299.076	20
2		3	1	3	75	6	7	17	299.076	0
2		3	1	3	100	6	7	17	299.076	0
2		3	1	3	100	6	7	17	299.076	0
2		3	1	3	100	6	7	17	299.076	0
2		3	1	3	100	6	7	17	299.076	20
2		3	1	3	100	6	7	17	299.076	0
2		3	1	3	100	6	7	17	299.076	0
2		3	1	3	75	6	7	18	324.076	0
2		3	1	3	75	6	7	18	324.076	0
2		3	1	3	75	6	7	18	324.076	20
2		3	1	3	75	6	7	18	324.076	0
2		3	1	3	75	6	7	18	324.076	20
2		3	1	3	75	6	7	18	324.076	0
2		3	1	3	100	6	7	18	324.076	0
2		3	1	3	100	6	7	18	324.076	0
2		3	1	3	100	6	7	18	324.076	0
2		3	1	3	100	6	7	18	324.076	20
2		3	1	3	100	6	7	18	324.076	0
2		3	1	3	100	6	7	18	324.076	0
2		3	1	3	75	6	7	19	349.076	0
2		3	1	3	75	6	7	19	349.076	0
2		3	1	3	75	6	7	19	349.076	20
2		3	1	3	75	6	7	19	349.076	0
2		3	1	3	75	6	7	19	349.076	20
2		3	1	3	75	6	7	19	349.076	0
2		3	1	3	100	6	7	19	349.076	0
2		3	1	3	100	6	7	19	349.076	0
2		3	1	3	100	6	7	19	349.076	0
2		3	1	3	100	6	7	19	349.076	20
2		3	1	3	100	6	7	19	349.076	0
2		3	1	3	100	6	7	19	349.076	0
2		3	1	3	75	6	7	20	374.076	0
2		3	1	3	75	6	7	20	374.076	0
2		3	1	3	75	6	7	20	374.076	20
2		3	1	3	75	6	7	20	374.076	0
2		3	1	3	75	6	7	20	374.076	20
2		3	1	3	75	6	7	20	374.076	0
2		3	1	3	100	6	7	20	374.076	0
2		3	1	3	100	6	7	20	374.076	0
2		3	1	3	100	6	7	20	374.076	0
2		3	1	3	100	6	7	20	374.076	20
2		3	1	3	100	6	7	20	374.076	0
2		3	1	3	100	6	7	20	374.076	0
2		3	1	10	75	13	6	0	0	0
2		3	1	10	75	13	6	0	0	0
2		3	1	10	75	13	6	0	0	0
2		3	1	10	100	13	6	0	0	0
2		3	1	10	100	13	6	0	0	0
2		3	1	10	100	13	6	0	0	0
2		3	1	10	75	13	6	1	4	0
2		3	1	10	75	13	6	1	4	0
2		3	1	10	75	13	6	1	4	0
2		3	1	10	75	13	6	1	4	0
2		3	1	10	75	13	6	1	4	0
2		3	1	10	75	13	6	1	4	0
2		3	1	10	100	13	6	1	4	0
2		3	1	10	100	13	6	1	4	0
2		3	1	10	100	13	6	1	4	0
2		3	1	10	100	13	6	1	4	0
2		3	1	10	100	13	6	1	4	0
2		3	1	10	100	13	6	1	4	0
2		3	1	10	75	13	6	2	8	0
2		3	1	10	75	13	6	2	8	0
2		3	1	10	75	13	6	2	8	0
2		3	1	10	75	13	6	2	8	0
2		3	1	10	75	13	6	2	8	0
2		3	1	10	75	13	6	2	8	0
2		3	1	10	100	13	6	2	8	0
2		3	1	10	100	13	6	2	8	0
2		3	1	10	100	13	6	2	8	0
2		3	1	10	100	13	6	2	8	0
2		3	1	10	100	13	6	2	8	0
2		3	1	10	100	13	6	2	8	0
2		3	1	10	75	13	6	3	12	0
[truncated: 215 more rows]

## Sheet: RH%
ANOVA for TA © - Square sum Type III
Source	Square sum	Gl	Mean Square	F	P			ANOVA for AULIC © - Square sum Type III
MAIN FACTORS								Source	Square sum	Gl	Mean Square	F	P
A:cold days	0.15098	7	0.0215686	3.89	0.0009			MAIN FACTORS
B:RH%	0.000727949	1	0.000727949	0.13	0.7178			A:Experiment	105351	1	105351	7.94	0.0055
INTERACTIONS								B:RH%	724.144	1	724.144	0.05	0.8156
AB	0.0303899	7	0.00434142	0.78	0.6027			C:Treatment	441072	9	49008	3.69	0.0004
RESIDUES	0.509701	92	0.00554022					INTERACTIONS
TOTAL (CORRECTED)	0.691468	107						AB	3626.91	1	3626.91	0.27	0.6019
All F-ratios are based on the mean square of the residual error								AC	192937	9	21437.5	1.62	0.1161
								BC	241775	9	26863.9	2.03	0.053
								ABC	144093	9	16010.3	1.21	0.2954
ANOVA for TA © - Square sum Type III								RESIDUES	1843610	139	13263.4
Source	Square sum	Gl	Mean Square	F	P			TOTAL (CORRECTED)	2817810	178
MAIN FACTORS								All F-ratios are based on the mean square of the residual error
A:cold days	0.239924	7	0.0342748	2.68	0.0235
B:RH%	1.57017e-05	1	1.57017e-05	0	0.9722			El StatAdvisor
INTERACTIONS								The ANOVA table breaks down the variability of AULIC into contributions due to various factors. Since the sum of Type III squares has been chosen (by default), the contribution of each factor is measured by eliminating the effects of the other factors. The P-values prove the statistical significance of each of the factors. Since 2 P-values are less than 0.05, these factors have a statistically si…
AB	0.375169	7	0.0535956	4.19	0.0017
RESIDUES	0.486457	38	0.0128015
TOTAL (CORRECTED)	1.10209	53
All F-ratios are based on the mean square of the residual error
ANOVA for TA © - Square sum Type III
Source	Square sum	Gl	Mean Square	F	P
MAIN FACTORS
A:pre cooling	0.0201219	2	0.010061	0.55	0.5824
B:cold-storage	0.182247	2	0.0911233	4.96	0.0119
C:RH%	0.000535103	1	0.000535103	0.03	0.8653
INTERACTIONS
AB	0.040766	4	0.0101915	0.56	0.6965
AC	0.105575	2	0.0527873	2.88	0.0681
BC	0.0184277	2	0.00921384	0.5	0.6092
RESIDUES	0.734413	40	0.0183603
TOTAL (CORRECTED)	1.10209	53
All F-ratios are based on the mean square of the residual error

## Sheet: Gompertz 1
T1
Gompertz M(a,b,c)	Parameters	Std Error	T Value	95% Conf Lim	95% Conf Lim	X Observed	Y Observed	Y Predicted	Y Residual	Y Residual%	95% Conf Lim	95% Conf Lim	95% Pred Lim	95% Pred Lim	First Deriv	Second Deriv	Area	X Generated	Y Predicted	95% Conf Lim	95% Conf Lim	95% Pred Lim	95% Pred Lim	First Deriv	Second Deriv	Area
8001	11.9362	0.314291	37.9782	11.2759	12.5965	0	0	0.206046	-0.206046	0	-0.163516	0.575608	-1.53842	1.95051	0.0123992	1.44412e-05	0	0	0.206046	-0.163516	0.575608	-1.53842	1.95051	0.0123992	1.44412e-05	0
0.967405	0.065103	0.00756177	8.60948	0.0492163	0.0809897	25	0	0.724301	-0.724301	0	0.00362571	1.44498	-1.12663	2.57524	0.0300878	2.94621e-06	10.7016	1	0.218729	-0.164678	0.602136	-1.52872	1.96618	0.0129687	1.42434e-05	0.21234
0.961653	27.0491	10.9692	2.46591	4.00364	50.0947	50	0	1.72503	-1.72503	0	0.802167	2.64789	-0.213594	3.66365	0.0494665	-1.15402e-05	40.3009	2	0.231988	-0.165413	0.62939	-1.51859	1.98256	0.0135524	1.40184e-05	0.43765
0.811487						75	4.44444	3.14021	1.30424	29.3453	2.24441	4.03601	1.21432	5.0661	0.0621609	-1.67052e-05	100.452	3	0.245838	-0.165692	0.657368	-1.508	1.99968	0.0141502	1.3767e-05	0.676513
267.115						100	6.29667	4.74844	1.54823	24.5881	3.96191	5.53496	2.87088	6.62599	0.0648863	-1.30577e-05	198.921	4	0.260293	-0.165483	0.686069	-1.49694	2.01753	0.0147617	1.34894e-05	0.929528
						125	6.29667	6.3172	-0.0205347	-0.32612	5.56883	7.06558	4.45531	8.1791	0.0595896	-6.60106e-06	337.521	5	0.275366	-0.164756	0.715489	-1.4854	2.03613	0.0153868	1.31858e-05	1.19731
						150	6.29667	7.69317	-1.3965	-22.1784	6.93442	8.45192	5.82708	9.55926	0.050095	-1.37303e-06	513.147	6	0.291071	-0.163482	0.745624	-1.47336	2.0555	0.016025	1.28571e-05	1.48047
						175	9.07722	8.81418	0.263038	2.89778	8.0727	9.55567	6.95505	10.6733	0.03962	1.58901e-06	720.037	7	0.30742	-0.161629	0.77647	-1.4608	2.07564	0.016676	1.25032e-05	1.77966
						200	9.07722	9.68196	-0.604742	-6.66219	9.00156	10.3624	7.84633	11.5176	0.0300428	2.74607e-06	951.738	8	0.324427	-0.159168	0.808022	-1.4477	2.09656	0.0173396	1.21262e-05	2.09553
						225	10.9278	10.3304	0.597424	5.46702	9.73247	10.9282	8.52368	12.137	0.0221276	2.85796e-06	1202.3	9	0.342104	-0.156067	0.840274	-1.43406	2.11827	0.0180153	1.17251e-05	2.42874
						250	10.9278	10.8031	0.124672	1.14088	10.2799	11.3263	9.01975	12.5865	0.0159739	2.49366e-06	1466.79	10	0.360462	-0.152297	0.873221	-1.41985	2.14077	0.0187027	1.13019e-05	2.77997
						275	10.9278	11.142	-0.214235	-1.96047	10.6647	11.6193	9.37158	12.9124	0.0113729	1.9932e-06	1741.35	11	0.379513	-0.147828	0.906854	-1.40505	2.16408	0.0194014	1.08579e-05	3.14989
						300	10.9278	11.3821	-0.45437	-4.15793	10.9166	11.8477	9.61486	13.1494	0.00802001	1.52049e-06	2023.07	12	0.399268	-0.142631	0.941167	-1.38965	2.18819	0.020111	1.0392e-05	3.53923
						325	10.9278	11.5509	-0.623149	-5.70243	11.0718	12.0301	9.78001	13.3218	0.00561838	1.11283e-06	2309.86	13	0.419738	-0.136675	0.976152	-1.37363	2.21311	0.020831	9.90646e-06	3.94867
						350	11.855	11.6689	0.186105	1.56985	11.1636	12.1742	9.89072	13.4471	0.00391803	8.03177e-07	2600.2	14	0.440933	-0.129934	1.0118	-1.35698	2.23884	0.0215608	9.40266e-06	4.37894
						375	11.855	11.751	0.103969	0.877004	11.2167	12.2854	9.96437	13.5377	0.00272369	5.72459e-07	2893.01	15	0.462863	-0.122378	1.0481	-1.33966	2.26539	0.0223001	8.88135e-06	4.83078
						400	11.855	11.8081	0.0469322	0.395885	11.2467	12.3695	10.0131	13.603	0.00188931	4.02456e-07	3187.54	16	0.485537	-0.11398	1.08505	-1.32167	2.29275	0.0230482	8.34258e-06	5.30492
						425	11.855	11.8476	0.00739785	0.0624028	11.2633	12.4319	10.0454	13.6498	0.00130858	2.78423e-07	3483.27	17	0.508962	-0.104714	1.12264	-1.30299	2.32092	0.0238047	7.78907e-06	5.8021
						450	11.855	11.875	-0.0199703	-0.168454	11.2721	12.4779	10.0666	13.6833	0.000905409	1.94289e-07	3779.82	18	0.533149	-0.0945533	1.16085	-1.28361	2.3499	0.024569	7.221e-06	6.3231
						475	11.855	11.8939	-0.0388996	-0.328128	11.2765	12.5113	10.0807	13.7071	0.000626008	1.36176e-07	4076.94	19	0.558103	-0.0834726	1.19968	-1.26349	2.3797	0.0253405	6.63971e-06	6.86866
						500	12.7811	11.907	0.874127	6.83921	11.2784	12.5355	10.0899	13.724	0.000432615	9.28077e-08	4374.47	20	0.583832	-0.0714477	1.23911	-1.24263	2.4103	0.0261186	6.04638e-06	7.43956
																		21	0.610342	-0.0584551	1.27914	-1.22102	2.4417	0.0269028	5.44307e-06	8.03658
																		22	0.637639	-0.0444724	1.31975	-1.19862	2.4739	0.0276924	4.83001e-06	8.66051
																		23	0.665729	-0.0294781	1.36094	-1.17544	2.5069	0.0284869	4.20844e-06	9.31212
																		24	0.694614	-0.0134518	1.40268	-1.15145	2.54068	0.0292856	3.58031e-06	9.99223
X Generated	Y Predicted	Y Observed																25	0.724301	0.00362571	1.44498	-1.12663	2.57524	0.0300878	2.94621e-06	10.7016
0	0.206046	0																26	0.754791	0.0217725	1.48781	-1.10098	2.61057	0.030893	2.30751e-06	11.4411
1	0.218729																	27	0.786088	0.0410055	1.53117	-1.07449	2.64666	0.0317005	1.66479e-06	12.2115
2	0.231988																	28	0.818193	0.0613403	1.57504	-1.04713	2.68351	0.0325096	1.02219e-06	13.0135
3	0.245838																	29	0.851107	0.0827914	1.61942	-1.01889	2.72111	0.0333198	3.76543e-07	13.8481
4	0.260293																	30	0.884832	0.105372	1.66429	-0.989773	2.75944	0.0341304	-2.68394e-07	14.716
5	0.275366																	31	0.919368	0.129093	1.70964	-0.95976	2.7985	0.0349407	-9.10947e-07	15.6181
6	0.291071																	32	0.954713	0.153966	1.75546	-0.928843	2.83827	0.03575	-1.55133e-06	16.555
7	0.30742																	33	0.990867	0.18	1.80174	-0.897013	2.87875	0.0365579	-2.18792e-06	17.5278
8	0.324427																	34	1.02783	0.207202	1.84846	-0.864265	2.91992	0.0373635	-2.82023e-06	18.537
9	0.342104																	35	1.06559	0.235578	1.89561	-0.83059	2.96178	0.0381663	-3.44625e-06	19.5837
10	0.360462																	36	1.10416	0.265134	1.94319	-0.795986	3.00431	0.0389657	-4.06554e-06	20.6685
11	0.379513																	37	1.14352	0.295872	1.99117	-0.760446	3.04749	0.039761	-4.67671e-06	21.7923
12	0.399268																	38	1.18368	0.327796	2.03956	-0.723969	3.09133	0.0405516	-5.27855e-06	22.9558
13	0.419738																	39	1.22463	0.360905	2.08835	-0.686552	3.1358	0.041337	-5.87312e-06	24.1599
14	0.440933																	40	1.26635	0.395199	2.13751	-0.648196	3.1809	0.0421165	-6.45404e-06	25.4053
15	0.462863																	41	1.30886	0.430676	2.18704	-0.6089	3.22661	0.0428895	-7.02574e-06	26.6929
16	0.485537																	42	1.35213	0.467333	2.23693	-0.568666	3.27292	0.0436555	-7.58378e-06	28.0233
17	0.508962																	43	1.39616	0.505163	2.28717	-0.527496	3.31983	0.0444139	-8.12891e-06	29.3974
18	0.533149																	44	1.44095	0.544162	2.33775	-0.485396	3.3673	0.0451642	-8.6618e-06	30.8159
19	0.558103																	45	1.48649	0.584321	2.38866	-0.442369	3.41535	0.0459059	-9.18048e-06	32.2795
20	0.583832																	46	1.53276	0.625632	2.43989	-0.398422	3.46395	0.0466383	-9.68399e-06	33.7891
21	0.610342																	47	1.57976	0.668084	2.49144	-0.353562	3.51309	0.0473611	-1.01709e-05	35.3453
22	0.637639																	48	1.62748	0.711666	2.5433	-0.307798	3.56276	0.0480737	-1.06423e-05	36.9489
23	0.665729																	49	1.67591	0.756365	2.59545	-0.261138	3.61295	0.0487757	-1.10987e-05	38.6005
24	0.694614																	50	1.72503	0.802167	2.64789	-0.213594	3.66365	0.0494665	-1.15402e-05	40.3009
25	0.724301	0																51	1.77484	0.849058	2.70062	-0.165177	3.71485	0.0501459	-1.19604e-05	42.0508
26	0.754791																	52	1.82532	0.89702	2.75361	-0.1159	3.76653	0.0508132	-1.23646e-05	43.8508
27	0.786088																	53	1.87646	0.946037	2.80688	-0.0657751	3.81869	0.0514682	-1.27516e-05	45.7016
28	0.818193																	54	1.92825	0.996089	2.86041	-0.0148178	3.87132	0.0521105	-1.31201e-05	47.6039
29	0.851107																	55	1.98068	1.04716	2.91419	0.0369568	3.92439	0.0527396	-1.34716e-05	49.5583
30	0.884832																	56	2.03372	1.09922	2.96823	0.0895326	3.97792	0.0533553	-1.38038e-05	51.5655
31	0.919368																	57	2.08738	1.15226	3.0225	0.142893	4.03187	0.0539572	-1.41178e-05	53.626
32	0.954713																	58	2.14163	1.20625	3.07702	0.197019	4.08625	0.0545449	-1.4414e-05	55.7405
33	0.990867																	59	2.19647	1.26117	3.13176	0.251893	4.14104	0.0551182	-1.46916e-05	57.9095
34	1.02783																	60	2.25187	1.317	3.18674	0.307497	4.19623	0.0556769	-1.49496e-05	60.1336
35	1.06559																	61	2.30782	1.3737	3.24193	0.363809	4.25182	0.0562206	-1.51903e-05	62.4134
36	1.10416																	62	2.3643	1.43125	3.29735	0.420809	4.30779	0.0567491	-1.54124e-05	64.7494
37	1.14352																	63	2.42131	1.48964	3.35298	0.478477	4.36414	0.0572622	-1.56158e-05	67.1421
38	1.18368																	64	2.47882	1.54882	3.40882	0.53679	4.42085	0.0577596	-1.58003e-05	69.5922
39	1.22463																	65	2.53682	1.60878	3.46486	0.595727	4.47792	0.0582413	-1.59714e-05	72.1
40	1.26635																	66	2.5953	1.66948	3.52111	0.655266	4.53533	0.058707	-1.61186e-05	74.666
41	1.30886																	67	2.65423	1.7309	3.57756	0.715383	4.59308	0.0591566	-1.62513e-05	77.2907
42	1.35213																	68	2.71361	1.793	3.63421	0.776056	4.65116	0.05959	-1.63669e-05	79.9746
43	1.39616																	69	2.77341	1.85576	3.69105	0.83726	4.70955	0.0600069	-1.64627e-05	82.7181
44	1.44095																	70	2.83361	1.91915	3.74808	0.898973	4.76826	0.0604075	-1.65438e-05	85.5215
45	1.48649																	71	2.89421	1.98313	3.8053	0.96117	4.82726	0.0607914	-1.66082e-05	88.3854
46	1.53276																	72	2.95519	2.04768	3.8627	1.02383	4.88656	0.0611588	-1.66566e-05	91.3101
47	1.57976																	73	3.01653	2.11276	3.92029	1.08692	4.94613	0.0615095	-1.6688e-05	94.2959
48	1.62748																	74	3.0782	2.17835	3.97806	1.15043	5.00598	0.0618435	-1.67052e-05	97.3433
49	1.67591																	75	3.14021	2.24441	4.03601	1.21432	5.0661	0.0621609	-1.67052e-05	100.452
50	1.72503	0																76	3.20252	2.31091	4.09413	1.27858	5.12646	0.0624615	-1.66939e-05	103.624
51	1.77484																	77	3.26513	2.37782	4.15243	1.34318	5.18708	0.0627454	-1.66646e-05	106.858
52	1.82532																	78	3.32801	2.44511	4.2109	1.40809	5.24792	0.0630127	-1.6623e-05	110.154
53	1.87646																	79	3.39115	2.51275	4.26954	1.47329	5.309	0.0632633	-1.65673e-05	113.514
54	1.92825																	80	3.45453	2.58071	4.32834	1.53877	5.37029	0.0634974	-1.65007e-05	116.936
55	1.98068																	81	3.51813	2.64895	4.38732	1.60448	5.43179	0.063715	-1.64181e-05	120.423
56	2.03372																	82	3.58195	2.71745	4.44645	1.67042	5.49348	0.0639161	-1.6325e-05	123.973
57	2.08738																	83	3.64596	2.78618	4.50575	1.73656	5.55536	0.064101	-1.62186e-05	127.587
58	2.14163																	84	3.71015	2.8551	4.5652	1.80287	5.61742	0.0642696	-1.61039e-05	131.265
59	2.19647																	85	3.7745	2.92418	4.62481	1.86934	5.67965	0.0644221	-1.59749e-05	135.007
60	2.25187																	86	3.83899	2.9934	4.68457	1.93594	5.74204	0.0645586	-1.58372e-05	138.814
61	2.30782																	87	3.90361	3.06273	4.74448	2.00265	5.80457	0.0646793	-1.56901e-05	142.685
62	2.3643																	88	3.96834	3.13214	4.80454	2.06944	5.86724	0.0647844	-1.55308e-05	146.621
63	2.42131																	89	4.03317	3.20161	4.86474	2.13631	5.93003	0.0648738	-1.53657e-05	150.622
64	2.47882																	90	4.09808	3.27109	4.92507	2.20322	5.99294	0.064948	-1.51923e-05	154.687
65	2.53682																	91	4.16306	3.34058	4.98555	2.27016	6.05596	0.0650069	-1.50058e-05	158.818
66	2.5953																	92	4.22809	3.41004	5.04615	2.33711	6.11907	0.0650508	-1.48163e-05	163.014
67	2.65423																	93	4.29316	3.47945	5.10687	2.40405	6.18226	0.0650799	-1.46163e-05	167.274
68	2.71361																	94	4.35825	3.54878	5.16772	2.47097	6.24553	0.0650944	-1.44138e-05	171.6
69	2.77341																	95	4.42334	3.61801	5.22868	2.53783	6.30885	0.0650945	-1.42013e-05	175.991
70	2.83361																	96	4.48843	3.68712	5.28974	2.60463	6.37223	0.0650803	-1.39827e-05	180.447
71	2.89421																	97	4.5535	3.75608	5.35091	2.67136	6.43564	0.0650522	-1.37603e-05	184.968
72	2.95519																	98	4.61853	3.82488	5.41218	2.73798	6.49908	0.0650104	-1.35295e-05	189.554
73	3.01653																	99	4.68351	3.8935	5.47353	2.8045	6.56253	0.064955	-1.32941e-05	194.205
74	3.0782																	100	4.74844	3.96191	5.53496	2.87088	6.62599	0.0648863	-1.30577e-05	198.921
75	3.14021	4.44444																101	4.81328	4.0301	5.59646	2.93713	6.68944	0.0648045	-1.28148e-05	203.701
76	3.20252																	102	4.87804	4.09805	5.65803	3.00322	6.75287	0.06471	-1.25676e-05	208.547
77	3.26513																	103	4.9427	4.16575	5.71965	3.06914	6.81626	0.0646028	-1.23174e-05	213.458
78	3.32801																	104	5.00724	4.23317	5.78131	3.13487	6.87961	0.0644834	-1.2068e-05	218.433
79	3.39115																	105	5.07166	4.30031	5.84301	3.20041	6.94291	0.0643519	-1.18117e-05	223.472
80	3.45453																	106	5.13594	4.36715	5.90473	3.26575	7.00614	0.0642085	-1.1552e-05	228.576
81	3.51813																	107	5.20007	4.43368	5.96647	3.33087	7.06928	0.0640537	-1.1293e-05	233.744
82	3.58195																	108	5.26405	4.49989	6.0282	3.39575	7.13234	0.0638875	-1.1032e-05	238.976
83	3.64596																	109	5.32785	4.56576	6.08993	3.4604	7.19529	0.0637103	-1.07709e-05	244.272
84	3.71015																	110	5.39146	4.63129	6.15163	3.5248	7.25813	0.0635223	-1.05059e-05	249.632
85	3.7745																	111	5.45489	4.69647	6.2133	3.58893	7.32084	0.0633238	-1.02414e-05	255.055
86	3.83899																	112	5.51811	4.76129	6.27492	3.6528	7.38341	0.0631151	-9.97943e-06	260.541
87	3.90361																	113	5.58111	4.82574	6.33649	3.7164	7.44583	0.0628964	-9.71228e-06	266.091
88	3.96834																	114	5.6439	4.88982	6.39798	3.7797	7.50809	0.062668	-9.44947e-06	271.703
89	4.03317																	115	5.70645	4.95352	6.45938	3.84272	7.57018	0.0624301	-9.18102e-06	277.379
90	4.09808																	116	5.76875	5.01683	6.52068	3.90543	7.63208	0.0621831	-8.92168e-06	283.116
91	4.16306																	117	5.83081	5.07975	6.58187	3.96784	7.69378	0.0619271	-8.6541e-06	288.916
92	4.22809																	118	5.89261	5.14229	6.64292	4.02993	7.75528	0.0616625	-8.39172e-06	294.778
93	4.29316																	119	5.95413	5.20442	6.70384	4.0917	7.81656	0.0613894	-8.13325e-06	300.701
94	4.35825																	120	6.01538	5.26616	6.7646	4.15315	7.87762	0.0611083	-7.87218e-06	306.686
95	4.42334																	121	6.07635	5.3275	6.82519	4.21426	7.93843	0.0608193	-7.61414e-06	312.732
96	4.48843																	122	6.13702	5.38844	6.8856	4.27504	7.999	0.0605226	-7.35523e-06	318.838
97	4.5535																	123	6.19739	5.44897	6.94581	4.33548	8.0593	0.0602186	-7.10152e-06	325.006
98	4.61853																	124	6.25745	5.5091	7.0058	4.39557	8.11934	0.0599075	-6.85086e-06	331.233
99	4.68351																	125	6.3172	5.56883	7.06558	4.45531	8.1791	0.0595896	-6.60106e-06	337.521
100	4.74844	6.29667																126	6.37663	5.62815	7.12511	4.51469	8.23857	0.059265	-6.35169e-06	343.867
101	4.81328																	127	6.43573	5.68707	7.18439	4.57372	8.29774	0.0589341	-6.10926e-06	350.274
102	4.87804																	128	6.4945	5.74559	7.2434	4.63239	8.3566	0.0585971	-5.86597e-06	356.739
103	4.9427																	129	6.55292	5.80371	7.30213	4.69069	8.41515	0.0582543	-5.62571e-06	363.263
104	5.00724																	130	6.611	5.86143	7.36058	4.74862	8.47338	0.0579058	-5.38979e-06	369.845
105	5.07166																	131	6.66873	5.91874	7.41872	4.80619	8.53127	0.0575519	-5.15516e-06	376.484
106	5.13594																	132	6.7261	5.97567	7.47654	4.86338	8.58883	0.0571928	-4.92401e-06	383.182
107	5.20007																	133	6.78312	6.03219	7.53404	4.92019	8.64604	0.0568288	-4.6972e-06	389.937
108	5.26405																	134	6.83976	6.08832	7.5912	4.97663	8.70289	0.0564602	-4.46865e-06	396.748
109	5.32785																	135	6.89603	6.14406	7.64801	5.03269	8.75938	0.056087	-4.25398e-06	403.616
110	5.39146																	136	6.95193	6.19941	7.70446	5.08837	8.8155	0.0557097	-4.03193e-06	410.54
111	5.45489																	137	7.00745	6.25437	7.76054	5.14366	8.87124	0.0553282	-3.82203e-06	417.52
112	5.51811																	138	7.06259	6.30894	7.81623	5.19857	8.92661	0.054943	-3.60822e-06	424.555
113	5.58111																	139	7.11734	6.36313	7.87154	5.25309	8.98158	0.0545541	-3.39919e-06	431.645
114	5.6439																	140	7.1717	6.41694	7.92645	5.30723	9.03616	0.0541619	-3.201e-06	438.789
115	5.70645																	141	7.22566	6.47036	7.98095	5.36097	9.09035	0.0537664	-2.99934e-06	445.988
116	5.76875																	142	7.27923	6.52341	8.03504	5.41433	9.14412	0.053368	-2.80418e-06	453.24
117	5.83081																	143	7.33239	6.57609	8.0887	5.4673	9.19749	0.0529667	-2.61033e-06	460.546
118	5.89261																	144	7.38516	6.62838	8.14194	5.51987	9.25045	0.0525628	-2.42298e-06	467.905
119	5.95413																	145	7.43752	6.68031	8.19473	5.57206	9.30298	0.0521565	-2.23909e-06	475.316
120	6.01538																	146	7.48947	6.73186	8.24708	5.62385	9.3551	0.051748	-2.05955e-06	482.78
121	6.07635																	147	7.54101	6.78305	8.29898	5.67524	9.40679	0.0513374	-1.88348e-06	490.295
122	6.13702																	148	7.59215	6.83387	8.35042	5.72625	9.45804	0.0509249	-1.70957e-06	497.862
123	6.19739																	149	7.64286	6.88432	8.4014	5.77686	9.50887	0.0505107	-1.5387e-06	505.479
124	6.25745																	150	7.69317	6.93442	8.45192	5.82708	9.55926	0.050095	-1.37303e-06	513.147
125	6.3172	6.29667																151	7.74305	6.98415	8.50196	5.8769	9.60921	0.0496779	-1.2117e-06	520.866
126	6.37663																	152	7.79252	7.03352	8.55153	5.92633	9.65872	0.0492596	-1.05601e-06	528.633
127	6.43573																	153	7.84157	7.08253	8.60062	5.97536	9.70778	0.0488402	-9.00755e-07	536.451
128	6.4945																	154	7.8902	7.13118	8.64922	6.024	9.7564	0.04842	-7.47666e-07	544.316
129	6.55292																	155	7.93841	7.17948	8.69734	6.07225	9.80457	0.0479989	-6.03684e-07	552.231
130	6.611																	156	7.9862	7.22743	8.74497	6.1201	9.8523	0.0475773	-4.59702e-07	560.193
131	6.66873																	157	8.03357	7.27502	8.79211	6.16756	9.89957	0.0471552	-3.21791e-07	568.203
132	6.7261																	158	8.08051	7.32226	8.83876	6.21463	9.9464	0.0467328	-1.85615e-07	576.26
133	6.78312																	159	8.12703	7.36916	8.88491	6.2613	9.99277	0.0463102	-5.20417e-08	584.364
134	6.83976																	160	8.17313	7.4157	8.93056	6.30758	10.0387	0.0458876	7.28584e-08	592.514
135	6.89603																	161	8.21881	7.4619	8.97572	6.35346	10.0841	0.045465	1.96891e-07	600.71
136	6.95193																	162	8.26406	7.50775	9.02038	6.39896	10.1292	0.0450426	3.17454e-07	608.952
137	7.00745																	163	8.30889	7.55325	9.06454	6.44406	10.1737	0.0446206	4.38885e-07	617.238
138	7.06259																	164	8.3533	7.59841	9.1082	6.48878	10.2178	0.0441989	5.49907e-07	625.569
139	7.11734																	165	8.39729	7.64323	9.15136	6.5331	10.2615	0.0437779	6.62664e-07	633.944
140	7.1717																	166	8.44086	7.6877	9.19402	6.57704	10.3047	0.0433575	7.68482e-07	642.364
141	7.22566																	167	8.48401	7.73183	9.23618	6.62058	10.3474	0.0429378	8.71699e-07	650.826
142	7.27923																	168	8.52673	7.77562	9.27785	6.66374	10.3897	0.042519	9.6971e-07	659.331
143	7.33239																	169	8.56904	7.81907	9.31901	6.70651	10.4316	0.0421012	1.06685e-06	667.879
144	7.38516																	170	8.61094	7.86219	9.35969	6.74889	10.473	0.0416845	1.16226e-06	676.469
145	7.43752																	171	8.65241	7.90496	9.39986	6.79089	10.5139	0.0412689	1.25247e-06	685.101
146	7.48947																	172	8.69348	7.9474	9.43955	6.8325	10.5544	0.0408546	1.34354e-06	693.774
147	7.54101																	173	8.73412	7.9895	9.47874	6.87373	10.5945	0.0404416	1.43115e-06	702.488
148	7.59215																	174	8.77436	8.03127	9.51745	6.91458	10.6341	0.0400301	1.50921e-06	711.242
149	7.64286																	175	8.81418	8.0727	9.55567	6.95505	10.6733	0.03962	1.58901e-06	720.037
150	7.69317	6.29667																176	8.8536	8.11379	9.59341	6.99513	10.7121	0.0392116	1.66273e-06	728.87
151	7.74305																	177	8.89261	8.15456	9.63066	7.03484	10.7504	0.0388048	1.73646e-06	737.744
152	7.79252																	178	8.93121	8.19499	9.66743	7.07417	10.7883	0.0383997	1.80845e-06	746.656
153	7.84157																	179	8.96941	8.23508	9.70373	7.11312	10.8257	0.0379965	1.87177e-06	755.606
154	7.8902																	180	9.0072	8.27485	9.73956	7.15169	10.8627	0.0375951	1.94029e-06	764.594
155	7.93841																	181	9.0446	8.31428	9.77491	7.18989	10.8993	0.0371957	1.99927e-06	773.62
156	7.9862																	182	9.0816	8.35339	9.8098	7.22772	10.9355	0.0367983	2.05998e-06	782.683
157	8.03357																	183	9.1182	8.39216	9.84423	7.26517	10.9712	0.0364029	2.11289e-06	791.783
158	8.08051																	184	9.1544	8.43061	9.87819	7.30225	11.0066	0.0360096	2.17274e-06	800.92
159	8.12703																	185	9.19022	8.46873	9.9117	7.33896	11.0415	0.0356185	2.22045e-06	810.092
160	8.17313																	186	9.22564	8.50652	9.94476	7.37531	11.076	0.0352297	2.27596e-06	819.3
161	8.21881																	187	9.26068	8.54398	9.97737	7.41129	11.1101	0.0348431	2.31846e-06	828.543
162	8.26406																	188	9.29533	8.58112	10.0095	7.4469	11.1438	0.0344588	2.36443e-06	837.821
163	8.30889																	189	9.32959	8.61793	10.0413	7.48215	11.177	0.0340769	2.40346e-06	847.134
164	8.3533																	190	9.36348	8.65442	10.0725	7.51704	11.2099	0.0336974	2.44943e-06	856.48
165	8.39729																	191	9.39699	8.69058	10.1034	7.55156	11.2424	0.0333203	2.48499e-06	865.86
166	8.44086																	192	9.43012	8.72642	10.1338	7.58573	11.2745	0.0329458	2.52662e-06	875.274
167	8.48401																	193	9.46288	8.76193	10.1638	7.61954	11.3062	0.0325737	2.55698e-06	884.721
168	8.52673																	194	9.49527	8.79713	10.1934	7.65299	11.3376	0.0322043	2.59254e-06	894.2
169	8.56904																	195	9.52729	8.832	10.2226	7.68609	11.3685	0.0318374	2.6203e-06	903.711
170	8.61094																	196	9.55895	8.86655	10.2513	7.71884	11.3991	0.0314731	2.64979e-06	913.254
171	8.65241																	197	9.59024	8.90078	10.2797	7.75123	11.4292	0.0311115	2.67928e-06	922.829
172	8.69348																	198	9.62117	8.93469	10.3077	7.78328	11.4591	0.0307525	2.69923e-06	932.434
173	8.73412																	199	9.65174	8.96828	10.3352	7.81498	11.4885	0.0303963	2.72699e-06	942.071
174	8.77436																	200	9.68196	9.00156	10.3624	7.84633	11.5176	0.0300428	2.74607e-06	951.738
175	8.81418	9.07722																201	9.71183	9.03451	10.3891	7.87734	11.5463	0.029692	2.76862e-06	961.435
176	8.8536																	202	9.74135	9.06715	10.4155	7.90801	11.5747	0.029344	2.78423e-06	971.161
177	8.89261																	203	9.77052	9.09948	10.4416	7.93834	11.6027	0.0289988	2.80158e-06	980.917
178	8.93121																	204	9.79935	9.13149	10.4672	7.96833	11.6304	0.0286563	2.81546e-06	990.702
179	8.96941																	205	9.82783	9.16319	10.4925	7.99799	11.6577	0.0283167	2.83107e-06	1000.52
180	9.0072																	206	9.85598	9.19457	10.5174	8.02731	11.6847	0.0279799	2.84061e-06	1010.36
181	9.0446																	207	9.88379	9.22564	10.542	8.05629	11.7113	0.027646	2.85189e-06	1020.23
182	9.0816																	208	9.91127	9.2564	10.5662	8.08495	11.7376	0.0273149	2.86229e-06	1030.13
183	9.1182																	209	9.93843	9.28684	10.59	8.11328	11.7636	0.0269867	2.86576e-06	1040.05
184	9.1544																	210	9.96525	9.31698	10.6135	8.14129	11.7892	0.0266613	2.8753e-06	1050
185	9.19022																	211	9.99175	9.34681	10.6367	8.16897	11.8145	0.0263389	2.88224e-06	1059.98
186	9.22564																	212	10.0179	9.37633	10.6595	8.19633	11.8395	0.0260193	2.89005e-06	1069.99
187	9.26068																	213	10.0438	9.40554	10.682	8.22336	11.8642	0.0257026	2.89092e-06	1080.02
188	9.29533																	214	10.0693	9.43445	10.7042	8.25008	11.8886	0.0253888	2.89439e-06	1090.07
189	9.32959																	215	10.0946	9.46305	10.7261	8.27649	11.9126	0.0250778	2.89786e-06	1100.15
190	9.36348																	216	10.1195	9.49135	10.7476	8.30258	11.9364	0.0247698	2.89525e-06	1110.26
191	9.39699																	217	10.1441	9.51934	10.7689	8.32836	11.9599	0.0244647	2.89699e-06	1120.39
192	9.43012																	218	10.1684	9.54703	10.7898	8.35384	11.983	0.0241625	2.89178e-06	1130.55
193	9.46288																	219	10.1924	9.57442	10.8105	8.379	12.0059	0.0238631	2.89092e-06	1140.73
194	9.49527																	220	10.2161	9.6015	10.8308	8.40386	12.0284	0.0235667	2.88571e-06	1150.93
195	9.52729																	221	10.2396	9.62829	10.8508	8.42842	12.0507	0.0232731	2.88224e-06	1161.16
196	9.55895																	222	10.2627	9.65478	10.8706	8.45268	12.0727	0.0229824	2.87704e-06	1171.41
197	9.59024																	223	10.2855	9.68097	10.8901	8.47664	12.0944	0.0226946	2.8727e-06	1181.69
198	9.62117																	224	10.3081	9.70687	10.9093	8.50031	12.1159	0.0224097	2.86576e-06	1191.98
199	9.65174																	225	10.3304	9.73247	10.9282	8.52368	12.137	0.0221276	2.85796e-06	1202.3
200	9.68196	9.07722																226	10.3523	9.75777	10.9469	8.54677	12.1579	0.0218484	2.84408e-06	1212.65
201	9.71183																	227	10.3741	9.78278	10.9653	8.56956	12.1785	0.0215721	2.83974e-06	1223.01
202	9.74135																	228	10.3955	9.8075	10.9835	8.59207	12.1989	0.0212986	2.82673e-06	1233.39
203	9.77052																	229	10.4167	9.83193	11.0014	8.6143	12.219	0.0210279	2.82326e-06	1243.8
204	9.79935																	230	10.4375	9.85607	11.019	8.63624	12.2388	0.02076	2.80678e-06	1254.23
205	9.82783																	231	10.4582	9.87992	11.0364	8.6579	12.2584	0.0204949	2.79551e-06	1264.67
206	9.85598																	232	10.4785	9.90348	11.0536	8.67929	12.2778	0.0202326	2.78336e-06	1275.14
207	9.88379																	233	10.4986	9.92676	11.0705	8.70041	12.2969	0.0199732	2.77382e-06	1285.63
208	9.91127																	234	10.5185	9.94975	11.0872	8.72125	12.3157	0.0197165	2.76081e-06	1296.14
209	9.93843																	235	10.5381	9.97246	11.1037	8.74182	12.3343	0.0194625	2.74433e-06	1306.67
210	9.96525																	236	10.5574	9.99488	11.1199	8.76213	12.3527	0.0192113	2.73045e-06	1317.22
211	9.99175																	237	10.5765	10.017	11.136	8.78217	12.3708	0.0189628	2.71571e-06	1327.78
212	10.0179																	238	10.5953	10.0389	11.1518	8.80195	12.3887	0.018717	2.69923e-06	1338.37
213	10.0438																	239	10.6139	10.0605	11.1674	8.82147	12.4064	0.018474	2.68275e-06	1348.97
214	10.0693																	240	10.6323	10.0818	11.1828	8.84073	12.4238	0.0182336	2.67147e-06	1359.6
215	10.0946																	241	10.6504	10.1028	11.198	8.85974	12.4411	0.0179959	2.65239e-06	1370.24
216	10.1195																	242	10.6683	10.1236	11.213	8.8785	12.4581	0.0177609	2.63591e-06	1380.9
217	10.1441																	243	10.6859	10.144	11.2278	8.897	12.4748	0.0175284	2.6203e-06	1391.57
218	10.1684																	244	10.7033	10.1643	11.2424	8.91526	12.4914	0.0172986	2.60729e-06	1402.27
219	10.1924																	245	10.7205	10.1842	11.2568	8.93328	12.5078	0.0170715	2.58734e-06	1412.98
220	10.2161																	246	10.7375	10.2039	11.2711	8.95105	12.5239	0.0168469	2.56566e-06	1423.71
221	10.2396																	247	10.7542	10.2233	11.2852	8.96858	12.5398	0.0166248	2.55091e-06	1434.46
222	10.2627																	248	10.7707	10.2424	11.2991	8.98587	12.5556	0.0164053	2.53096e-06	1445.22
223	10.2855																	249	10.787	10.2613	11.3128	9.00293	12.5711	0.0161884	2.51535e-06	1456
224	10.3081																	250	10.8031	10.2799	11.3263	9.01975	12.5865	0.0159739	2.49366e-06	1466.79
225	10.3304	10.9278																251	10.819	10.2982	11.3397	9.03635	12.6016	0.015762	2.47372e-06	1477.6
226	10.3523																	252	10.8346	10.3163	11.3529	9.05271	12.6165	0.0155525	2.45463e-06	1488.43
227	10.3741																	253	10.8501	10.3341	11.366	9.06885	12.6313	0.0153455	2.43642e-06	1499.27
228	10.3955																	254	10.8653	10.3517	11.3789	9.08477	12.6459	0.015141	2.4182e-06	1510.13
229	10.4167																	255	10.8804	10.369	11.3917	9.10046	12.6603	0.0149388	2.39739e-06	1521
230	10.4375																	256	10.8952	10.3861	11.4043	9.11594	12.6745	0.014739	2.37831e-06	1531.89
231	10.4582																	257	10.9098	10.4029	11.4168	9.1312	12.6885	0.0145417	2.35836e-06	1542.79
232	10.4785																	258	10.9243	10.4195	11.4291	9.14625	12.7023	0.0143467	2.33581e-06	1553.71
233	10.4986																	259	10.9385	10.4358	11.4413	9.16108	12.716	0.014154	2.32019e-06	1564.64
234	10.5185																	260	10.9526	10.4519	11.4533	9.17571	12.7295	0.0139636	2.30111e-06	1575.59
235	10.5381																	261	10.9665	10.4677	11.4652	9.19013	12.7428	0.0137756	2.27943e-06	1586.55
236	10.5574																	262	10.9801	10.4833	11.477	9.20435	12.7559	0.0135898	2.25948e-06	1597.52
237	10.5765																	263	10.9936	10.4986	11.4887	9.21836	12.7689	0.0134063	2.2404e-06	1608.51
238	10.5953																	264	11.007	10.5137	11.5002	9.23217	12.7817	0.013225	2.21958e-06	1619.51
239	10.6139																	265	11.0201	10.5286	11.5116	9.24579	12.7944	0.0130459	2.19789e-06	1630.52
240	10.6323																	266	11.0331	10.5432	11.5229	9.25921	12.8069	0.0128691	2.17621e-06	1641.55
241	10.6504																	267	11.0458	10.5576	11.534	9.27244	12.8192	0.0126944	2.15886e-06	1652.59
242	10.6683																	268	11.0584	10.5718	11.5451	9.28547	12.8314	0.0125219	2.13631e-06	1663.64
243	10.6859																	269	11.0709	10.5857	11.556	9.29832	12.8434	0.0123515	2.11983e-06	1674.7
244	10.7033																	270	11.0831	10.5994	11.5668	9.31099	12.8553	0.0121832	2.09728e-06	1685.78
245	10.7205																	271	11.0952	10.6129	11.5775	9.32346	12.867	0.012017	2.07733e-06	1696.87
246	10.7375																	272	11.1072	10.6262	11.5882	9.33576	12.8786	0.0118529	2.05218e-06	1707.97
247	10.7542																	273	11.119	10.6393	11.5986	9.34788	12.89	0.0116909	2.0331e-06	1719.08
248	10.7707																	274	11.1306	10.6521	11.609	9.35982	12.9013	0.0115309	2.01488e-06	1730.21
249	10.787																	275	11.142	10.6647	11.6193	9.37158	12.9124	0.0113729	1.9932e-06	1741.35
250	10.8031	10.9278																276	11.1533	10.6771	11.6295	9.38318	12.9234	0.0112169	1.97151e-06	1752.49
251	10.819																	277	11.1644	10.6893	11.6396	9.3946	12.9343	0.0110629	1.9559e-06	1763.65
252	10.8346																	278	11.1754	10.7013	11.6496	9.40585	12.945	0.0109108	1.92988e-06	1774.82
253	10.8501																	279	11.1863	10.713	11.6595	9.41694	12.9556	0.0107607	1.916e-06	1786
254	10.8653																	280	11.197	10.7246	11.6693	9.42786	12.9661	0.0106125	1.89605e-06	1797.2
255	10.8804																	281	11.2075	10.736	11.679	9.43862	12.9764	0.0104661	1.8735e-06	1808.4
256	10.8952																	282	11.2179	10.7471	11.6886	9.44922	12.9866	0.0103217	1.85529e-06	1819.61
257	10.9098																	283	11.2281	10.7581	11.6982	9.45966	12.9966	0.0101791	1.83447e-06	1830.83
258	10.9243																	284	11.2382	10.7689	11.7076	9.46994	13.0066	0.0100383	1.81712e-06	1842.07
259	10.9385																	285	11.2482	10.7795	11.717	9.48008	13.0164	0.00989939	1.80064e-06	1853.31
260	10.9526																	286	11.258	10.7898	11.7262	9.49005	13.026	0.00976224	1.77636e-06	1864.56
261	10.9665																	287	11.2677	10.8	11.7354	9.49988	13.0356	0.00962687	1.75901e-06	1875.83
262	10.9801																	288	11.2773	10.8101	11.7445	9.50956	13.045	0.00949325	1.73559e-06	1887.1
263	10.9936																	289	11.2867	10.8199	11.7536	9.5191	13.0544	0.00936138	1.71998e-06	1898.38
264	11.007																	290	11.296	10.8295	11.7625	9.52849	13.0636	0.00923122	1.69743e-06	1909.67
265	11.0201																	291	11.3052	10.839	11.7714	9.53773	13.0726	0.00910276	1.68008e-06	1920.97
266	11.0331																	292	11.3142	10.8483	11.7801	9.54684	13.0816	0.00897598	1.65926e-06	1932.28
267	11.0458																	293	11.3231	10.8574	11.7889	9.55581	13.0905	0.00885086	1.64192e-06	1943.6
268	11.0584																	294	11.3319	10.8664	11.7975	9.56464	13.0992	0.00872739	1.62283e-06	1954.93
269	11.0709																	295	11.3406	10.8752	11.806	9.57334	13.1079	0.00860554	1.60982e-06	1966.26
270	11.0831																	296	11.3491	10.8838	11.8145	9.5819	13.1164	0.00848529	1.58554e-06	1977.61
271	11.0952																	297	11.3576	10.8922	11.8229	9.59034	13.1248	0.00836664	1.56906e-06	1988.96
272	11.1072																	298	11.3659	10.9005	11.8312	9.59864	13.1331	0.00824955	1.54824e-06	2000.32
273	11.119																	299	11.3741	10.9087	11.8395	9.60681	13.1413	0.00813401	1.53089e-06	2011.69
274	11.1306																	300	11.3821	10.9166	11.8477	9.61486	13.1494	0.00802001	1.52049e-06	2023.07
275	11.142	10.9278																301	11.3901	10.9245	11.8558	9.62279	13.1574	0.00790752	1.49533e-06	2034.46
276	11.1533																	302	11.398	10.9321	11.8638	9.63059	13.1653	0.00779653	1.47798e-06	2045.85
277	11.1644																	303	11.4057	10.9396	11.8718	9.63828	13.1731	0.00768702	1.46324e-06	2057.25
278	11.1754																	304	11.4133	10.947	11.8797	9.64584	13.1808	0.00757897	1.44763e-06	2068.66
279	11.1863																	305	11.4209	10.9542	11.8875	9.65329	13.1884	0.00747237	1.42768e-06	2080.08
280	11.197																	306	11.4283	10.9613	11.8952	9.66062	13.1959	0.00736719	1.4112e-06	2091.51
281	11.2075																	307	11.4356	10.9683	11.9029	9.66784	13.2034	0.00726343	1.39732e-06	2102.94
282	11.2179																	308	11.4428	10.9751	11.9105	9.67494	13.2107	0.00716106	1.37303e-06	2114.38
283	11.2281																	309	11.4499	10.9817	11.9181	9.68193	13.2179	0.00706007	1.35916e-06	2125.82
284	11.2382																	310	11.4569	10.9883	11.9256	9.68882	13.225	0.00696044	1.34268e-06	2137.28
285	11.2482																	311	11.4638	10.9947	11.933	9.6956	13.2321	0.00686215	1.32706e-06	2148.74
286	11.258																	312	11.4707	11.001	11.9403	9.70227	13.239	0.00676519	1.31319e-06	2160.2
287	11.2677																	313	11.4774	11.0071	11.9476	9.70883	13.2459	0.00666954	1.29584e-06	2171.68
288	11.2773																	314	11.484	11.0131	11.9549	9.7153	13.2527	0.00657519	1.28023e-06	2183.16
289	11.2867																	315	11.4905	11.019	11.962	9.72166	13.2594	0.00648211	1.26288e-06	2194.65
290	11.296																	316	11.497	11.0248	11.9691	9.72792	13.266	0.00639031	1.25074e-06	2206.14
291	11.3052																	317	11.5033	11.0305	11.9761	9.73408	13.2725	0.00629975	1.23599e-06	2217.64
292	11.3142																	318	11.5096	11.036	11.9831	9.74015	13.279	0.00621042	1.21864e-06	2229.15
293	11.3231																	319	11.5157	11.0415	11.99	9.74612	13.2853	0.00612231	1.2013e-06	2240.66
294	11.3319																	320	11.5218	11.0468	11.9968	9.752	13.2916	0.0060354	1.18655e-06	2252.18
295	11.3406																	321	11.5278	11.052	12.0036	9.75778	13.2978	0.00594968	1.17007e-06	2263.7
296	11.3491																	322	11.5337	11.0571	12.0103	9.76347	13.3039	0.00586513	1.15619e-06	2275.23
297	11.3576																	323	11.5395	11.0621	12.0169	9.76907	13.31	0.00578174	1.14405e-06	2286.77
298	11.3659																	324	11.5453	11.067	12.0235	9.77458	13.316	0.0056995	1.12844e-06	2298.31
299	11.3741																	325	11.5509	11.0718	12.0301	9.78001	13.3218	0.00561838	1.11283e-06	2309.86
300	11.3821	10.9278																326	11.5565	11.0765	12.0365	9.78535	13.3277	0.00553838	1.09981e-06	2321.41
301	11.3901																	327	11.562	11.0811	12.0429	9.7906	13.3334	0.00545948	1.08854e-06	2332.97
302	11.398																	328	11.5674	11.0856	12.0493	9.79577	13.3391	0.00538166	1.07119e-06	2344.54
303	11.4057																	329	11.5728	11.09	12.0555	9.80086	13.3447	0.00530492	1.05905e-06	2356.11
304	11.4133																	330	11.578	11.0943	12.0618	9.80587	13.3502	0.00522923	1.0417e-06	2367.68
305	11.4209																	331	11.5832	11.0985	12.0679	9.81079	13.3557	0.00515459	1.02956e-06	2379.26
306	11.4283																	332	11.5883	11.1027	12.074	9.81564	13.361	0.00508098	1.01742e-06	2390.85
307	11.4356																	333	11.5934	11.1067	12.0801	9.82041	13.3664	0.0050084	1.00267e-06	2402.44
308	11.4428																	334	11.5984	11.1107	12.0861	9.8251	13.3716	0.00493681	9.91394e-07	2414.04
309	11.4499																	335	11.6033	11.1145	12.092	9.82972	13.3768	0.00486622	9.78384e-07	2425.64
310	11.4569																	336	11.6081	11.1183	12.0979	9.83427	13.3819	0.00479661	9.66241e-07	2437.24
311	11.4638																	337	11.6129	11.122	12.1037	9.83874	13.387	0.00472797	9.52363e-07	2448.85
312	11.4707																	338	11.6176	11.1257	12.1094	9.84314	13.392	0.00466027	9.4022e-07	2460.47
313	11.4774																	339	11.6222	11.1292	12.1151	9.84747	13.3969	0.00459353	9.2721e-07	2472.09
314	11.484																	340	11.6267	11.1327	12.1208	9.85173	13.4017	0.00452771	9.16801e-07	2483.71
315	11.4905																	341	11.6312	11.1361	12.1264	9.85592	13.4065	0.00446281	9.0726e-07	2495.34
316	11.497																	342	11.6357	11.1394	12.1319	9.86004	13.4113	0.00439881	8.89913e-07	2506.98
317	11.5033																	343	11.64	11.1427	12.1374	9.8641	13.416	0.00433571	8.79505e-07	2518.61
318	11.5096																	344	11.6443	11.1459	12.1428	9.86809	13.4206	0.00427348	8.69096e-07	2530.26
319	11.5157																	345	11.6486	11.149	12.1482	9.87202	13.4251	0.00421213	8.57821e-07	2541.9
320	11.5218																	346	11.6528	11.1521	12.1535	9.87588	13.4296	0.00415164	8.46545e-07	2553.55
321	11.5278																	347	11.6569	11.155	12.1587	9.87968	13.4341	0.00409199	8.35269e-07	2565.21
322	11.5337																	348	11.6609	11.158	12.1639	9.88342	13.4385	0.00403318	8.24861e-07	2576.87
323	11.5395																	349	11.6649	11.1608	12.1691	9.8871	13.4428	0.0039752	8.11851e-07	2588.53
324	11.5453																	350	11.6689	11.1636	12.1742	9.89072	13.4471	0.00391803	8.03177e-07	2600.2
325	11.5509	10.9278																351	11.6728	11.1664	12.1792	9.89429	13.4513	0.00386166	7.91034e-07	2611.87
326	11.5565																	352	11.6766	11.169	12.1842	9.89779	13.4554	0.00380608	7.86697e-07	2623.54
327	11.562																	353	11.6804	11.1716	12.1891	9.90124	13.4596	0.00375129	7.72819e-07	2635.22
328	11.5674																	354	11.6841	11.1742	12.194	9.90463	13.4636	0.00369727	7.61544e-07	2646.9
329	11.5728																	355	11.6878	11.1767	12.1989	9.90796	13.4676	0.00364401	7.50268e-07	2658.59
330	11.578																	356	11.6914	11.1792	12.2037	9.91125	13.4716	0.00359149	7.38125e-07	2670.28
331	11.5832																	357	11.695	11.1816	12.2084	9.91447	13.4755	0.00353972	7.31186e-07	2681.97
332	11.5883																	358	11.6985	11.1839	12.2131	9.91765	13.4793	0.00348868	7.20778e-07	2693.67
333	11.5934																	359	11.702	11.1862	12.2177	9.92077	13.4831	0.00343836	7.14706e-07	2705.37
334	11.5984																	360	11.7054	11.1884	12.2223	9.92385	13.4869	0.00338876	6.98226e-07	2717.07
335	11.6033																	361	11.7087	11.1906	12.2268	9.92687	13.4906	0.00333985	6.88685e-07	2728.78
336	11.6081																	362	11.712	11.1928	12.2313	9.92985	13.4942	0.00329163	6.82614e-07	2740.49
337	11.6129																	363	11.7153	11.1949	12.2358	9.93277	13.4979	0.0032441	6.68736e-07	2752.2
338	11.6176																	364	11.7185	11.1969	12.2402	9.93565	13.5014	0.00319724	6.65266e-07	2763.92
339	11.6222																	365	11.7217	11.1989	12.2445	9.93848	13.5049	0.00315105	6.56593e-07	2775.64
340	11.6267																	366	11.7248	11.2009	12.2488	9.94127	13.5084	0.00310551	6.4445e-07	2787.36
341	11.6312																	367	11.7279	11.2028	12.253	9.94401	13.5118	0.00306061	6.37511e-07	2799.09
342	11.6357																	368	11.731	11.2047	12.2573	9.9467	13.5152	0.00301636	6.30572e-07	2810.82
343	11.64																	369	11.734	11.2065	12.2614	9.94935	13.5186	0.00297273	6.16694e-07	2822.55
344	11.6443																	370	11.7369	11.2083	12.2655	9.95196	13.5218	0.00292972	6.09755e-07	2834.29
345	11.6486																	371	11.7398	11.21	12.2696	9.95453	13.5251	0.00288732	6.04551e-07	2846.03
346	11.6528																	372	11.7427	11.2117	12.2736	9.95705	13.5283	0.00284553	5.9848e-07	2857.77
347	11.6569																	373	11.7455	11.2134	12.2776	9.95953	13.5315	0.00280433	5.82867e-07	2869.51
348	11.6609																	374	11.7483	11.2151	12.2815	9.96197	13.5346	0.00276372	5.81132e-07	2881.26
349	11.6649																	375	11.751	11.2167	12.2854	9.96437	13.5377	0.00272369	5.72459e-07	2893.01
350	11.6689	11.855																376	11.7537	11.2182	12.2893	9.96674	13.5407	0.00268423	5.66387e-07	2904.76
351	11.6728																	377	11.7564	11.2197	12.2931	9.96906	13.5437	0.00264533	5.55112e-07	2916.52
352	11.6766																	378	11.759	11.2212	12.2968	9.97134	13.5467	0.00260698	5.4904e-07	2928.27
353	11.6804																	379	11.7616	11.2227	12.3005	9.97359	13.5496	0.00256918	5.38632e-07	2940.03
354	11.6841																	380	11.7642	11.2241	12.3042	9.9758	13.5525	0.00253193	5.30825e-07	2951.8
355	11.6878																	381	11.7667	11.2255	12.3078	9.97798	13.5554	0.0024952	5.23019e-07	2963.56
356	11.6914																	382	11.7692	11.2269	12.3114	9.98012	13.5582	0.002459	5.14346e-07	2975.33
357	11.695																	383	11.7716	11.2282	12.315	9.98222	13.561	0.00242332	5.10876e-07	2987.1
358	11.6985																	384	11.774	11.2295	12.3185	9.98429	13.5637	0.00238815	5.01335e-07	2998.87
359	11.702																	385	11.7764	11.2308	12.322	9.98633	13.5664	0.00235348	4.96131e-07	3010.65
360	11.7054																	386	11.7787	11.232	12.3254	9.98833	13.5691	0.00231931	4.91794e-07	3022.43
361	11.7087																	387	11.781	11.2332	12.3288	9.9903	13.5717	0.00228562	4.80518e-07	3034.21
362	11.712																	388	11.7833	11.2344	12.3321	9.99224	13.5743	0.00225242	4.74447e-07	3045.99
363	11.7153																	389	11.7855	11.2356	12.3355	9.99414	13.5769	0.0022197	4.7011e-07	3057.77
364	11.7185																	390	11.7877	11.2367	12.3387	9.99602	13.5794	0.00218745	4.64039e-07	3069.56
365	11.7217																	391	11.7899	11.2378	12.342	9.99786	13.5819	0.00215565	4.5363e-07	3081.35
366	11.7248																	392	11.792	11.2389	12.3452	9.99967	13.5844	0.00212432	4.5363e-07	3093.14
367	11.7279																	393	11.7941	11.2399	12.3483	10.0015	13.5868	0.00209343	4.43222e-07	3104.93
368	11.731																	394	11.7962	11.241	12.3515	10.0032	13.5892	0.00206299	4.33681e-07	3116.73
369	11.734																	395	11.7983	11.242	12.3545	10.0049	13.5916	0.00203299	4.30211e-07	3128.52
370	11.7369																	396	11.8003	11.243	12.3576	10.0066	13.5939	0.00200341	4.2414e-07	3140.32
371	11.7398																	397	11.8023	11.2439	12.3606	10.0083	13.5962	0.00197427	4.18936e-07	3152.12
372	11.7427																	398	11.8042	11.2449	12.3636	10.0099	13.5985	0.00194554	4.11997e-07	3163.93
373	11.7455																	399	11.8062	11.2458	12.3665	10.0116	13.6008	0.00191722	4.06793e-07	3175.73
374	11.7483																	400	11.8081	11.2467	12.3695	10.0131	13.603	0.00188931	4.02456e-07	3187.54
375	11.751	11.855																401	11.8099	11.2476	12.3723	10.0147	13.6052	0.00186181	4.00721e-07	3199.35
376	11.7537																	402	11.8118	11.2484	12.3752	10.0162	13.6073	0.0018347	3.9118e-07	3211.16
377	11.7564																	403	11.8136	11.2492	12.378	10.0178	13.6095	0.00180798	3.80772e-07	3222.97
378	11.759																	404	11.8154	11.25	12.3808	10.0192	13.6116	0.00178164	3.79037e-07	3234.79
379	11.7616																	405	11.8172	11.2508	12.3835	10.0207	13.6137	0.00175569	3.72098e-07	3246.6
380	11.7642																	406	11.8189	11.2516	12.3862	10.0221	13.6157	0.00173011	3.68629e-07	3258.42
381	11.7667																	407	11.8206	11.2524	12.3889	10.0236	13.6177	0.0017049	3.63425e-07	3270.24
382	11.7692																	408	11.8223	11.2531	12.3915	10.0249	13.6197	0.00168005	3.59955e-07	3282.06
383	11.7716																	409	11.824	11.2538	12.3942	10.0263	13.6217	0.00165556	3.52149e-07	3293.89
384	11.774																	410	11.8256	11.2545	12.3967	10.0277	13.6236	0.00163143	3.50414e-07	3305.71
385	11.7764																	411	11.8273	11.2552	12.3993	10.029	13.6255	0.00160764	3.41741e-07	3317.54
386	11.7787																	412	11.8289	11.2559	12.4018	10.0303	13.6274	0.0015842	3.36536e-07	3329.37
387	11.781																	413	11.8304	11.2565	12.4043	10.0316	13.6293	0.00156109	3.34802e-07	3341.19
388	11.7833																	414	11.832	11.2572	12.4068	10.0328	13.6311	0.00153832	3.27863e-07	3353.03
389	11.7855																	415	11.8335	11.2578	12.4092	10.0341	13.633	0.00151588	3.2873e-07	3364.86
390	11.7877																	416	11.835	11.2584	12.4116	10.0353	13.6347	0.00149376	3.22659e-07	3376.69
391	11.7899																	417	11.8365	11.259	12.414	10.0365	13.6365	0.00147197	3.1572e-07	3388.53
392	11.792																	418	11.838	11.2596	12.4163	10.0376	13.6383	0.00145048	3.13985e-07	3400.37
393	11.7941																	419	11.8394	11.2602	12.4186	10.0388	13.64	0.00142931	3.07913e-07	3412.2
394	11.7962																	420	11.8408	11.2607	12.4209	10.0399	13.6417	0.00140845	3.01842e-07	3424.04
395	11.7983																	421	11.8422	11.2612	12.4232	10.0411	13.6434	0.00138789	3.00975e-07	3435.89
396	11.8003																	422	11.8436	11.2618	12.4254	10.0422	13.645	0.00136762	2.94036e-07	3447.73
397	11.8023																	423	11.8449	11.2623	12.4276	10.0433	13.6466	0.00134765	2.86229e-07	3459.57
398	11.8042																	424	11.8463	11.2628	12.4298	10.0443	13.6482	0.00132797	2.87097e-07	3471.42
399	11.8062																	425	11.8476	11.2633	12.4319	10.0454	13.6498	0.00130858	2.78423e-07	3483.27
400	11.8081	11.855																426	11.8489	11.2637	12.4341	10.0464	13.6514	0.00128946	2.74086e-07	3495.11
401	11.8099																	427	11.8502	11.2642	12.4362	10.0474	13.6529	0.00127062	2.74086e-07	3506.96
402	11.8118																	428	11.8514	11.2646	12.4382	10.0484	13.6545	0.00125206	2.70617e-07	3518.81
403	11.8136																	429	11.8527	11.2651	12.4403	10.0494	13.656	0.00123376	2.68882e-07	3530.67
404	11.8154																	430	11.8539	11.2655	12.4423	10.0504	13.6575	0.00121574	2.61076e-07	3542.52
405	11.8172																	431	11.8551	11.2659	12.4443	10.0513	13.6589	0.00119797	2.60209e-07	3554.37
406	11.8189																	432	11.8563	11.2663	12.4463	10.0522	13.6604	0.00118046	2.56739e-07	3566.23
407	11.8206																	433	11.8575	11.2667	12.4482	10.0532	13.6618	0.0011632	2.51535e-07	3578.09
408	11.8223																	434	11.8586	11.2671	12.4502	10.0541	13.6632	0.0011462	2.45463e-07	3589.95
409	11.824																	435	11.8598	11.2675	12.4521	10.0549	13.6646	0.00112944	2.41994e-07	3601.8
410	11.8256																	436	11.8609	11.2679	12.4539	10.0558	13.666	0.00111292	2.41994e-07	3613.66
411	11.8273																	437	11.862	11.2682	12.4558	10.0567	13.6673	0.00109665	2.35055e-07	3625.53
412	11.8289																	438	11.8631	11.2686	12.4576	10.0575	13.6686	0.00108061	2.35055e-07	3637.39
413	11.8304																	439	11.8642	11.2689	12.4594	10.0584	13.67	0.0010648	2.28116e-07	3649.25
414	11.832																	440	11.8652	11.2692	12.4612	10.0592	13.6713	0.00104923	2.22912e-07	3661.12
415	11.8335																	441	11.8663	11.2695	12.463	10.06	13.6725	0.00103388	2.2031e-07	3672.98
416	11.835																	442	11.8673	11.2699	12.4647	10.0608	13.6738	0.00101875	2.18575e-07	3684.85
417	11.8365																	443	11.8683	11.2702	12.4664	10.0615	13.675	0.00100385	2.19443e-07	3696.72
418	11.838																	444	11.8693	11.2705	12.4681	10.0623	13.6763	0.00098916	2.1684e-07	3708.59
419	11.8394																	445	11.8703	11.2707	12.4698	10.0631	13.6775	0.000974685	2.12504e-07	3720.46
420	11.8408																	446	11.8712	11.271	12.4714	10.0638	13.6787	0.00096042	2.04697e-07	3732.33
421	11.8422																	447	11.8722	11.2713	12.4731	10.0645	13.6799	0.000946363	2.04697e-07	3744.2
422	11.8436																	448	11.8731	11.2716	12.4747	10.0652	13.681	0.000932511	1.99493e-07	3756.07
423	11.8449																	449	11.8741	11.2718	12.4763	10.0659	13.6822	0.000918861	1.98626e-07	3767.94
424	11.8463																	450	11.875	11.2721	12.4779	10.0666	13.6833	0.000905409	1.94289e-07	3779.82
425	11.8476	11.855																451	11.8759	11.2723	12.4794	10.0673	13.6844	0.000892153	1.89085e-07	3791.69
426	11.8489																	452	11.8768	11.2726	12.4809	10.068	13.6855	0.00087909	1.86483e-07	3803.57
427	11.8502																	453	11.8776	11.2728	12.4825	10.0686	13.6866	0.000866218	1.8735e-07	3815.45
428	11.8514																	454	11.8785	11.273	12.484	10.0693	13.6877	0.000853533	1.83881e-07	3827.33
429	11.8527																	455	11.8793	11.2732	12.4854	10.0699	13.6887	0.000841033	1.86483e-07	3839.21
430	11.8539																	456	11.8802	11.2734	12.4869	10.0706	13.6898	0.000828715	1.77809e-07	3851.08
431	11.8551																	457	11.881	11.2737	12.4883	10.0712	13.6908	0.000816577	1.82146e-07	3862.97
432	11.8563																	458	11.8818	11.2739	12.4898	10.0718	13.6918	0.000804616	1.72605e-07	3874.85
433	11.8575																	459	11.8826	11.274	12.4912	10.0724	13.6928	0.000792829	1.75207e-07	3886.73
434	11.8586																	460	11.8834	11.2742	12.4925	10.073	13.6938	0.000781214	1.68268e-07	3898.61
435	11.8598																	461	11.8842	11.2744	12.4939	10.0735	13.6948	0.000769768	1.69136e-07	3910.5
436	11.8609																	462	11.8849	11.2746	12.4953	10.0741	13.6958	0.00075849	1.63064e-07	3922.38
437	11.862																	463	11.8857	11.2748	12.4966	10.0747	13.6967	0.000747376	1.60462e-07	3934.27
438	11.8631																	464	11.8864	11.2749	12.4979	10.0752	13.6976	0.000736424	1.60462e-07	3946.15
439	11.8642																	465	11.8872	11.2751	12.4992	10.0757	13.6986	0.000725632	1.58727e-07	3958.04
440	11.8652																	466	11.8879	11.2753	12.5005	10.0763	13.6995	0.000714997	1.53523e-07	3969.93
441	11.8663																	467	11.8886	11.2754	12.5018	10.0768	13.7004	0.000704518	1.52656e-07	3981.81
442	11.8673																	468	11.8893	11.2756	12.503	10.0773	13.7013	0.000694191	1.53523e-07	3993.7
443	11.8683																	469	11.89	11.2757	12.5042	10.0778	13.7021	0.000684016	1.44849e-07	4005.59
444	11.8693																	470	11.8907	11.2758	12.5055	10.0783	13.703	0.000673989	1.47451e-07	4017.48
445	11.8703																	471	11.8913	11.276	12.5067	10.0788	13.7038	0.000664108	1.43115e-07	4029.37
446	11.8712																	472	11.892	11.2761	12.5078	10.0793	13.7047	0.000654372	1.39645e-07	4041.27
447	11.8722																	473	11.8926	11.2762	12.509	10.0798	13.7055	0.000644778	1.4138e-07	4053.16
448	11.8731																	474	11.8933	11.2764	12.5102	10.0802	13.7063	0.000635324	1.40513e-07	4065.05
449	11.8741																	475	11.8939	11.2765	12.5113	10.0807	13.7071	0.000626008	1.36176e-07	4076.94
450	11.875	11.855																476	11.8945	11.2766	12.5124	10.0811	13.7079	0.000616829	1.34441e-07	4088.84
451	11.8759																	477	11.8951	11.2767	12.5136	10.0816	13.7087	0.000607783	1.32706e-07	4100.73
452	11.8768																	478	11.8957	11.2768	12.5146	10.082	13.7095	0.00059887	1.37043e-07	4112.63
453	11.8776																	479	11.8963	11.2769	12.5157	10.0824	13.7102	0.000590087	1.26635e-07	4124.53
454	11.8785																	480	11.8969	11.277	12.5168	10.0828	13.711	0.000581432	1.25767e-07	4136.42
455	11.8793																	481	11.8975	11.2771	12.5179	10.0833	13.7117	0.000572904	1.26635e-07	4148.32
456	11.8802																	482	11.8981	11.2772	12.5189	10.0837	13.7125	0.0005645	1.24033e-07	4160.22
457	11.881																	483	11.8986	11.2773	12.5199	10.0841	13.7132	0.00055622	1.23165e-07	4172.12
458	11.8818																	484	11.8992	11.2774	12.5209	10.0845	13.7139	0.00054806	1.20563e-07	4184.01
459	11.8826																	485	11.8997	11.2775	12.522	10.0848	13.7146	0.00054002	1.17094e-07	4195.91
460	11.8834																	486	11.9003	11.2776	12.5229	10.0852	13.7153	0.000532097	1.15359e-07	4207.81
461	11.8842																	487	11.9008	11.2776	12.5239	10.0856	13.716	0.000524291	1.13624e-07	4219.71
462	11.8849																	488	11.9013	11.2777	12.5249	10.086	13.7166	0.000516598	1.13624e-07	4231.61
463	11.8857																	489	11.9018	11.2778	12.5258	10.0863	13.7173	0.000509018	1.06685e-07	4243.52
464	11.8864																	490	11.9023	11.2779	12.5268	10.0867	13.718	0.000501549	1.11022e-07	4255.42
465	11.8872																	491	11.9028	11.2779	12.5277	10.087	13.7186	0.000494189	1.04083e-07	4267.32
466	11.8879																	492	11.9033	11.278	12.5286	10.0874	13.7192	0.000486937	1.00614e-07	4279.22
467	11.8886																	493	11.9038	11.2781	12.5295	10.0877	13.7199	0.000479791	1.07553e-07	4291.13
468	11.8893																	494	11.9043	11.2781	12.5304	10.0881	13.7205	0.00047275	1.03216e-07	4303.03
469	11.89																	495	11.9047	11.2782	12.5313	10.0884	13.7211	0.000465812	1.00614e-07	4314.94
470	11.8907																	496	11.9052	11.2782	12.5322	10.0887	13.7217	0.000458975	9.71445e-08	4326.84
471	11.8913																	497	11.9057	11.2783	12.533	10.089	13.7223	0.000452238	9.97466e-08	4338.75
472	11.892																	498	11.9061	11.2783	12.5339	10.0893	13.7229	0.0004456	1.03216e-07	4350.65
473	11.8926																	499	11.9065	11.2784	12.5347	10.0896	13.7235	0.00043906	9.28077e-08	4362.56
474	11.8933																	500	11.907	11.2784	12.5355	10.0899	13.724	0.000432615	9.28077e-08	4374.47
475	11.8939	11.855
476	11.8945
477	11.8951
478	11.8957
479	11.8963
480	11.8969
481	11.8975
482	11.8981
483	11.8986
484	11.8992
485	11.8997
486	11.9003
487	11.9008
488	11.9013
489	11.9018
490	11.9023
491	11.9028
492	11.9033
493	11.9038
494	11.9043
495	11.9047
496	11.9052
497	11.9057
498	11.9061
499	11.9065
500	11.907	12.7811

## Sheet: Gompertz 2
T2
Gompertz M(a,b,c)	Parameters	Std Error	T Value	95% Conf Lim	95% Conf Lim	X Observed	Y Observed	Y Predicted	Y Residual	Y Residual%	95% Conf Lim	95% Conf Lim	95% Pred Lim	95% Pred Lim	First Deriv	Second Deriv	Area	X Generated	Y Predicted	95% Conf Lim	95% Conf Lim	95% Pred Lim	95% Pred Lim	First Deriv	Second Deriv	Area
8001	9.3955	0.337125	27.8694	8.68722	10.1038	0	0	0.000116688	-0.000116688	0	-0.00138558	0.00161896	-1.97977	1.98	2.5847e-05	9.41319e-07	0	0	0.000116688	-0.00138558	0.00161896	-1.97977	1.98	2.5847e-05	9.41319e-07	0
0.944334	0.0677831	0.0128858	5.26029	0.040711	0.0948552	24.9306	0	0.00920463	-0.00920463	0	-0.0506991	0.0691083	-1.97159	1.98999	0.0012505	1.3567e-05	0.0595112	1	0.000145307	-0.00167602	0.00196663	-1.97974	1.98003	3.15613e-05	1.09786e-06	0.000130521
0.93451	72.6444	13.8531	5.24392	43.5402	101.749	49.9306	0	0.134892	-0.134892	0	-0.291462	0.561245	-1.89038	2.16016	0.0112244	2.709e-05	1.34952	2	0.000180177	-0.00201849	0.00237884	-1.97971	1.98007	3.83753e-05	1.27478e-06	0.000292695
0.942388						74.9306	1.11111	0.698455	0.412656	37.1391	-0.322506	1.71942	-1.52917	2.92608	0.0355971	-5.74162e-07	10.4811	3	0.000222483	-0.0024205	0.00286547	-1.97966	1.98011	4.64658e-05	1.47378e-06	0.000493351
152.677						99.9306	2.96333	1.91228	1.05106	35.4687	0.677212	3.14734	-0.421245	4.2458	0.0596936	-2.84964e-05	41.8446	4	0.0002736	-0.00289037	0.00343757	-1.97961	1.98016	5.60321e-05	1.69657e-06	0.000740595
						124.931	2.96333	3.54374	-0.580409	-19.5864	2.47619	4.6113	1.29438	5.7931	0.0677546	-2.5385e-05	109.627	5	0.000335113	-0.00343717	0.00410739	-1.97955	1.98022	6.72971e-05	1.94485e-06	0.00104401
						149.931	2.96333	5.17077	-2.20744	-74.4918	4.18556	6.15598	2.95931	7.38224	0.0605526	-1.01263e-05	218.942	6	0.000408843	-0.00407081	0.0048885	-1.97948	1.9803	8.05092e-05	2.22027e-06	0.00141489
						174.931	7.965	6.5172	1.4478	18.177	5.52474	7.50967	4.3025	8.73191	0.0467453	6.573e-07	365.767	7	0.000496872	-0.00480205	0.00579579	-1.97939	1.98039	9.5944e-05	2.52442e-06	0.00186646
						199.931	7.965	7.50966	0.455339	5.71675	6.58883	8.43049	5.32612	9.69321	0.0329911	4.79721e-06	541.821	8	0.000601573	-0.00564245	0.00684559	-1.97929	1.9805	0.000113906	2.8588e-06	0.00241419
						224.931	8.89111	8.19077	0.700342	7.87688	7.40837	8.97316	6.0619	10.3196	0.0220395	5.14907e-06	738.647	9	0.000725637	-0.00660441	0.00805568	-1.97917	1.98062	0.000134729	3.2248e-06	0.00307606
						249.931	8.89111	8.6381	0.25301	2.84565	7.98904	9.28716	6.55454	10.7217	0.0142362	4.13036e-06	949.414	10	0.000872106	-0.00770116	0.00944537	-1.97903	1.98077	0.000158779	3.62363e-06	0.00387293
						274.931	8.89111	8.92407	-0.0329573	-0.370677	8.35347	9.49466	6.8636	10.9845	0.00900824	2.93638e-06	1169.21	11	0.0010444	-0.00894668	0.0110355	-1.97886	1.98095	0.000186457	4.05636e-06	0.00482887
						299.931	8.89111	9.10388	-0.212765	-2.39301	8.55084	9.65692	7.0482	11.1595	0.00562864	1.96366e-06	1394.74	12	0.00124637	-0.0103557	0.0128485	-1.97867	1.98116	0.000218193	4.52383e-06	0.00597162
						324.931	8.89111	9.21579	-0.324681	-3.65174	8.64394	9.78764	7.15498	11.2766	0.00348988	1.26601e-06	1623.84	13	0.0014823	-0.0119437	0.0149083	-1.97845	1.98141	0.000254456	5.02663e-06	0.00733293
						349.931	8.89111	9.28502	-0.393906	-4.43034	8.68287	9.88716	7.21559	11.3544	0.00215358	7.98305e-07	1855.17	14	0.00175696	-0.0137266	0.0172405	-1.97819	1.9817	0.000295749	5.56517e-06	0.00894912
						374.931	8.89111	9.32767	-0.436563	-4.9101	8.69666	9.95868	7.24967	11.4057	0.00132511	4.98073e-07	2087.88	15	0.00207565	-0.0157211	0.0198724	-1.97789	1.98204	0.00034261	6.13948e-06	0.0108615
						399.931	8.89111	9.3539	-0.462786	-5.20504	8.69971	10.0081	7.26874	11.4391	0.000813898	3.13248e-07	2321.42	16	0.00244423	-0.017944	0.0228324	-1.97754	1.98243	0.000395613	6.74933e-06	0.013117
						424.931	8.89111	9.37	-0.478884	-5.3861	8.69865	10.0413	7.27939	11.4606	0.000499364	1.88296e-07	2555.49	17	0.00286913	-0.0204126	0.0261509	-1.97715	1.98289	0.000455369	7.39421e-06	0.0157687
						449.931	8.89111	9.37987	-0.488758	-5.49715	8.69639	10.0633	7.28533	11.4744	0.000306178	1.17143e-07	2789.87	18	0.00335743	-0.0231445	0.0298593	-1.9767	1.98342	0.000522521	8.07317e-06	0.0188764
						474.931	8.89111	9.38592	-0.49481	-5.56523	8.6941	10.0777	7.28865	11.4832	0.000187653	7.11533e-08	3024.45	19	0.00391686	-0.0261569	0.0339907	-1.9762	1.98403	0.00059775	8.78495e-06	0.0225073
						499.931	11.67	9.38963	2.28037	19.5404	8.69218	10.0871	7.29049	11.4888	0.000114981	4.68571e-08	3259.15	20	0.00455586	-0.0294674	0.0385791	-1.97562	1.98473	0.000681766	9.52791e-06	0.0267367
																		21	0.00528357	-0.0330927	0.0436599	-1.97497	1.98554	0.000775313	1.03e-05	0.0316486
																		22	0.00610992	-0.0370495	0.0492694	-1.97424	1.98646	0.000879161	1.1099e-05	0.0373367
																		23	0.00704559	-0.0413535	0.0554447	-1.97343	1.98752	0.000994111	1.1922e-05	0.0439049
																		24	0.00810211	-0.0460197	0.0622239	-1.97252	1.98873	0.00112098	1.27659e-05	0.0514681
X Generated	Y Predicted	Y Observed																25	0.00929182	-0.0510616	0.0696453	-1.97151	1.9901	0.00126063	1.36273e-05	0.0601535
0	0.000116688	0																26	0.0106279	-0.0564918	0.0777476	-1.97039	1.99165	0.00141389	1.45024e-05	0.0701006
1	0.000145307																	27	0.0121244	-0.0623211	0.08657	-1.96916	1.99341	0.00158167	1.53871e-05	0.0814628
2	0.000180177																	28	0.0137964	-0.0685585	0.0961512	-1.9678	1.99539	0.00176483	1.62768e-05	0.0944079
3	0.000222483																	29	0.0156595	-0.075211	0.10653	-1.96631	1.99763	0.00196426	1.7167e-05	0.109119
4	0.0002736																	30	0.0177306	-0.0822834	0.117745	-1.96468	2.00014	0.00218087	1.80529e-05	0.125796
5	0.000335113																	31	0.0200273	-0.0897781	0.129833	-1.9629	2.00295	0.00241552	1.89293e-05	0.144656
6	0.000408843																	32	0.022568	-0.0976946	0.142831	-1.96097	2.0061	0.00266911	1.9791e-05	0.165932
7	0.000496872																	33	0.0253721	-0.10603	0.156774	-1.95887	2.00961	0.00294248	2.06325e-05	0.189879
8	0.000601573																	34	0.0284598	-0.114778	0.171697	-1.9566	2.01352	0.00323648	2.14488e-05	0.216771
9	0.000725637																	35	0.0318522	-0.123928	0.187633	-1.95415	2.01786	0.00355193	2.22341e-05	0.246901
10	0.000872106																	36	0.0355711	-0.133469	0.204612	-1.95152	2.02266	0.00388961	2.29832e-05	0.280584
11	0.0010444																	37	0.0396391	-0.143385	0.222663	-1.94869	2.02796	0.00425027	2.36907e-05	0.318159
12	0.00124637																	38	0.0440795	-0.153654	0.241813	-1.94565	2.03381	0.00463462	2.43514e-05	0.359986
13	0.0014823																	39	0.0489164	-0.164254	0.262087	-1.94241	2.04024	0.00504331	2.49604e-05	0.40645
14	0.00175696																	40	0.0541745	-0.175158	0.283507	-1.93895	2.0473	0.00547696	2.55127e-05	0.45796
15	0.00207565																	41	0.0598789	-0.186335	0.306093	-1.93526	2.05501	0.00593612	2.60036e-05	0.514948
16	0.00244423																	42	0.0660554	-0.197749	0.32986	-1.93133	2.06344	0.00642128	2.64289e-05	0.577875
17	0.00286913																	43	0.0727302	-0.209363	0.354824	-1.92715	2.07261	0.00693286	2.67848e-05	0.647225
18	0.00335743																	44	0.07993	-0.221135	0.380995	-1.92271	2.08257	0.00747121	2.70673e-05	0.72351
19	0.00391686																	45	0.0876817	-0.233017	0.408381	-1.91801	2.09337	0.00803663	2.72735e-05	0.807269
20	0.00455586																	46	0.0960124	-0.244962	0.436987	-1.91302	2.10504	0.00862932	2.74003e-05	0.899066
21	0.00528357																	47	0.104949	-0.256917	0.466816	-1.90773	2.11763	0.0092494	2.74454e-05	0.999496
22	0.00610992																	48	0.11452	-0.268825	0.497866	-1.90213	2.13117	0.00989692	2.74066e-05	1.10918
23	0.00704559																	49	0.124752	-0.280628	0.530132	-1.89621	2.14571	0.0105718	2.72827e-05	1.22876
24	0.00810211																	50	0.135673	-0.292263	0.563609	-1.88993	2.16128	0.011274	2.70725e-05	1.35891
25	0.00929182	0																51	0.147309	-0.303666	0.598285	-1.88329	2.17791	0.0120033	2.67755e-05	1.50034
26	0.0106279																	52	0.159689	-0.31477	0.634148	-1.87625	2.19563	0.0127593	2.63913e-05	1.65378
27	0.0121244																	53	0.172837	-0.325507	0.67118	-1.8688	2.21448	0.0135417	2.59208e-05	1.81998
28	0.0137964																	54	0.186781	-0.335804	0.709365	-1.86091	2.23447	0.01435	2.53644e-05	1.99972
29	0.0156595																	55	0.201545	-0.345589	0.74868	-1.85255	2.25564	0.0151837	2.47239e-05	2.19381
30	0.0177306																	56	0.217156	-0.354789	0.789102	-1.84368	2.278	0.0160421	2.40007e-05	2.40309
31	0.0200273																	57	0.233638	-0.363328	0.830604	-1.83429	2.30156	0.0169245	2.3197e-05	2.62841
32	0.022568																	58	0.251013	-0.371132	0.873158	-1.82432	2.32635	0.0178301	2.23151e-05	2.87066
33	0.0253721																	59	0.269305	-0.378123	0.916734	-1.81375	2.35236	0.018758	2.13585e-05	3.13074
34	0.0284598																	60	0.288536	-0.384227	0.961299	-1.80253	2.3796	0.0197072	2.03303e-05	3.40959
35	0.0318522																	61	0.308727	-0.389368	1.00682	-1.79062	2.40808	0.0206768	1.92341e-05	3.70814
36	0.0355711																	62	0.329896	-0.39347	1.05326	-1.77799	2.43779	0.0216656	1.80733e-05	4.02737
37	0.0396391																	63	0.352064	-0.396461	1.10059	-1.76459	2.46872	0.0226725	1.68535e-05	4.36826
38	0.0440795																	64	0.375247	-0.398267	1.14876	-1.75037	2.50087	0.0236962	1.55782e-05	4.73183
39	0.0489164																	65	0.399461	-0.398817	1.19774	-1.7353	2.53422	0.0247355	1.42519e-05	5.1191
40	0.0541745																	66	0.424722	-0.398043	1.24749	-1.71931	2.56876	0.025789	1.28806e-05	5.5311
41	0.0598789																	67	0.451044	-0.395878	1.29796	-1.70238	2.60446	0.0268554	1.14683e-05	5.9689
42	0.0660554																	68	0.478437	-0.392257	1.34913	-1.68444	2.64132	0.0279333	1.00198e-05	6.43355
43	0.0727302																	69	0.506914	-0.387118	1.40094	-1.66547	2.67929	0.0290212	8.54078e-06	6.92613
44	0.07993																	70	0.536482	-0.380403	1.45337	-1.6454	2.71837	0.0301176	7.03642e-06	7.44774
45	0.0876817																	71	0.567151	-0.372058	1.50636	-1.62421	2.75851	0.0312211	5.51292e-06	7.99946
46	0.0960124																	72	0.598926	-0.362029	1.55988	-1.60184	2.79969	0.0323301	3.97325e-06	8.58241
47	0.104949																	73	0.631813	-0.350268	1.61389	-1.57826	2.84189	0.033443	2.42464e-06	9.19769
48	0.11452																	74	0.665813	-0.336732	1.66836	-1.55343	2.88506	0.0345584	8.70869e-07	9.84641
49	0.124752																	75	0.70093	-0.32138	1.72324	-1.52731	2.92917	0.0356747	-6.82139e-07	10.5297
50	0.135673	0																76	0.737162	-0.304175	1.7785	-1.49987	2.9742	0.0367902	-2.23005e-06	11.2486
51	0.147309																	77	0.774509	-0.285086	1.8341	-1.47108	3.0201	0.0379036	-3.767e-06	12.0044
52	0.159689																	78	0.812968	-0.264084	1.89002	-1.44091	3.06685	0.0390131	-5.2897e-06	12.798
53	0.172837																	79	0.852534	-0.241147	1.94622	-1.40934	3.11441	0.0401174	-6.79384e-06	13.6307
54	0.186781																	80	0.893201	-0.216256	2.00266	-1.37634	3.16275	0.0412149	-8.27385e-06	14.5035
55	0.201545																	81	0.934961	-0.189397	2.05932	-1.34191	3.21183	0.0423041	-9.72691e-06	15.4175
56	0.217156																	82	0.977806	-0.16056	2.11617	-1.30601	3.26162	0.0433836	-1.11482e-05	16.3737
57	0.233638																	83	1.02172	-0.12974	2.17319	-1.26865	3.3121	0.044452	-1.25362e-05	17.3734
58	0.251013																	84	1.06671	-0.0969364	2.23035	-1.22981	3.36323	0.0455078	-1.38845e-05	18.4175
59	0.269305																	85	1.11274	-0.0621535	2.28762	-1.1895	3.41497	0.0465497	-1.51923e-05	19.5072
60	0.288536																	86	1.1598	-0.0253996	2.345	-1.14772	3.46732	0.0475765	-1.64555e-05	20.6434
61	0.308727																	87	1.20788	0.0133122	2.40245	-1.10446	3.52023	0.0485868	-1.76724e-05	21.8271
62	0.329896																	88	1.25697	0.0539649	2.45997	-1.05974	3.57368	0.0495794	-1.8841e-05	23.0595
63	0.352064																	89	1.30704	0.0965369	2.51753	-1.01358	3.62765	0.0505532	-1.9959e-05	24.3414
64	0.375247																	90	1.35807	0.141003	2.57513	-0.965978	3.68211	0.0515071	-2.10224e-05	25.6739
65	0.399461																	91	1.41004	0.187333	2.63275	-0.916964	3.73705	0.0524399	-2.2033e-05	27.0578
66	0.424722																	92	1.46294	0.235493	2.69039	-0.866559	3.79244	0.0533507	-2.29866e-05	28.4942
67	0.451044																	93	1.51674	0.285447	2.74803	-0.81479	3.84826	0.0542385	-2.38845e-05	29.984
68	0.478437																	94	1.57141	0.337154	2.80566	-0.761685	3.9045	0.0551024	-2.47236e-05	31.528
69	0.506914																	95	1.62693	0.390569	2.8633	-0.707277	3.96114	0.0559416	-2.55043e-05	33.1271
70	0.536482																	96	1.68328	0.445645	2.92092	-0.651602	4.01817	0.0567553	-2.62268e-05	34.7822
71	0.567151																	97	1.74043	0.502332	2.97854	-0.594697	4.07557	0.0575428	-2.68909e-05	36.4939
72	0.598926																	98	1.79836	0.560576	3.03614	-0.536603	4.13332	0.0583034	-2.74939e-05	38.2633
73	0.631813																	99	1.85703	0.62032	3.09374	-0.477362	4.19143	0.0590365	-2.80424e-05	40.0909
74	0.665813																	100	1.91642	0.681507	3.15134	-0.41702	4.24987	0.0597416	-2.85286e-05	41.9776
75	0.70093	1.11111																101	1.97651	0.744075	3.20894	-0.355624	4.30864	0.0604182	-2.89584e-05	43.924
76	0.737162																	102	2.03725	0.80796	3.26654	-0.293221	4.36772	0.0610658	-2.93308e-05	45.9308
77	0.774509																	103	2.09863	0.873099	3.32416	-0.229861	4.42712	0.061684	-2.96466e-05	47.9987
78	0.812968																	104	2.16061	0.939424	3.38179	-0.165597	4.48681	0.0622727	-2.99087e-05	50.1283
79	0.852534																	105	2.22316	1.00687	3.43946	-0.10048	4.54681	0.0628314	-3.01152e-05	52.3201
80	0.893201																	106	2.28626	1.07536	3.49716	-0.0345629	4.60709	0.06336	-3.02705e-05	54.5748
81	0.934961																	107	2.34987	1.14483	3.55492	0.0320998	4.66765	0.0638584	-3.03725e-05	56.8928
82	0.977806																	108	2.41397	1.2152	3.61273	0.0994541	4.72848	0.0643264	-3.04267e-05	59.2747
83	1.02172																	109	2.47852	1.28642	3.67062	0.167446	4.78959	0.0647639	-3.04302e-05	61.7209
84	1.06671																	110	2.54349	1.35839	3.72858	0.23602	4.85095	0.0651711	-3.03872e-05	64.2319
85	1.11274																	111	2.60885	1.43105	3.78665	0.305123	4.91257	0.0655478	-3.02992e-05	66.808
86	1.1598																	112	2.67457	1.50433	3.84482	0.374699	4.97444	0.0658943	-3.01673e-05	69.4497
87	1.20788																	113	2.74063	1.57815	3.9031	0.444697	5.03656	0.0662106	-2.99955e-05	72.1573
88	1.25697																	114	2.80698	1.65245	3.96152	0.515063	5.0989	0.0664969	-2.9782e-05	74.931
89	1.30704																	115	2.87361	1.72714	4.02008	0.585744	5.16148	0.0667534	-2.95319e-05	77.7713
90	1.35807																	116	2.94048	1.80217	4.07879	0.65669	5.22427	0.0669804	-2.92442e-05	80.6783
91	1.41004																	117	3.00756	1.87746	4.13767	0.727851	5.28727	0.0671781	-2.8924e-05	83.6523
92	1.46294																	118	3.07483	1.95294	4.19671	0.799178	5.35047	0.067347	-2.85698e-05	86.6935
93	1.51674																	119	3.14225	2.02855	4.25594	0.870624	5.41387	0.0674872	-2.81865e-05	89.802
94	1.57141																	120	3.20979	2.10422	4.31536	0.942142	5.47744	0.0675993	-2.77741e-05	92.9781
95	1.62693																	121	3.27744	2.17989	4.37498	1.01369	5.54118	0.0676836	-2.73333e-05	96.2217
96	1.68328																	122	3.34515	2.2555	4.4348	1.08522	5.60508	0.0677406	-2.68734e-05	99.5329
97	1.74043																	123	3.41291	2.33099	4.49483	1.1567	5.66912	0.0677707	-2.63849e-05	102.912
98	1.79836																	124	3.48068	2.40631	4.55506	1.22808	5.73329	0.0677744	-2.58764e-05	106.359
99	1.85703																	125	3.54845	2.48139	4.6155	1.29933	5.79757	0.0677523	-2.5346e-05	109.873
100	1.91642	2.96333																126	3.61618	2.5562	4.67615	1.37041	5.86195	0.0677048	-2.48017e-05	113.456
101	1.97651																	127	3.68385	2.63068	4.73701	1.44128	5.92641	0.0676325	-2.42431e-05	117.106
102	2.03725																	128	3.75143	2.7048	4.79807	1.51193	5.99094	0.0675359	-2.3665e-05	120.823
103	2.09863																	129	3.81891	2.77849	4.85933	1.58231	6.05552	0.0674157	-2.30791e-05	124.609
104	2.16061																	130	3.88626	2.85174	4.92078	1.65239	6.12013	0.0672724	-2.24803e-05	128.461
105	2.22316																	131	3.95345	2.9245	4.9824	1.72216	6.18474	0.0671067	-2.18712e-05	132.381
106	2.28626																	132	4.02046	2.99675	5.04418	1.79158	6.24935	0.066919	-2.1254e-05	136.368
107	2.34987																	133	4.08728	3.06845	5.10612	1.86063	6.31393	0.0667102	-2.06301e-05	140.422
108	2.41397																	134	4.15388	3.13957	5.16818	1.9293	6.37846	0.0664806	-2.00006e-05	144.542
109	2.47852																	135	4.22024	3.2101	5.23037	1.99755	6.44292	0.0662311	-1.9365e-05	148.73
110	2.54349																	136	4.28633	3.28002	5.29265	2.06539	6.50728	0.0659623	-1.87294e-05	152.983
111	2.60885																	137	4.35215	3.3493	5.355	2.13277	6.57153	0.0656746	-1.80916e-05	157.302
112	2.67457																	138	4.41768	3.41795	5.41741	2.1997	6.63565	0.0653689	-1.74538e-05	161.687
113	2.74063																	139	4.48289	3.48593	5.47984	2.26616	6.69961	0.0650458	-1.68165e-05	166.137
114	2.80698																	140	4.54776	3.55326	5.54227	2.33214	6.76339	0.0647058	-1.61796e-05	170.653
115	2.87361																	141	4.61229	3.61991	5.60467	2.39762	6.82696	0.0643497	-1.55466e-05	175.233
116	2.94048																	142	4.67646	3.6859	5.66702	2.4626	6.89031	0.063978	-1.49149e-05	179.877
117	3.00756																	143	4.74024	3.75121	5.72928	2.52707	6.95342	0.0635914	-1.42892e-05	184.586
118	3.07483																	144	4.80364	3.81584	5.79143	2.59102	7.01625	0.0631905	-1.36679e-05	189.358
119	3.14225																	145	4.86662	3.87981	5.85343	2.65444	7.0788	0.0627759	-1.30506e-05	194.193
120	3.20979																	146	4.92918	3.94311	5.91526	2.71733	7.14103	0.0623483	-1.24445e-05	199.091
121	3.27744																	147	4.99131	4.00575	5.97688	2.77969	7.20294	0.0619082	-1.18427e-05	204.051
122	3.34515																	148	5.053	4.06773	6.03826	2.8415	7.26449	0.0614563	-1.12479e-05	209.073
123	3.41291																	149	5.11422	4.12906	6.09938	2.90278	7.32566	0.0609931	-1.06643e-05	214.157
124	3.48068																	150	5.17498	4.18976	6.1602	2.96351	7.38645	0.0605193	-1.00864e-05	219.301
125	3.54845	2.96333																151	5.23526	4.24982	6.22069	3.02369	7.44682	0.0600354	-9.52153e-06	224.507
126	3.61618																	152	5.29505	4.30927	6.28082	3.08333	7.50676	0.059542	-8.96575e-06	229.772
127	3.68385																	153	5.35434	4.3681	6.34057	3.14242	7.56626	0.0590396	-8.41735e-06	235.096
128	3.75143																	154	5.41312	4.42634	6.3999	3.20096	7.62529	0.0585288	-7.88196e-06	240.48
129	3.81891																	155	5.47139	4.48398	6.4588	3.25895	7.68384	0.0580101	-7.35439e-06	245.923
130	3.88626																	156	5.52914	4.54105	6.51723	3.31639	7.74189	0.057484	-6.83983e-06	251.423
131	3.95345																	157	5.58636	4.59755	6.57517	3.37329	7.79943	0.0569511	-6.33872e-06	256.981
132	4.02046																	158	5.64304	4.65349	6.63259	3.42964	7.85644	0.0564119	-5.84672e-06	262.595
133	4.08728																	159	5.69918	4.70888	6.68948	3.48544	7.91292	0.0558668	-5.36817e-06	268.267
134	4.15388																	160	5.75477	4.76374	6.74581	3.5407	7.96884	0.0553164	-4.89873e-06	273.994
135	4.22024																	161	5.80981	4.81807	6.80156	3.59543	8.0242	0.054761	-4.44231e-06	279.776
136	4.28633																	162	5.86429	4.87188	6.85671	3.64961	8.07898	0.0542012	-4.00237e-06	285.613
137	4.35215																	163	5.91821	4.92518	6.91124	3.70325	8.13317	0.0536374	-3.56721e-06	291.504
138	4.41768																	164	5.97157	4.97798	6.96515	3.75636	8.18677	0.0530701	-3.1481e-06	297.449
139	4.48289																	165	6.02435	5.0303	7.0184	3.80893	8.23977	0.0524996	-2.73984e-06	303.447
140	4.54776																	166	6.07656	5.08213	7.071	3.86097	8.29215	0.0519263	-2.34676e-06	309.498
141	4.61229																	167	6.1282	5.13349	7.12292	3.91249	8.34392	0.0513507	-1.96149e-06	315.6
142	4.67646																	168	6.17926	5.18437	7.17416	3.96347	8.39506	0.0507732	-1.5901e-06	321.754
143	4.74024																	169	6.22975	5.2348	7.22469	4.01393	8.44557	0.050194	-1.23347e-06	327.958
144	4.80364																	170	6.27965	5.28478	7.27453	4.06386	8.49544	0.0496136	-8.86379e-07	334.213
145	4.86662																	171	6.32898	5.33431	7.32365	4.11328	8.54467	0.0490324	-5.51004e-07	340.518
146	4.92918																	172	6.37772	5.38339	7.37204	4.16218	8.59326	0.0484506	-2.25174e-07	346.871
147	4.99131																	173	6.42588	5.43204	7.41971	4.21055	8.6412	0.0478685	8.59046e-08	353.273
148	5.053																	174	6.47345	5.48026	7.46665	4.25842	8.68849	0.0472865	3.86137e-07	359.723
149	5.11422																	175	6.52045	5.52805	7.51285	4.30577	8.73513	0.046705	6.72486e-07	366.22
150	5.17498	2.96333																176	6.56686	5.57541	7.55832	4.35261	8.78112	0.0461241	9.51025e-07	372.763
151	5.23526																	177	6.6127	5.62236	7.60304	4.39894	8.82645	0.0455441	1.22132e-06	379.353
152	5.29505																	178	6.65795	5.66889	7.64702	4.44477	8.87114	0.0449654	1.47556e-06	385.988
153	5.35434																	179	6.70263	5.71501	7.69025	4.49009	8.91517	0.0443881	1.72113e-06	392.669
154	5.41312																	180	6.74673	5.76072	7.73274	4.53491	8.95855	0.0438126	1.95715e-06	399.394
155	5.47139																	181	6.79026	5.80602	7.77449	4.57922	9.00129	0.043239	2.18059e-06	406.162
156	5.52914																	182	6.83321	5.85092	7.8155	4.62304	9.04338	0.0426676	2.39752e-06	412.974
157	5.58636																	183	6.87559	5.89541	7.85577	4.66636	9.08482	0.0420986	2.60143e-06	419.828
158	5.64304																	184	6.91741	5.9395	7.89531	4.70919	9.12563	0.0415322	2.79754e-06	426.725
159	5.69918																	185	6.95866	5.9832	7.93411	4.75152	9.16579	0.0409686	2.98193e-06	433.663
160	5.75477																	186	6.99934	6.0265	7.97219	4.79336	9.20533	0.040408	3.15981e-06	440.642
161	5.80981																	187	7.03947	6.0694	8.00955	4.83471	9.24424	0.0398505	3.32772e-06	447.661
162	5.86429																	188	7.07905	6.11191	8.04619	4.87557	9.28252	0.0392964	3.48781e-06	454.721
163	5.91821																	189	7.11807	6.15402	8.08211	4.91595	9.32019	0.0387457	3.63923e-06	461.819
164	5.97157																	190	7.15654	6.19574	8.11734	4.95584	9.35724	0.0381987	3.7811e-06	468.957
165	6.02435																	191	7.19447	6.23707	8.15186	4.99525	9.39368	0.0376555	3.91473e-06	476.132
166	6.07656																	192	7.23185	6.27801	8.1857	5.03418	9.42952	0.0371162	4.04316e-06	483.345
167	6.1282																	193	7.2687	6.31855	8.21885	5.07263	9.46477	0.0365809	4.16551e-06	490.596
168	6.17926																	194	7.30501	6.35871	8.25132	5.1106	9.49943	0.0360498	4.2744e-06	497.883
169	6.22975																	195	7.3408	6.39847	8.28313	5.1481	9.5335	0.035523	4.37853e-06	505.206
170	6.27965																	196	7.37606	6.43784	8.31428	5.18513	9.567	0.0350005	4.47441e-06	512.564
171	6.32898																	197	7.4108	6.47683	8.34478	5.22168	9.59992	0.0344825	4.5677e-06	519.958
172	6.37772																	198	7.44503	6.51542	8.37463	5.25777	9.63229	0.0339691	4.65186e-06	527.386
173	6.42588																	199	7.47874	6.55363	8.40386	5.29339	9.6641	0.0334603	4.72779e-06	534.847
174	6.47345																	200	7.51195	6.59144	8.43246	5.32854	9.69536	0.0329563	4.80155e-06	542.343
175	6.52045	7.965																201	7.54466	6.62887	8.46045	5.36323	9.72608	0.0324571	4.86706e-06	549.871
176	6.56686																	202	7.57687	6.66591	8.48783	5.39746	9.75627	0.0319627	4.92693e-06	557.432
177	6.6127																	203	7.60858	6.70255	8.51462	5.43124	9.78593	0.0314732	4.97856e-06	565.025
178	6.65795																	204	7.63981	6.73881	8.54082	5.46456	9.81507	0.0309888	5.03019e-06	572.649
179	6.70263																	205	7.67056	6.77468	8.56645	5.49742	9.84371	0.0305093	5.07488e-06	580.304
180	6.74673																	206	7.70084	6.81015	8.59152	5.52983	9.87184	0.030035	5.11132e-06	587.99
181	6.79026																	207	7.73064	6.84524	8.61603	5.5618	9.89947	0.0295657	5.14907e-06	595.706
182	6.83321																	208	7.75997	6.87994	8.64	5.59331	9.92662	0.0291016	5.17987e-06	603.451
183	6.87559																	209	7.78884	6.91425	8.66343	5.62439	9.95329	0.0286427	5.202e-06	611.226
184	6.91741																	210	7.81726	6.94817	8.68634	5.65502	9.97949	0.028189	5.22586e-06	619.029
185	6.95866																	211	7.84522	6.9817	8.70874	5.68522	10.0052	0.0277405	5.24235e-06	626.86
186	6.99934																	212	7.87274	7.01484	8.73064	5.71498	10.0305	0.0272973	5.2558e-06	634.719
187	7.03947																	213	7.89982	7.04759	8.75204	5.74431	10.0553	0.0268593	5.26578e-06	642.605
188	7.07905																	214	7.92646	7.07995	8.77296	5.7732	10.0797	0.0264266	5.27272e-06	650.518
189	7.11807																	215	7.95267	7.11193	8.79342	5.80167	10.1037	0.0259991	5.27489e-06	658.458
190	7.15654																	216	7.97846	7.14351	8.81341	5.82972	10.1272	0.0255769	5.27142e-06	666.424
191	7.19447																	217	8.00383	7.1747	8.83295	5.85734	10.1503	0.02516	5.27055e-06	674.415
192	7.23185																	218	8.02878	7.20551	8.85205	5.88455	10.173	0.0247484	5.26621e-06	682.431
193	7.2687																	219	8.05333	7.23593	8.87072	5.91135	10.1953	0.024342	5.25406e-06	690.472
194	7.30501																	220	8.07747	7.26596	8.88897	5.93773	10.2172	0.0239409	5.24018e-06	698.538
195	7.3408																	221	8.10121	7.2956	8.90681	5.9637	10.2387	0.023545	5.22803e-06	706.627
196	7.37606																	222	8.12456	7.32486	8.92426	5.98927	10.2598	0.0231544	5.20634e-06	714.74
197	7.4108																	223	8.14752	7.35373	8.94131	6.01444	10.2806	0.022769	5.18812e-06	722.876
198	7.44503																	224	8.1701	7.38221	8.95798	6.03921	10.301	0.0223887	5.17076e-06	731.035
199	7.47874																	225	8.1923	7.41031	8.97428	6.06358	10.321	0.0220136	5.143e-06	739.216
200	7.51195	7.965																226	8.21413	7.43803	8.99023	6.08756	10.3407	0.0216437	5.12043e-06	747.419
201	7.54466																	227	8.23559	7.46536	9.00582	6.11116	10.36	0.0212789	5.08833e-06	755.644
202	7.57687																	228	8.25669	7.4923	9.02107	6.13437	10.379	0.0209191	5.05969e-06	763.89
203	7.60858																	229	8.27743	7.51887	9.03599	6.1572	10.3977	0.0205644	5.02932e-06	772.157
204	7.63981																	230	8.29782	7.54505	9.05059	6.17966	10.416	0.0202148	4.99635e-06	780.445
205	7.67056																	231	8.31786	7.57085	9.06487	6.20174	10.434	0.0198702	4.95991e-06	788.753
206	7.70084																	232	8.33756	7.59627	9.07885	6.22345	10.4517	0.0195305	4.92433e-06	797.081
207	7.73064																	233	8.35692	7.62131	9.09253	6.2448	10.469	0.0191957	4.88615e-06	805.428
208	7.75997																	234	8.37595	7.64598	9.10593	6.26578	10.4861	0.0188658	4.84797e-06	813.794
209	7.78884																	235	8.39465	7.67026	9.11904	6.28641	10.5029	0.0185408	4.81153e-06	822.18
210	7.81726																	236	8.41304	7.69418	9.13189	6.30669	10.5194	0.0182206	4.77161e-06	830.584
211	7.84522																	237	8.4311	7.71772	9.14448	6.32661	10.5356	0.0179051	4.72909e-06	839.006
212	7.87274																	238	8.44885	7.74088	9.15681	6.34619	10.5515	0.0175944	4.68657e-06	847.446
213	7.89982																	239	8.46629	7.76367	9.1689	6.36543	10.5671	0.0172884	4.64058e-06	855.903
214	7.92646																	240	8.48343	7.7861	9.18075	6.38433	10.5825	0.016987	4.5998e-06	864.378
215	7.95267																	241	8.50026	7.80815	9.19238	6.40289	10.5976	0.0166902	4.55555e-06	872.87
216	7.97846																	242	8.51681	7.82984	9.20378	6.42113	10.6125	0.016398	4.50956e-06	881.379
217	8.00383																	243	8.53306	7.85116	9.21496	6.43904	10.6271	0.0161103	4.46097e-06	889.904
218	8.02878																	244	8.54903	7.87212	9.22594	6.45663	10.6414	0.015827	4.41584e-06	898.445
219	8.05333																	245	8.56472	7.89272	9.23672	6.4739	10.6555	0.0155481	4.36985e-06	907.002
220	8.07747																	246	8.58013	7.91295	9.2473	6.49085	10.6694	0.0152737	4.32039e-06	915.574
221	8.10121																	247	8.59527	7.93283	9.2577	6.5075	10.683	0.0150035	4.27527e-06	924.162
222	8.12456																	248	8.61014	7.95235	9.26792	6.52384	10.6964	0.0147376	4.22928e-06	932.764
223	8.14752																	249	8.62474	7.97152	9.27796	6.53988	10.7096	0.014476	4.17722e-06	941.382
224	8.1701																	250	8.63909	7.99034	9.28784	6.55562	10.7226	0.0142185	4.12863e-06	950.014
225	8.1923	8.89111																251	8.65318	8.0088	9.29756	6.57107	10.7353	0.0139651	4.0809e-06	958.66
226	8.21413																	252	8.66702	8.02692	9.30712	6.58623	10.7478	0.0137159	4.03144e-06	967.32
227	8.23559																	253	8.68061	8.04469	9.31653	6.60111	10.7601	0.0134706	3.98285e-06	975.994
228	8.25669																	254	8.69396	8.06212	9.3258	6.6157	10.7722	0.0132294	3.93426e-06	984.681
229	8.27743																	255	8.70707	8.07922	9.33493	6.63002	10.7841	0.0129921	3.88393e-06	993.382
230	8.29782																	256	8.71995	8.09597	9.34393	6.64407	10.7958	0.0127586	3.8336e-06	1002.1
231	8.31786																	257	8.73259	8.11239	9.3528	6.65784	10.8073	0.012529	3.78241e-06	1010.82
232	8.33756																	258	8.74501	8.12847	9.36154	6.67135	10.8187	0.0123032	3.73902e-06	1019.56
233	8.35692																	259	8.7572	8.14423	9.37017	6.6846	10.8298	0.0120811	3.68696e-06	1028.31
234	8.37595																	260	8.76917	8.15966	9.37868	6.69759	10.8408	0.0118627	3.63836e-06	1037.07
235	8.39465																	261	8.78093	8.17477	9.38708	6.71033	10.8515	0.011648	3.59151e-06	1045.85
236	8.41304																	262	8.79247	8.18956	9.39538	6.72282	10.8621	0.0114368	3.54378e-06	1054.64
237	8.4311																	263	8.8038	8.20403	9.40357	6.73507	10.8725	0.0112292	3.49606e-06	1063.43
238	8.44885																	264	8.81493	8.21819	9.41167	6.74707	10.8828	0.011025	3.44313e-06	1072.24
239	8.46629																	265	8.82585	8.23204	9.41967	6.75884	10.8929	0.0108244	3.3954e-06	1081.06
240	8.48343																	266	8.83658	8.24558	9.42758	6.77037	10.9028	0.0106271	3.34854e-06	1089.9
241	8.50026																	267	8.84711	8.25881	9.4354	6.78167	10.9125	0.0104331	3.30429e-06	1098.74
242	8.51681																	268	8.85745	8.27175	9.44314	6.79275	10.9221	0.0102425	3.2557e-06	1107.59
243	8.53306																	269	8.86759	8.28439	9.4508	6.8036	10.9316	0.0100551	3.21058e-06	1116.45
244	8.54903																	270	8.87756	8.29674	9.45837	6.81424	10.9409	0.00987096	3.16025e-06	1125.32
245	8.56472																	271	8.88734	8.3088	9.46587	6.82466	10.95	0.00968995	3.11599e-06	1134.21
246	8.58013																	272	8.89694	8.32057	9.4733	6.83487	10.959	0.00951205	3.07087e-06	1143.1
247	8.59527																	273	8.90636	8.33207	9.48066	6.84487	10.9679	0.00933723	3.02488e-06	1152
248	8.61014																	274	8.91561	8.34328	9.48794	6.85467	10.9766	0.00916543	2.97889e-06	1160.91
249	8.62474																	275	8.92469	8.35422	9.49516	6.86426	10.9851	0.00899661	2.9329e-06	1169.83
250	8.63909	8.89111																276	8.93361	8.3649	9.50232	6.87366	10.9936	0.00883073	2.89386e-06	1178.76
251	8.65318																	277	8.94236	8.37531	9.50941	6.88287	11.0018	0.00866774	2.84787e-06	1187.7
252	8.66702																	278	8.95094	8.38545	9.51643	6.89189	11.01	0.00850759	2.80188e-06	1196.65
253	8.68061																	279	8.95937	8.39534	9.5234	6.90071	11.018	0.00835025	2.7637e-06	1205.6
254	8.69396																	280	8.96764	8.40498	9.53031	6.90936	11.0259	0.00819566	2.71511e-06	1214.56
255	8.70707																	281	8.97576	8.41437	9.53716	6.91783	11.0337	0.0080438	2.67693e-06	1223.54
256	8.71995																	282	8.98373	8.42351	9.54395	6.92612	11.0414	0.00789461	2.63441e-06	1232.52
257	8.73259																	283	8.99155	8.43242	9.55069	6.93423	11.0489	0.00774805	2.59102e-06	1241.5
258	8.74501																	284	8.99923	8.44109	9.55737	6.94218	11.0563	0.00760409	2.55371e-06	1250.5
259	8.7572																	285	9.00676	8.44952	9.564	6.94996	11.0636	0.00746268	2.51032e-06	1259.5
260	8.76917																	286	9.01416	8.45773	9.57058	6.95757	11.0707	0.00732377	2.47214e-06	1268.51
261	8.78093																	287	9.02141	8.46572	9.5771	6.96502	11.0778	0.00718734	2.42963e-06	1277.53
262	8.79247																	288	9.02853	8.47349	9.58357	6.97232	11.0847	0.00705334	2.39145e-06	1286.56
263	8.8038																	289	9.03552	8.48104	9.59	6.97946	11.0916	0.00692173	2.35153e-06	1295.59
264	8.81493																	290	9.04238	8.48839	9.59636	6.98645	11.0983	0.00679248	2.31335e-06	1304.63
265	8.82585																	291	9.04911	8.49553	9.60268	6.99329	11.1049	0.00666554	2.27864e-06	1313.67
266	8.83658																	292	9.05571	8.50246	9.60895	6.99998	11.1114	0.00654088	2.24046e-06	1322.72
267	8.84711																	293	9.06219	8.5092	9.61517	7.00653	11.1178	0.00641846	2.20575e-06	1331.78
268	8.85745																	294	9.06855	8.51575	9.62134	7.01294	11.1242	0.00629824	2.16497e-06	1340.85
269	8.86759																	295	9.07478	8.52211	9.62746	7.01921	11.1304	0.00618019	2.13026e-06	1349.92
270	8.87756																	296	9.08091	8.52828	9.63353	7.02534	11.1365	0.00606428	2.09382e-06	1359
271	8.88734																	297	9.08691	8.53428	9.63955	7.03135	11.1425	0.00595046	2.05824e-06	1368.08
272	8.89694																	298	9.09281	8.54009	9.64553	7.03722	11.1484	0.0058387	2.02527e-06	1377.17
273	8.90636																	299	9.09859	8.54574	9.65145	7.04297	11.1542	0.00572896	1.98969e-06	1386.27
274	8.91561																	300	9.10427	8.55121	9.65732	7.04859	11.1599	0.00562122	1.95932e-06	1395.37
275	8.92469	8.89111																301	9.10984	8.55652	9.66315	7.05409	11.1656	0.00551544	1.92895e-06	1404.48
276	8.93361																	302	9.1153	8.56168	9.66892	7.05947	11.1711	0.00541159	1.89424e-06	1413.59
277	8.94236																	303	9.12066	8.56667	9.67465	7.06473	11.1766	0.00530963	1.86213e-06	1422.71
278	8.95094																	304	9.12592	8.57151	9.68032	7.06988	11.182	0.00520953	1.8309e-06	1431.83
279	8.95937																	305	9.13108	8.57621	9.68595	7.07491	11.1872	0.00511126	1.79879e-06	1440.96
280	8.96764																	306	9.13614	8.58075	9.69153	7.07984	11.1924	0.00501479	1.76755e-06	1450.09
281	8.97576																	307	9.14111	8.58516	9.69706	7.08465	11.1976	0.00492009	1.73631e-06	1459.23
282	8.98373																	308	9.14598	8.58943	9.70253	7.08936	11.2026	0.00482712	1.70768e-06	1468.37
283	8.99155																	309	9.15076	8.59356	9.70796	7.09397	11.2076	0.00473586	1.67644e-06	1477.52
284	8.99923																	310	9.15545	8.59757	9.71334	7.09847	11.2124	0.00464628	1.64694e-06	1486.68
285	9.00676																	311	9.16006	8.60144	9.71867	7.10288	11.2172	0.00455835	1.61917e-06	1495.83
286	9.01416																	312	9.16457	8.6052	9.72395	7.10718	11.222	0.00447204	1.59227e-06	1505
287	9.02141																	313	9.169	8.60883	9.72917	7.1114	11.2266	0.00438733	1.56798e-06	1514.16
288	9.02853																	314	9.17335	8.61234	9.73435	7.11552	11.2312	0.00430417	1.53587e-06	1523.33
289	9.03552																	315	9.17761	8.61574	9.73948	7.11954	11.2357	0.00422256	1.51071e-06	1532.51
290	9.04238																	316	9.18179	8.61903	9.74455	7.12348	11.2401	0.00414245	1.48381e-06	1541.69
291	9.04911																	317	9.1859	8.62221	9.74958	7.12733	11.2445	0.00406383	1.45951e-06	1550.87
292	9.05571																	318	9.18992	8.62529	9.75456	7.1311	11.2487	0.00398666	1.43001e-06	1560.06
293	9.06219																	319	9.19387	8.62826	9.75948	7.13478	11.253	0.00391093	1.40571e-06	1569.25
294	9.06855																	320	9.19774	8.63113	9.76435	7.13838	11.2571	0.00383661	1.37881e-06	1578.45
295	9.07478																	321	9.20154	8.63391	9.76918	7.1419	11.2612	0.00376366	1.35799e-06	1587.65
296	9.08091																	322	9.20527	8.63659	9.77395	7.14533	11.2652	0.00369207	1.33282e-06	1596.85
297	9.08691																	323	9.20893	8.63919	9.77867	7.1487	11.2692	0.00362182	1.31113e-06	1606.06
298	9.09281																	324	9.21251	8.64169	9.78334	7.15198	11.273	0.00355288	1.28336e-06	1615.27
299	9.09859																	325	9.21603	8.64411	9.78796	7.1552	11.2769	0.00348522	1.26254e-06	1624.48
300	9.10427	8.89111																326	9.21949	8.64644	9.79253	7.15834	11.2806	0.00341882	1.24258e-06	1633.7
301	9.10984																	327	9.22287	8.64869	9.79705	7.16141	11.2843	0.00335367	1.21828e-06	1642.92
302	9.1153																	328	9.22619	8.65087	9.80152	7.16441	11.288	0.00328973	1.19919e-06	1652.15
303	9.12066																	329	9.22945	8.65297	9.80594	7.16735	11.2916	0.00322699	1.1775e-06	1661.38
304	9.12592																	330	9.23265	8.65499	9.8103	7.17022	11.2951	0.00316543	1.15581e-06	1670.61
305	9.13108																	331	9.23578	8.65694	9.81462	7.17302	11.2985	0.00310501	1.13238e-06	1679.84
306	9.13614																	332	9.23886	8.65883	9.81889	7.17576	11.302	0.00304574	1.11329e-06	1689.08
307	9.14111																	333	9.24187	8.66064	9.82311	7.17844	11.3053	0.00298757	1.09507e-06	1698.32
308	9.14598																	334	9.24483	8.66239	9.82728	7.18106	11.3086	0.0029305	1.07251e-06	1707.56
309	9.15076																	335	9.24774	8.66408	9.8314	7.18361	11.3119	0.00287449	1.05515e-06	1716.81
310	9.15545																	336	9.25058	8.6657	9.83547	7.18611	11.3151	0.00281954	1.03346e-06	1726.06
311	9.16006																	337	9.25338	8.66726	9.83949	7.18856	11.3182	0.00276563	1.01177e-06	1735.31
312	9.16457																	338	9.25611	8.66877	9.84346	7.19095	11.3213	0.00271273	9.97882e-07	1744.56
313	9.169																	339	9.2588	8.67022	9.84738	7.19328	11.3243	0.00266083	9.7966e-07	1753.82
314	9.17335																	340	9.26144	8.67162	9.85126	7.19556	11.3273	0.0026099	9.59702e-07	1763.08
315	9.17761																	341	9.26402	8.67296	9.85508	7.19779	11.3302	0.00255994	9.4148e-07	1772.34
316	9.18179																	342	9.26656	8.67425	9.85886	7.19997	11.3331	0.00251092	9.26728e-07	1781.61
317	9.1859																	343	9.26904	8.6755	9.86259	7.2021	11.336	0.00246282	9.08506e-07	1790.88
318	9.18992																	344	9.27148	8.67669	9.86628	7.20419	11.3388	0.00241563	8.93755e-07	1800.15
319	9.19387																	345	9.27388	8.67784	9.86991	7.20622	11.3415	0.00236934	8.73797e-07	1809.42
320	9.19774																	346	9.27622	8.67894	9.8735	7.20821	11.3442	0.00232392	8.59046e-07	1818.7
321	9.20154																	347	9.27852	8.68	9.87704	7.21015	11.3469	0.00227936	8.46898e-07	1827.97
322	9.20527																	348	9.28078	8.68102	9.88054	7.21205	11.3495	0.00223564	8.30411e-07	1837.25
323	9.20893																	349	9.28299	8.682	9.88399	7.2139	11.3521	0.00219275	8.13057e-07	1846.53
324	9.21251																	350	9.28517	8.68293	9.8874	7.21572	11.3546	0.00215068	7.9657e-07	1855.82
325	9.21603	8.89111																351	9.2873	8.68383	9.89076	7.21749	11.3571	0.0021094	7.86157e-07	1865.1
326	9.21949																	352	9.28939	8.6847	9.89408	7.21922	11.3596	0.00206891	7.662e-07	1874.39
327	9.22287																	353	9.29143	8.68552	9.89735	7.22091	11.362	0.00202918	7.55787e-07	1883.68
328	9.22619																	354	9.29344	8.68631	9.90057	7.22256	11.3643	0.00199021	7.36697e-07	1892.98
329	9.22945																	355	9.29542	8.68707	9.90376	7.22418	11.3667	0.00195198	7.24549e-07	1902.27
330	9.23265																	356	9.29735	8.6878	9.9069	7.22576	11.3689	0.00191447	7.10665e-07	1911.57
331	9.23578																	357	9.29924	8.68849	9.91	7.2273	11.3712	0.00187768	7.00253e-07	1920.87
332	9.23886																	358	9.3011	8.68916	9.91305	7.22881	11.3734	0.00184159	6.87237e-07	1930.17
333	9.24187																	359	9.30293	8.68979	9.91606	7.23028	11.3756	0.00180618	6.72486e-07	1939.47
334	9.24483																	360	9.30472	8.6904	9.91903	7.23172	11.3777	0.00177145	6.63808e-07	1948.77
335	9.24774																	361	9.30647	8.69098	9.92196	7.23312	11.3798	0.00173738	6.49925e-07	1958.08
336	9.25058																	362	9.30819	8.69153	9.92485	7.2345	11.3819	0.00170396	6.35173e-07	1967.38
337	9.25338																	363	9.30988	8.69206	9.9277	7.23584	11.3839	0.00167118	6.26496e-07	1976.69
338	9.25611																	364	9.31153	8.69256	9.93051	7.23715	11.3859	0.00163902	6.1348e-07	1986
339	9.2588																	365	9.31316	8.69304	9.93327	7.23843	11.3879	0.00160747	5.99597e-07	1995.32
340	9.26144																	366	9.31475	8.6935	9.936	7.23968	11.3898	0.00157653	5.86581e-07	2004.63
341	9.26402																	367	9.31631	8.69393	9.93869	7.24091	11.3917	0.00154617	5.78771e-07	2013.95
342	9.26656																	368	9.31784	8.69434	9.94134	7.2421	11.3936	0.0015164	5.68359e-07	2023.26
343	9.26904																	369	9.31934	8.69473	9.94396	7.24327	11.3954	0.00148719	5.55343e-07	2032.58
344	9.27148																	370	9.32082	8.6951	9.94653	7.24441	11.3972	0.00145855	5.49269e-07	2041.9
345	9.27388																	371	9.32226	8.69546	9.94907	7.24553	11.399	0.00143045	5.37121e-07	2051.22
346	9.27622																	372	9.32368	8.69579	9.95157	7.24662	11.4007	0.00140288	5.27576e-07	2060.55
347	9.27852																	373	9.32507	8.6961	9.95403	7.24768	11.4025	0.00137585	5.1456e-07	2069.87
348	9.28078																	374	9.32643	8.6964	9.95646	7.24872	11.4041	0.00134933	5.05015e-07	2079.2
349	9.28299																	375	9.32777	8.69668	9.95885	7.24974	11.4058	0.00132332	4.98941e-07	2088.52
350	9.28517	8.89111																376	9.32908	8.69695	9.96121	7.25073	11.4074	0.0012978	4.86793e-07	2097.85
351	9.2873																	377	9.33036	8.6972	9.96353	7.2517	11.409	0.00127278	4.78983e-07	2107.18
352	9.28939																	378	9.33162	8.69743	9.96581	7.25265	11.4106	0.00124823	4.67703e-07	2116.51
353	9.29143																	379	9.33286	8.69765	9.96807	7.25357	11.4121	0.00122416	4.65967e-07	2125.84
354	9.29344																	380	9.33407	8.69786	9.97029	7.25448	11.4137	0.00120054	4.52952e-07	2135.18
355	9.29542																	381	9.33526	8.69805	9.97247	7.25536	11.4152	0.00117738	4.45142e-07	2144.51
356	9.29735																	382	9.33643	8.69823	9.97462	7.25622	11.4166	0.00115466	4.32994e-07	2153.85
357	9.29924																	383	9.33757	8.69839	9.97674	7.25707	11.4181	0.00113238	4.28655e-07	2163.19
358	9.3011																	384	9.33869	8.69855	9.97883	7.25789	11.4195	0.00111052	4.22581e-07	2172.52
359	9.30293																	385	9.33979	8.69869	9.98089	7.2587	11.4209	0.00108909	4.09565e-07	2181.86
360	9.30472																	386	9.34087	8.69882	9.98291	7.25948	11.4223	0.00106806	4.01756e-07	2191.2
361	9.30647																	387	9.34193	8.69894	9.98491	7.26025	11.4236	0.00104744	3.95682e-07	2200.54
362	9.30819																	388	9.34296	8.69906	9.98687	7.261	11.4249	0.00102722	3.8874e-07	2209.89
363	9.30988																	389	9.34398	8.69916	9.98881	7.26174	11.4262	0.00100738	3.80063e-07	2219.23
364	9.31153																	390	9.34498	8.69925	9.99071	7.26245	11.4275	0.000987926	3.73121e-07	2228.58
365	9.31316																	391	9.34596	8.69933	9.99258	7.26315	11.4288	0.000968844	3.67047e-07	2237.92
366	9.31475																	392	9.34692	8.6994	9.99443	7.26384	11.43	0.000950129	3.5837e-07	2247.27
367	9.31631																	393	9.34786	8.69947	9.99625	7.26451	11.4312	0.000931773	3.52296e-07	2256.61
368	9.31784																	394	9.34878	8.69952	9.99803	7.26516	11.4324	0.00091377	3.47089e-07	2265.96
369	9.31934																	395	9.34968	8.69957	9.9998	7.2658	11.4336	0.000896113	3.38412e-07	2275.31
370	9.32082																	396	9.35057	8.69962	10.0015	7.26642	11.4347	0.000878796	3.34941e-07	2284.66
371	9.32226																	397	9.35144	8.69965	10.0032	7.26703	11.4359	0.000861812	3.28867e-07	2294.01
372	9.32368																	398	9.3523	8.69968	10.0049	7.26763	11.437	0.000845155	3.21925e-07	2303.36
373	9.32507																	399	9.35313	8.6997	10.0066	7.26821	11.4381	0.000828818	3.14984e-07	2312.72
374	9.32643																	400	9.35395	8.69971	10.0082	7.26877	11.4391	0.000812795	3.09777e-07	2322.07
375	9.32777	8.89111																401	9.35476	8.69972	10.0098	7.26933	11.4402	0.000797081	3.04571e-07	2331.43
376	9.32908																	402	9.35555	8.69972	10.0114	7.26987	11.4412	0.00078167	3.011e-07	2340.78
377	9.33036																	403	9.35632	8.69972	10.0129	7.2704	11.4422	0.000766555	2.91555e-07	2350.14
378	9.33162																	404	9.35708	8.69971	10.0145	7.27092	11.4432	0.000751731	2.84613e-07	2359.49
379	9.33286																	405	9.35783	8.6997	10.016	7.27142	11.4442	0.000737193	2.81142e-07	2368.85
380	9.33407																	406	9.35856	8.69968	10.0174	7.27192	11.4452	0.000722934	2.76804e-07	2378.21
381	9.33526																	407	9.35927	8.69966	10.0189	7.2724	11.4461	0.000708951	2.7073e-07	2387.57
382	9.33643																	408	9.35997	8.69963	10.0203	7.27287	11.4471	0.000695237	2.64656e-07	2396.93
383	9.33757																	409	9.36066	8.6996	10.0217	7.27333	11.448	0.000681787	2.55978e-07	2406.29
384	9.33869																	410	9.36134	8.69956	10.0231	7.27378	11.4489	0.000668596	2.52507e-07	2415.65
385	9.33979																	411	9.362	8.69952	10.0245	7.27422	11.4498	0.00065566	2.49904e-07	2425.01
386	9.34087																	412	9.36265	8.69948	10.0258	7.27465	11.4506	0.000642973	2.42963e-07	2434.37
387	9.34193																	413	9.36329	8.69943	10.0271	7.27507	11.4515	0.000630531	2.40359e-07	2443.74
388	9.34296																	414	9.36391	8.69938	10.0284	7.27548	11.4523	0.000618329	2.36888e-07	2453.1
389	9.34398																	415	9.36452	8.69933	10.0297	7.27588	11.4532	0.000606362	2.26476e-07	2462.46
390	9.34498																	416	9.36512	8.69927	10.031	7.27627	11.454	0.000594625	2.23005e-07	2471.83
391	9.34596																	417	9.36571	8.69921	10.0322	7.27665	11.4548	0.000583116	2.20402e-07	2481.19
392	9.34692																	418	9.36629	8.69915	10.0334	7.27703	11.4556	0.000571828	2.19534e-07	2490.56
393	9.34786																	419	9.36686	8.69908	10.0346	7.27739	11.4563	0.000560759	2.14328e-07	2499.93
394	9.34878																	420	9.36741	8.69902	10.0358	7.27775	11.4571	0.000549902	2.09121e-07	2509.29
395	9.34968																	421	9.36796	8.69895	10.037	7.2781	11.4578	0.000539256	2.08254e-07	2518.66
396	9.35057																	422	9.36849	8.69887	10.0381	7.27844	11.4585	0.000528815	2.0218e-07	2528.03
397	9.35144																	423	9.36901	8.6988	10.0392	7.27877	11.4593	0.000518575	1.97841e-07	2537.4
398	9.3523																	424	9.36953	8.69873	10.0403	7.27909	11.46	0.000508534	1.92635e-07	2546.77
399	9.35313																	425	9.37003	8.69865	10.0414	7.27941	11.4607	0.000498686	1.89164e-07	2556.14
400	9.35395	8.89111																426	9.37052	8.69857	10.0425	7.27972	11.4613	0.000489028	1.85693e-07	2565.51
401	9.35476																	427	9.37101	8.69849	10.0435	7.28002	11.462	0.000479557	1.83957e-07	2574.88
402	9.35555																	428	9.37148	8.69841	10.0446	7.28032	11.4626	0.000470269	1.82222e-07	2584.25
403	9.35632																	429	9.37195	8.69832	10.0456	7.28061	11.4633	0.00046116	1.76148e-07	2593.62
404	9.35708																	430	9.37241	8.69824	10.0466	7.28089	11.4639	0.000452228	1.70074e-07	2602.99
405	9.35783																	431	9.37285	8.69815	10.0476	7.28116	11.4645	0.000443468	1.71809e-07	2612.37
406	9.35856																	432	9.37329	8.69806	10.0485	7.28143	11.4652	0.000434877	1.70074e-07	2621.74
407	9.35927																	433	9.37372	8.69798	10.0495	7.2817	11.4657	0.000426452	1.64867e-07	2631.11
408	9.35997																	434	9.37415	8.69789	10.0504	7.28195	11.4663	0.00041819	1.60529e-07	2640.49
409	9.36066																	435	9.37456	8.6978	10.0513	7.2822	11.4669	0.000410088	1.5619e-07	2649.86
410	9.36134																	436	9.37497	8.69771	10.0522	7.28245	11.4675	0.000402142	1.53587e-07	2659.24
411	9.362																	437	9.37536	8.69761	10.0531	7.28269	11.468	0.00039435	1.51852e-07	2668.61
412	9.36265																	438	9.37575	8.69752	10.054	7.28292	11.4686	0.000386709	1.47513e-07	2677.99
413	9.36329																	439	9.37614	8.69743	10.0548	7.28315	11.4691	0.000379215	1.46645e-07	2687.36
414	9.36391																	440	9.37651	8.69733	10.0557	7.28338	11.4697	0.000371867	1.41439e-07	2696.74
415	9.36452																	441	9.37688	8.69724	10.0565	7.28359	11.4702	0.00036466	1.42307e-07	2706.12
416	9.36512																	442	9.37724	8.69715	10.0573	7.28381	11.4707	0.000357593	1.36233e-07	2715.49
417	9.36571																	443	9.3776	8.69705	10.0581	7.28402	11.4712	0.000350663	1.35365e-07	2724.87
418	9.36629																	444	9.37794	8.69696	10.0589	7.28422	11.4717	0.000343866	1.33629e-07	2734.25
419	9.36686																	445	9.37828	8.69686	10.0597	7.28442	11.4722	0.000337201	1.28423e-07	2743.63
420	9.36741																	446	9.37862	8.69677	10.0605	7.28461	11.4726	0.000330666	1.23217e-07	2753
421	9.36796																	447	9.37895	8.69667	10.0612	7.2848	11.4731	0.000324256	1.20614e-07	2762.38
422	9.36849																	448	9.37927	8.69658	10.062	7.28499	11.4735	0.000317971	1.18878e-07	2771.76
423	9.36901																	449	9.37958	8.69648	10.0627	7.28517	11.474	0.000311807	1.18878e-07	2781.14
424	9.36953																	450	9.37989	8.69639	10.0634	7.28534	11.4744	0.000305762	1.1801e-07	2790.52
425	9.37003	8.89111																451	9.38019	8.69629	10.0641	7.28552	11.4749	0.000299835	1.17143e-07	2799.9
426	9.37052																	452	9.38049	8.69619	10.0648	7.28569	11.4753	0.000294022	1.11069e-07	2809.28
427	9.37101																	453	9.38078	8.6961	10.0655	7.28585	11.4757	0.000288322	1.10201e-07	2818.66
428	9.37148																	454	9.38107	8.696	10.0661	7.28601	11.4761	0.000282732	1.0673e-07	2828.04
429	9.37195																	455	9.38135	8.69591	10.0668	7.28617	11.4765	0.00027725	1.04995e-07	2837.42
430	9.37241																	456	9.38162	8.69581	10.0674	7.28632	11.4769	0.000271874	1.02391e-07	2846.81
431	9.37285																	457	9.38189	8.69572	10.0681	7.28647	11.4773	0.000266603	9.97882e-08	2856.19
432	9.37329																	458	9.38215	8.69563	10.0687	7.28662	11.4777	0.000261433	1.01524e-07	2865.57
433	9.37372																	459	9.38241	8.69553	10.0693	7.28676	11.4781	0.000256364	9.7185e-08	2874.95
434	9.37415																	460	9.38267	8.69544	10.0699	7.2869	11.4784	0.000251393	9.80527e-08	2884.33
435	9.37456																	461	9.38292	8.69535	10.0705	7.28704	11.4788	0.000246518	9.45818e-08	2893.72
436	9.37497																	462	9.38316	8.69525	10.0711	7.28717	11.4791	0.000241737	9.02432e-08	2903.1
437	9.37536																	463	9.3834	8.69516	10.0716	7.2873	11.4795	0.000237049	9.19787e-08	2912.48
438	9.37575																	464	9.38363	8.69507	10.0722	7.28743	11.4798	0.000232452	8.93755e-08	2921.87
439	9.37614																	465	9.38386	8.69498	10.0728	7.28756	11.4802	0.000227944	8.59046e-08	2931.25
440	9.37651																	466	9.38409	8.69489	10.0733	7.28768	11.4805	0.000223523	8.67723e-08	2940.63
441	9.37688																	467	9.38431	8.6948	10.0738	7.2878	11.4808	0.000219188	8.06983e-08	2950.02
442	9.37724																	468	9.38453	8.69471	10.0744	7.28791	11.4811	0.000214937	8.1566e-08	2959.4
443	9.3776																	469	9.38474	8.69462	10.0749	7.28803	11.4815	0.000210768	8.1566e-08	2968.79
444	9.37794																	470	9.38495	8.69453	10.0754	7.28814	11.4818	0.00020668	7.80951e-08	2978.17
445	9.37828																	471	9.38515	8.69444	10.0759	7.28825	11.4821	0.000202671	7.98305e-08	2987.56
446	9.37862																	472	9.38536	8.69435	10.0764	7.28835	11.4824	0.00019874	7.63596e-08	2996.94
447	9.37895																	473	9.38555	8.69427	10.0768	7.28845	11.4826	0.000194885	7.54919e-08	3006.33
448	9.37927																	474	9.38575	8.69418	10.0773	7.28856	11.4829	0.000191105	7.46242e-08	3015.71
449	9.37958																	475	9.38593	8.69409	10.0778	7.28865	11.4832	0.000187397	7.28888e-08	3025.1
450	9.37989	8.89111																476	9.38612	8.69401	10.0782	7.28875	11.4835	0.000183762	6.85501e-08	3034.49
451	9.38019																	477	9.3863	8.69392	10.0787	7.28884	11.4838	0.000180197	6.94179e-08	3043.87
452	9.38049																	478	9.38648	8.69384	10.0791	7.28894	11.484	0.000176702	6.76824e-08	3053.26
453	9.38078																	479	9.38666	8.69376	10.0796	7.28903	11.4843	0.000173274	6.85501e-08	3062.65
454	9.38107																	480	9.38683	8.69367	10.08	7.28911	11.4845	0.000169912	6.5947e-08	3072.03
455	9.38135																	481	9.387	8.69359	10.0804	7.2892	11.4848	0.000166616	6.5947e-08	3081.42
456	9.38162																	482	9.38716	8.69351	10.0808	7.28928	11.485	0.000163384	6.16083e-08	3090.81
457	9.38189																	483	9.38732	8.69343	10.0812	7.28936	11.4853	0.000160214	6.07406e-08	3100.19
458	9.38215																	484	9.38748	8.69335	10.0816	7.28944	11.4855	0.000157105	6.16083e-08	3109.58
459	9.38241																	485	9.38764	8.69327	10.082	7.28952	11.4858	0.000154057	5.98729e-08	3118.97
460	9.38267																	486	9.38779	8.69319	10.0824	7.2896	11.486	0.000151068	5.6402e-08	3128.36
461	9.38292																	487	9.38794	8.69312	10.0828	7.28967	11.4862	0.000148137	5.72697e-08	3137.74
462	9.38316																	488	9.38809	8.69304	10.0831	7.28975	11.4864	0.000145263	5.20634e-08	3147.13
463	9.3834																	489	9.38823	8.69296	10.0835	7.28982	11.4866	0.000142445	5.37988e-08	3156.52
464	9.38363																	490	9.38837	8.69289	10.0839	7.28989	11.4869	0.000139681	5.29311e-08	3165.91
465	9.38386																	491	9.38851	8.69281	10.0842	7.28995	11.4871	0.00013697	5.11957e-08	3175.3
466	9.38409																	492	9.38864	8.69274	10.0845	7.29002	11.4873	0.000134313	4.68571e-08	3184.69
467	9.38431																	493	9.38878	8.69267	10.0849	7.29008	11.4875	0.000131707	5.11957e-08	3194.07
468	9.38453																	494	9.38891	8.69259	10.0852	7.29015	11.4877	0.000129151	4.85925e-08	3203.46
469	9.38474																	495	9.38904	8.69252	10.0856	7.29021	11.4879	0.000126645	4.77248e-08	3212.85
470	9.38495																	496	9.38916	8.69245	10.0859	7.29027	11.4881	0.000124187	4.85925e-08	3222.24
471	9.38515																	497	9.38928	8.69238	10.0862	7.29033	11.4882	0.000121777	4.85925e-08	3231.63
472	9.38536																	498	9.3894	8.69231	10.0865	7.29038	11.4884	0.000119414	4.59893e-08	3241.02
473	9.38555																	499	9.38952	8.69224	10.0868	7.29044	11.4886	0.000117097	4.77248e-08	3250.41
474	9.38575																	500	9.38964	8.69217	10.0871	7.2905	11.4888	0.000114825	4.68571e-08	3259.8
475	9.38593	8.89111
476	9.38612
477	9.3863
478	9.38648
479	9.38666
480	9.38683
481	9.387
482	9.38716
483	9.38732
484	9.38748
485	9.38764
486	9.38779
487	9.38794
488	9.38809
489	9.38823
490	9.38837
491	9.38851
492	9.38864
493	9.38878
494	9.38891
495	9.38904
496	9.38916
497	9.38928
498	9.3894
499	9.38952
500	9.38964	11.67

## Sheet: Gompertz 3
T3
Gompertz M(a,b,c)	Parameters	Std Error	T Value	95% Conf Lim	95% Conf Lim	X Observed	Y Observed	Y Predicted	Y Residual	Y Residual%	95% Conf Lim	95% Conf Lim	95% Pred Lim	95% Pred Lim	First Deriv	Second Deriv	Area	X Generated	Y Predicted	95% Conf Lim	95% Conf Lim	95% Pred Lim	95% Pred Lim	First Deriv	Second Deriv	Area
8001	7.41398	0.225244	32.9153	6.94076	7.8872	0	0	2.11567e-22	-2.11567e-22	0	-1.89148e-20	1.93379e-20	-1.28727	1.28727	3.22392e-22	7.05625e-22	0	0	2.11567e-22	-1.89148e-20	1.93379e-20	-1.28727	1.28727	3.22392e-22	7.05625e-22	0
0.971503	0.0800718	0.0150131	5.33347	0.0485305	0.111613	4.07639	0	7.37915e-20	-7.37915e-20	0	-5.67732e-18	5.82491e-18	-1.28727	1.28727	9.97642e-20	1.7056e-19	5.33077e-20	1	9.49771e-22	-8.18497e-20	8.37492e-20	-1.28727	1.28727	1.40542e-21	2.89545e-21	4.93329e-22
0.966474	100.479	9.24627	10.867	81.0532	119.905	8.07639	0	1.21333e-17	-1.21333e-17	0	-8.04731e-16	8.28998e-16	-1.28727	1.28727	1.45866e-17	1.95498e-17	9.85733e-18	2	4.08248e-21	-3.39109e-19	3.47274e-19	-1.28727	1.28727	5.86629e-21	1.13754e-20	2.64903e-21
0.612719						12.0764	0	1.13358e-15	-1.13358e-15	0	-6.47364e-14	6.70036e-14	-1.28727	1.28727	1.2118e-15	1.27177e-15	1.03277e-15	3	1.68232e-20	-1.34683e-18	1.38048e-18	-1.28727	1.28727	2.34747e-20	4.28424e-20	1.16766e-20
306.826						37.0069	0	1.82937e-07	-1.82937e-07	0	-3.97244e-06	4.33832e-06	-1.28727	1.28727	9.407e-08	2.06955e-08	3.3744e-07	4	6.65433e-20	-5.13414e-18	5.26723e-18	-1.28727	1.28727	9.01667e-20	1.54869e-19	4.79523e-20
						62.0069	0	0.00165182	-0.00165182	0	-0.0122682	0.0155718	-1.2857	1.289	0.000407752	1.63339e-05	0.00603821	5	2.52943e-19	-1.88069e-17	1.93128e-17	-1.28727	1.28727	3.32825e-19	5.3796e-19	1.87989e-19
						87.0069	0	0.130879	-0.130879	0	-0.248848	0.510607	-1.21123	1.47299	0.0155093	6.9302e-05	0.912885	6	9.25053e-19	-6.62769e-17	6.8127e-17	-1.28727	1.28727	1.18198e-18	1.79776e-18	7.07919e-19
						112.007	2.03722	1.06768	0.969547	47.5916	0.106835	2.02852	-0.538652	2.674	0.0607358	-5.53855e-05	13.4634	7	3.25851e-18	-2.2495e-16	2.31467e-16	-1.28727	1.28727	4.04311e-18	5.78624e-18	2.56665e-18
						137.007	2.03722	2.9244	-0.887177	-43.5484	2.08919	3.75961	1.38991	4.45889	0.0798596	-6.36845e-05	62.3663	8	1.10676e-17	-7.36137e-16	7.58273e-16	-1.28727	1.28727	1.33352e-17	1.7956e-17	8.97179e-18
						162.007	4.25944	4.74356	-0.484118	-11.3657	3.96201	5.52512	3.23761	6.24952	0.0621843	-7.51859e-06	159.168	9	3.62847e-17	-2.32508e-15	2.39765e-15	-1.28727	1.28727	4.24544e-17	5.37814e-17	3.02698e-17
						187.007	7.03778	5.98339	1.05439	14.9818	5.26194	6.70484	4.50773	7.45905	0.0376538	1.30684e-05	294.543	10	1.14942e-16	-7.09526e-15	7.32515e-15	-1.28727	1.28727	1.30595e-16	1.55634e-16	9.8676e-17
						212.007	7.03778	6.68893	0.348844	4.95673	6.13443	7.24344	5.28731	8.09056	0.0202071	1.22194e-05	453.855	11	3.52165e-16	-2.09401e-14	2.16445e-14	-1.28727	1.28727	3.88551e-16	4.35571e-16	3.11113e-16
						237.007	7.03778	7.05661	-0.0188274	-0.26752	6.62884	7.48437	5.70012	8.41309	0.0102336	7.53288e-06	626.192	12	1.04459e-15	-5.9826e-14	6.19152e-14	-1.28727	1.28727	1.11918e-15	1.18008e-15	9.49619e-16
						262.007	7.03778	7.24022	-0.20244	-2.87647	6.84611	7.63433	5.89397	8.58647	0.00504044	4.03633e-06	805.17	13	3.00254e-15	-1.65617e-13	1.71623e-13	-1.28727	1.28727	3.12387e-15	3.09792e-15	2.80874e-15
						287.007	7.03778	7.33005	-0.292272	-4.15291	6.92023	7.73987	5.97912	8.68098	0.00244968	2.04155e-06	987.433	14	8.37077e-15	-4.44654e-13	4.61396e-13	-1.28727	1.28727	8.4571e-15	7.88727e-15	8.05749e-15
						312.007	7.03778	7.37357	-0.335792	-4.77127	6.94091	7.80623	6.01553	8.73161	0.00118295	1.00226e-06	1171.29	15	2.26549e-14	-1.15883e-12	1.20414e-12	-1.28727	1.28727	2.22264e-14	1.94924e-14	2.24387e-14
						337.007	7.03778	7.39455	-0.356775	-5.06942	6.94491	7.84419	6.03101	8.7581	0.000569488	4.87166e-07	1355.93	16	5.95729e-14	-2.9341e-12	3.05324e-12	-1.28727	1.28727	5.67555e-14	4.68011e-14	6.07125e-14
						362.007	7.03778	7.40465	-0.366869	-5.21285	6.94448	7.86481	6.0376	8.7717	0.000273755	2.33839e-07	1540.93	17	1.52332e-13	-7.22343e-12	7.5281e-12	-1.28727	1.28727	1.40929e-13	1.0926e-13	1.59736e-13
						387.007	7.03778	7.4095	-0.371719	-5.28177	6.9433	7.87569	6.04041	8.77859	0.000131502	1.11723e-07	1726.12	18	3.79084e-13	-1.73053e-11	1.80635e-11	-1.28727	1.28727	3.40563e-13	2.48215e-13	4.08998e-13
						412.007	7.03778	7.41183	-0.374049	-5.31487	6.94232	7.88133	6.0416	8.78205	6.31471e-05	5.32634e-08	1911.39	19	9.18814e-13	-4.03757e-11	4.22134e-11	-1.28727	1.28727	8.01568e-13	5.4916e-13	1.01994e-12
						437.007	9.07611	7.41295	1.66317	18.3247	6.94167	7.88422	6.04211	8.78378	3.03183e-05	2.85804e-08	2096.7	20	2.17068e-12	-9.18118e-11	9.61532e-11	-1.28727	1.28727	1.83891e-12	1.18414e-12	2.47912e-12
																		21	5.00225e-12	-2.03627e-10	2.13631e-10	-1.28727	1.28727	4.1151e-12	2.49034e-12	5.87769e-12
																		22	1.12524e-11	-4.40797e-10	4.63302e-10	-1.28727	1.28727	8.98902e-12	5.11186e-12	1.36025e-11
																		23	2.47252e-11	-9.31997e-10	9.81448e-10	-1.28727	1.28727	1.91804e-11	1.02486e-11	3.0749e-11
																		24	5.31062e-11	-1.92599e-09	2.03221e-09	-1.28727	1.28727	4.00051e-11	2.00821e-11	6.79429e-11
X Generated	Y Predicted	Y Observed																25	1.11569e-10	-3.89265e-09	4.11579e-09	-1.28727	1.28727	8.16144e-11	3.84854e-11	1.46839e-10
0	2.11567e-22	0																26	2.29414e-10	-7.69948e-09	8.1583e-09	-1.28727	1.28727	1.62964e-10	7.21774e-11	3.10597e-10
1	9.49771e-22																	27	4.61994e-10	-1.49132e-08	1.58372e-08	-1.28727	1.28727	3.18684e-10	1.32554e-10	6.43408e-10
2	4.08248e-21																	28	9.11716e-10	-2.83034e-08	3.01268e-08	-1.28727	1.28727	6.1071e-10	2.38523e-10	1.30607e-09
3	1.68232e-20																	29	1.76418e-09	-5.26639e-08	5.61923e-08	-1.28727	1.28727	1.14754e-09	4.20792e-10	2.59953e-09
4	6.65433e-20	0																30	3.34912e-09	-9.61263e-08	1.02825e-07	-1.28727	1.28727	2.11548e-09	7.28194e-10	5.07595e-09
5	2.52943e-19																	31	6.24119e-09	-1.72212e-07	1.84695e-07	-1.28727	1.28727	3.82822e-09	1.23682e-09	9.72908e-09
6	9.25053e-19																	32	1.14231e-08	-3.02977e-07	3.25823e-07	-1.28727	1.28727	6.804e-09	2.06291e-09	1.83144e-08
7	3.25851e-18																	33	2.05449e-08	-5.23725e-07	5.64814e-07	-1.28727	1.28727	1.18833e-08	3.38054e-09	3.38769e-08
8	1.10676e-17	0																34	3.63289e-08	-8.89945e-07	9.62603e-07	-1.28727	1.28727	2.0405e-08	5.4456e-09	6.16066e-08
9	3.62847e-17																	35	6.31886e-08	-1.48731e-06	1.61369e-06	-1.28727	1.28727	3.44647e-08	8.62714e-09	1.10198e-07
10	1.14942e-16																	36	1.08161e-07	-2.44582e-06	2.66214e-06	-1.28727	1.28727	5.72872e-08	1.34479e-08	1.93978e-07
11	3.52165e-16																	37	1.82285e-07	-3.95939e-06	4.32396e-06	-1.28727	1.28727	9.37538e-08	2.06351e-08	3.36172e-07
12	1.04459e-15	0																38	3.02603e-07	-6.31261e-06	6.91781e-06	-1.28727	1.28727	1.51134e-07	3.11829e-08	5.73848e-07
13	3.00254e-15																	39	4.95025e-07	-9.91637e-06	1.09064e-05	-1.28727	1.28727	2.40087e-07	4.64268e-08	9.65271e-07
14	8.37077e-15																	40	7.98359e-07	-1.53547e-05	1.69515e-05	-1.28727	1.28727	3.76003e-07	6.8131e-08	1.60067e-06
15	2.26549e-14																	41	1.26989e-06	-2.34452e-05	2.5985e-05	-1.28727	1.28728	5.80776e-07	9.8587e-08	2.61777e-06
16	5.95729e-14																	42	1.99297e-06	-3.5315e-05	3.9301e-05	-1.28727	1.28728	8.85107e-07	1.40722e-07	4.22389e-06
17	1.52332e-13																	43	3.08726e-06	-5.24958e-05	5.86703e-05	-1.28727	1.28728	1.33144e-06	1.98216e-07	6.72689e-06
18	3.79084e-13																	44	4.72224e-06	-7.7039e-05	8.64835e-05	-1.28727	1.28728	1.97764e-06	2.75619e-07	1.05779e-05
19	9.18814e-13																	45	7.13483e-06	-0.000111654	0.000125923	-1.28727	1.28728	2.90157e-06	3.78464e-07	1.64296e-05
20	2.17068e-12																	46	1.06521e-05	-0.000159869	0.000181173	-1.28726	1.28728	4.20664e-06	5.13378e-07	2.52145e-05
21	5.00225e-12																	47	1.57199e-05	-0.000226221	0.00025766	-1.28726	1.28729	6.0284e-06	6.88163e-07	3.82489e-05
22	1.12524e-11																	48	2.29391e-05	-0.000316459	0.000362337	-1.28725	1.2873	8.5424e-06	9.11859e-07	5.73692e-05
23	2.47252e-11																	49	3.31096e-05	-0.000437783	0.000504002	-1.28724	1.28731	1.19732e-05	1.19476e-06	8.5108e-05
24	5.31062e-11																	50	4.72849e-05	-0.000599087	0.000693656	-1.28723	1.28732	1.66046e-05	1.5484e-06	0.00012492
25	1.11569e-10																	51	6.68364e-05	-0.000811223	0.000944896	-1.28721	1.28734	2.27914e-05	1.98546e-06	0.000181465
26	2.29414e-10																	52	9.35311e-05	-0.00108727	0.00127433	-1.28718	1.28737	3.09717e-05	2.51964e-06	0.000260968
27	4.61994e-10																	53	0.000129622	-0.00144277	0.00170202	-1.28715	1.2874	4.1681e-05	3.16543e-06	0.000371653
28	9.11716e-10																	54	0.00017795	-0.00189603	0.00225193	-1.2871	1.28745	5.55663e-05	3.93784e-06	0.000524283
29	1.76418e-09																	55	0.000242069	-0.00246826	0.0029524	-1.28703	1.28752	7.34012e-05	4.85206e-06	0.000732808
30	3.34912e-09																	56	0.000326373	-0.00318379	0.00383654	-1.28695	1.2876	9.61012e-05	5.92303e-06	0.00101514
31	6.24119e-09																	57	0.000436249	-0.00407018	0.00494268	-1.28685	1.28772	0.000124739	7.16494e-06	0.00139406
32	1.14231e-08																	58	0.000578241	-0.00515824	0.00631472	-1.28671	1.28786	0.000160556	8.59076e-06	0.00189833
33	2.05449e-08																	59	0.000760228	-0.00648196	0.00800242	-1.28653	1.28805	0.000204981	1.02117e-05	0.00256386
34	3.63289e-08																	60	0.00099161	-0.00807842	0.0100616	-1.28631	1.2883	0.000259634	1.20364e-05	0.00343523
35	6.31886e-08																	61	0.00128351	-0.00998741	0.0125544	-1.28604	1.28861	0.000326341	1.40709e-05	0.00456723
36	1.08161e-07																	62	0.00164899	-0.0122511	0.0155491	-1.2857	1.289	0.000407137	1.63176e-05	0.00602675
37	1.82285e-07	0																63	0.00210323	-0.0149136	0.01912	-1.28528	1.28949	0.000504268	1.87749e-05	0.00789477
38	3.02603e-07																	64	0.00266378	-0.01802	0.0233475	-1.28478	1.2901	0.000620191	2.14369e-05	0.0102686
39	4.95025e-07																	65	0.00335076	-0.0216158	0.0283173	-1.28417	1.29087	0.000757567	2.42931e-05	0.0132644
40	7.98359e-07																	66	0.00418702	-0.0257461	0.0341201	-1.28343	1.29181	0.000919251	2.73281e-05	0.0170199
41	1.26989e-06																	67	0.00519837	-0.0304543	0.040851	-1.28257	1.29297	0.00110828	3.05214e-05	0.0216968
42	1.99297e-06																	68	0.00641374	-0.0357809	0.0486084	-1.28155	1.29438	0.00132783	3.38478e-05	0.0274846
43	3.08726e-06																	69	0.00786532	-0.0417626	0.0574933	-1.28036	1.2961	0.00158125	3.72771e-05	0.034603
44	4.72224e-06																	70	0.00958867	-0.048431	0.0676083	-1.27899	1.29817	0.00187194	4.07749e-05	0.0433058
45	7.13483e-06																	71	0.0116228	-0.0558108	0.0790564	-1.27742	1.30066	0.00220342	4.43026e-05	0.0538839
46	1.06521e-05																	72	0.0140103	-0.063919	0.0919395	-1.27562	1.30364	0.0025792	4.78183e-05	0.0666691
47	1.57199e-05																	73	0.0167971	-0.0727635	0.106358	-1.27359	1.30718	0.00300278	5.12773e-05	0.0820375
48	2.29391e-05																	74	0.0200329	-0.0823419	0.122408	-1.27131	1.31137	0.00347764	5.46329e-05	0.100413
49	3.31096e-05																	75	0.0237706	-0.0926401	0.140181	-1.26876	1.3163	0.00400712	5.78375e-05	0.122271
50	4.72849e-05																	76	0.0280665	-0.103632	0.159765	-1.26593	1.32206	0.00459442	6.0843e-05	0.14814
51	6.68364e-05																	77	0.0329797	-0.115277	0.181237	-1.2628	1.32876	0.00524254	6.36019e-05	0.178609
52	9.35311e-05																	78	0.0385727	-0.127523	0.204668	-1.25937	1.33652	0.00595424	6.60684e-05	0.214326
53	0.000129622																	79	0.0449103	-0.140301	0.230121	-1.25562	1.34544	0.00673198	6.8199e-05	0.256003
54	0.00017795																	80	0.0520594	-0.153527	0.257646	-1.25153	1.35565	0.00757789	6.99535e-05	0.304417
55	0.000242069																	81	0.0600893	-0.167106	0.287285	-1.24708	1.36726	0.00849372	7.12957e-05	0.360415
56	0.000326373																	82	0.0690706	-0.180925	0.319066	-1.24225	1.38039	0.0094808	7.21941e-05	0.424913
57	0.000436249																	83	0.079075	-0.194857	0.353007	-1.23702	1.39517	0.01054	7.26227e-05	0.498898
58	0.000578241																	84	0.0901749	-0.208764	0.389114	-1.23135	1.4117	0.0116719	7.25601e-05	0.583428
59	0.000760228																	85	0.102443	-0.222495	0.42738	-1.22521	1.43009	0.0128762	7.19926e-05	0.679637
60	0.00099161																	86	0.115951	-0.235885	0.467787	-1.21854	1.45044	0.0141525	7.09116e-05	0.788728
61	0.00128351																	87	0.130772	-0.248761	0.510304	-1.21129	1.47283	0.0154997	6.93147e-05	0.911977
62	0.00164899	0																88	0.146974	-0.260943	0.55489	-1.20339	1.49733	0.0169161	6.72069e-05	1.05073
63	0.00210323																	89	0.164626	-0.272241	0.601493	-1.19476	1.52401	0.0183997	6.45984e-05	1.20641
64	0.00266378																	90	0.183795	-0.282462	0.650051	-1.18532	1.55291	0.0199478	6.15047e-05	1.38049
65	0.00335076																	91	0.204542	-0.291409	0.700493	-1.17497	1.58405	0.0215575	5.79489e-05	1.57452
66	0.00418702																	92	0.226929	-0.298882	0.75274	-1.16359	1.61745	0.023225	5.39575e-05	1.79012
67	0.00519837																	93	0.25101	-0.304685	0.806705	-1.15108	1.65311	0.0249464	4.9562e-05	2.02895
68	0.00641374																	94	0.276838	-0.30862	0.862296	-1.13732	1.69099	0.0267174	4.47976e-05	2.29272
69	0.00786532																	95	0.30446	-0.310496	0.919416	-1.12216	1.73108	0.0285332	3.97045e-05	2.58322
70	0.00958867																	96	0.333918	-0.310128	0.977964	-1.10548	1.77332	0.0303886	3.43225e-05	2.90225
71	0.0116228																	97	0.365249	-0.307339	1.03784	-1.08715	1.81764	0.0322784	2.86977e-05	3.25168
72	0.0140103																	98	0.398484	-0.301959	1.09893	-1.06702	1.86399	0.0341968	2.28729e-05	3.63339
73	0.0167971																	99	0.43365	-0.293832	1.16113	-1.04497	1.91227	0.0361381	1.68975e-05	4.04929
74	0.0200329																	100	0.470766	-0.282813	1.22434	-1.02086	1.96239	0.0380962	1.0815e-05	4.50134
75	0.0237706																	101	0.509846	-0.268771	1.28846	-0.994587	2.01428	0.0400652	4.67322e-06	4.99148
76	0.0280665																	102	0.550898	-0.25159	1.35339	-0.966027	2.06782	0.0420389	-1.48358e-06	5.52169
77	0.0329797																	103	0.593923	-0.23117	1.41902	-0.935081	2.12293	0.044011	-7.60961e-06	6.09393
78	0.0385727																	104	0.638917	-0.207427	1.48526	-0.901658	2.17949	0.0459756	-1.36653e-05	6.71019
79	0.0449103																	105	0.68587	-0.180294	1.55203	-0.865682	2.23742	0.0479265	-1.96095e-05	7.37242
80	0.0520594																	106	0.734764	-0.149722	1.61925	-0.827091	2.29662	0.0498578	-2.54052e-05	8.08257
81	0.0600893																	107	0.785577	-0.115679	1.68683	-0.785835	2.35699	0.0517637	-3.10192e-05	8.84259
82	0.0690706																	108	0.838281	-0.0781512	1.75471	-0.741884	2.41845	0.0536387	-3.64172e-05	9.65436
83	0.079075																	109	0.892842	-0.0371428	1.82283	-0.695221	2.48091	0.0554772	-4.15746e-05	10.5198
84	0.0901749																	110	0.949221	0.00732478	1.89112	-0.645847	2.54429	0.0572742	-4.64626e-05	11.4406
85	0.102443																	111	1.00737	0.0552131	1.95954	-0.593777	2.60853	0.0590247	-5.10639e-05	12.4188
86	0.115951																	112	1.06725	0.106467	2.02804	-0.539042	2.67355	0.0607242	-5.53553e-05	13.456
87	0.130772	0																113	1.1288	0.161016	2.09659	-0.481689	2.7393	0.0623684	-5.93278e-05	14.5539
88	0.146974																	114	1.19197	0.218772	2.16517	-0.421779	2.80572	0.0639532	-6.29653e-05	15.7141
89	0.164626																	115	1.25669	0.279636	2.23374	-0.359388	2.87277	0.0654752	-6.62621e-05	16.9383
90	0.183795																	116	1.3229	0.343494	2.3023	-0.294602	2.9404	0.0669308	-6.92093e-05	18.228
91	0.204542																	117	1.39053	0.410217	2.37084	-0.227521	3.00858	0.0683174	-7.18093e-05	19.5846
92	0.226929																	118	1.45951	0.479669	2.43935	-0.158255	3.07727	0.0696321	-7.40617e-05	21.0095
93	0.25101																	119	1.52977	0.551699	2.50784	-0.0869236	3.14646	0.0708728	-7.59642e-05	22.504
94	0.276838																	120	1.60123	0.626151	2.57631	-0.0136548	3.21611	0.0720376	-7.75275e-05	24.0694
95	0.30446																	121	1.67382	0.702858	2.64478	0.0614166	3.28622	0.0731248	-7.87565e-05	25.7069
96	0.333918																	122	1.74745	0.781646	2.71326	0.13815	3.35676	0.0741334	-7.96595e-05	27.4174
97	0.365249																	123	1.82206	0.862337	2.78178	0.2164	3.42772	0.0750623	-8.02479e-05	29.2021
98	0.398484																	124	1.89755	0.944748	2.85035	0.296018	3.49908	0.075911	-8.0534e-05	31.0618
99	0.43365																	125	1.97385	1.02869	2.91901	0.376854	3.57085	0.0766791	-8.05314e-05	32.9975
100	0.470766																	126	2.05088	1.11398	2.98779	0.458758	3.64301	0.0773668	-8.0253e-05	35.0098
101	0.509846																	127	2.12856	1.20042	3.0567	0.541577	3.71554	0.0779742	-7.97194e-05	37.0995
102	0.550898																	128	2.2068	1.28783	3.12578	0.625163	3.78845	0.0785019	-7.89403e-05	39.2671
103	0.593923																	129	2.28554	1.37602	3.19506	0.70937	3.8617	0.0789508	-7.79312e-05	41.5132
104	0.638917																	130	2.36468	1.4648	3.26456	0.794055	3.93531	0.0793217	-7.67136e-05	43.8383
105	0.68587																	131	2.44416	1.55399	3.33432	0.879078	4.00923	0.0796159	-7.53044e-05	46.2427
106	0.734764																	132	2.52389	1.64343	3.40435	0.964308	4.08347	0.0798348	-7.37169e-05	48.7267
107	0.785577																	133	2.6038	1.73293	3.47467	1.04962	4.15798	0.07998	-7.19683e-05	51.2905
108	0.838281																	134	2.68382	1.82235	3.5453	1.13488	4.23276	0.0800532	-7.00771e-05	53.9343
109	0.892842																	135	2.76388	1.91152	3.61625	1.21999	4.30777	0.0800564	-6.80547e-05	56.6582
110	0.949221																	136	2.84391	2.00031	3.68752	1.30484	4.38299	0.0799915	-6.59275e-05	59.4621
111	1.00737																	137	2.92384	2.08858	3.75911	1.38933	4.45836	0.0798608	-6.36959e-05	62.346
112	1.06725	2.03722																138	3.00361	2.17621	3.83101	1.47336	4.53386	0.0796663	-6.13877e-05	65.3097
113	1.1288																	139	3.08316	2.2631	3.90321	1.55687	4.60945	0.0794104	-5.9012e-05	68.3531
114	1.19197																	140	3.16241	2.34914	3.97568	1.63976	4.68507	0.0790956	-5.65781e-05	71.476
115	1.25669																	141	3.24133	2.43426	4.0484	1.72197	4.76068	0.0787241	-5.41082e-05	74.6779
116	1.3229																	142	3.31984	2.51837	4.12132	1.80345	4.83623	0.0782986	-5.16002e-05	77.9585
117	1.39053																	143	3.39791	2.60142	4.1944	1.88415	4.91167	0.0778215	-4.90826e-05	81.3174
118	1.45951																	144	3.47547	2.68335	4.26759	1.96401	4.98694	0.0772952	-4.65493e-05	84.7541
119	1.52977																	145	3.55248	2.76414	4.34083	2.04299	5.06198	0.0767225	-4.40232e-05	88.2682
120	1.60123																	146	3.6289	2.84374	4.41406	2.12107	5.13673	0.0761057	-4.15049e-05	91.8589
121	1.67382																	147	3.70468	2.92215	4.48721	2.19822	5.21114	0.0754474	-3.9008e-05	95.5257
122	1.74745																	148	3.77978	2.99936	4.56021	2.27441	5.28515	0.0747501	-3.65374e-05	99.268
123	1.82206																	149	3.85417	3.07536	4.63298	2.34964	5.3587	0.0740162	-3.41009e-05	103.085
124	1.89755																	150	3.9278	3.15016	4.70544	2.42388	5.43173	0.0732483	-3.17047e-05	106.976
125	1.97385																	151	4.00066	3.22378	4.77753	2.49712	5.50419	0.0724486	-2.93533e-05	110.94
126	2.05088																	152	4.07269	3.29622	4.84916	2.56937	5.57601	0.0716196	-2.705e-05	114.977
127	2.12856																	153	4.14389	3.36751	4.92026	2.64061	5.64716	0.0707635	-2.48058e-05	119.086
128	2.2068																	154	4.21421	3.43768	4.99074	2.71085	5.71757	0.0698827	-2.26175e-05	123.265
129	2.28554																	155	4.28364	3.50674	5.06055	2.7801	5.78719	0.0689792	-2.04934e-05	127.514
130	2.36468																	156	4.35216	3.57472	5.1296	2.84834	5.85599	0.0680552	-1.84337e-05	131.832
131	2.44416																	157	4.41975	3.64166	5.19783	2.91559	5.92391	0.0671127	-1.64389e-05	136.218
132	2.52389																	158	4.48638	3.70758	5.26519	2.98185	5.99091	0.0661538	-1.45156e-05	140.671
133	2.6038																	159	4.55205	3.7725	5.3316	3.04713	6.05697	0.0651804	-1.26592e-05	145.19
134	2.68382																	160	4.61674	3.83646	5.39702	3.11144	6.12203	0.0641944	-1.08781e-05	149.775
135	2.76388																	161	4.68044	3.89948	5.4614	3.17479	6.18608	0.0631974	-9.16651e-06	154.423
136	2.84391																	162	4.74313	3.96158	5.52468	3.23718	6.24908	0.0621913	-7.53093e-06	159.135
137	2.92384	2.03722																163	4.80482	4.02279	5.58684	3.29861	6.31102	0.0611776	-5.9642e-06	163.909
138	3.00361																	164	4.86548	4.08313	5.64784	3.35911	6.37185	0.060158	-4.46633e-06	168.744
139	3.08316																	165	4.92513	4.14262	5.70764	3.41868	6.43158	0.0591339	-3.04576e-06	173.64
140	3.16241																	166	4.98375	4.20128	5.76622	3.47732	6.49018	0.0581067	-1.69534e-06	178.594
141	3.24133																	167	5.04134	4.25913	5.82355	3.53505	6.54764	0.0570779	-4.0792e-07	183.607
142	3.31984																	168	5.09791	4.31619	5.87963	3.59186	6.60395	0.0560486	8.06097e-07	188.677
143	3.39791																	169	5.15344	4.37246	5.93442	3.64778	6.6591	0.0550201	1.95516e-06	193.802
144	3.47547																	170	5.20795	4.42796	5.98793	3.7028	6.71309	0.0539936	3.03017e-06	198.983
145	3.55248																	171	5.26143	4.4827	6.04015	3.75694	6.76592	0.0529701	4.04802e-06	204.218
146	3.6289																	172	5.31389	4.5367	6.09107	3.8102	6.81758	0.0519506	5.00481e-06	209.506
147	3.70468																	173	5.36533	4.58997	6.14069	3.86258	6.86808	0.0509362	5.89665e-06	214.845
148	3.77978																	174	5.41576	4.6425	6.18902	3.9141	6.91743	0.0499276	6.73133e-06	220.236
149	3.85417																	175	5.46519	4.69432	6.23606	3.96475	6.96563	0.0489258	7.50949e-06	225.677
150	3.9278																	176	5.51362	4.74542	6.28182	4.01455	7.01268	0.0479315	8.23115e-06	231.166
151	4.00066																	177	5.56105	4.79581	6.3263	4.0635	7.05861	0.0469454	8.89759e-06	236.704
152	4.07269																	178	5.60751	4.8455	6.36952	4.1116	7.10342	0.0459682	9.51467e-06	242.288
153	4.14389																	179	5.65299	4.89449	6.4115	4.15887	7.14712	0.0450005	1.00824e-05	247.918
154	4.21421																	180	5.69751	4.94279	6.45224	4.20531	7.18972	0.0440428	1.06001e-05	253.594
155	4.28364																	181	5.74108	4.99039	6.49178	4.25091	7.23126	0.0430958	1.10755e-05	259.313
156	4.35216																	182	5.78371	5.03731	6.53011	4.29569	7.27173	0.0421599	1.15062e-05	265.075
157	4.41975																	183	5.82541	5.08354	6.56728	4.33966	7.31115	0.0412354	1.1894e-05	270.88
158	4.48638																	184	5.86618	5.12908	6.60329	4.38281	7.34956	0.0403228	1.22395e-05	276.726
159	4.55205																	185	5.90606	5.17395	6.63817	4.42516	7.38695	0.0394225	1.25526e-05	282.612
160	4.61674																	186	5.94503	5.21813	6.67194	4.4667	7.42336	0.0385348	1.28287e-05	288.538
161	4.68044																	187	5.98313	5.26164	6.70462	4.50745	7.45881	0.0376598	1.30671e-05	294.502
162	4.74313	4.25944																188	6.02036	5.30447	6.73624	4.54741	7.4933	0.0367979	1.32736e-05	300.504
163	4.80482																	189	6.05673	5.34663	6.76683	4.58659	7.52687	0.0359493	1.34555e-05	306.542
164	4.86548																	190	6.09226	5.38811	6.79641	4.62499	7.55954	0.0351142	1.3603e-05	312.617
165	4.92513																	191	6.12696	5.42893	6.825	4.66261	7.59132	0.0342926	1.37199e-05	318.727
166	4.98375																	192	6.16085	5.46907	6.85263	4.69947	7.62223	0.0334848	1.3816e-05	324.871
167	5.04134																	193	6.19394	5.50854	6.87933	4.73557	7.65231	0.0326908	1.38862e-05	331.048
168	5.09791																	194	6.22624	5.54735	6.90512	4.77092	7.68156	0.0319106	1.39355e-05	337.258
169	5.15344																	195	6.25776	5.58549	6.93003	4.80552	7.71001	0.0311444	1.3957e-05	343.5
170	5.20795																	196	6.28853	5.62297	6.95409	4.83938	7.73768	0.0303922	1.39628e-05	349.773
171	5.26143																	197	6.31855	5.65979	6.97732	4.87251	7.7646	0.0296539	1.39505e-05	356.077
172	5.31389																	198	6.34784	5.69594	6.99974	4.90491	7.79077	0.0289295	1.3918e-05	362.41
173	5.36533																	199	6.37642	5.73144	7.02139	4.9366	7.81623	0.0282191	1.38719e-05	368.772
174	5.41576																	200	6.40429	5.76628	7.04229	4.96758	7.84099	0.0275226	1.38069e-05	375.163
175	5.46519																	201	6.43147	5.80047	7.06246	4.99786	7.86507	0.0268398	1.37316e-05	381.581
176	5.51362																	202	6.45797	5.83401	7.08193	5.02745	7.88849	0.0261708	1.36413e-05	388.026
177	5.56105																	203	6.48381	5.8669	7.10072	5.05635	7.91128	0.0255154	1.35387e-05	394.497
178	5.60751																	204	6.50901	5.89915	7.11886	5.08458	7.93344	0.0248736	1.34282e-05	400.993
179	5.65299																	205	6.53356	5.93075	7.13638	5.11213	7.95499	0.0242452	1.33029e-05	407.514
180	5.69751																	206	6.5575	5.96171	7.15329	5.13904	7.97596	0.0236301	1.3173e-05	414.06
181	5.74108																	207	6.58083	5.99204	7.16962	5.16529	7.99637	0.0230281	1.30275e-05	420.629
182	5.78371																	208	6.60356	6.02173	7.18539	5.1909	8.01622	0.0224392	1.28813e-05	427.221
183	5.82541																	209	6.62571	6.05079	7.20063	5.21589	8.03553	0.0218632	1.27228e-05	433.836
184	5.86618																	210	6.64729	6.07923	7.21535	5.24025	8.05433	0.0212999	1.25617e-05	440.473
185	5.90606																	211	6.66831	6.10705	7.22958	5.264	8.07263	0.0207491	1.23935e-05	447.13
186	5.94503																	212	6.68879	6.13425	7.24334	5.28715	8.09043	0.0202108	1.22233e-05	453.809
187	5.98313	7.03778																213	6.70874	6.16083	7.25665	5.30971	8.10777	0.0196846	1.2046e-05	460.508
188	6.02036																	214	6.72817	6.18681	7.26953	5.33169	8.12464	0.0191705	1.18641e-05	467.226
189	6.05673																	215	6.74709	6.21218	7.282	5.3531	8.14107	0.0186683	1.16809e-05	473.964
190	6.09226																	216	6.76551	6.23695	7.29407	5.37394	8.15707	0.0181778	1.14932e-05	480.72
191	6.12696																	217	6.78344	6.26112	7.30577	5.39424	8.17265	0.0176987	1.13068e-05	487.495
192	6.16085																	218	6.80091	6.28471	7.31711	5.41399	8.18783	0.017231	1.11119e-05	494.287
193	6.19394																	219	6.81791	6.30771	7.32812	5.43321	8.20261	0.0167744	1.09223e-05	501.097
194	6.22624																	220	6.83446	6.33013	7.3388	5.45192	8.21701	0.0163287	1.07261e-05	507.923
195	6.25776																	221	6.85057	6.35197	7.34917	5.47011	8.23103	0.0158937	1.05325e-05	514.765
196	6.28853																	222	6.86625	6.37325	7.35925	5.4878	8.2447	0.0154692	1.03383e-05	521.624
197	6.31855																	223	6.88151	6.39397	7.36906	5.505	8.25802	0.0150551	1.01428e-05	528.498
198	6.34784																	224	6.89637	6.41413	7.37861	5.52173	8.271	0.0146512	9.95247e-06	535.387
199	6.37642																	225	6.91082	6.43374	7.3879	5.53798	8.28366	0.0142572	9.755e-06	542.29
200	6.40429																	226	6.92488	6.4528	7.39696	5.55378	8.29599	0.0138729	9.56533e-06	549.208
201	6.43147																	227	6.93857	6.47133	7.4058	5.56912	8.30801	0.0134982	9.37566e-06	556.14
202	6.45797																	228	6.95188	6.48933	7.41443	5.58403	8.31974	0.0131329	9.17885e-06	563.085
203	6.48381																	229	6.96484	6.50681	7.42286	5.59851	8.33117	0.0127767	8.98983e-06	570.044
204	6.50901																	230	6.97744	6.52377	7.4311	5.61256	8.34231	0.0124296	8.79951e-06	577.015
205	6.53356																	231	6.9897	6.54023	7.43917	5.62621	8.35319	0.0120912	8.61309e-06	583.998
206	6.5575																	232	7.00162	6.55619	7.44706	5.63946	8.36379	0.0117615	8.42926e-06	590.994
207	6.58083																	233	7.01322	6.57165	7.4548	5.65232	8.37413	0.0114402	8.24414e-06	598.001
208	6.60356																	234	7.02451	6.58663	7.46239	5.6648	8.38422	0.0111271	8.06291e-06	605.02
209	6.62571																	235	7.03548	6.60113	7.46983	5.6769	8.39406	0.0108221	7.88624e-06	612.05
210	6.64729																	236	7.04615	6.61517	7.47714	5.68865	8.40366	0.010525	7.70631e-06	619.091
211	6.66831																	237	7.05653	6.62875	7.48432	5.70004	8.41303	0.0102356	7.53418e-06	626.143
212	6.68879	7.03778																238	7.06663	6.64187	7.49138	5.71109	8.42217	0.00995368	7.36205e-06	633.204
213	6.70874																	239	7.07644	6.65456	7.49833	5.7218	8.43109	0.00967917	7.19251e-06	640.276
214	6.72817																	240	7.08599	6.66681	7.50517	5.73219	8.43979	0.00941185	7.02623e-06	647.357
215	6.74709																	241	7.09527	6.67864	7.5119	5.74225	8.44829	0.00915155	6.86059e-06	654.448
216	6.76551																	242	7.10429	6.69006	7.51853	5.75201	8.45658	0.00889812	6.70145e-06	661.547
217	6.78344																	243	7.11307	6.70107	7.52506	5.76147	8.46467	0.00865138	6.54361e-06	668.656
218	6.80091																	244	7.1216	6.71169	7.53151	5.77064	8.47256	0.00841119	6.38512e-06	675.774
219	6.81791																	245	7.12989	6.72192	7.53786	5.77952	8.48027	0.00817738	6.23182e-06	682.899
220	6.83446																	246	7.13796	6.73178	7.54414	5.78812	8.48779	0.00794981	6.08437e-06	690.033
221	6.85057																	247	7.14579	6.74127	7.55032	5.79646	8.49513	0.00772831	5.92913e-06	697.175
222	6.86625																	248	7.15341	6.7504	7.55643	5.80453	8.5023	0.00751275	5.78753e-06	704.325
223	6.88151																	249	7.16082	6.75918	7.56246	5.81235	8.5093	0.00730298	5.64787e-06	711.482
224	6.89637																	250	7.16802	6.76763	7.56841	5.81992	8.51613	0.00709885	5.50562e-06	718.646
225	6.91082																	251	7.17502	6.77575	7.57429	5.82725	8.52279	0.00690022	5.36986e-06	725.818
226	6.92488																	252	7.18182	6.78355	7.5801	5.83435	8.5293	0.00670697	5.23411e-06	732.996
227	6.93857																	253	7.18844	6.79104	7.58583	5.84122	8.53566	0.00651894	5.1003e-06	740.181
228	6.95188																	254	7.19486	6.79824	7.59149	5.84787	8.54186	0.00633602	4.97299e-06	747.373
229	6.96484																	255	7.20111	6.80514	7.59708	5.85431	8.54791	0.00615808	4.84502e-06	754.571
230	6.97744																	256	7.20718	6.81176	7.60261	5.86054	8.55382	0.00598498	4.72226e-06	761.775
231	6.9897																	257	7.21308	6.81811	7.60806	5.86658	8.55959	0.0058166	4.60599e-06	768.985
232	7.00162																	258	7.21882	6.82419	7.61344	5.87241	8.56522	0.00565283	4.48387e-06	776.201
233	7.01322																	259	7.22439	6.83002	7.61876	5.87806	8.57072	0.00549354	4.3702e-06	783.423
234	7.02451																	260	7.22981	6.83561	7.624	5.88353	8.57608	0.00533862	4.25588e-06	790.65
235	7.03548																	261	7.23507	6.84096	7.62918	5.88881	8.58132	0.00518796	4.14675e-06	797.883
236	7.04615																	262	7.24018	6.84607	7.63429	5.89393	8.58643	0.00504144	4.03958e-06	805.12
237	7.05653	7.03778																263	7.24515	6.85097	7.63933	5.89888	8.59143	0.00489896	3.93305e-06	812.363
238	7.06663																	264	7.24998	6.85566	7.6443	5.90367	8.5963	0.00476042	3.82977e-06	819.61
239	7.07644																	265	7.25467	6.86014	7.64921	5.9083	8.60105	0.0046257	3.72649e-06	826.863
240	7.08599																	266	7.25923	6.86442	7.65405	5.91278	8.60569	0.00449471	3.63166e-06	834.12
241	7.09527																	267	7.26367	6.86852	7.65881	5.91711	8.61022	0.00436735	3.53487e-06	841.381
242	7.10429																	268	7.26797	6.87243	7.66351	5.9213	8.61464	0.00424353	3.44134e-06	848.647
243	7.11307																	269	7.27215	6.87617	7.66814	5.92535	8.61896	0.00412314	3.3491e-06	855.917
244	7.1216																	270	7.27622	6.87973	7.6727	5.92927	8.62317	0.00400611	3.26011e-06	863.191
245	7.12989																	271	7.28017	6.88314	7.6772	5.93306	8.62728	0.00389233	3.17372e-06	870.47
246	7.13796																	272	7.284	6.88639	7.68162	5.93672	8.63129	0.00378172	3.08928e-06	877.752
247	7.14579																	273	7.28773	6.88949	7.68598	5.94026	8.6352	0.0036742	3.00549e-06	885.037
248	7.15341																	274	7.29135	6.89244	7.69026	5.94369	8.63902	0.00356969	2.92819e-06	892.327
249	7.16082																	275	7.29487	6.89526	7.69448	5.947	8.64274	0.0034681	2.84115e-06	899.62
250	7.16802																	276	7.29829	6.89795	7.69863	5.9502	8.64638	0.00336935	2.77035e-06	906.917
251	7.17502																	277	7.30161	6.90051	7.70271	5.95329	8.64993	0.00327337	2.69435e-06	914.217
252	7.18182																	278	7.30484	6.90295	7.70673	5.95629	8.65339	0.00318008	2.61965e-06	921.52
253	7.18844																	279	7.30797	6.90527	7.71067	5.95918	8.65677	0.00308941	2.5443e-06	928.826
254	7.19486																	280	7.31102	6.90748	7.71455	5.96198	8.66006	0.00300129	2.4813e-06	936.136
255	7.20111																	281	7.31398	6.90959	7.71836	5.96468	8.66327	0.00291565	2.41114e-06	943.448
256	7.20718																	282	7.31685	6.91159	7.72211	5.96729	8.66641	0.00283242	2.34294e-06	950.764
257	7.21308																	283	7.31964	6.9135	7.72579	5.96982	8.66947	0.00275153	2.28318e-06	958.082
258	7.21882																	284	7.32235	6.91531	7.7294	5.97226	8.67245	0.00267293	2.21628e-06	965.403
259	7.22439																	285	7.32499	6.91703	7.73295	5.97462	8.67536	0.00259654	2.16042e-06	972.727
260	7.22981																	286	7.32755	6.91867	7.73643	5.9769	8.6782	0.00252231	2.09936e-06	980.053
261	7.23507																	287	7.33003	6.92022	7.73984	5.9791	8.68097	0.00245017	2.037e-06	987.382
262	7.24018	7.03778																288	7.33245	6.9217	7.7432	5.98123	8.68367	0.00238008	1.98114e-06	994.713
263	7.24515																	289	7.33479	6.9231	7.74649	5.98329	8.6863	0.00231197	1.93047e-06	1002.05
264	7.24998																	290	7.33707	6.92443	7.74971	5.98528	8.68887	0.00224578	1.87396e-06	1009.38
265	7.25467																	291	7.33929	6.9257	7.75288	5.9872	8.69137	0.00218147	1.82395e-06	1016.72
266	7.25923																	292	7.34144	6.92689	7.75598	5.98906	8.69381	0.00211899	1.77328e-06	1024.06
267	7.26367																	293	7.34352	6.92803	7.75902	5.99086	8.69619	0.00205828	1.72457e-06	1031.4
268	7.26797																	294	7.34555	6.92911	7.762	5.99259	8.69851	0.00199929	1.67325e-06	1038.75
269	7.27215																	295	7.34752	6.93013	7.76492	5.99427	8.70078	0.00194197	1.62713e-06	1046.09
270	7.27622																	296	7.34944	6.93109	7.76778	5.99589	8.70298	0.00188629	1.58491e-06	1053.44
271	7.28017																	297	7.3513	6.932	7.77059	5.99746	8.70514	0.00183218	1.54009e-06	1060.79
272	7.284																	298	7.3531	6.93287	7.77334	5.99897	8.70723	0.00177962	1.49592e-06	1068.15
273	7.28773																	299	7.35486	6.93369	7.77603	6.00044	8.70928	0.00172855	1.455e-06	1075.5
274	7.29135																	300	7.35656	6.93446	7.77866	6.00185	8.71127	0.00167893	1.41148e-06	1082.86
275	7.29487																	301	7.35822	6.93519	7.78124	6.00322	8.71322	0.00163073	1.379e-06	1090.21
276	7.29829																	302	7.35982	6.93588	7.78377	6.00454	8.71511	0.0015839	1.33224e-06	1097.57
277	7.30161																	303	7.36138	6.93653	7.78624	6.00581	8.71696	0.00153841	1.29716e-06	1104.93
278	7.30484																	304	7.3629	6.93714	7.78866	6.00704	8.71875	0.00149422	1.26273e-06	1112.29
279	7.30797																	305	7.36437	6.93772	7.79102	6.00824	8.72051	0.00145128	1.22441e-06	1119.66
280	7.31102																	306	7.3658	6.93826	7.79334	6.00939	8.72222	0.00140957	1.18933e-06	1127.02
281	7.31398																	307	7.36719	6.93878	7.79561	6.0105	8.72388	0.00136905	1.15556e-06	1134.39
282	7.31685																	308	7.36854	6.93926	7.79782	6.01157	8.72551	0.00132969	1.12503e-06	1141.76
283	7.31964																	309	7.36985	6.93971	7.79999	6.01261	8.72709	0.00129146	1.0945e-06	1149.13
284	7.32235																	310	7.37112	6.94014	7.80211	6.01362	8.72863	0.00125432	1.06007e-06	1156.5
285	7.32499																	311	7.37236	6.94053	7.80419	6.01459	8.73013	0.00121823	1.03019e-06	1163.87
286	7.32755																	312	7.37356	6.94091	7.80621	6.01553	8.7316	0.00118319	1.00746e-06	1171.24
287	7.33003	7.03778																313	7.37473	6.94126	7.8082	6.01643	8.73302	0.00114914	9.74331e-07	1178.62
288	7.33245																	314	7.37586	6.94159	7.81013	6.01731	8.73441	0.00111607	9.47699e-07	1185.99
289	7.33479																	315	7.37696	6.94189	7.81203	6.01815	8.73577	0.00108395	9.19119e-07	1193.37
290	7.33707																	316	7.37803	6.94218	7.81388	6.01897	8.73709	0.00105274	8.93786e-07	1200.75
291	7.33929																	317	7.37907	6.94244	7.81569	6.01976	8.73837	0.00102243	8.69753e-07	1208.12
292	7.34144																	318	7.38007	6.94269	7.81745	6.02052	8.73962	0.00099299	8.46369e-07	1215.5
293	7.34352																	319	7.38105	6.94292	7.81918	6.02126	8.74084	0.000964393	8.21036e-07	1222.88
294	7.34555																	320	7.382	6.94314	7.82087	6.02197	8.74203	0.000936615	7.96353e-07	1230.27
295	7.34752																	321	7.38293	6.94333	7.82252	6.02266	8.74319	0.000909635	7.7232e-07	1237.65
296	7.34944																	322	7.38382	6.94352	7.82413	6.02333	8.74432	0.000883428	7.52833e-07	1245.03
297	7.3513																	323	7.38469	6.94368	7.8257	6.02397	8.74541	0.000857973	7.31398e-07	1252.42
298	7.3531																	324	7.38554	6.94384	7.82724	6.02459	8.74648	0.000833249	7.07364e-07	1259.8
299	7.35486																	325	7.38636	6.94398	7.82874	6.02519	8.74752	0.000809235	6.92425e-07	1267.19
300	7.35656																	326	7.38716	6.94411	7.8302	6.02577	8.74854	0.00078591	6.74887e-07	1274.57
301	7.35822																	327	7.38793	6.94423	7.83163	6.02634	8.74953	0.000763255	6.47605e-07	1281.96
302	7.35982																	328	7.38868	6.94434	7.83303	6.02688	8.75049	0.000741251	6.30717e-07	1289.35
303	7.36138																	329	7.38941	6.94444	7.83439	6.0274	8.75143	0.000719879	6.15777e-07	1296.74
304	7.3629																	330	7.39012	6.94452	7.83572	6.02791	8.75234	0.000699122	6.01487e-07	1304.13
305	7.36437																	331	7.39081	6.9446	7.83702	6.0284	8.75323	0.000678961	5.77454e-07	1311.52
306	7.3658																	332	7.39148	6.94467	7.83829	6.02887	8.75409	0.00065938	5.63813e-07	1318.91
307	7.36719																	333	7.39213	6.94474	7.83953	6.02933	8.75494	0.000640361	5.48873e-07	1326.3
308	7.36854																	334	7.39276	6.94479	7.84073	6.02977	8.75576	0.00062189	5.31985e-07	1333.69
309	7.36985																	335	7.39338	6.94484	7.84191	6.03019	8.75656	0.00060395	5.13148e-07	1341.09
310	7.37112																	336	7.39397	6.94488	7.84306	6.03061	8.75733	0.000586526	5.02755e-07	1348.48
311	7.37236																	337	7.39455	6.94491	7.84419	6.03101	8.75809	0.000569604	4.87815e-07	1355.88
312	7.37356	7.03778																338	7.39511	6.94494	7.84528	6.03139	8.75883	0.000553168	4.70927e-07	1363.27
313	7.37473																	339	7.39565	6.94496	7.84635	6.03176	8.75955	0.000537206	4.58585e-07	1370.67
314	7.37586																	340	7.39618	6.94497	7.84739	6.03212	8.76025	0.000521703	4.47543e-07	1378.06
315	7.37696																	341	7.3967	6.94499	7.84841	6.03247	8.76093	0.000506646	4.32603e-07	1385.46
316	7.37803																	342	7.3972	6.94499	7.8494	6.03281	8.76159	0.000492023	4.17014e-07	1392.85
317	7.37907																	343	7.39768	6.94499	7.85037	6.03313	8.76223	0.000477821	4.05322e-07	1400.25
318	7.38007																	344	7.39815	6.94499	7.85132	6.03344	8.76286	0.000464028	3.99476e-07	1407.65
319	7.38105																	345	7.39861	6.94499	7.85224	6.03375	8.76347	0.000450633	3.86485e-07	1415.05
320	7.382																	346	7.39905	6.94498	7.85313	6.03404	8.76407	0.000437623	3.71545e-07	1422.45
321	7.38293																	347	7.39949	6.94496	7.85401	6.03432	8.76465	0.000424988	3.6375e-07	1429.85
322	7.38382																	348	7.3999	6.94495	7.85486	6.0346	8.76521	0.000412717	3.52058e-07	1437.25
323	7.38469																	349	7.40031	6.94493	7.8557	6.03486	8.76576	0.0004008	3.44264e-07	1444.65
324	7.38554																	350	7.40071	6.9449	7.85651	6.03512	8.76629	0.000389227	3.33221e-07	1452.05
325	7.38636																	351	7.40109	6.94488	7.8573	6.03537	8.76681	0.000377987	3.24127e-07	1459.45
326	7.38716																	352	7.40146	6.94485	7.85807	6.0356	8.76732	0.000367071	3.16982e-07	1466.85
327	7.38793																	353	7.40182	6.94482	7.85883	6.03584	8.76781	0.00035647	3.02043e-07	1474.25
328	7.38868																	354	7.40218	6.94479	7.85956	6.03606	8.76829	0.000346174	2.98795e-07	1481.65
329	7.38941																	355	7.40252	6.94476	7.86028	6.03627	8.76876	0.000336175	2.89052e-07	1489.06
330	7.39012																	356	7.40285	6.94472	7.86098	6.03648	8.76921	0.000326465	2.79958e-07	1496.46
331	7.39081																	357	7.40317	6.94468	7.86166	6.03668	8.76966	0.000317035	2.72813e-07	1503.86
332	7.39148																	358	7.40348	6.94465	7.86232	6.03688	8.77009	0.000307877	2.65668e-07	1511.26
333	7.39213																	359	7.40379	6.94461	7.86297	6.03707	8.7705	0.000298983	2.54625e-07	1518.67
334	7.39276																	360	7.40408	6.94456	7.8636	6.03725	8.77091	0.000290345	2.50078e-07	1526.07
335	7.39338																	361	7.40437	6.94452	7.86421	6.03742	8.77131	0.000281957	2.42933e-07	1533.48
336	7.39397																	362	7.40464	6.94448	7.86481	6.03759	8.77169	0.000273811	2.35788e-07	1540.88
337	7.39455	7.03778																363	7.40491	6.94444	7.86539	6.03776	8.77207	0.0002659	2.31891e-07	1548.29
338	7.39511																	364	7.40518	6.94439	7.86596	6.03792	8.77244	0.000258217	2.20848e-07	1555.69
339	7.39565																	365	7.40543	6.94435	7.86652	6.03807	8.77279	0.000250756	2.15652e-07	1563.1
340	7.39618																	366	7.40568	6.9443	7.86706	6.03822	8.77314	0.00024351	2.07857e-07	1570.5
341	7.3967																	367	7.40592	6.94425	7.86758	6.03836	8.77347	0.000236473	2.0331e-07	1577.91
342	7.3972																	368	7.40615	6.94421	7.8681	6.0385	8.7738	0.00022964	1.96165e-07	1585.31
343	7.39768																	369	7.40638	6.94416	7.8686	6.03863	8.77412	0.000223004	1.93567e-07	1592.72
344	7.39815																	370	7.4066	6.94411	7.86908	6.03876	8.77443	0.000216559	1.87721e-07	1600.13
345	7.39861																	371	7.40681	6.94406	7.86956	6.03889	8.77473	0.0002103	1.79277e-07	1607.53
346	7.39905																	372	7.40702	6.94402	7.87002	6.03901	8.77503	0.000204223	1.7473e-07	1614.94
347	7.39949																	373	7.40722	6.94397	7.87047	6.03913	8.77531	0.00019832	1.67585e-07	1622.35
348	7.3999																	374	7.40741	6.94392	7.87091	6.03924	8.77559	0.000192588	1.64337e-07	1629.75
349	7.40031																	375	7.4076	6.94387	7.87134	6.03935	8.77586	0.000187022	1.6044e-07	1637.16
350	7.40071																	376	7.40779	6.94382	7.87175	6.03945	8.77612	0.000181616	1.54594e-07	1644.57
351	7.40109																	377	7.40797	6.94377	7.87216	6.03956	8.77638	0.000176367	1.52645e-07	1651.98
352	7.40146																	378	7.40814	6.94373	7.87256	6.03965	8.77663	0.000171269	1.50047e-07	1659.38
353	7.40182																	379	7.40831	6.94368	7.87294	6.03975	8.77687	0.000166318	1.43551e-07	1666.79
354	7.40218																	380	7.40847	6.94363	7.87332	6.03984	8.77711	0.00016151	1.38355e-07	1674.2
355	7.40252																	381	7.40863	6.94358	7.87368	6.03993	8.77734	0.000156842	1.3121e-07	1681.61
356	7.40285																	382	7.40879	6.94354	7.87404	6.04002	8.77756	0.000152308	1.33808e-07	1689.02
357	7.40317																	383	7.40894	6.94349	7.87439	6.0401	8.77778	0.000147905	1.26013e-07	1696.43
358	7.40348																	384	7.40908	6.94344	7.87473	6.04018	8.77799	0.000143629	1.24714e-07	1703.84
359	7.40379																	385	7.40923	6.9434	7.87505	6.04026	8.77819	0.000139477	1.21467e-07	1711.25
360	7.40408																	386	7.40936	6.94335	7.87538	6.04033	8.77839	0.000135444	1.18219e-07	1718.66
361	7.40437																	387	7.4095	6.9433	7.87569	6.04041	8.77859	0.000131529	1.11723e-07	1726.06
362	7.40464	7.03778																388	7.40963	6.94326	7.87599	6.04048	8.77878	0.000127726	1.09775e-07	1733.47
363	7.40491																	389	7.40975	6.94321	7.87629	6.04054	8.77896	0.000124033	1.05228e-07	1740.88
364	7.40518																	390	7.40987	6.94317	7.87658	6.04061	8.77914	0.000120447	1.03279e-07	1748.29
365	7.40543																	391	7.40999	6.94313	7.87686	6.04067	8.77931	0.000116965	9.74331e-08	1755.7
366	7.40568																	392	7.41011	6.94308	7.87713	6.04073	8.77948	0.000113583	9.6134e-08	1763.11
367	7.40592																	393	7.41022	6.94304	7.8774	6.04079	8.77965	0.000110299	9.67835e-08	1770.52
368	7.40615																	394	7.41033	6.943	7.87766	6.04085	8.77981	0.00010711	9.22367e-08	1777.93
369	7.40638																	395	7.41043	6.94296	7.87791	6.0409	8.77996	0.000104013	8.96385e-08	1785.34
370	7.4066																	396	7.41054	6.94291	7.87816	6.04096	8.78011	0.000101005	8.76898e-08	1792.75
371	7.40681																	397	7.41064	6.94287	7.8784	6.04101	8.78026	9.80847e-05	8.24934e-08	1800.17
372	7.40702																	398	7.41073	6.94283	7.87863	6.04106	8.78041	9.52485e-05	8.57411e-08	1807.58
373	7.40722																	399	7.41083	6.94279	7.87886	6.04111	8.78055	9.24943e-05	8.05447e-08	1814.99
374	7.40741																	400	7.41092	6.94275	7.87908	6.04115	8.78068	8.98197e-05	8.31429e-08	1822.4
375	7.4076																	401	7.41101	6.94271	7.8793	6.0412	8.78081	8.72225e-05	7.53483e-08	1829.81
376	7.40779																	402	7.41109	6.94268	7.87951	6.04124	8.78094	8.47003e-05	7.33996e-08	1837.22
377	7.40797																	403	7.41118	6.94264	7.87971	6.04128	8.78107	8.2251e-05	7.33996e-08	1844.63
378	7.40814																	404	7.41126	6.9426	7.87991	6.04133	8.78119	7.98725e-05	6.82032e-08	1852.04
379	7.40831																	405	7.41134	6.94256	7.88011	6.04136	8.78131	7.75628e-05	6.5605e-08	1859.45
380	7.40847																	406	7.41141	6.94253	7.8803	6.0414	8.78142	7.53198e-05	6.10581e-08	1866.86
381	7.40863																	407	7.41149	6.94249	7.88048	6.04144	8.78153	7.31417e-05	6.36563e-08	1874.28
382	7.40879																	408	7.41156	6.94246	7.88066	6.04147	8.78164	7.10265e-05	6.43058e-08	1881.69
383	7.40894																	409	7.41163	6.94242	7.88083	6.04151	8.78175	6.89725e-05	5.9759e-08	1889.1
384	7.40908																	410	7.4117	6.94239	7.881	6.04154	8.78185	6.69779e-05	5.78103e-08	1896.51
385	7.40923																	411	7.41176	6.94236	7.88117	6.04157	8.78195	6.50409e-05	5.65112e-08	1903.92
386	7.40936																	412	7.41183	6.94232	7.88133	6.0416	8.78205	6.316e-05	5.45625e-08	1911.33
387	7.4095	7.03778																413	7.41189	6.94229	7.88149	6.04163	8.78214	6.13334e-05	5.71608e-08	1918.75
388	7.40963																	414	7.41195	6.94226	7.88164	6.04166	8.78223	5.95596e-05	4.87166e-08	1926.16
389	7.40975																	415	7.41201	6.94223	7.88179	6.04169	8.78232	5.78371e-05	5.3913e-08	1933.57
390	7.40987																	416	7.41206	6.9422	7.88193	6.04172	8.78241	5.61645e-05	4.61183e-08	1940.98
391	7.40999																	417	7.41212	6.94217	7.88207	6.04174	8.7825	5.45401e-05	4.8067e-08	1948.39
392	7.41011																	418	7.41217	6.94214	7.88221	6.04177	8.78258	5.29628e-05	4.2221e-08	1955.81
393	7.41022																	419	7.41223	6.94211	7.88234	6.04179	8.78266	5.1431e-05	4.35201e-08	1963.22
394	7.41033																	420	7.41228	6.94208	7.88247	6.04182	8.78274	4.99436e-05	4.54688e-08	1970.63
395	7.41043																	421	7.41233	6.94205	7.8826	6.04184	8.78281	4.84991e-05	4.02723e-08	1978.04
396	7.41054																	422	7.41237	6.94202	7.88272	6.04186	8.78289	4.70964e-05	3.70246e-08	1985.46
397	7.41064																	423	7.41242	6.942	7.88284	6.04188	8.78296	4.57343e-05	4.09219e-08	1992.87
398	7.41073																	424	7.41246	6.94197	7.88296	6.0419	8.78303	4.44116e-05	4.09219e-08	2000.28
399	7.41083																	425	7.41251	6.94194	7.88307	6.04192	8.78309	4.31271e-05	3.6375e-08	2007.69
400	7.41092																	426	7.41255	6.94192	7.88318	6.04194	8.78316	4.18798e-05	3.50759e-08	2015.11
401	7.41101																	427	7.41259	6.94189	7.88329	6.04196	8.78322	4.06685e-05	3.6375e-08	2022.52
402	7.41109																	428	7.41263	6.94187	7.8834	6.04198	8.78329	3.94922e-05	3.31273e-08	2029.93
403	7.41118																	429	7.41267	6.94185	7.8835	6.042	8.78335	3.835e-05	3.24777e-08	2037.34
404	7.41126																	430	7.41271	6.94182	7.8836	6.04201	8.78341	3.72408e-05	3.18281e-08	2044.76
405	7.41134																	431	7.41275	6.9418	7.88369	6.04203	8.78346	3.61637e-05	3.31273e-08	2052.17
406	7.41141																	432	7.41278	6.94178	7.88379	6.04204	8.78352	3.51177e-05	2.79308e-08	2059.58
407	7.41149																	433	7.41282	6.94175	7.88388	6.04206	8.78357	3.4102e-05	2.98795e-08	2066.99
408	7.41156																	434	7.41285	6.94173	7.88397	6.04207	8.78363	3.31156e-05	2.59822e-08	2074.41
409	7.41163																	435	7.41288	6.94171	7.88406	6.04209	8.78368	3.21578e-05	2.79308e-08	2081.82
410	7.4117																	436	7.41291	6.94169	7.88414	6.0421	8.78373	3.12277e-05	2.79308e-08	2089.23
411	7.41176																	437	7.41294	6.94167	7.88422	6.04211	8.78378	3.03244e-05	2.46831e-08	2096.65
412	7.41183	7.03778																438	7.41297	6.94165	7.8843	6.04213	8.78382	2.94473e-05	2.66317e-08	2104.06
413	7.41189																	439	7.413	6.94163	7.88438	6.04214	8.78387	2.85956e-05	2.46831e-08	2111.47
414	7.41195																	440	7.41303	6.94161	7.88446	6.04215	8.78391	2.77685e-05	2.59822e-08	2118.88
415	7.41201																	441	7.41306	6.94159	7.88453	6.04216	8.78396	2.69653e-05	2.27344e-08	2126.3
416	7.41206																	442	7.41309	6.94157	7.8846	6.04217	8.784	2.61853e-05	2.20848e-08	2133.71
417	7.41212																	443	7.41311	6.94155	7.88467	6.04218	8.78404	2.54279e-05	2.33839e-08	2141.12
418	7.41217																	444	7.41314	6.94153	7.88474	6.04219	8.78408	2.46924e-05	2.14353e-08	2148.54
419	7.41223																	445	7.41316	6.94152	7.88481	6.0422	8.78412	2.39782e-05	2.07857e-08	2155.95
420	7.41228																	446	7.41318	6.9415	7.88487	6.04221	8.78416	2.32846e-05	1.94866e-08	2163.36
421	7.41233																	447	7.41321	6.94148	7.88493	6.04222	8.78419	2.26111e-05	2.01362e-08	2170.78
422	7.41237																	448	7.41323	6.94147	7.88499	6.04223	8.78423	2.19571e-05	1.62389e-08	2178.19
423	7.41242																	449	7.41325	6.94145	7.88505	6.04224	8.78426	2.1322e-05	1.88371e-08	2185.6
424	7.41246																	450	7.41327	6.94143	7.88511	6.04225	8.7843	2.07052e-05	1.81875e-08	2193.02
425	7.41251																	451	7.41329	6.94142	7.88517	6.04226	8.78433	2.01063e-05	1.81875e-08	2200.43
426	7.41255																	452	7.41331	6.9414	7.88522	6.04226	8.78436	1.95247e-05	1.81875e-08	2207.84
427	7.41259																	453	7.41333	6.94139	7.88528	6.04227	8.78439	1.896e-05	1.7538e-08	2215.26
428	7.41263																	454	7.41335	6.94137	7.88533	6.04228	8.78442	1.84116e-05	1.23415e-08	2222.67
429	7.41267																	455	7.41337	6.94136	7.88538	6.04229	8.78445	1.7879e-05	1.7538e-08	2230.08
430	7.41271																	456	7.41339	6.94135	7.88543	6.04229	8.78448	1.73618e-05	1.42902e-08	2237.5
431	7.41275																	457	7.4134	6.94133	7.88547	6.0423	8.78451	1.68596e-05	1.42902e-08	2244.91
432	7.41278																	458	7.41342	6.94132	7.88552	6.04231	8.78453	1.63719e-05	1.36406e-08	2252.32
433	7.41282																	459	7.41344	6.94131	7.88557	6.04231	8.78456	1.58984e-05	1.29911e-08	2259.74
434	7.41285																	460	7.41345	6.94129	7.88561	6.04232	8.78459	1.54385e-05	1.10424e-08	2267.15
435	7.41288																	461	7.41347	6.94128	7.88565	6.04232	8.78461	1.49919e-05	9.74331e-09	2274.56
436	7.41291																	462	7.41348	6.94127	7.8857	6.04233	8.78463	1.45583e-05	1.36406e-08	2281.98
437	7.41294	9.07611																463	7.4135	6.94126	7.88574	6.04233	8.78466	1.41371e-05	1.42902e-08	2289.39
438	7.41297																	464	7.41351	6.94125	7.88578	6.04234	8.78468	1.37282e-05	1.42902e-08	2296.8
439	7.413																	465	7.41352	6.94123	7.88581	6.04234	8.7847	1.33311e-05	9.74331e-09	2304.22
440	7.41303																	466	7.41354	6.94122	7.88585	6.04235	8.78472	1.29455e-05	1.29911e-08	2311.63
441	7.41306																	467	7.41355	6.94121	7.88589	6.04235	8.78475	1.2571e-05	1.29911e-08	2319.04
442	7.41309																	468	7.41356	6.9412	7.88592	6.04236	8.78477	1.22074e-05	8.4442e-09	2326.46
443	7.41311																	469	7.41357	6.94119	7.88596	6.04236	8.78479	1.18543e-05	1.1692e-08	2333.87
444	7.41314																	470	7.41359	6.94118	7.88599	6.04237	8.7848	1.15114e-05	5.84599e-09	2341.29
445	7.41316																	471	7.4136	6.94117	7.88602	6.04237	8.78482	1.11784e-05	1.03929e-08	2348.7
446	7.41318																	472	7.41361	6.94116	7.88606	6.04237	8.78484	1.0855e-05	1.23415e-08	2356.11
447	7.41321																	473	7.41362	6.94115	7.88609	6.04238	8.78486	1.0541e-05	1.03929e-08	2363.53
448	7.41323																	474	7.41363	6.94114	7.88612	6.04238	8.78488	1.02361e-05	1.29911e-08	2370.94
449	7.41325																	475	7.41364	6.94113	7.88615	6.04239	8.78489	9.94001e-06	1.10424e-08	2378.35
450	7.41327																	476	7.41365	6.94112	7.88617	6.04239	8.78491	9.65248e-06	7.14509e-09	2385.77
451	7.41329																	477	7.41366	6.94111	7.8862	6.04239	8.78493	9.37327e-06	6.49554e-09	2393.18
452	7.41331																	478	7.41367	6.94111	7.88623	6.0424	8.78494	9.10213e-06	7.79465e-09	2400.59
453	7.41333																	479	7.41368	6.9411	7.88626	6.0424	8.78496	8.83883e-06	7.79465e-09	2408.01
454	7.41335																	480	7.41369	6.94109	7.88628	6.0424	8.78497	8.58315e-06	5.84599e-09	2415.42
455	7.41337																	481	7.41369	6.94108	7.88631	6.0424	8.78498	8.33487e-06	7.79465e-09	2422.84
456	7.41339																	482	7.4137	6.94107	7.88633	6.04241	8.785	8.09376e-06	9.09376e-09	2430.25
457	7.4134																	483	7.41371	6.94107	7.88635	6.04241	8.78501	7.85964e-06	5.19643e-09	2437.66
458	7.41342																	484	7.41372	6.94106	7.88638	6.04241	8.78502	7.63228e-06	5.19643e-09	2445.08
459	7.41344																	485	7.41373	6.94105	7.8864	6.04241	8.78504	7.4115e-06	6.49554e-09	2452.49
460	7.41345																	486	7.41373	6.94104	7.88642	6.04242	8.78505	7.19711e-06	3.24777e-09	2459.9
461	7.41347																	487	7.41374	6.94104	7.88644	6.04242	8.78506	6.98892e-06	5.19643e-09	2467.32
462	7.41348																	488	7.41375	6.94103	7.88646	6.04242	8.78507	6.78675e-06	8.4442e-09	2474.73
463	7.4135																	489	7.41375	6.94102	7.88648	6.04242	8.78508	6.59042e-06	5.19643e-09	2482.15
464	7.41351																	490	7.41376	6.94102	7.8865	6.04243	8.78509	6.39978e-06	3.89732e-09	2489.56
465	7.41352																	491	7.41377	6.94101	7.88652	6.04243	8.78511	6.21465e-06	3.24777e-09	2496.97
466	7.41354																	492	7.41377	6.94101	7.88654	6.04243	8.78512	6.03488e-06	7.14509e-09	2504.39
467	7.41355																	493	7.41378	6.941	7.88656	6.04243	8.78513	5.86031e-06	6.49554e-09	2511.8
468	7.41356																	494	7.41378	6.94099	7.88657	6.04243	8.78514	5.69079e-06	7.14509e-09	2519.21
469	7.41357																	495	7.41379	6.94099	7.88659	6.04243	8.78515	5.52617e-06	4.54688e-09	2526.63
470	7.41359																	496	7.4138	6.94098	7.88661	6.04244	8.78515	5.36631e-06	7.79465e-09	2534.04
471	7.4136																	497	7.4138	6.94098	7.88662	6.04244	8.78516	5.21108e-06	4.54688e-09	2541.46
472	7.41361																	498	7.41381	6.94097	7.88664	6.04244	8.78517	5.06033e-06	1.94866e-09	2548.87
473	7.41362																	499	7.41381	6.94097	7.88665	6.04244	8.78518	4.91395e-06	4.54688e-09	2556.28
474	7.41363																	500	7.41382	6.94096	7.88667	6.04244	8.78519	4.7718e-06	5.19643e-09	2563.7
475	7.41364
476	7.41365
477	7.41366
478	7.41367
479	7.41368
480	7.41369
481	7.41369
482	7.4137
483	7.41371
484	7.41372
485	7.41373
486	7.41373
487	7.41374
488	7.41375
489	7.41375
490	7.41376
491	7.41377
492	7.41377
493	7.41378
494	7.41378
495	7.41379
496	7.4138
497	7.4138
498	7.41381
499	7.41381
500	7.41382

## Sheet: Gompertz 4
T4
Gompertz M(a,b,c)	Parameters	Std Error	T Value	95% Conf Lim	95% Conf Lim	X Observed	Y Observed	Y Predicted	Y Residual	Y Residual%	95% Conf Lim	95% Conf Lim	95% Pred Lim	95% Pred Lim	First Deriv	Second Deriv	Area	X Generated	Y Predicted	95% Conf Lim	95% Conf Lim	95% Pred Lim	95% Pred Lim	First Deriv	Second Deriv	Area
8001	6.41748	0.145262	44.1787	6.11229	6.72266	0	0	0.0012185	-0.0012185	0	-0.00570955	0.00814656	-0.823507	0.825944	0.000232645	5.62711e-06	0	0	0.0012185	-0.00570955	0.00814656	-0.823507	0.825944	0.000232645	5.62711e-06	0
0.981243	0.052607	0.00647121	8.12939	0.0390115	0.0662025	4	0	0.00253017	-0.00253017	0	-0.0101635	0.0152238	-0.822264	0.827325	0.000441887	8.53915e-06	0.0072194	1	0.00147173	-0.00663921	0.00958268	-0.823265	0.826208	0.000274801	6.28746e-06	0.0013416
0.977932	51.532	7.90836	6.51614	34.9172	68.1469	8	0	0.00493647	-0.00493647	0	-0.0168909	0.0267638	-0.820049	0.829922	0.000788628	1.20975e-05	0.0216916	2	0.0017702	-0.00768552	0.0112259	-0.822981	0.826521	0.000323249	6.99366e-06	0.00295854
0.39254						12	0	0.00909772	-0.00909772	0	-0.0263129	0.0445083	-0.816359	0.834554	0.00132948	1.6065e-05	0.0490403	3	0.00212056	-0.00885736	0.0130985	-0.822649	0.82689	0.000378694	7.74475e-06	0.0048993
470.811						36.9306	1.11111	0.148911	0.9622	86.598	-0.104698	0.402521	-0.7139	1.01172	0.0124865	2.40081e-05	1.44606	4	0.00253017	-0.0101635	0.0152238	-0.822264	0.827325	0.000441887	8.53915e-06	0.0072194
						61.9306	1.11111	0.742968	0.368143	33.1328	0.22505	1.26089	-0.230871	1.71681	0.0356922	-1.45204e-05	11.3636	5	0.00300718	-0.0116123	0.0176266	-0.821819	0.827834	0.000513623	9.37472e-06	0.0099821
						86.9306	1.11111	1.86591	-0.754796	-67.9316	1.34948	2.38234	0.892858	2.83896	0.0513551	-3.00802e-05	43.1504	6	0.00356054	-0.0132117	0.0203328	-0.821307	0.828428	0.000594737	1.02487e-05	0.0132592
						111.931	3.33333	3.16235	0.170983	5.12949	2.72248	3.60223	2.22768	4.09702	0.0498648	-1.54048e-05	106.09	7	0.00420007	-0.0149691	0.0233692	-0.820719	0.82912	0.000686102	1.11576e-05	0.0171319
						136.931	4.44444	4.27835	0.166094	3.73711	3.83759	4.71911	3.34326	5.21344	0.0386501	-9.98888e-07	199.69	8	0.00493647	-0.0168909	0.0267638	-0.820049	0.829922	0.000788628	1.20975e-05	0.0216916
						161.931	4.44444	5.08722	-0.64278	-14.4625	4.67508	5.49936	4.16528	6.00917	0.0263297	4.66624e-06	317.405	9	0.00578136	-0.0189826	0.0305453	-0.819287	0.83085	0.000903253	1.30636e-05	0.027041
						186.931	6.29667	5.61781	0.678861	10.7813	5.27457	5.96104	4.72453	6.51108	0.016658	5.11402e-06	451.722	10	0.00674733	-0.0212484	0.0347431	-0.818424	0.831919	0.00103094	1.40508e-05	0.0332947
						211.931	6.29667	5.94636	0.350306	5.56336	5.66837	6.22435	5.07607	6.81665	0.0101018	3.89482e-06	596.614	11	0.00784793	-0.0236915	0.0393873	-0.817452	0.833148	0.00117269	1.50534e-05	0.0405805
						236.931	6.29667	6.14318	0.153485	2.43756	5.89817	6.3882	5.28286	7.00351	0.00597901	2.58203e-06	747.948	12	0.00909772	-0.0263129	0.0445083	-0.816359	0.834554	0.00132948	1.6065e-05	0.0490403
						261.931	6.29667	6.25887	0.0378012	0.600336	6.01595	6.50178	5.39914	7.11859	0.00348997	1.60524e-06	903.102	13	0.0105123	-0.0291123	0.0501368	-0.815136	0.83616	0.00150235	1.70788e-05	0.0588309
						286.931	6.29667	6.32612	-0.0294547	-0.467783	6.0711	6.58115	5.46289	7.18935	0.00202094	9.59895e-07	1060.49	14	0.0121081	-0.0320873	0.0563035	-0.813772	0.837988	0.00169229	1.80879e-05	0.0701252
						311.931	6.29667	6.36498	-0.0683118	-1.08489	6.09575	6.6342	5.49745	7.23251	0.00116494	5.62159e-07	1219.17	15	0.0139029	-0.0352334	0.0630391	-0.812256	0.840062	0.00190031	1.90847e-05	0.0831134
						336.931	6.29667	6.38735	-0.0906811	-1.44014	6.10641	6.66829	5.51611	7.25858	0.000669759	3.26897e-07	1378.6	16	0.0159151	-0.0385436	0.0703738	-0.810578	0.842408	0.00212742	2.00616e-05	0.0980034
						361.931	6.29667	6.4002	-0.103532	-1.64424	6.11079	6.68961	5.52619	7.2742	0.000384487	1.8782e-07	1538.46	17	0.0181644	-0.0420087	0.0783375	-0.808725	0.845053	0.00237459	2.10107e-05	0.115023
						386.931	6.29667	6.40757	-0.110906	-1.76135	6.11242	6.70273	5.53165	7.2835	0.000220532	1.09182e-07	1698.57	18	0.0206713	-0.0456168	0.0869594	-0.806685	0.848028	0.00264277	2.19239e-05	0.134418
						411.931	6.29667	6.4118	-0.115135	-1.82851	6.1129	6.7107	5.53461	7.28899	0.00012643	6.174e-08	1858.82	19	0.0234572	-0.0493532	0.0962676	-0.804447	0.851362	0.00293287	2.27936e-05	0.156458
						436.931	6.29667	6.41423	-0.117559	-1.867	6.11294	6.71552	5.53622	7.29223	7.24609e-05	3.57442e-08	2019.14	20	0.0265446	-0.0532004	0.10629	-0.801999	0.855088	0.00324575	2.36113e-05	0.181433
																		21	0.0299566	-0.057138	0.117051	-0.799326	0.85924	0.00358225	2.43702e-05	0.209656
																		22	0.0337172	-0.0611428	0.128577	-0.796417	0.863852	0.0039431	2.5062e-05	0.241462
																		23	0.0378512	-0.0651883	0.140891	-0.793258	0.86896	0.00432902	2.56801e-05	0.277214
																		24	0.0423838	-0.0692452	0.154013	-0.789834	0.874601	0.00474061	2.62178e-05	0.317298
X Generated	Y Predicted	Y Observed																25	0.0473411	-0.0732812	0.167963	-0.78613	0.880812	0.0051784	2.66686e-05	0.362124
0	0.0012185	0																26	0.0527495	-0.0772611	0.18276	-0.782132	0.887631	0.00564286	2.7027e-05	0.41213
1	0.00147173																	27	0.0586359	-0.0811468	0.198419	-0.777823	0.895095	0.00613434	2.72879e-05	0.467782
2	0.0017702																	28	0.0650273	-0.0848975	0.214952	-0.773186	0.903241	0.0066531	2.74471e-05	0.52957
3	0.00212056																	29	0.0719512	-0.0884697	0.232372	-0.768203	0.912106	0.00719929	2.7501e-05	0.598014
4	0.00253017	0																30	0.079435	-0.0918176	0.250688	-0.762855	0.921725	0.00777298	2.74463e-05	0.673659
5	0.00300718																	31	0.0875063	-0.094893	0.269906	-0.75712	0.932133	0.0083741	2.72808e-05	0.75708
6	0.00356054																	32	0.0961923	-0.0976459	0.290031	-0.750978	0.943363	0.0090025	2.70039e-05	0.848877
7	0.00420007																	33	0.10552	-0.100024	0.311065	-0.744405	0.955446	0.00965789	2.66142e-05	0.949679
8	0.00493647	0																34	0.115517	-0.101974	0.333008	-0.737376	0.96841	0.0103399	2.61123e-05	1.06014
9	0.00578136																	35	0.126209	-0.103441	0.355859	-0.729866	0.982283	0.011048	2.5499e-05	1.18094
10	0.00674733																	36	0.137621	-0.104369	0.379612	-0.721846	0.997089	0.0117816	2.47765e-05	1.3128
11	0.00784793																	37	0.14978	-0.104701	0.404261	-0.713287	1.01285	0.0125399	2.3947e-05	1.45644
12	0.00909772	0																38	0.162709	-0.10438	0.429799	-0.70416	1.02958	0.0133222	2.3014e-05	1.61262
13	0.0105123																	39	0.176432	-0.103349	0.456214	-0.694431	1.0473	0.0141275	2.19809e-05	1.78212
14	0.0121081																	40	0.190972	-0.101551	0.483494	-0.684068	1.06601	0.0149548	2.08525e-05	1.96575
15	0.0139029																	41	0.206349	-0.0989289	0.511626	-0.673037	1.08573	0.0158029	1.96344e-05	2.16434
16	0.0159151																	42	0.222584	-0.0954269	0.540595	-0.661303	1.10647	0.0166707	1.83318e-05	2.37874
17	0.0181644																	43	0.239696	-0.0909903	0.570383	-0.64883	1.12822	0.0175567	1.69505e-05	2.6098
18	0.0206713																	44	0.257703	-0.0855657	0.600972	-0.635582	1.15099	0.0184597	1.54976e-05	2.85843
19	0.0234572																	45	0.276621	-0.0791013	0.632343	-0.621523	1.17477	0.0193782	1.39796e-05	3.12551
20	0.0265446																	46	0.296464	-0.0715474	0.664476	-0.606618	1.19955	0.0203107	1.24036e-05	3.41198
21	0.0299566																	47	0.317246	-0.0628563	0.697349	-0.59083	1.22532	0.0212556	1.07772e-05	3.71875
22	0.0337172																	48	0.338979	-0.0529831	0.730941	-0.574125	1.25208	0.0222113	9.10762e-06	4.04679
23	0.0378512																	49	0.361672	-0.0418852	0.765229	-0.556469	1.27981	0.023176	7.40336e-06	4.39703
24	0.0423838																	50	0.385334	-0.0295231	0.80019	-0.53783	1.3085	0.0241482	5.67102e-06	4.77045
25	0.0473411																	51	0.40997	-0.0158605	0.835801	-0.518177	1.33812	0.025126	3.91996e-06	5.16802
26	0.0527495																	52	0.435587	-0.000864166	0.872038	-0.49748	1.36865	0.0261078	2.15603e-06	5.59072
27	0.0586359																	53	0.462187	0.0154955	0.908878	-0.475714	1.40009	0.0270917	3.86525e-07	6.03953
28	0.0650273																	54	0.48977	0.0332445	0.946296	-0.452854	1.43239	0.028076	-1.37969e-06	6.51542
29	0.0719512																	55	0.518338	0.0524054	0.984271	-0.428878	1.46555	0.0290589	-3.13639e-06	7.01939
30	0.079435																	56	0.547887	0.0729967	1.02278	-0.403767	1.49954	0.0300387	-4.87697e-06	7.55243
31	0.0875063																	57	0.578414	0.0950332	1.06179	-0.377505	1.53433	0.0310136	-6.59351e-06	8.11549
32	0.0961923																	58	0.609912	0.118526	1.1013	-0.35008	1.5699	0.0319819	-8.28169e-06	8.70958
33	0.10552																	59	0.642375	0.143481	1.14127	-0.321482	1.60623	0.0329419	-9.9334e-06	9.33564
34	0.115517																	60	0.675793	0.169903	1.18168	-0.291704	1.64329	0.033892	-1.15439e-05	9.99464
35	0.126209																	61	0.710155	0.197789	1.22252	-0.260744	1.68105	0.0348306	-1.31094e-05	10.6875
36	0.137621																	62	0.745449	0.227135	1.26376	-0.228601	1.7195	0.035756	-1.46235e-05	11.4153
37	0.14978	1.11111																63	0.781662	0.257933	1.30539	-0.195281	1.7586	0.0366669	-1.60833e-05	12.1787
38	0.162709																	64	0.818778	0.290169	1.34739	-0.160789	1.79834	0.0375616	-1.74826e-05	12.9789
39	0.176432																	65	0.856779	0.323829	1.38973	-0.125138	1.8387	0.0384389	-1.88189e-05	13.8166
40	0.190972																	66	0.895649	0.35889	1.43241	-0.0883401	1.87964	0.0392974	-2.00908e-05	14.6927
41	0.206349																	67	0.935368	0.395332	1.4754	-0.0504132	1.92115	0.0401358	-2.12918e-05	15.6082
42	0.222584																	68	0.975914	0.433125	1.5187	-0.0113775	1.9632	0.0409529	-2.24243e-05	16.5637
43	0.239696																	69	1.01727	0.472242	1.56229	0.0287437	2.00579	0.0417475	-2.34818e-05	17.5603
44	0.257703																	70	1.0594	0.512648	1.60615	0.0699245	2.04888	0.0425187	-2.44672e-05	18.5985
45	0.276621																	71	1.1023	0.554308	1.65028	0.112136	2.09245	0.0432655	-2.53779e-05	19.6793
46	0.296464																	72	1.14592	0.597182	1.69466	0.155347	2.1365	0.0439868	-2.62114e-05	20.8034
47	0.317246																	73	1.19026	0.64123	1.73929	0.199524	2.181	0.044682	-2.69675e-05	21.9714
48	0.338979																	74	1.23528	0.686408	1.78415	0.24463	2.22593	0.0453502	-2.76494e-05	23.1841
49	0.361672																	75	1.28095	0.732669	1.82923	0.290629	2.27127	0.0459908	-2.82551e-05	24.4422
50	0.385334																	76	1.32725	0.779965	1.87454	0.33748	2.31702	0.0466031	-2.87858e-05	25.7462
51	0.40997																	77	1.37415	0.828247	1.92005	0.385142	2.36315	0.0471866	-2.92415e-05	27.0969
52	0.435587																	78	1.42161	0.877462	1.96577	0.433572	2.40966	0.0477409	-2.96233e-05	28.4947
53	0.462187																	79	1.46962	0.927558	2.01168	0.482728	2.45651	0.0482656	-2.99356e-05	29.9403
54	0.48977																	80	1.51814	0.97848	2.05779	0.532563	2.50371	0.0487603	-3.01741e-05	31.4341
55	0.518338																	81	1.56713	1.03017	2.10409	0.583032	2.55123	0.0492249	-3.0348e-05	32.9767
56	0.547887																	82	1.61657	1.08258	2.15057	0.63409	2.59906	0.0496592	-3.04539e-05	34.5685
57	0.578414																	83	1.66644	1.13564	2.19723	0.685689	2.64719	0.0500629	-3.04932e-05	36.21
58	0.609912																	84	1.71669	1.18931	2.24408	0.737784	2.6956	0.0504362	-3.04737e-05	37.9015
59	0.642375																	85	1.7673	1.24351	2.29109	0.790326	2.74428	0.0507791	-3.03948e-05	39.6435
60	0.675793																	86	1.81824	1.2982	2.33828	0.84327	2.79321	0.0510915	-3.02571e-05	41.4363
61	0.710155																	87	1.86947	1.35332	2.38563	0.89657	2.84238	0.0513737	-3.00656e-05	43.2801
62	0.745449	1.11111																88	1.92098	1.4088	2.43315	0.95018	2.89177	0.0516258	-2.98237e-05	45.1753
63	0.781662																	89	1.97272	1.4646	2.48083	1.00405	2.94138	0.0518481	-2.95312e-05	47.1221
64	0.818778																	90	2.02466	1.52066	2.52867	1.05815	2.99118	0.0520409	-2.91929e-05	49.1208
65	0.856779																	91	2.07679	1.57691	2.57666	1.11242	3.04115	0.0522045	-2.88128e-05	51.1715
66	0.895649																	92	2.12906	1.63332	2.62481	1.16683	3.09129	0.0523393	-2.83916e-05	53.2744
67	0.935368																	93	2.18146	1.68982	2.6731	1.22133	3.14158	0.0524457	-2.79302e-05	55.4297
68	0.975914																	94	2.23394	1.74636	2.72153	1.27589	3.192	0.0525242	-2.74356e-05	57.6374
69	1.01727																	95	2.2865	1.8029	2.7701	1.33047	3.24253	0.0525752	-2.69092e-05	59.8976
70	1.0594																	96	2.33909	1.85938	2.81879	1.38502	3.29315	0.0525993	-2.63523e-05	62.2104
71	1.1023																	97	2.39169	1.91577	2.8676	1.43952	3.34385	0.0525971	-2.57667e-05	64.5758
72	1.14592																	98	2.44427	1.97201	2.91653	1.49393	3.39461	0.0525691	-2.516e-05	66.9937
73	1.19026																	99	2.49682	2.02807	2.96556	1.54821	3.44542	0.052516	-2.453e-05	69.4643
74	1.23528																	100	2.54929	2.08391	3.01468	1.60235	3.49624	0.0524383	-2.38804e-05	71.9873
75	1.28095																	101	2.60168	2.1395	3.06387	1.6563	3.54706	0.0523368	-2.32139e-05	74.5628
76	1.32725																	102	2.65396	2.19479	3.11314	1.71005	3.59787	0.052212	-2.25328e-05	77.1907
77	1.37415																	103	2.7061	2.24975	3.16245	1.76356	3.64864	0.0520647	-2.184e-05	79.8707
78	1.42161																	104	2.75808	2.30437	3.2118	1.81682	3.69935	0.0518956	-2.1132e-05	82.6028
79	1.46962																	105	2.80988	2.3586	3.26117	1.86979	3.74998	0.0517053	-2.042e-05	85.3868
80	1.51814																	106	2.86149	2.41244	3.31054	1.92246	3.80051	0.0514946	-1.97016e-05	88.2225
81	1.56713																	107	2.91287	2.46585	3.35989	1.97481	3.85092	0.0512642	-1.89782e-05	91.1097
82	1.61657																	108	2.96401	2.51882	3.4092	2.02682	3.90119	0.0510149	-1.82539e-05	94.0482
83	1.66644																	109	3.01489	2.57133	3.45845	2.07848	3.9513	0.0507473	-1.75254e-05	97.0377
84	1.71669																	110	3.0655	2.62338	3.50762	2.12976	4.00123	0.0504621	-1.67982e-05	100.078
85	1.7673																	111	3.11581	2.67494	3.55668	2.18067	4.05095	0.0501602	-1.60742e-05	103.169
86	1.81824																	112	3.16581	2.72601	3.60562	2.23117	4.10045	0.0498422	-1.53564e-05	106.309
87	1.86947	1.11111																113	3.21549	2.77657	3.6544	2.28127	4.14971	0.0495088	-1.46373e-05	109.5
88	1.92098																	114	3.26483	2.82664	3.70301	2.33094	4.19871	0.0491608	-1.39289e-05	112.74
89	1.97272																	115	3.31381	2.87619	3.75142	2.38019	4.24742	0.0487989	-1.3226e-05	116.03
90	2.02466																	116	3.36242	2.92523	3.79961	2.42901	4.29583	0.0484237	-1.25296e-05	119.368
91	2.07679																	117	3.41065	2.97376	3.84754	2.47738	4.34392	0.048036	-1.18476e-05	122.754
92	2.12906																	118	3.45849	3.02177	3.8952	2.52529	4.39168	0.0476365	-1.1172e-05	126.189
93	2.18146																	119	3.50592	3.06927	3.94257	2.57276	4.43908	0.0472258	-1.05088e-05	129.671
94	2.23394																	120	3.55293	3.11625	3.98962	2.61976	4.48611	0.0468046	-9.85598e-06	133.201
95	2.2865																	121	3.59952	3.16273	4.03632	2.6663	4.53275	0.0463735	-9.21551e-06	136.777
96	2.33909																	122	3.64568	3.2087	4.08266	2.71236	4.57899	0.0459332	-8.59031e-06	140.4
97	2.39169																	123	3.69139	3.25417	4.12861	2.75796	4.62482	0.0454843	-7.97551e-06	144.068
98	2.44427																	124	3.73664	3.29913	4.17416	2.80308	4.67021	0.0450274	-7.37598e-06	147.782
99	2.49682																	125	3.78144	3.3436	4.21928	2.84772	4.71516	0.0445632	-6.7901e-06	151.541
100	2.54929																	126	3.82577	3.38758	4.26395	2.89189	4.75965	0.0440922	-6.22112e-06	155.345
101	2.60168																	127	3.86962	3.43108	4.30817	2.93557	4.80367	0.0436149	-5.66383e-06	159.193
102	2.65396																	128	3.913	3.47409	4.3519	2.97878	4.84721	0.043132	-5.12604e-06	163.084
103	2.7061																	129	3.95588	3.51663	4.39514	3.0215	4.89027	0.0426439	-4.60418e-06	167.018
104	2.75808																	130	3.99828	3.55869	4.43788	3.06374	4.93282	0.0421513	-4.09239e-06	170.996
105	2.80988																	131	4.04019	3.60028	4.48009	3.1055	4.97487	0.0416545	-3.59717e-06	175.015
106	2.86149																	132	4.08159	3.64142	4.52177	3.14678	5.01641	0.0411542	-3.12339e-06	179.076
107	2.91287																	133	4.12249	3.68209	4.5629	3.18757	5.05742	0.0406507	-2.66002e-06	183.178
108	2.96401																	134	4.16289	3.72231	4.60347	3.22788	5.0979	0.0401445	-2.21419e-06	187.321
109	3.01489																	135	4.20278	3.76208	4.64349	3.26772	5.13785	0.0396362	-1.78461e-06	191.503
110	3.0655																	136	4.24216	3.8014	4.68293	3.30707	5.17726	0.0391261	-1.37128e-06	195.726
111	3.11581																	137	4.28103	3.84028	4.72179	3.34595	5.21612	0.0386146	-9.68343e-07	199.988
112	3.16581	3.33333																138	4.31939	3.87872	4.76006	3.38434	5.25444	0.0381021	-5.85555e-07	204.288
113	3.21549																	139	4.35724	3.91673	4.79775	3.42226	5.29221	0.037589	-2.17715e-07	208.626
114	3.26483																	140	4.39457	3.9543	4.83484	3.45971	5.32943	0.0370757	1.36478e-07	213.002
115	3.31381																	141	4.43139	3.99145	4.87133	3.49668	5.36609	0.0365626	4.77673e-07	217.415
116	3.36242																	142	4.46769	4.02817	4.90722	3.53319	5.4022	0.0360499	8.0002e-07	221.865
117	3.41065																	143	4.50349	4.06447	4.94251	3.56922	5.43776	0.035538	1.10937e-06	226.35
118	3.45849																	144	4.53877	4.10035	4.9772	3.60478	5.47276	0.0350272	1.40442e-06	230.872
119	3.50592																	145	4.57354	4.13581	5.01128	3.63988	5.50721	0.0345179	1.68908e-06	235.428
120	3.55293																	146	4.60781	4.17086	5.04476	3.67451	5.54111	0.0340102	1.95813e-06	240.019
121	3.59952																	147	4.64156	4.20549	5.07764	3.70868	5.57445	0.0335045	2.21289e-06	244.643
122	3.64568																	148	4.67482	4.23972	5.10991	3.74238	5.60725	0.033001	2.4566e-06	249.301
123	3.69139																	149	4.70757	4.27354	5.1416	3.77563	5.6395	0.0324999	2.68796e-06	253.993
124	3.73664																	150	4.73982	4.30695	5.17268	3.80842	5.67121	0.0320016	2.90308e-06	258.716
125	3.78144																	151	4.77157	4.33997	5.20318	3.84076	5.70238	0.0315061	3.1078e-06	263.472
126	3.82577																	152	4.80283	4.37258	5.23309	3.87265	5.73302	0.0310137	3.30406e-06	268.259
127	3.86962																	153	4.8336	4.40479	5.26241	3.90408	5.76312	0.0305247	3.48409e-06	273.078
128	3.913																	154	4.86388	4.43661	5.29116	3.93507	5.79269	0.0300391	3.65826e-06	277.926
129	3.95588																	155	4.89368	4.46803	5.31933	3.96561	5.82175	0.0295572	3.81943e-06	282.805
130	3.99828																	156	4.923	4.49905	5.34694	3.99571	5.85028	0.0290791	3.96631e-06	287.714
131	4.04019																	157	4.95184	4.52969	5.37399	4.02538	5.8783	0.028605	4.11188e-06	292.651
132	4.08159																	158	4.98021	4.55994	5.40048	4.0546	5.90582	0.0281349	4.23991e-06	297.617
133	4.12249																	159	5.00811	4.5898	5.42643	4.08339	5.93283	0.0276692	4.36209e-06	302.611
134	4.16289																	160	5.03555	4.61927	5.45183	4.11174	5.95935	0.0272077	4.47583e-06	307.633
135	4.20278																	161	5.06253	4.64836	5.4767	4.13967	5.98538	0.0267508	4.57916e-06	312.682
136	4.24216																	162	5.08905	4.67707	5.50104	4.16717	6.01093	0.0262984	4.67339e-06	317.758
137	4.28103	4.44444																163	5.11513	4.70539	5.52486	4.19425	6.036	0.0258507	4.76178e-06	322.86
138	4.31939																	164	5.14075	4.73334	5.54817	4.22091	6.0606	0.0254078	4.84302e-06	327.988
139	4.35724																	165	5.16594	4.76091	5.57097	4.24715	6.08473	0.0249697	4.9093e-06	333.142
140	4.39457																	166	5.1907	4.78811	5.59328	4.27298	6.10841	0.0245365	4.97559e-06	338.32
141	4.43139																	167	5.21502	4.81493	5.61511	4.2984	6.13164	0.0241083	5.03473e-06	343.523
142	4.46769																	168	5.23891	4.84138	5.63645	4.3234	6.15442	0.0236851	5.08478e-06	348.75
143	4.50349																	169	5.26239	4.86746	5.65732	4.34801	6.17677	0.023267	5.13027e-06	354.001
144	4.53877																	170	5.28545	4.89318	5.67772	4.37221	6.19869	0.0228541	5.16796e-06	359.275
145	4.57354																	171	5.3081	4.91852	5.69768	4.39602	6.22018	0.0224463	5.20046e-06	364.571
146	4.60781																	172	5.33034	4.94351	5.71718	4.41943	6.24126	0.0220437	5.2271e-06	369.891
147	4.64156																	173	5.35219	4.96813	5.73625	4.44245	6.26193	0.0216463	5.24855e-06	375.232
148	4.67482																	174	5.37364	4.99239	5.75489	4.46508	6.2822	0.0212542	5.26285e-06	380.595
149	4.70757																	175	5.3947	5.01629	5.77311	4.48733	6.30207	0.0208673	5.27845e-06	385.979
150	4.73982																	176	5.41537	5.03984	5.79091	4.5092	6.32155	0.0204858	5.28364e-06	391.384
151	4.77157																	177	5.43567	5.06303	5.80831	4.53069	6.34065	0.0201095	5.28299e-06	396.81
152	4.80283																	178	5.4556	5.08587	5.82532	4.55181	6.35938	0.0197384	5.28559e-06	402.255
153	4.8336																	179	5.47515	5.10836	5.84194	4.57257	6.37774	0.0193727	5.28039e-06	407.721
154	4.86388																	180	5.49434	5.1305	5.85818	4.59295	6.39573	0.0190123	5.26675e-06	413.206
155	4.89368																	181	5.51318	5.1523	5.87405	4.61298	6.41338	0.0186571	5.2557e-06	418.709
156	4.923																	182	5.53166	5.17375	5.88956	4.63265	6.43067	0.0183071	5.2375e-06	424.232
157	4.95184																	183	5.54979	5.19486	5.90472	4.65196	6.44762	0.0179624	5.21671e-06	429.772
158	4.98021																	184	5.56759	5.21564	5.91954	4.67093	6.46424	0.017623	5.19721e-06	435.331
159	5.00811																	185	5.58504	5.23607	5.93401	4.68955	6.48053	0.0172887	5.17121e-06	440.908
160	5.03555																	186	5.60216	5.25617	5.94816	4.70783	6.4965	0.0169596	5.14262e-06	446.501
161	5.06253																	187	5.61896	5.27594	5.96199	4.72577	6.51215	0.0166356	5.11532e-06	452.112
162	5.08905	4.44444																188	5.63544	5.29537	5.9755	4.74338	6.5275	0.0163168	5.07763e-06	457.739
163	5.11513																	189	5.6516	5.31448	5.98871	4.76066	6.54254	0.016003	5.04188e-06	463.383
164	5.14075																	190	5.66745	5.33327	6.00162	4.77761	6.55728	0.0156943	5.00549e-06	469.042
165	5.16594																	191	5.68299	5.35173	6.01425	4.79425	6.57173	0.0153906	4.9704e-06	474.717
166	5.1907																	192	5.69823	5.36986	6.02659	4.81056	6.58589	0.0150918	4.92685e-06	480.408
167	5.21502																	193	5.71317	5.38768	6.03866	4.82657	6.59978	0.014798	4.88331e-06	486.114
168	5.23891																	194	5.72783	5.40519	6.05046	4.84226	6.61339	0.014509	4.83717e-06	491.834
169	5.26239																	195	5.74219	5.42238	6.062	4.85766	6.62673	0.0142249	4.79557e-06	497.569
170	5.28545																	196	5.75628	5.43926	6.07329	4.87275	6.63981	0.0139456	4.74943e-06	503.318
171	5.3081																	197	5.77008	5.45583	6.08434	4.88754	6.65263	0.013671	4.69679e-06	509.082
172	5.33034																	198	5.78362	5.4721	6.09514	4.90205	6.66519	0.0134012	4.65065e-06	514.859
173	5.35219																	199	5.79689	5.48806	6.10572	4.91626	6.67751	0.013136	4.59801e-06	520.649
174	5.37364																	200	5.80989	5.50372	6.11606	4.9302	6.68959	0.0128753	4.54341e-06	526.452
175	5.3947																	201	5.82264	5.51909	6.12619	4.94385	6.70143	0.0126193	4.49727e-06	532.269
176	5.41537																	202	5.83513	5.53416	6.13611	4.95723	6.71304	0.0123677	4.44528e-06	538.097
177	5.43567																	203	5.84738	5.54893	6.14582	4.97034	6.72441	0.0121205	4.38939e-06	543.939
178	5.4556																	204	5.85938	5.56342	6.15533	4.98318	6.73557	0.0118778	4.33285e-06	549.792
179	5.47515																	205	5.87113	5.57762	6.16465	4.99576	6.74651	0.0116394	4.27956e-06	555.657
180	5.49434																	206	5.88266	5.59153	6.17378	5.00808	6.75723	0.0114053	4.22757e-06	561.534
181	5.51318																	207	5.89395	5.60517	6.18273	5.02015	6.76774	0.0111754	4.17232e-06	567.423
182	5.53166																	208	5.90501	5.61852	6.1915	5.03197	6.77805	0.0109496	4.11773e-06	573.322
183	5.54979																	209	5.91585	5.6316	6.20009	5.04354	6.78816	0.010728	4.05989e-06	579.233
184	5.56759																	210	5.92647	5.64441	6.20853	5.05487	6.79806	0.0105105	4.00465e-06	585.154
185	5.58504																	211	5.93687	5.65694	6.2168	5.06596	6.80778	0.0102969	3.95136e-06	591.085
186	5.60216																	212	5.94706	5.66921	6.22491	5.07682	6.81731	0.0100873	3.89287e-06	597.027
187	5.61896	6.29667																213	5.95705	5.68122	6.23287	5.08744	6.82665	0.00988162	3.83828e-06	602.98
188	5.63544																	214	5.96683	5.69296	6.24069	5.09785	6.83581	0.00967975	3.78369e-06	608.941
189	5.6516																	215	5.97641	5.70445	6.24837	5.10802	6.84479	0.00948166	3.7226e-06	614.913
190	5.66745																	216	5.98579	5.71568	6.2559	5.11799	6.8536	0.0092873	3.66996e-06	620.894
191	5.68299																	217	5.99498	5.72666	6.2633	5.12773	6.86223	0.00909661	3.61536e-06	626.885
192	5.69823																	218	6.00398	5.73739	6.27058	5.13727	6.8707	0.00890953	3.55817e-06	632.884
193	5.71317																	219	6.0128	5.74788	6.27772	5.1466	6.87901	0.00872601	3.50358e-06	638.893
194	5.72783																	220	6.02144	5.75813	6.28475	5.15573	6.88715	0.008546	3.45029e-06	644.91
195	5.74219																	221	6.0299	5.76813	6.29166	5.16465	6.89514	0.00836943	3.3957e-06	650.935
196	5.75628																	222	6.03818	5.77791	6.29845	5.17339	6.90297	0.00819626	3.34046e-06	656.969
197	5.77008																	223	6.04629	5.78745	6.30513	5.18193	6.91065	0.00802643	3.28392e-06	663.012
198	5.78362																	224	6.05423	5.79676	6.31171	5.19028	6.91819	0.00785988	3.22933e-06	669.062
199	5.79689																	225	6.06201	5.80584	6.31818	5.19844	6.92558	0.00769657	3.18123e-06	675.12
200	5.80989																	226	6.06963	5.81471	6.32454	5.20643	6.93282	0.00753644	3.12664e-06	681.186
201	5.82264																	227	6.07708	5.82336	6.33081	5.21424	6.93993	0.00737944	3.0753e-06	687.259
202	5.83513																	228	6.08439	5.83179	6.33698	5.22187	6.9469	0.00722551	3.02266e-06	693.34
203	5.84738																	229	6.09154	5.84001	6.34306	5.22934	6.95374	0.0070746	2.97392e-06	699.428
204	5.85938																	230	6.09854	5.84803	6.34904	5.23663	6.96044	0.00692667	2.92063e-06	705.523
205	5.87113																	231	6.10539	5.85584	6.35494	5.24376	6.96702	0.00678166	2.87253e-06	711.625
206	5.88266																	232	6.1121	5.86345	6.36075	5.25073	6.97347	0.00663952	2.81989e-06	717.734
207	5.89395																	233	6.11867	5.87086	6.36648	5.25755	6.97979	0.0065002	2.7718e-06	723.849
208	5.90501																	234	6.1251	5.87808	6.37212	5.26421	6.986	0.00636365	2.72566e-06	729.971
209	5.91585																	235	6.1314	5.88512	6.37768	5.27071	6.99208	0.00622983	2.67497e-06	736.099
210	5.92647																	236	6.13756	5.89196	6.38316	5.27707	6.99805	0.00609869	2.62752e-06	742.234
211	5.93687																	237	6.1436	5.89862	6.38857	5.28329	7.00391	0.00597017	2.58268e-06	748.374
212	5.94706	6.29667																238	6.1495	5.90511	6.3939	5.28936	7.00965	0.00584424	2.53654e-06	754.521
213	5.95705																	239	6.15529	5.91142	6.39915	5.29529	7.01528	0.00572084	2.49105e-06	760.673
214	5.96683																	240	6.16095	5.91756	6.40434	5.30108	7.02081	0.00559993	2.4436e-06	766.831
215	5.97641																	241	6.16649	5.92353	6.40945	5.30675	7.02623	0.00548146	2.39941e-06	772.995
216	5.98579																	242	6.17191	5.92933	6.41449	5.31228	7.03154	0.0053654	2.35522e-06	779.164
217	5.99498																	243	6.17722	5.93498	6.41946	5.31768	7.03676	0.00525169	2.31428e-06	785.339
218	6.00398																	244	6.18241	5.94046	6.42436	5.32296	7.04187	0.00514029	2.27008e-06	791.519
219	6.0128																	245	6.1875	5.9458	6.4292	5.32811	7.04689	0.00503116	2.22979e-06	797.704
220	6.02144																	246	6.19248	5.95098	6.43397	5.33315	7.05181	0.00492426	2.18495e-06	803.894
221	6.0299																	247	6.19735	5.95602	6.43868	5.33807	7.05663	0.00481955	2.1414e-06	810.089
222	6.03818																	248	6.20212	5.96091	6.44332	5.34287	7.06136	0.00471698	2.10306e-06	816.288
223	6.04629																	249	6.20678	5.96566	6.4479	5.34756	7.06601	0.00461651	2.06407e-06	822.493
224	6.05423																	250	6.21135	5.97028	6.45242	5.35214	7.07056	0.00451811	2.02572e-06	828.702
225	6.06201																	251	6.21582	5.97476	6.45688	5.35662	7.07503	0.00442174	1.98803e-06	834.916
226	6.06963																	252	6.22019	5.97912	6.46127	5.36098	7.07941	0.00432735	1.94903e-06	841.134
227	6.07708																	253	6.22448	5.98334	6.46561	5.36525	7.0837	0.00423492	1.91069e-06	847.356
228	6.08439																	254	6.22867	5.98744	6.46989	5.36941	7.08792	0.00414439	1.87625e-06	853.582
229	6.09154																	255	6.23277	5.99143	6.4741	5.37348	7.09205	0.00405574	1.8405e-06	859.813
230	6.09854																	256	6.23678	5.99529	6.47826	5.37745	7.0961	0.00396893	1.80476e-06	866.048
231	6.10539																	257	6.2407	5.99904	6.48237	5.38133	7.10008	0.00388392	1.76576e-06	872.287
232	6.1121																	258	6.24455	6.00268	6.48641	5.38511	7.10398	0.00380068	1.73457e-06	878.529
233	6.11867																	259	6.24831	6.00621	6.4904	5.38881	7.1078	0.00371917	1.69817e-06	884.776
234	6.1251																	260	6.25198	6.00963	6.49434	5.39242	7.11155	0.00363936	1.66633e-06	891.026
235	6.1314																	261	6.25558	6.01295	6.49822	5.39594	7.11523	0.00356122	1.63449e-06	897.28
236	6.13756																	262	6.25911	6.01617	6.50204	5.39937	7.11884	0.00348471	1.59809e-06	903.537
237	6.1436	6.29667																263	6.26255	6.0193	6.50581	5.40273	7.12238	0.00340981	1.57015e-06	909.798
238	6.1495																	264	6.26593	6.02233	6.50953	5.40601	7.12585	0.00333647	1.5396e-06	916.062
239	6.15529																	265	6.26923	6.02527	6.51319	5.4092	7.12925	0.00326467	1.50646e-06	922.33
240	6.16095																	266	6.27246	6.02811	6.5168	5.41232	7.13259	0.00319438	1.47851e-06	928.601
241	6.16649																	267	6.27562	6.03087	6.52036	5.41537	7.13586	0.00312557	1.44927e-06	934.875
242	6.17191																	268	6.27871	6.03355	6.52387	5.41834	7.13907	0.0030582	1.41677e-06	941.152
243	6.17722																	269	6.28173	6.03614	6.52732	5.42125	7.14222	0.00299226	1.39142e-06	947.432
244	6.18241																	270	6.28469	6.03866	6.53073	5.42408	7.14531	0.00292771	1.36413e-06	953.715
245	6.1875																	271	6.28759	6.0411	6.53409	5.42684	7.14834	0.00286452	1.33488e-06	960.001
246	6.19248																	272	6.29042	6.04346	6.53739	5.42954	7.15131	0.00280266	1.30954e-06	966.29
247	6.19735																	273	6.2932	6.04574	6.54065	5.43218	7.15422	0.00274211	1.28159e-06	972.582
248	6.20212																	274	6.29591	6.04796	6.54385	5.43475	7.15707	0.00268285	1.2543e-06	978.877
249	6.20678																	275	6.29856	6.05011	6.54701	5.43725	7.15987	0.00262484	1.2296e-06	985.174
250	6.21135																	276	6.30116	6.05219	6.55013	5.4397	7.16262	0.00256806	1.20555e-06	991.474
251	6.21582																	277	6.3037	6.05421	6.55319	5.44209	7.16531	0.00251249	1.17956e-06	997.776
252	6.22019																	278	6.30618	6.05616	6.55621	5.44442	7.16795	0.0024581	1.15486e-06	1004.08
253	6.22448																	279	6.30862	6.05805	6.55918	5.4467	7.17054	0.00240486	1.13147e-06	1010.39
254	6.22867																	280	6.31099	6.05989	6.5621	5.44892	7.17307	0.00235276	1.11067e-06	1016.7
255	6.23277																	281	6.31332	6.06166	6.56498	5.45108	7.17556	0.00230177	1.08402e-06	1023.01
256	6.23678																	282	6.3156	6.06338	6.56781	5.4532	7.178	0.00225186	1.06648e-06	1029.33
257	6.2407																	283	6.31783	6.06505	6.5706	5.45526	7.18039	0.00220302	1.04113e-06	1035.64
258	6.24455																	284	6.32	6.06666	6.57335	5.45727	7.18274	0.00215522	1.01968e-06	1041.96
259	6.24831																	285	6.32214	6.06822	6.57605	5.45923	7.18504	0.00210844	9.99538e-07	1048.28
260	6.25198																	286	6.32422	6.06973	6.57871	5.46115	7.18729	0.00206266	9.77442e-07	1054.61
261	6.25558																	287	6.32626	6.0712	6.58133	5.46302	7.1895	0.00201786	9.59895e-07	1060.93
262	6.25911	6.29667																288	6.32826	6.07261	6.5839	5.46485	7.19167	0.00197403	9.39748e-07	1067.26
263	6.26255																	289	6.33021	6.07399	6.58643	5.46663	7.19379	0.00193112	9.18951e-07	1073.59
264	6.26593																	290	6.33212	6.07531	6.58893	5.46836	7.19588	0.00188914	9.02054e-07	1079.92
265	6.26923																	291	6.33399	6.0766	6.59138	5.47006	7.19792	0.00184806	8.79308e-07	1086.25
266	6.27246																	292	6.33582	6.07784	6.59379	5.47171	7.19992	0.00180786	8.6176e-07	1092.59
267	6.27562																	293	6.3376	6.07905	6.59616	5.47333	7.20188	0.00176853	8.44213e-07	1098.92
268	6.27871																	294	6.33935	6.08022	6.59849	5.4749	7.20381	0.00173004	8.27316e-07	1105.26
269	6.28173																	295	6.34106	6.08135	6.60078	5.47644	7.20569	0.00169237	8.12368e-07	1111.6
270	6.28469																	296	6.34274	6.08244	6.60304	5.47794	7.20754	0.00165552	7.92222e-07	1117.94
271	6.28759																	297	6.34438	6.0835	6.60526	5.4794	7.20935	0.00161946	7.77924e-07	1124.29
272	6.29042																	298	6.34598	6.08452	6.60744	5.48083	7.21113	0.00158418	7.61027e-07	1130.63
273	6.2932																	299	6.34754	6.08551	6.60958	5.48222	7.21287	0.00154965	7.46079e-07	1136.98
274	6.29591																	300	6.34908	6.08647	6.61169	5.48358	7.21458	0.00151587	7.27882e-07	1143.33
275	6.29856																	301	6.35058	6.08739	6.61376	5.4849	7.21625	0.00148282	7.12285e-07	1149.68
276	6.30116																	302	6.35204	6.08829	6.6158	5.4862	7.21789	0.00145048	6.97987e-07	1156.03
277	6.3037																	303	6.35348	6.08916	6.6178	5.48746	7.2195	0.00141884	6.84339e-07	1162.38
278	6.30618																	304	6.35488	6.09	6.61976	5.48869	7.22107	0.00138789	6.64192e-07	1168.74
279	6.30862																	305	6.35625	6.09081	6.6217	5.48989	7.22262	0.0013576	6.57044e-07	1175.09
280	6.31099																	306	6.3576	6.0916	6.6236	5.49106	7.22413	0.00132796	6.40146e-07	1181.45
281	6.31332																	307	6.35891	6.09236	6.62546	5.49221	7.22561	0.00129897	6.27798e-07	1187.81
282	6.3156																	308	6.36019	6.09309	6.6273	5.49332	7.22707	0.00127061	6.148e-07	1194.17
283	6.31783																	309	6.36145	6.0938	6.6291	5.49441	7.22849	0.00124286	6.01153e-07	1200.53
284	6.32																	310	6.36268	6.09449	6.63087	5.49547	7.22989	0.00121571	5.88805e-07	1206.89
285	6.32214																	311	6.36388	6.09515	6.63261	5.49651	7.23126	0.00118914	5.78406e-07	1213.25
286	6.32422																	312	6.36506	6.0958	6.63432	5.49752	7.2326	0.00116316	5.63459e-07	1219.62
287	6.32626	6.29667																313	6.36621	6.09642	6.636	5.4985	7.23391	0.00113773	5.51761e-07	1225.98
288	6.32826																	314	6.36733	6.09702	6.63765	5.49947	7.2352	0.00111286	5.38763e-07	1232.35
289	6.33021																	315	6.36844	6.0976	6.63927	5.50041	7.23647	0.00108853	5.29014e-07	1238.72
290	6.33212																	316	6.36951	6.09816	6.64086	5.50132	7.2377	0.00106472	5.17316e-07	1245.09
291	6.33399																	317	6.37057	6.09871	6.64242	5.50222	7.23892	0.00104143	5.07568e-07	1251.46
292	6.33582																	318	6.3716	6.09923	6.64396	5.50309	7.2401	0.00101865	4.9457e-07	1257.83
293	6.3376																	319	6.3726	6.09974	6.64547	5.50394	7.24127	0.000996363	4.84172e-07	1264.2
294	6.33935																	320	6.37359	6.10023	6.64695	5.50477	7.24241	0.000974559	4.73773e-07	1270.57
295	6.34106																	321	6.37455	6.1007	6.6484	5.50558	7.24353	0.00095323	4.62075e-07	1276.95
296	6.34274																	322	6.37549	6.10116	6.64983	5.50637	7.24462	0.000932364	4.54926e-07	1283.32
297	6.34438																	323	6.37642	6.1016	6.65123	5.50714	7.2457	0.000911952	4.48427e-07	1289.7
298	6.34598																	324	6.37732	6.10203	6.65261	5.50789	7.24675	0.000891984	4.35429e-07	1296.07
299	6.34754																	325	6.3782	6.10244	6.65396	5.50862	7.24778	0.00087245	4.24381e-07	1302.45
300	6.34908																	326	6.37906	6.10284	6.65528	5.50934	7.24879	0.000853342	4.15283e-07	1308.83
301	6.35058																	327	6.37991	6.10323	6.65659	5.51004	7.24978	0.000834649	4.10084e-07	1315.21
302	6.35204																	328	6.38073	6.1036	6.65786	5.51072	7.25075	0.000816364	3.97086e-07	1321.59
303	6.35348																	329	6.38154	6.10396	6.65912	5.51138	7.2517	0.000798477	3.87987e-07	1327.97
304	6.35488																	330	6.38233	6.10431	6.66035	5.51203	7.25263	0.00078098	3.80188e-07	1334.35
305	6.35625																	331	6.3831	6.10464	6.66156	5.51266	7.25354	0.000763864	3.76939e-07	1340.74
306	6.3576																	332	6.38386	6.10497	6.66275	5.51328	7.25444	0.000747121	3.63941e-07	1347.12
307	6.35891																	333	6.3846	6.10528	6.66391	5.51388	7.25531	0.000730743	3.58092e-07	1353.5
308	6.36019																	334	6.38532	6.10558	6.66506	5.51447	7.25617	0.000714723	3.47694e-07	1359.89
309	6.36145																	335	6.38603	6.10587	6.66618	5.51504	7.25701	0.000699052	3.41195e-07	1366.27
310	6.36268																	336	6.38672	6.10616	6.66728	5.5156	7.25783	0.000683723	3.34046e-07	1372.66
311	6.36388																	337	6.38739	6.10643	6.66836	5.51615	7.25864	0.000668728	3.26897e-07	1379.05
312	6.36506	6.29667																338	6.38806	6.10669	6.66942	5.51668	7.25943	0.000654061	3.21698e-07	1385.44
313	6.36621																	339	6.3887	6.10694	6.67046	5.5172	7.2602	0.000639714	3.13249e-07	1391.82
314	6.36733																	340	6.38934	6.10719	6.67148	5.51771	7.26096	0.00062568	3.04151e-07	1398.21
315	6.36844																	341	6.38995	6.10742	6.67249	5.5182	7.2617	0.000611953	3.01551e-07	1404.6
316	6.36951																	342	6.39056	6.10765	6.67347	5.51869	7.26243	0.000598526	2.93103e-07	1410.99
317	6.37057																	343	6.39115	6.10787	6.67443	5.51916	7.26315	0.000585392	2.85304e-07	1417.38
318	6.3716																	344	6.39173	6.10808	6.67538	5.51962	7.26384	0.000572545	2.84654e-07	1423.77
319	6.3726																	345	6.3923	6.10828	6.67631	5.52006	7.26453	0.000559979	2.71006e-07	1430.17
320	6.37359																	346	6.39285	6.10848	6.67722	5.5205	7.2652	0.000547687	2.67107e-07	1436.56
321	6.37455																	347	6.39339	6.10867	6.67812	5.52093	7.26586	0.000535665	2.63207e-07	1442.95
322	6.37549																	348	6.39392	6.10885	6.67899	5.52134	7.2665	0.000523905	2.54759e-07	1449.35
323	6.37642																	349	6.39444	6.10902	6.67985	5.52175	7.26713	0.000512403	2.51509e-07	1455.74
324	6.37732																	350	6.39495	6.10919	6.6807	5.52215	7.26775	0.000501152	2.4566e-07	1462.13
325	6.3782																	351	6.39544	6.10936	6.68153	5.52253	7.26835	0.000490148	2.41111e-07	1468.53
326	6.37906																	352	6.39593	6.10951	6.68234	5.52291	7.26894	0.000479384	2.38511e-07	1474.93
327	6.37991																	353	6.3964	6.10967	6.68314	5.52328	7.26952	0.000468856	2.29413e-07	1481.32
328	6.38073																	354	6.39686	6.10981	6.68392	5.52364	7.27009	0.000458558	2.28113e-07	1487.72
329	6.38154																	355	6.39732	6.10995	6.68468	5.52399	7.27065	0.000448486	2.21614e-07	1494.12
330	6.38233																	356	6.39776	6.11009	6.68544	5.52433	7.27119	0.000438634	2.16415e-07	1500.51
331	6.3831																	357	6.3982	6.11022	6.68617	5.52466	7.27173	0.000428998	2.11866e-07	1506.91
332	6.38386																	358	6.39862	6.11034	6.6869	5.52499	7.27225	0.000419573	2.06667e-07	1513.31
333	6.3846																	359	6.39903	6.11046	6.68761	5.52531	7.27276	0.000410355	2.00168e-07	1519.71
334	6.38532																	360	6.39944	6.11058	6.6883	5.52562	7.27326	0.000401339	1.95618e-07	1526.11
335	6.38603																	361	6.39984	6.11069	6.68899	5.52592	7.27375	0.00039252	1.91719e-07	1532.51
336	6.38672																	362	6.40023	6.11079	6.68966	5.52621	7.27424	0.000383894	1.89769e-07	1538.91
337	6.38739	6.29667																363	6.40061	6.1109	6.69031	5.5265	7.27471	0.000375458	1.8262e-07	1545.31
338	6.38806																	364	6.40098	6.111	6.69096	5.52678	7.27517	0.000367206	1.80671e-07	1551.71
339	6.3887																	365	6.40134	6.11109	6.69159	5.52706	7.27562	0.000359135	1.76121e-07	1558.11
340	6.38934																	366	6.40169	6.11118	6.69221	5.52733	7.27606	0.000351241	1.72222e-07	1564.51
341	6.38995																	367	6.40204	6.11127	6.69281	5.52759	7.2765	0.000343521	1.70922e-07	1570.91
342	6.39056																	368	6.40238	6.11135	6.69341	5.52784	7.27692	0.000335969	1.64423e-07	1577.32
343	6.39115																	369	6.40271	6.11143	6.69399	5.52809	7.27734	0.000328583	1.61824e-07	1583.72
344	6.39173																	370	6.40304	6.11151	6.69457	5.52833	7.27775	0.00032136	1.58574e-07	1590.12
345	6.3923																	371	6.40336	6.11159	6.69513	5.52857	7.27815	0.000314294	1.52075e-07	1596.52
346	6.39285																	372	6.40367	6.11166	6.69568	5.5288	7.27854	0.000307384	1.53375e-07	1602.93
347	6.39339																	373	6.40397	6.11173	6.69622	5.52902	7.27892	0.000300625	1.52075e-07	1609.33
348	6.39392																	374	6.40427	6.11179	6.69675	5.52924	7.27929	0.000294015	1.47526e-07	1615.74
349	6.39444																	375	6.40456	6.11185	6.69727	5.52946	7.27966	0.000287549	1.42977e-07	1622.14
350	6.39495																	376	6.40484	6.11191	6.69777	5.52967	7.28002	0.000281226	1.34528e-07	1628.54
351	6.39544																	377	6.40512	6.11197	6.69827	5.52987	7.28037	0.000275041	1.35828e-07	1634.95
352	6.39593																	378	6.40539	6.11203	6.69876	5.53007	7.28072	0.000268992	1.33228e-07	1641.35
353	6.3964																	379	6.40566	6.11208	6.69924	5.53027	7.28105	0.000263076	1.28679e-07	1647.76
354	6.39686																	380	6.40592	6.11213	6.69971	5.53046	7.28139	0.00025729	1.29329e-07	1654.17
355	6.39732																	381	6.40617	6.11218	6.70017	5.53064	7.28171	0.000251631	1.26729e-07	1660.57
356	6.39776																	382	6.40642	6.11222	6.70062	5.53082	7.28203	0.000246096	1.2348e-07	1666.98
357	6.3982																	383	6.40667	6.11227	6.70107	5.531	7.28234	0.000240682	1.18931e-07	1673.39
358	6.39862																	384	6.40691	6.11231	6.7015	5.53117	7.28264	0.000235388	1.18281e-07	1679.79
359	6.39903																	385	6.40714	6.11235	6.70193	5.53134	7.28294	0.00023021	1.15681e-07	1686.2
360	6.39944																	386	6.40737	6.11239	6.70234	5.5315	7.28323	0.000225145	1.12432e-07	1692.61
361	6.39984																	387	6.40759	6.11242	6.70275	5.53166	7.28351	0.000220192	1.07883e-07	1699.01
362	6.40023	6.29667																388	6.40781	6.11246	6.70315	5.53182	7.28379	0.000215347	1.07883e-07	1705.42
363	6.40061																	389	6.40802	6.11249	6.70355	5.53197	7.28407	0.000210609	1.05283e-07	1711.83
364	6.40098																	390	6.40823	6.11252	6.70393	5.53212	7.28434	0.000205975	1.02033e-07	1718.24
365	6.40134																	391	6.40843	6.11255	6.70431	5.53226	7.2846	0.000201443	9.8784e-08	1724.65
366	6.40169																	392	6.40863	6.11258	6.70468	5.53241	7.28486	0.000197011	9.61844e-08	1731.05
367	6.40204																	393	6.40883	6.11261	6.70504	5.53254	7.28511	0.000192676	9.55345e-08	1737.46
368	6.40238																	394	6.40902	6.11263	6.7054	5.53268	7.28535	0.000188436	9.03354e-08	1743.87
369	6.40271																	395	6.4092	6.11266	6.70575	5.53281	7.28559	0.000184289	8.96855e-08	1750.28
370	6.40304																	396	6.40938	6.11268	6.70609	5.53294	7.28583	0.000180233	9.03354e-08	1756.69
371	6.40336																	397	6.40956	6.1127	6.70642	5.53306	7.28606	0.000176267	8.77358e-08	1763.1
372	6.40367																	398	6.40974	6.11272	6.70675	5.53318	7.28629	0.000172388	8.77358e-08	1769.51
373	6.40397																	399	6.40991	6.11274	6.70707	5.5333	7.28651	0.000168594	8.31865e-08	1775.92
374	6.40427																	400	6.41007	6.11276	6.70739	5.53342	7.28673	0.000164883	7.99371e-08	1782.33
375	6.40456																	401	6.41024	6.11277	6.7077	5.53353	7.28694	0.000161254	7.86373e-08	1788.74
376	6.40484																	402	6.4104	6.11279	6.708	5.53364	7.28715	0.000157705	7.99371e-08	1795.15
377	6.40512																	403	6.41055	6.11281	6.7083	5.53375	7.28735	0.000154234	7.4088e-08	1801.56
378	6.40539																	404	6.41071	6.11282	6.70859	5.53386	7.28755	0.000150839	7.60377e-08	1807.97
379	6.40566																	405	6.41085	6.11283	6.70888	5.53396	7.28775	0.000147519	7.60377e-08	1814.38
380	6.40592																	406	6.411	6.11285	6.70916	5.53406	7.28794	0.000144272	7.01886e-08	1820.79
381	6.40617																	407	6.41114	6.11286	6.70943	5.53416	7.28813	0.000141096	6.69392e-08	1827.2
382	6.40642																	408	6.41128	6.11287	6.7097	5.53426	7.28831	0.00013799	6.69392e-08	1833.61
383	6.40667																	409	6.41142	6.11288	6.70996	5.53435	7.28849	0.000134952	6.43396e-08	1840.03
384	6.40691																	410	6.41155	6.11289	6.71022	5.53444	7.28866	0.000131981	6.43396e-08	1846.44
385	6.40714																	411	6.41168	6.11289	6.71047	5.53453	7.28884	0.000129076	6.62893e-08	1852.85
386	6.40737																	412	6.41181	6.1129	6.71072	5.53462	7.28901	0.000126234	6.36897e-08	1859.26
387	6.40759	6.29667																413	6.41194	6.11291	6.71096	5.5347	7.28917	0.000123455	5.97903e-08	1865.67
388	6.40781																	414	6.41206	6.11292	6.7112	5.53478	7.28933	0.000120737	5.84905e-08	1872.08
389	6.40802																	415	6.41218	6.11292	6.71143	5.53486	7.28949	0.000118079	5.84905e-08	1878.5
390	6.40823																	416	6.41229	6.11293	6.71166	5.53494	7.28965	0.000115479	5.71907e-08	1884.91
391	6.40843																	417	6.41241	6.11293	6.71188	5.53502	7.2898	0.000112937	5.58909e-08	1891.32
392	6.40863																	418	6.41252	6.11293	6.7121	5.53509	7.28995	0.00011045	5.39413e-08	1897.73
393	6.40883																	419	6.41263	6.11294	6.71232	5.53517	7.29009	0.000108019	5.19916e-08	1904.15
394	6.40902																	420	6.41274	6.11294	6.71253	5.53524	7.29023	0.00010564	5.26415e-08	1910.56
395	6.4092																	421	6.41284	6.11294	6.71274	5.53531	7.29037	0.000103314	5.06918e-08	1916.97
396	6.40938																	422	6.41294	6.11295	6.71294	5.53538	7.29051	0.000101039	4.87421e-08	1923.38
397	6.40956																	423	6.41304	6.11295	6.71314	5.53544	7.29064	9.88145e-05	4.87421e-08	1929.8
398	6.40974																	424	6.41314	6.11295	6.71333	5.53551	7.29077	9.66387e-05	4.67924e-08	1936.21
399	6.40991																	425	6.41324	6.11295	6.71352	5.53557	7.2909	9.45108e-05	4.74423e-08	1942.62
400	6.41007																	426	6.41333	6.11295	6.71371	5.53563	7.29103	9.24296e-05	4.48427e-08	1949.04
401	6.41024																	427	6.41342	6.11295	6.71389	5.53569	7.29115	9.03943e-05	4.54926e-08	1955.45
402	6.4104																	428	6.41351	6.11295	6.71407	5.53575	7.29127	8.84037e-05	4.41928e-08	1961.86
403	6.41055																	429	6.4136	6.11295	6.71424	5.53581	7.29139	8.6457e-05	4.09434e-08	1968.28
404	6.41071																	430	6.41368	6.11295	6.71442	5.53586	7.2915	8.45531e-05	4.09434e-08	1974.69
405	6.41085																	431	6.41377	6.11295	6.71458	5.53592	7.29161	8.26911e-05	4.22432e-08	1981.11
406	6.411																	432	6.41385	6.11295	6.71475	5.53597	7.29172	8.08701e-05	4.02935e-08	1987.52
407	6.41114																	433	6.41393	6.11294	6.71491	5.53602	7.29183	7.90892e-05	4.02935e-08	1993.93
408	6.41128																	434	6.41401	6.11294	6.71507	5.53607	7.29194	7.73474e-05	3.63941e-08	2000.35
409	6.41142																	435	6.41408	6.11294	6.71522	5.53612	7.29204	7.5644e-05	3.76939e-08	2006.76
410	6.41155																	436	6.41416	6.11294	6.71538	5.53617	7.29214	7.39781e-05	3.50943e-08	2013.18
411	6.41168																	437	6.41423	6.11294	6.71553	5.53622	7.29224	7.23489e-05	3.76939e-08	2019.59
412	6.41181	6.29667																438	6.4143	6.11293	6.71567	5.53627	7.29234	7.07555e-05	3.50943e-08	2026
413	6.41194																	439	6.41437	6.11293	6.71581	5.53631	7.29243	6.91972e-05	3.37945e-08	2032.42
414	6.41206																	440	6.41444	6.11293	6.71595	5.53635	7.29253	6.76733e-05	3.50943e-08	2038.83
415	6.41218																	441	6.41451	6.11292	6.71609	5.5364	7.29262	6.61828e-05	3.24947e-08	2045.25
416	6.41229																	442	6.41457	6.11292	6.71623	5.53644	7.29271	6.47252e-05	2.85954e-08	2051.66
417	6.41241																	443	6.41464	6.11292	6.71636	5.53648	7.29279	6.32996e-05	3.18448e-08	2058.08
418	6.41252																	444	6.4147	6.11291	6.71649	5.53652	7.29288	6.19055e-05	2.59958e-08	2064.49
419	6.41263																	445	6.41476	6.11291	6.71661	5.53656	7.29296	6.0542e-05	2.92453e-08	2070.91
420	6.41274																	446	6.41482	6.1129	6.71674	5.5366	7.29305	5.92086e-05	2.72956e-08	2077.32
421	6.41284																	447	6.41488	6.1129	6.71686	5.53663	7.29313	5.79045e-05	2.92453e-08	2083.73
422	6.41294																	448	6.41494	6.11289	6.71698	5.53667	7.2932	5.66291e-05	2.85954e-08	2090.15
423	6.41304																	449	6.41499	6.11289	6.71709	5.5367	7.29328	5.53818e-05	2.59958e-08	2096.56
424	6.41314																	450	6.41505	6.11289	6.71721	5.53674	7.29336	5.4162e-05	2.72956e-08	2102.98
425	6.41324																	451	6.4151	6.11288	6.71732	5.53677	7.29343	5.2969e-05	2.66457e-08	2109.39
426	6.41333																	452	6.41515	6.11288	6.71743	5.5368	7.2935	5.18023e-05	2.53459e-08	2115.81
427	6.41342																	453	6.4152	6.11287	6.71754	5.53684	7.29357	5.06612e-05	2.66457e-08	2122.23
428	6.41351																	454	6.41525	6.11287	6.71764	5.53687	7.29364	4.95453e-05	2.4696e-08	2128.64
429	6.4136																	455	6.4153	6.11286	6.71775	5.5369	7.29371	4.8454e-05	2.59958e-08	2135.06
430	6.41368																	456	6.41535	6.11286	6.71785	5.53693	7.29378	4.73867e-05	2.4696e-08	2141.47
431	6.41377																	457	6.4154	6.11285	6.71795	5.53696	7.29384	4.63429e-05	2.40461e-08	2147.89
432	6.41385																	458	6.41544	6.11285	6.71804	5.53698	7.2939	4.53221e-05	2.27463e-08	2154.3
433	6.41393																	459	6.41549	6.11284	6.71814	5.53701	7.29397	4.43238e-05	2.40461e-08	2160.72
434	6.41401																	460	6.41553	6.11284	6.71823	5.53704	7.29403	4.33474e-05	2.01467e-08	2167.13
435	6.41408																	461	6.41558	6.11283	6.71832	5.53707	7.29409	4.23926e-05	2.01467e-08	2173.55
436	6.41416																	462	6.41562	6.11282	6.71841	5.53709	7.29414	4.14588e-05	1.68973e-08	2179.96
437	6.41423	6.29667																463	6.41566	6.11282	6.7185	5.53712	7.2942	4.05455e-05	2.20964e-08	2186.38
438	6.4143																	464	6.4157	6.11281	6.71858	5.53714	7.29426	3.96524e-05	2.14465e-08	2192.8
439	6.41437																	465	6.41574	6.11281	6.71867	5.53716	7.29431	3.87789e-05	1.68973e-08	2199.21
440	6.41444																	466	6.41578	6.1128	6.71875	5.53719	7.29436	3.79246e-05	2.07966e-08	2205.63
441	6.41451																	467	6.41581	6.1128	6.71883	5.53721	7.29442	3.70892e-05	2.01467e-08	2212.04
442	6.41457																	468	6.41585	6.11279	6.71891	5.53723	7.29447	3.62722e-05	1.75472e-08	2218.46
443	6.41464																	469	6.41589	6.11279	6.71899	5.53725	7.29452	3.54732e-05	1.68973e-08	2224.87
444	6.4147																	470	6.41592	6.11278	6.71906	5.53728	7.29457	3.46917e-05	1.81971e-08	2231.29
445	6.41476																	471	6.41596	6.11278	6.71914	5.5373	7.29462	3.39275e-05	1.62474e-08	2237.71
446	6.41482																	472	6.41599	6.11277	6.71921	5.53732	7.29466	3.31801e-05	1.62474e-08	2244.12
447	6.41488																	473	6.41602	6.11276	6.71928	5.53734	7.29471	3.24492e-05	1.68973e-08	2250.54
448	6.41494																	474	6.41605	6.11276	6.71935	5.53735	7.29475	3.17343e-05	1.55975e-08	2256.95
449	6.41499																	475	6.41609	6.11275	6.71942	5.53737	7.2948	3.10352e-05	1.29979e-08	2263.37
450	6.41505																	476	6.41612	6.11275	6.71948	5.53739	7.29484	3.03515e-05	1.68973e-08	2269.79
451	6.4151																	477	6.41615	6.11274	6.71955	5.53741	7.29488	2.96829e-05	1.62474e-08	2276.2
452	6.41515																	478	6.41618	6.11274	6.71961	5.53743	7.29492	2.9029e-05	1.29979e-08	2282.62
453	6.4152																	479	6.4162	6.11273	6.71968	5.53744	7.29497	2.83895e-05	1.55975e-08	2289.03
454	6.41525																	480	6.41623	6.11273	6.71974	5.53746	7.295	2.77641e-05	1.2348e-08	2295.45
455	6.4153																	481	6.41626	6.11272	6.7198	5.53748	7.29504	2.71524e-05	1.49476e-08	2301.87
456	6.41535																	482	6.41629	6.11272	6.71986	5.53749	7.29508	2.65542e-05	1.42977e-08	2308.28
457	6.4154																	483	6.41631	6.11271	6.71992	5.53751	7.29512	2.59692e-05	1.68973e-08	2314.7
458	6.41544																	484	6.41634	6.1127	6.71997	5.53752	7.29515	2.53971e-05	1.10482e-08	2321.12
459	6.41549																	485	6.41636	6.1127	6.72003	5.53754	7.29519	2.48376e-05	1.03983e-08	2327.53
460	6.41553																	486	6.41639	6.11269	6.72008	5.53755	7.29523	2.42904e-05	1.29979e-08	2333.95
461	6.41558																	487	6.41641	6.11269	6.72014	5.53757	7.29526	2.37553e-05	1.10482e-08	2340.37
462	6.41562																	488	6.41644	6.11268	6.72019	5.53758	7.29529	2.3232e-05	1.03983e-08	2346.78
463	6.41566																	489	6.41646	6.11268	6.72024	5.53759	7.29533	2.27201e-05	1.62474e-08	2353.2
464	6.4157																	490	6.41648	6.11267	6.72029	5.5376	7.29536	2.22196e-05	9.09853e-09	2359.61
465	6.41574																	491	6.4165	6.11267	6.72034	5.53762	7.29539	2.17301e-05	7.14884e-09	2366.03
466	6.41578																	492	6.41652	6.11266	6.72039	5.53763	7.29542	2.12513e-05	1.10482e-08	2372.45
467	6.41581																	493	6.41655	6.11266	6.72043	5.53764	7.29545	2.07831e-05	6.49895e-09	2378.86
468	6.41585																	494	6.41657	6.11265	6.72048	5.53765	7.29548	2.03253e-05	1.10482e-08	2385.28
469	6.41589																	495	6.41659	6.11265	6.72052	5.53767	7.29551	1.98775e-05	7.79874e-09	2391.7
470	6.41592																	496	6.41661	6.11264	6.72057	5.53768	7.29554	1.94396e-05	6.49895e-09	2398.11
471	6.41596																	497	6.41663	6.11264	6.72061	5.53769	7.29556	1.90113e-05	7.14884e-09	2404.53
472	6.41599																	498	6.41664	6.11263	6.72065	5.5377	7.29559	1.85924e-05	6.49895e-09	2410.95
473	6.41602																	499	6.41666	6.11263	6.7207	5.53771	7.29562	1.81828e-05	8.44863e-09	2417.36
474	6.41605																	500	6.41668	6.11263	6.72074	5.53772	7.29564	1.77822e-05	1.03983e-08	2423.78
475	6.41609
476	6.41612
477	6.41615
478	6.41618
479	6.4162
480	6.41623
481	6.41626
482	6.41629
483	6.41631
484	6.41634
485	6.41636
486	6.41639
487	6.41641
488	6.41644
489	6.41646
490	6.41648
491	6.4165
492	6.41652
493	6.41655
494	6.41657
495	6.41659
496	6.41661
497	6.41663
498	6.41664
499	6.41666
500	6.41668

## Sheet: Gompertz 5
T5
Gompertz M(a,b,c)	Parameters	Std Error	T Value	95% Conf Lim	95% Conf Lim	X Observed	Y Observed	Y Predicted	Y Residual	Y Residual%	95% Conf Lim	95% Conf Lim	95% Pred Lim	95% Pred Lim	First Deriv	Second Deriv	Area	X Generated	Y Predicted	95% Conf Lim	95% Conf Lim	95% Pred Lim	95% Pred Lim	First Deriv	Second Deriv	Area
8001	7.48514	0.360596	20.7577	6.72756	8.24273	0	0	0.010339	-0.010339	0	-0.0504252	0.0711033	-1.54497	1.56565	0.00116035	8.29369e-06	0	0	0.010339	-0.0504252	0.0711033	-1.54497	1.56565	0.00116035	8.29369e-06	0
0.953976	0.0469376	0.00865939	5.42043	0.0287449	0.0651303	4	0	0.0159568	-0.0159568	0	-0.0688917	0.100805	-1.54048	1.5724	0.00167282	9.90359e-06	0.051909	1	0.011556	-0.0546874	0.0777995	-1.54398	1.56709	0.00127502	8.69873e-06	0.010938
0.945854	51.9102	14.8806	3.48846	20.6473	83.1732	8.07639	0	0.0241123	-0.0241123	0	-0.0915655	0.13979	-1.53431	1.58254	0.00235812	1.1447e-05	0.132629	2	0.012892	-0.0591853	0.0849692	-1.5429	1.56869	0.00139838	9.10312e-06	0.0231517
0.739734						12.0764	0	0.035194	-0.035194	0	-0.117294	0.187682	-1.52639	1.59678	0.00321505	1.27466e-05	0.2501	3	0.0143558	-0.06392	0.0926316	-1.54174	1.57045	0.00153084	9.50532e-06	0.0367646
186.549						16.0764	0	0.0501043	-0.0501043	0	-0.145776	0.245984	-1.51632	1.61652	0.00427549	1.37193e-05	0.419283	4	0.0159568	-0.0688917	0.100805	-1.54048	1.5724	0.00167282	9.90359e-06	0.051909
						41.0764	0	0.284612	-0.284612	0	-0.286997	0.856222	-1.3713	1.94052	0.0158603	8.6674e-06	3.99707	5	0.0177047	-0.0740993	0.109509	-1.53913	1.57454	0.00182469	1.02959e-05	0.0687272
						66.0764	0	0.884915	-0.884915	0	0.0110171	1.75881	-0.89806	2.66789	0.0322038	-7.91955e-06	17.7556	6	0.0196096	-0.0795404	0.11876	-1.53767	1.57689	0.00198686	1.06806e-05	0.0873709
						91.0764	3.33333	1.85621	1.47713	44.3138	0.974403	2.73801	0.0693435	3.64307	0.0441143	-1.58765e-05	51.395	7	0.021682	-0.085211	0.128575	-1.53611	1.57948	0.00215971	1.10558e-05	0.108002
						116.076	3.33333	3.01113	0.322206	9.66618	2.24465	3.7776	1.27827	4.74398	0.0467337	-1.22545e-05	112.102	8	0.0239327	-0.0911062	0.138972	-1.53444	1.58231	0.00234361	1.14197e-05	0.130794
						141.076	3.33333	4.12988	-0.796544	-23.8963	3.38662	4.87313	2.40717	5.85259	0.0418587	-5.23204e-06	201.623	9	0.026373	-0.0972191	0.149965	-1.53266	1.5854	0.00253893	1.17703e-05	0.155931
						166.076	3.33333	5.07623	-1.74289	-52.2868	4.3254	5.82706	3.35024	6.80222	0.0335998	-1.3923e-07	317.132	10	0.0290145	-0.103541	0.161571	-1.53075	1.58878	0.00274602	1.21059e-05	0.183607
						191.076	7.03778	5.80841	1.22937	17.4682	5.10595	6.51086	4.1029	7.51391	0.0251073	2.21338e-06	453.633	11	0.0318691	-0.110064	0.173802	-1.52872	1.59246	0.00296522	1.24247e-05	0.214031
						216.076	7.03778	6.34265	0.695124	9.87704	5.73055	6.95476	4.67233	8.01297	0.0179045	2.76353e-06	605.897	12	0.0349491	-0.116774	0.186672	-1.52656	1.59646	0.00319684	1.27246e-05	0.247421
						241.076	7.03778	6.71779	0.319984	4.54666	6.18864	7.24695	5.07605	8.35953	0.0123841	2.47604e-06	769.44	13	0.038267	-0.12366	0.200194	-1.52427	1.6008	0.00344118	1.30043e-05	0.284009
						266.076	7.03778	6.97468	0.0631016	0.896612	6.48345	7.4659	5.34477	8.60458	0.00839673	1.93191e-06	940.803	14	0.0418358	-0.130706	0.214377	-1.52184	1.60551	0.00369852	1.32619e-05	0.324039
						291.076	7.03778	7.14771	-0.109935	-1.56206	6.64545	7.64997	5.51444	8.78098	0.00561954	1.4081e-06	1117.48	15	0.0456685	-0.137896	0.229233	-1.51926	1.6106	0.00396913	1.34957e-05	0.367768
						316.076	7.03778	7.26302	-0.225247	-3.20054	6.72195	7.80409	5.61741	8.90864	0.00372906	9.86651e-07	1297.71	16	0.0497786	-0.145212	0.244769	-1.51653	1.61609	0.00425323	1.37044e-05	0.415468
						341.076	7.03778	7.33933	-0.301554	-4.28479	6.75253	7.92614	5.67811	9.00055	0.00246085	6.76582e-07	1480.31	17	0.0541795	-0.152635	0.260994	-1.51365	1.622	0.00455103	1.38867e-05	0.467422
						366.076	7.03778	7.3896	-0.351818	-4.999	6.76099	8.0182	5.71316	9.06604	0.00161807	4.53062e-07	1664.46	18	0.0588852	-0.160142	0.277913	-1.5106	1.62837	0.00486271	1.40406e-05	0.523929
						391.076	7.03778	7.42261	-0.384829	-5.46805	6.75978	8.08544	5.73304	9.11218	0.0010614	3.02543e-07	1849.64	19	0.0639096	-0.167712	0.295531	-1.50738	1.6352	0.00518843	1.41656e-05	0.585299
						416.076	8.14889	7.44424	0.704644	8.64712	6.75499	8.1335	5.74413	9.14435	0.000695172	1.95675e-07	2035.5	20	0.0692668	-0.175318	0.313852	-1.50399	1.64252	0.00552832	1.42603e-05	0.651859
																		21	0.074971	-0.182936	0.332878	-1.50041	1.65035	0.00588246	1.43237e-05	0.723948
																		22	0.0810365	-0.190538	0.352611	-1.49664	1.65871	0.00625093	1.4355e-05	0.801921
																		23	0.0874777	-0.198093	0.373049	-1.49267	1.66762	0.00663374	1.43537e-05	0.886147
																		24	0.0943088	-0.205573	0.394191	-1.48848	1.6771	0.00703091	1.43184e-05	0.977007
X Generated	Y Predicted	Y Observed																25	0.101544	-0.212946	0.416034	-1.48408	1.68717	0.00744239	1.42498e-05	1.0749
0	0.010339	0																26	0.109198	-0.220178	0.438574	-1.47945	1.69784	0.00786812	1.41468e-05	1.18023
1	0.011556																	27	0.117285	-0.227235	0.461806	-1.47457	1.70914	0.008308	1.40093e-05	1.29344
2	0.012892																	28	0.125819	-0.234083	0.485721	-1.46943	1.72107	0.00876188	1.38376e-05	1.41495
3	0.0143558																	29	0.134814	-0.240685	0.510312	-1.46403	1.73366	0.00922959	1.36315e-05	1.54523
4	0.0159568	0																30	0.144283	-0.247006	0.535571	-1.45834	1.74691	0.00971093	1.33916e-05	1.68474
5	0.0177047																	31	0.15424	-0.253006	0.561486	-1.45236	1.76084	0.0102057	1.31184e-05	1.83396
6	0.0196096																	32	0.164698	-0.25865	0.588046	-1.44605	1.77545	0.0107135	1.28116e-05	1.99339
7	0.021682																	33	0.175671	-0.263897	0.615239	-1.43942	1.79076	0.0112342	1.24723e-05	2.16353
8	0.0239327	0																34	0.187171	-0.26871	0.643052	-1.43244	1.80678	0.0117673	1.21017e-05	2.3449
9	0.026373																	35	0.19921	-0.273049	0.671469	-1.42508	1.8235	0.0123125	1.17005e-05	2.53805
10	0.0290145																	36	0.2118	-0.276876	0.700476	-1.41734	1.84094	0.0128694	1.12688e-05	2.74351
11	0.0318691																	37	0.224952	-0.280152	0.730057	-1.40919	1.8591	0.0134376	1.08098e-05	2.96184
12	0.0349491	0																38	0.238679	-0.282838	0.760195	-1.40061	1.87797	0.0140166	1.0323e-05	3.1936
13	0.038267																	39	0.252989	-0.284895	0.790874	-1.39158	1.89756	0.014606	9.80932e-06	3.43939
14	0.0418358																	40	0.267894	-0.286287	0.822075	-1.38208	1.91787	0.0152051	9.27234e-06	3.69978
15	0.0456685																	41	0.283402	-0.286975	0.85378	-1.37208	1.93889	0.0158135	8.7118e-06	3.97538
16	0.0497786	0																42	0.299524	-0.286923	0.88597	-1.36157	1.96061	0.0164306	8.12882e-06	4.26679
17	0.0541795																	43	0.316266	-0.286095	0.918628	-1.35051	1.98304	0.0170558	7.52684e-06	4.57463
18	0.0588852																	44	0.333638	-0.284457	0.951732	-1.33889	2.00616	0.0176886	6.90665e-06	4.89953
19	0.0639096																	45	0.351646	-0.281974	0.985265	-1.32668	2.02997	0.0183282	6.26944e-06	5.24212
20	0.0692668																	46	0.370296	-0.278614	1.01921	-1.31386	2.05445	0.0189742	5.61807e-06	5.60304
21	0.074971																	47	0.389596	-0.274346	1.05354	-1.30041	2.0796	0.0196257	4.95212e-06	5.98293
22	0.0810365																	48	0.40955	-0.26914	1.08824	-1.2863	2.1054	0.0202822	4.27582e-06	6.38245
23	0.0874777																	49	0.430162	-0.262966	1.12329	-1.27152	2.13185	0.020943	3.59063e-06	6.80225
24	0.0943088																	50	0.451437	-0.255799	1.15867	-1.25604	2.15892	0.0216074	2.8973e-06	7.24299
25	0.101544																	51	0.473377	-0.247613	1.19437	-1.23984	2.1866	0.0222746	2.19753e-06	7.70534
26	0.109198																	52	0.495987	-0.238384	1.23036	-1.22291	2.21488	0.0229441	1.49362e-06	8.18997
27	0.117285																	53	0.519266	-0.228091	1.26662	-1.20522	2.24375	0.023615	7.87214e-07	8.69754
28	0.125819																	54	0.543217	-0.216713	1.30315	-1.18675	2.27319	0.0242868	8.14684e-08	9.22873
29	0.134814																	55	0.56784	-0.204232	1.33991	-1.1675	2.30318	0.0249586	-6.24089e-07	9.7842
30	0.144283																	56	0.593134	-0.190632	1.3769	-1.14744	2.33371	0.0256298	-1.32758e-06	10.3646
31	0.15424																	57	0.619099	-0.175898	1.4141	-1.12656	2.36476	0.0262997	-2.0258e-06	10.9707
32	0.164698																	58	0.645733	-0.160019	1.45148	-1.10485	2.39631	0.0269675	-2.71818e-06	11.603
33	0.175671																	59	0.673033	-0.142985	1.48905	-1.0823	2.42836	0.0276326	-3.40323e-06	12.2624
34	0.187171																	60	0.700997	-0.124786	1.52678	-1.0589	2.46089	0.0282944	-4.07906e-06	12.9493
35	0.19921																	61	0.72962	-0.105418	1.56466	-1.03463	2.49387	0.028952	-4.74454e-06	13.6646
36	0.2118																	62	0.758899	-0.0848756	1.60267	-1.00951	2.5273	0.0296049	-5.39893e-06	14.4088
37	0.224952																	63	0.788828	-0.0631573	1.64081	-0.98351	2.56117	0.0302524	-6.04032e-06	15.1826
38	0.238679																	64	0.819402	-0.0402633	1.67907	-0.95664	2.59544	0.0308939	-6.66742e-06	15.9867
39	0.252989																	65	0.850614	-0.0161956	1.71742	-0.928897	2.63013	0.0315287	-7.27853e-06	16.8216
40	0.267894																	66	0.882457	0.00904136	1.75587	-0.900282	2.6652	0.0321562	-7.87534e-06	17.6881
41	0.283402	0																67	0.914924	0.0354414	1.79441	-0.870795	2.70064	0.0327758	-8.4538e-06	18.5867
42	0.299524																	68	0.948006	0.0629963	1.83302	-0.840441	2.73645	0.033387	-9.01345e-06	19.5182
43	0.316266																	69	0.981695	0.0916959	1.87169	-0.809227	2.77262	0.0339892	-9.55466e-06	20.483
44	0.333638																	70	1.01598	0.121528	1.91043	-0.777158	2.80912	0.0345819	-1.00757e-05	21.4817
45	0.351646																	71	1.05086	0.152479	1.94923	-0.744244	2.84595	0.0351644	-1.0577e-05	22.5151
46	0.370296																	72	1.08631	0.184532	1.98808	-0.710496	2.88311	0.0357364	-1.10571e-05	23.5836
47	0.389596																	73	1.12232	0.21767	2.02698	-0.675925	2.92057	0.0362973	-1.15132e-05	24.6879
48	0.40955																	74	1.1589	0.251875	2.06592	-0.640545	2.95834	0.0368468	-1.19504e-05	25.8285
49	0.430162																	75	1.19601	0.287124	2.1049	-0.60437	2.9964	0.0373842	-1.23634e-05	27.0059
50	0.451437																	76	1.23366	0.323395	2.14393	-0.567418	3.03474	0.0379093	-1.27553e-05	28.2207
51	0.473377																	77	1.27183	0.360665	2.18299	-0.529705	3.07336	0.0384217	-1.3123e-05	29.4734
52	0.495987																	78	1.3105	0.398907	2.22209	-0.49125	3.11225	0.0389209	-1.34669e-05	30.7645
53	0.519266																	79	1.34967	0.438094	2.26124	-0.452074	3.1514	0.0394067	-1.37888e-05	32.0946
54	0.543217																	80	1.38931	0.478199	2.30042	-0.412197	3.19082	0.0398787	-1.40893e-05	33.464
55	0.56784																	81	1.42942	0.519192	2.33964	-0.371641	3.23048	0.0403366	-1.43623e-05	34.8733
56	0.593134																	82	1.46998	0.561041	2.37891	-0.33043	3.27039	0.0407801	-1.46144e-05	36.323
57	0.619099																	83	1.51097	0.603716	2.41823	-0.288587	3.31053	0.041209	-1.48451e-05	37.8134
58	0.645733																	84	1.55239	0.647183	2.4576	-0.246137	3.35092	0.0416231	-1.50483e-05	39.3451
59	0.673033																	85	1.59421	0.691409	2.49702	-0.203105	3.39153	0.0420221	-1.52335e-05	40.9183
60	0.700997																	86	1.63643	0.736359	2.5365	-0.159518	3.43238	0.0424059	-1.53936e-05	42.5336
61	0.72962																	87	1.67902	0.781998	2.57605	-0.115401	3.47344	0.0427744	-1.55317e-05	44.1913
62	0.758899																	88	1.72197	0.828289	2.61566	-0.0707821	3.51473	0.0431272	-1.56474e-05	45.8918
63	0.788828																	89	1.76527	0.875197	2.65534	-0.0256878	3.55623	0.0434645	-1.57431e-05	47.6354
64	0.819402																	90	1.8089	0.922684	2.69511	0.0198542	3.59794	0.043786	-1.58188e-05	49.4225
65	0.850614																	91	1.85284	0.970713	2.73496	0.0658161	3.63986	0.0440916	-1.58722e-05	51.2533
66	0.882457	0																92	1.89708	1.01925	2.7749	0.11217	3.68198	0.0443814	-1.59067e-05	53.1282
67	0.914924																	93	1.94159	1.06824	2.81495	0.158888	3.7243	0.0446553	-1.59225e-05	55.0475
68	0.948006																	94	1.98638	1.11767	2.85509	0.205943	3.76682	0.0449133	-1.59153e-05	57.0115
69	0.981695																	95	2.03142	1.16749	2.89535	0.253306	3.80953	0.0451554	-1.58925e-05	59.0204
70	1.01598																	96	2.07669	1.21766	2.93572	0.300951	3.85242	0.0453815	-1.58534e-05	61.0744
71	1.05086																	97	2.12217	1.26814	2.97621	0.348849	3.8955	0.0455918	-1.57951e-05	63.1738
72	1.08631																	98	2.16786	1.3189	3.01683	0.396975	3.93875	0.0457864	-1.57217e-05	65.3188
73	1.12232																	99	2.21374	1.36989	3.05759	0.445301	3.98218	0.0459652	-1.5631e-05	67.5096
74	1.1589																	100	2.25979	1.42109	3.09849	0.493801	4.02578	0.0461283	-1.55256e-05	69.7464
75	1.19601																	101	2.30599	1.47246	3.13953	0.54245	4.06954	0.046276	-1.54049e-05	72.0292
76	1.23366																	102	2.35234	1.52395	3.18072	0.591223	4.11345	0.0464082	-1.5272e-05	74.3584
77	1.27183																	103	2.3988	1.57554	3.22206	0.640095	4.15751	0.0465252	-1.51226e-05	76.734
78	1.3105																	104	2.44538	1.6272	3.26357	0.689042	4.20172	0.0466271	-1.49623e-05	79.156
79	1.34967																	105	2.49205	1.67888	3.30523	0.738041	4.24607	0.046714	-1.47881e-05	81.6248
80	1.38931																	106	2.5388	1.73055	3.34706	0.78707	4.29054	0.0467861	-1.4606e-05	84.1402
81	1.42942																	107	2.58562	1.78219	3.38905	0.836107	4.33513	0.0468436	-1.44107e-05	86.7024
82	1.46998																	108	2.63249	1.83377	3.43121	0.885131	4.37984	0.0468867	-1.4206e-05	89.3114
83	1.51097																	109	2.67939	1.88525	3.47353	0.934121	4.42466	0.0469156	-1.39922e-05	91.9674
84	1.55239																	110	2.72631	1.93661	3.51602	0.983059	4.46957	0.0469305	-1.3768e-05	94.6702
85	1.59421																	111	2.77325	1.98782	3.55867	1.03192	4.51457	0.0469316	-1.35377e-05	97.42
86	1.63643																	112	2.82017	2.03886	3.60149	1.0807	4.55964	0.0469192	-1.3295e-05	100.217
87	1.67902																	113	2.86708	2.0897	3.64446	1.12937	4.60479	0.0468935	-1.30496e-05	103.06
88	1.72197																	114	2.91395	2.14032	3.68759	1.17792	4.64999	0.0468547	-1.27971e-05	105.951
89	1.76527																	115	2.96078	2.19071	3.73086	1.22633	4.69524	0.0468032	-1.25394e-05	108.888
90	1.8089																	116	3.00756	2.24084	3.77428	1.27459	4.74052	0.0467391	-1.22726e-05	111.872
91	1.85284	3.33333																117	3.05426	2.29069	3.81783	1.32269	4.78583	0.0466627	-1.20046e-05	114.903
92	1.89708																	118	3.10088	2.34025	3.86151	1.3706	4.83115	0.0465744	-1.17322e-05	117.981
93	1.94159																	119	3.1474	2.38951	3.9053	1.41833	4.87648	0.0464743	-1.14534e-05	121.105
94	1.98638																	120	3.19382	2.43845	3.9492	1.46585	4.9218	0.0463627	-1.11753e-05	124.276
95	2.03142																	121	3.24013	2.48706	3.99319	1.51316	4.96709	0.04624	-1.08949e-05	127.493
96	2.07669																	122	3.2863	2.53533	4.03727	1.56025	5.01235	0.0461064	-1.06067e-05	130.756
97	2.12217																	123	3.33233	2.58325	4.08142	1.6071	5.05757	0.0459621	-1.032e-05	134.065
98	2.16786																	124	3.37822	2.63082	4.12562	1.65372	5.10272	0.0458076	-1.00336e-05	137.421
99	2.21374																	125	3.42395	2.67803	4.16986	1.70009	5.14781	0.045643	-9.74121e-06	140.822
100	2.25979																	126	3.4695	2.72487	4.21413	1.7462	5.19281	0.0454687	-9.4477e-06	144.268
101	2.30599																	127	3.51488	2.77135	4.25841	1.79205	5.23771	0.0452849	-9.1602e-06	147.761
102	2.35234																	128	3.56007	2.81745	4.30269	1.83764	5.2825	0.045092	-8.86745e-06	151.298
103	2.3988																	129	3.60506	2.86319	4.34694	1.88295	5.32718	0.0448902	-8.57958e-06	154.881
104	2.44538																	130	3.64985	2.90854	4.39115	1.92798	5.37172	0.0446798	-8.29246e-06	158.508
105	2.49205																	131	3.69442	2.95353	4.43531	1.97273	5.41611	0.0444612	-8.00685e-06	162.18
106	2.5388																	132	3.73877	2.99815	4.47939	2.01719	5.46034	0.0442345	-7.71974e-06	165.897
107	2.58562																	133	3.78289	3.04239	4.52338	2.06136	5.50441	0.0440001	-7.43074e-06	169.658
108	2.63249																	134	3.82677	3.08627	4.56726	2.10524	5.54829	0.0437583	-7.15153e-06	173.463
109	2.67939																	135	3.8704	3.12979	4.61101	2.14883	5.59197	0.0435093	-6.87081e-06	177.311
110	2.72631																	136	3.91378	3.17294	4.65462	2.19211	5.63545	0.0432535	-6.59009e-06	181.203
111	2.77325																	137	3.9569	3.21574	4.69807	2.2351	5.67871	0.042991	-6.31803e-06	185.139
112	2.82017																	138	3.99976	3.25819	4.74133	2.27778	5.72175	0.0427223	-6.04935e-06	189.117
113	2.86708																	139	4.04235	3.30029	4.7844	2.32015	5.76454	0.0424475	-5.78218e-06	193.138
114	2.91395																	140	4.08465	3.34205	4.82726	2.36222	5.80708	0.0421669	-5.51727e-06	197.202
115	2.96078																	141	4.12668	3.38347	4.86989	2.40399	5.84937	0.0418808	-5.25386e-06	201.307
116	3.00756	3.33333																142	4.16841	3.42456	4.91227	2.44544	5.89138	0.0415894	-4.99572e-06	205.455
117	3.05426																	143	4.20986	3.46532	4.95439	2.48659	5.93312	0.041293	-4.73984e-06	209.644
118	3.10088																	144	4.251	3.50576	4.99624	2.52743	5.97457	0.0409919	-4.49374e-06	213.874
119	3.1474																	145	4.29184	3.54588	5.0378	2.56796	6.01572	0.0406864	-4.24463e-06	218.146
120	3.19382																	146	4.33237	3.58569	5.07905	2.60818	6.05656	0.0403765	-4.0038e-06	222.458
121	3.24013																	147	4.37259	3.62519	5.11999	2.64809	6.09709	0.0400627	-3.76899e-06	226.811
122	3.2863																	148	4.41249	3.66439	5.1606	2.68769	6.1373	0.0397451	-3.5387e-06	231.203
123	3.33233																	149	4.45208	3.70329	5.20087	2.72697	6.17718	0.0394239	-3.30765e-06	235.635
124	3.37822																	150	4.49134	3.7419	5.24078	2.76595	6.21673	0.0390995	-3.08489e-06	240.107
125	3.42395																	151	4.53028	3.78022	5.28034	2.80462	6.25593	0.0387719	-2.86437e-06	244.618
126	3.4695																	152	4.56888	3.81825	5.31951	2.84298	6.29479	0.0384416	-2.64763e-06	249.168
127	3.51488																	153	4.60716	3.85601	5.35831	2.88103	6.33329	0.0381085	-2.43841e-06	253.756
128	3.56007																	154	4.6451	3.89349	5.39671	2.91877	6.37143	0.037773	-2.2337e-06	258.382
129	3.60506																	155	4.6827	3.93069	5.43472	2.9562	6.40921	0.0374353	-2.03351e-06	263.046
130	3.64985																	156	4.71997	3.96763	5.47231	2.99332	6.44662	0.0370955	-1.84009e-06	267.747
131	3.69442																	157	4.75689	4.0043	5.50949	3.03013	6.48365	0.0367539	-1.65195e-06	272.486
132	3.73877																	158	4.79348	4.04071	5.54625	3.06664	6.52031	0.0364107	-1.4638e-06	277.261
133	3.78289																	159	4.82972	4.07685	5.58258	3.10284	6.55659	0.036066	-1.28618e-06	282.072
134	3.82677																	160	4.86561	4.11274	5.61847	3.13873	6.59249	0.03572	-1.10631e-06	286.92
135	3.8704																	161	4.90116	4.14838	5.65393	3.17431	6.628	0.0353729	-9.34722e-07	291.804
136	3.91378																	162	4.93635	4.18376	5.68895	3.20959	6.66312	0.0350248	-7.69152e-07	296.722
137	3.9569																	163	4.9712	4.21888	5.72352	3.24456	6.69784	0.034676	-6.05839e-07	301.676
138	3.99976																	164	5.00571	4.25376	5.75765	3.27923	6.73218	0.0343266	-4.50804e-07	306.665
139	4.04235																	165	5.03986	4.2884	5.79132	3.31359	6.76612	0.0339767	-2.98027e-07	311.687
140	4.08465																	166	5.07366	4.32278	5.82454	3.34765	6.79967	0.0336266	-1.48261e-07	316.744
141	4.12668	3.33333																167	5.10711	4.35692	5.8573	3.3814	6.83282	0.0332763	-8.27854e-09	321.835
142	4.16841																	168	5.14021	4.39082	5.88961	3.41484	6.86558	0.0329259	1.28694e-07	326.958
143	4.20986																	169	5.17296	4.42447	5.92145	3.44799	6.89794	0.0325758	2.64161e-07	332.115
144	4.251																	170	5.20536	4.45788	5.95285	3.48083	6.9299	0.0322258	3.95112e-07	337.304
145	4.29184																	171	5.23741	4.49105	5.98378	3.51336	6.96147	0.0318763	5.21548e-07	342.526
146	4.33237																	172	5.26912	4.52398	6.01425	3.54559	6.99264	0.0315273	6.39705e-07	347.779
147	4.37259																	173	5.30047	4.55667	6.04427	3.57752	7.02342	0.0311789	7.57863e-07	353.064
148	4.41249																	174	5.33147	4.58912	6.07383	3.60915	7.0538	0.0308313	8.72257e-07	358.38
149	4.45208																	175	5.36213	4.62132	6.10294	3.64048	7.08379	0.0304846	9.81383e-07	363.726
150	4.49134																	176	5.39244	4.65329	6.1316	3.6715	7.11339	0.0301388	1.08374e-06	369.104
151	4.53028																	177	5.42241	4.68502	6.1598	3.70222	7.1426	0.0297941	1.18308e-06	374.511
152	4.56888																	178	5.45203	4.71651	6.18756	3.73264	7.17142	0.0294506	1.28393e-06	379.948
153	4.60716																	179	5.48131	4.74775	6.21487	3.76276	7.19986	0.0291084	1.37123e-06	385.415
154	4.6451																	180	5.51025	4.77876	6.24174	3.79258	7.22792	0.0287676	1.46003e-06	390.911
155	4.6827																	181	5.53885	4.80952	6.26817	3.8221	7.25559	0.0284282	1.54432e-06	396.436
156	4.71997																	182	5.56711	4.84005	6.29416	3.85132	7.28289	0.0280904	1.62485e-06	401.989
157	4.75689																	183	5.59503	4.87033	6.31973	3.88024	7.30981	0.0277542	1.70538e-06	407.57
158	4.79348																	184	5.62262	4.90037	6.34486	3.90887	7.33637	0.0274197	1.7844e-06	413.179
159	4.82972																	185	5.64987	4.93017	6.36957	3.93719	7.36255	0.0270869	1.84988e-06	418.815
160	4.86561																	186	5.67679	4.95972	6.39386	3.96521	7.38837	0.0267561	1.91836e-06	424.478
161	4.90116																	187	5.70338	4.98903	6.41774	3.99294	7.41382	0.0264271	1.98384e-06	430.168
162	4.93635																	188	5.72964	5.01809	6.4412	4.02037	7.43892	0.0261001	2.04329e-06	435.885
163	4.9712																	189	5.75558	5.04691	6.46426	4.04751	7.46366	0.0257752	2.10275e-06	441.627
164	5.00571																	190	5.7812	5.07548	6.48691	4.07435	7.48805	0.0254524	2.15769e-06	447.396
165	5.03986																	191	5.80649	5.1038	6.50918	4.10089	7.51209	0.0251317	2.20962e-06	453.19
166	5.07366	3.33333																192	5.83146	5.13187	6.53105	4.12714	7.53578	0.0248133	2.25929e-06	459.009
167	5.10711																	193	5.85612	5.1597	6.55253	4.15309	7.55914	0.0244971	2.30896e-06	464.853
168	5.14021																	194	5.88046	5.18728	6.57364	4.17875	7.58216	0.0241832	2.3496e-06	470.721
169	5.17296																	195	5.90448	5.2146	6.59437	4.20412	7.60485	0.0238716	2.38949e-06	476.613
170	5.20536																	196	5.9282	5.24167	6.61473	4.22919	7.62721	0.0235625	2.42787e-06	482.53
171	5.23741																	197	5.95161	5.26849	6.63473	4.25398	7.64924	0.0232558	2.46174e-06	488.47
172	5.26912																	198	5.97471	5.29506	6.65437	4.27847	7.67095	0.0229515	2.49485e-06	494.433
173	5.30047																	199	5.99751	5.32137	6.67366	4.30268	7.69235	0.0226497	2.52797e-06	500.419
174	5.33147																	200	6.02001	5.34742	6.6926	4.32659	7.71343	0.0223505	2.55732e-06	506.428
175	5.36213																	201	6.04221	5.37322	6.7112	4.35022	7.73421	0.0220538	2.58366e-06	512.459
176	5.39244																	202	6.06412	5.39877	6.72947	4.37356	7.75468	0.0217597	2.6115e-06	518.512
177	5.42241																	203	6.08573	5.42405	6.74742	4.39661	7.77485	0.0214683	2.63258e-06	524.587
178	5.45203																	204	6.10706	5.44908	6.76504	4.41938	7.79473	0.0211794	2.65214e-06	530.683
179	5.48131																	205	6.12809	5.47384	6.78235	4.44187	7.81432	0.0208932	2.67171e-06	536.801
180	5.51025																	206	6.14885	5.49835	6.79934	4.46408	7.83362	0.0206097	2.68676e-06	542.94
181	5.53885																	207	6.16931	5.52259	6.81604	4.486	7.85263	0.0203288	2.6988e-06	549.099
182	5.56711																	208	6.1895	5.54657	6.83244	4.50764	7.87137	0.0200507	2.71461e-06	555.278
183	5.59503																	209	6.20942	5.57029	6.84854	4.529	7.88983	0.0197753	2.7274e-06	561.478
184	5.62262																	210	6.22906	5.59374	6.86437	4.55009	7.90802	0.0195025	2.73643e-06	567.697
185	5.64987																	211	6.24842	5.61693	6.87991	4.5709	7.92594	0.0192326	2.74471e-06	573.936
186	5.67679																	212	6.26752	5.63986	6.89518	4.59144	7.94361	0.0189653	2.74848e-06	580.194
187	5.70338																	213	6.28635	5.66252	6.91019	4.6117	7.96101	0.0187009	2.756e-06	586.471
188	5.72964																	214	6.30492	5.68491	6.92494	4.63169	7.97816	0.0184391	2.7545e-06	592.766
189	5.75558																	215	6.32323	5.70703	6.93943	4.65141	7.99506	0.0181802	2.75901e-06	599.08
190	5.7812																	216	6.34129	5.72889	6.95368	4.67086	8.01171	0.017924	2.75675e-06	605.413
191	5.80649	7.03778																217	6.35908	5.75048	6.96768	4.69004	8.02812	0.0176705	2.75675e-06	611.763
192	5.83146																	218	6.37663	5.7718	6.98145	4.70896	8.0443	0.0174198	2.75901e-06	618.131
193	5.85612																	219	6.39392	5.79285	6.99499	4.72761	8.06023	0.0171719	2.75374e-06	624.516
194	5.88046																	220	6.41097	5.81363	7.00831	4.746	8.07594	0.0169267	2.74848e-06	630.918
195	5.90448																	221	6.42778	5.83414	7.02141	4.76414	8.09142	0.0166843	2.74321e-06	637.338
196	5.9282																	222	6.44434	5.85439	7.0343	4.78201	8.10667	0.0164446	2.7402e-06	643.774
197	5.95161																	223	6.46067	5.87436	7.04698	4.79962	8.12171	0.0162076	2.72891e-06	650.226
198	5.97471																	224	6.47676	5.89405	7.05946	4.81699	8.13653	0.0159734	2.72514e-06	656.695
199	5.99751																	225	6.49261	5.91348	7.07175	4.83409	8.15114	0.0157419	2.71611e-06	663.18
200	6.02001																	226	6.50824	5.93264	7.08384	4.85095	8.16554	0.0155131	2.70257e-06	669.68
201	6.04221																	227	6.52364	5.95152	7.09576	4.86756	8.17973	0.015287	2.69354e-06	676.196
202	6.06412																	228	6.53882	5.97014	7.1075	4.88392	8.19372	0.0150637	2.68149e-06	682.728
203	6.08573																	229	6.55377	5.98848	7.11906	4.90003	8.20751	0.014843	2.67096e-06	689.274
204	6.10706																	230	6.5685	6.00655	7.13046	4.9159	8.22111	0.0146249	2.65515e-06	695.835
205	6.12809																	231	6.58302	6.02435	7.14169	4.93153	8.23451	0.0144095	2.64161e-06	702.411
206	6.14885																	232	6.59732	6.04188	7.15277	4.94692	8.24772	0.0141968	2.63032e-06	709.001
207	6.16931																	233	6.61142	6.05914	7.1637	4.96208	8.26075	0.0139867	2.61451e-06	715.605
208	6.1895																	234	6.6253	6.07612	7.17447	4.977	8.2736	0.0137792	2.5972e-06	722.224
209	6.20942																	235	6.63897	6.09284	7.18511	4.99168	8.28627	0.0135743	2.57989e-06	728.856
210	6.22906																	236	6.65245	6.10928	7.19561	5.00614	8.29875	0.013372	2.56334e-06	735.502
211	6.24842																	237	6.66572	6.12546	7.20598	5.02037	8.31107	0.0131722	2.54603e-06	742.161
212	6.26752																	238	6.67879	6.14137	7.21621	5.03437	8.32322	0.012975	2.53022e-06	748.833
213	6.28635																	239	6.69167	6.15701	7.22633	5.04815	8.33519	0.0127804	2.50765e-06	755.518
214	6.30492																	240	6.70435	6.17239	7.23632	5.06171	8.347	0.0125882	2.49109e-06	762.216
215	6.32323																	241	6.71685	6.18749	7.2462	5.07504	8.35865	0.0123985	2.47528e-06	768.927
216	6.34129	7.03778																242	6.72915	6.20233	7.25597	5.08817	8.37014	0.0122113	2.45346e-06	775.65
217	6.35908																	243	6.74127	6.21691	7.26563	5.10107	8.38147	0.0120266	2.4369e-06	782.385
218	6.37663																	244	6.75321	6.23123	7.27519	5.11377	8.39265	0.0118443	2.41658e-06	789.132
219	6.39392																	245	6.76496	6.24528	7.28464	5.12625	8.40367	0.0116644	2.39325e-06	795.891
220	6.41097																	246	6.77654	6.25907	7.294	5.13853	8.41455	0.0114869	2.37444e-06	802.662
221	6.42778																	247	6.78793	6.2726	7.30327	5.1506	8.42527	0.0113117	2.35261e-06	809.444
222	6.44434																	248	6.79916	6.28587	7.31245	5.16247	8.43585	0.011139	2.33079e-06	816.238
223	6.46067																	249	6.81021	6.29889	7.32154	5.17413	8.44629	0.0109685	2.31047e-06	823.043
224	6.47676																	250	6.8211	6.31165	7.33055	5.1856	8.45659	0.0108004	2.2909e-06	829.858
225	6.49261																	251	6.83182	6.32416	7.33947	5.19688	8.46675	0.0106346	2.26907e-06	836.685
226	6.50824																	252	6.84237	6.33641	7.34832	5.20796	8.47678	0.010471	2.24574e-06	843.522
227	6.52364																	253	6.85276	6.34842	7.35709	5.21885	8.48667	0.0103097	2.22316e-06	850.37
228	6.53882																	254	6.86299	6.36018	7.3658	5.22955	8.49643	0.0101506	2.20134e-06	857.227
229	6.55377																	255	6.87306	6.37169	7.37443	5.24007	8.50605	0.00999367	2.17951e-06	864.095
230	6.5685																	256	6.88298	6.38296	7.38299	5.2504	8.51556	0.00983895	2.15919e-06	870.974
231	6.58302																	257	6.89274	6.39399	7.39149	5.26055	8.52493	0.0096864	2.13285e-06	877.861
232	6.59732																	258	6.90235	6.40478	7.39992	5.27052	8.53418	0.00953598	2.11479e-06	884.759
233	6.61142																	259	6.91181	6.41533	7.40829	5.28031	8.54331	0.00938768	2.09598e-06	891.666
234	6.6253																	260	6.92113	6.42565	7.4166	5.28993	8.55232	0.00924147	2.07189e-06	898.583
235	6.63897																	261	6.93029	6.43573	7.42486	5.29938	8.56121	0.00909733	2.04706e-06	905.508
236	6.65245																	262	6.93932	6.44559	7.43305	5.30865	8.56999	0.00895524	2.02147e-06	912.443
237	6.66572																	263	6.94821	6.45522	7.44119	5.31777	8.57865	0.00881517	2.00341e-06	919.387
238	6.67879																	264	6.95695	6.46463	7.44928	5.32671	8.58719	0.0086771	1.98008e-06	926.339
239	6.69167																	265	6.96556	6.47381	7.45731	5.33549	8.59563	0.00854102	1.95524e-06	933.301
240	6.70435																	266	6.97403	6.48278	7.46529	5.34412	8.60395	0.0084069	1.93567e-06	940.27
241	6.71685	7.03778																267	6.98238	6.49153	7.47322	5.35258	8.61217	0.00827471	1.91084e-06	947.249
242	6.72915																	268	6.99058	6.50007	7.4811	5.36089	8.62028	0.00814443	1.89202e-06	954.235
243	6.74127																	269	6.99866	6.5084	7.48893	5.36904	8.62829	0.00801605	1.86944e-06	961.23
244	6.75321																	270	7.00662	6.51652	7.49671	5.37705	8.63619	0.00788954	1.84912e-06	968.232
245	6.76496																	271	7.01444	6.52444	7.50445	5.3849	8.64399	0.00776487	1.82504e-06	975.243
246	6.77654																	272	7.02215	6.53216	7.51214	5.39261	8.65168	0.00764203	1.80246e-06	982.261
247	6.78793																	273	7.02973	6.53968	7.51978	5.40017	8.65928	0.007521	1.78139e-06	989.287
248	6.79916																	274	7.03719	6.54701	7.52737	5.4076	8.66678	0.00740175	1.75957e-06	996.321
249	6.81021																	275	7.04453	6.55415	7.53492	5.41488	8.67419	0.00728425	1.73548e-06	1003.36
250	6.8211																	276	7.05176	6.5611	7.54242	5.42202	8.6815	0.0071685	1.71817e-06	1010.41
251	6.83182																	277	7.05887	6.56787	7.54987	5.42903	8.68871	0.00705446	1.69484e-06	1017.47
252	6.84237																	278	7.06587	6.57445	7.55728	5.4359	8.69584	0.00694212	1.67603e-06	1024.53
253	6.85276																	279	7.07276	6.58086	7.56465	5.44264	8.70287	0.00683145	1.65646e-06	1031.6
254	6.86299																	280	7.07953	6.5871	7.57197	5.44926	8.70981	0.00672244	1.63087e-06	1038.67
255	6.87306																	281	7.0862	6.59316	7.57924	5.45574	8.71666	0.00661506	1.61206e-06	1045.76
256	6.88298																	282	7.09276	6.59906	7.58647	5.4621	8.72342	0.00650929	1.58948e-06	1052.85
257	6.89274																	283	7.09922	6.60479	7.59365	5.46834	8.7301	0.00640511	1.57292e-06	1059.94
258	6.90235																	284	7.10557	6.61036	7.60079	5.47446	8.73669	0.0063025	1.5526e-06	1067.04
259	6.91181																	285	7.11183	6.61577	7.60788	5.48045	8.7432	0.00620144	1.52626e-06	1074.15
260	6.92113																	286	7.11798	6.62103	7.61493	5.48633	8.74962	0.00610192	1.51196e-06	1081.27
261	6.93029																	287	7.12403	6.62614	7.62192	5.4921	8.75596	0.0060039	1.49164e-06	1088.39
262	6.93932																	288	7.12999	6.63109	7.62888	5.49775	8.76222	0.00590737	1.47132e-06	1095.52
263	6.94821																	289	7.13584	6.63591	7.63578	5.50329	8.7684	0.00581231	1.45175e-06	1102.65
264	6.95695																	290	7.14161	6.64058	7.64264	5.50872	8.7745	0.0057187	1.42918e-06	1109.79
265	6.96556																	291	7.14728	6.64511	7.64945	5.51404	8.78052	0.00562652	1.41036e-06	1116.93
266	6.97403	7.03778																292	7.15286	6.64951	7.65622	5.51926	8.78647	0.00553576	1.39155e-06	1124.08
267	6.98238																	293	7.15835	6.65378	7.66293	5.52437	8.79234	0.00544638	1.37574e-06	1131.24
268	6.99058																	294	7.16376	6.65791	7.6696	5.52938	8.79813	0.00535838	1.35768e-06	1138.4
269	6.99866																	295	7.16907	6.66192	7.67622	5.53429	8.80385	0.00527174	1.33811e-06	1145.56
270	7.00662																	296	7.1743	6.66581	7.68279	5.53911	8.8095	0.00518643	1.31629e-06	1152.74
271	7.01444																	297	7.17945	6.66957	7.68932	5.54382	8.81507	0.00510244	1.29973e-06	1159.91
272	7.02215																	298	7.18451	6.67322	7.69579	5.54844	8.82057	0.00501974	1.28167e-06	1167.1
273	7.02973																	299	7.18949	6.67676	7.70221	5.55297	8.826	0.00493833	1.26737e-06	1174.28
274	7.03719																	300	7.19438	6.68018	7.70859	5.5574	8.83137	0.00485818	1.24479e-06	1181.47
275	7.04453																	301	7.1992	6.68349	7.71491	5.56175	8.83666	0.00477928	1.22899e-06	1188.67
276	7.05176																	302	7.20394	6.6867	7.72119	5.566	8.84188	0.00470161	1.21469e-06	1195.87
277	7.05887																	303	7.20861	6.6898	7.72741	5.57017	8.84704	0.00462514	1.19286e-06	1203.08
278	7.06587																	304	7.21319	6.6928	7.73359	5.57426	8.85213	0.00454988	1.18007e-06	1210.29
279	7.07276																	305	7.21771	6.6957	7.73971	5.57826	8.85715	0.00447578	1.16125e-06	1217.51
280	7.07953																	306	7.22215	6.69851	7.74578	5.58218	8.86211	0.00440285	1.14545e-06	1224.73
281	7.0862																	307	7.22651	6.70122	7.7518	5.58601	8.86701	0.00433106	1.12739e-06	1231.95
282	7.09276																	308	7.23081	6.70384	7.75777	5.58977	8.87184	0.0042604	1.11158e-06	1239.18
283	7.09922																	309	7.23503	6.70637	7.76369	5.59345	8.87661	0.00419085	1.09879e-06	1246.41
284	7.10557																	310	7.23919	6.70882	7.76956	5.59706	8.88132	0.00412239	1.07696e-06	1253.65
285	7.11183																	311	7.24328	6.71118	7.77538	5.60059	8.88597	0.00405501	1.06116e-06	1260.89
286	7.11798																	312	7.2473	6.71346	7.78114	5.60405	8.89055	0.0039887	1.04611e-06	1268.13
287	7.12403																	313	7.25126	6.71566	7.78685	5.60743	8.89508	0.00392343	1.03105e-06	1275.38
288	7.12999																	314	7.25515	6.71778	7.79251	5.61074	8.89955	0.0038592	1.01374e-06	1282.64
289	7.13584																	315	7.25897	6.71983	7.79812	5.61399	8.90396	0.00379598	1.00095e-06	1289.89
290	7.14161																	316	7.26274	6.72181	7.80367	5.61717	8.90831	0.00373377	9.87404e-07	1297.16
291	7.14728	7.03778																317	7.26644	6.72371	7.80918	5.62028	8.91261	0.00367254	9.70847e-07	1304.42
292	7.15286																	318	7.27008	6.72554	7.81463	5.62332	8.91685	0.00361229	9.55042e-07	1311.69
293	7.15835																	319	7.27367	6.72731	7.82003	5.6263	8.92103	0.00355299	9.46011e-07	1318.96
294	7.16376																	320	7.27719	6.72901	7.82537	5.62922	8.92516	0.00349464	9.32465e-07	1326.24
295	7.16907																	321	7.28066	6.73065	7.83067	5.63208	8.92924	0.00343722	9.17413e-07	1333.51
296	7.1743																	322	7.28407	6.73222	7.83591	5.63487	8.93326	0.00338071	8.9935e-07	1340.8
297	7.17945																	323	7.28742	6.73374	7.8411	5.63761	8.93723	0.00332511	8.88814e-07	1348.08
298	7.18451																	324	7.29072	6.73519	7.84624	5.64029	8.94114	0.00327039	8.74515e-07	1355.37
299	7.18949																	325	7.29396	6.73659	7.85133	5.64291	8.94501	0.00321656	8.57958e-07	1362.66
300	7.19438																	326	7.29715	6.73794	7.85636	5.64548	8.94882	0.00316358	8.44411e-07	1369.96
301	7.1992																	327	7.30029	6.73923	7.86135	5.64799	8.95259	0.00311146	8.36885e-07	1377.26
302	7.20394																	328	7.30337	6.74046	7.86628	5.65045	8.9563	0.00306017	8.24844e-07	1384.56
303	7.20861																	329	7.30641	6.74165	7.87116	5.65285	8.95996	0.0030097	8.11297e-07	1391.86
304	7.21319																	330	7.30939	6.74279	7.87599	5.6552	8.96358	0.00296005	8.01513e-07	1399.17
305	7.21771																	331	7.31233	6.74388	7.88077	5.65751	8.96715	0.00291119	7.84204e-07	1406.48
306	7.22215																	332	7.31522	6.74493	7.8855	5.65976	8.97067	0.00286312	7.75172e-07	1413.8
307	7.22651																	333	7.31805	6.74593	7.89018	5.66197	8.97414	0.00281583	7.63883e-07	1421.11
308	7.23081																	334	7.32085	6.74689	7.89481	5.66412	8.97757	0.0027693	7.53347e-07	1428.43
309	7.23503																	335	7.32359	6.7478	7.89938	5.66624	8.98095	0.00272352	7.40553e-07	1435.76
310	7.23919																	336	7.32629	6.74868	7.90391	5.6683	8.98429	0.00267848	7.27759e-07	1443.08
311	7.24328																	337	7.32895	6.74951	7.90839	5.67032	8.98758	0.00263417	7.20233e-07	1450.41
312	7.2473																	338	7.33156	6.75031	7.91282	5.6723	8.99083	0.00259058	7.08944e-07	1457.74
313	7.25126																	339	7.33413	6.75107	7.9172	5.67423	8.99403	0.00254769	6.94645e-07	1465.07
314	7.25515																	340	7.33666	6.75179	7.92153	5.67612	8.99719	0.0025055	6.82603e-07	1472.41
315	7.25897																	341	7.33914	6.75248	7.92581	5.67798	9.00031	0.00246399	6.76582e-07	1479.74
316	7.26274	7.03778																342	7.34159	6.75313	7.93004	5.67979	9.00339	0.00242316	6.64541e-07	1487.08
317	7.26644																	343	7.34399	6.75375	7.93423	5.68156	9.00642	0.00238299	6.50994e-07	1494.43
318	7.27008																	344	7.34635	6.75434	7.93837	5.68329	9.00942	0.00234347	6.41211e-07	1501.77
319	7.27367																	345	7.34868	6.7549	7.94246	5.68498	9.01237	0.0023046	6.35942e-07	1509.12
320	7.27719																	346	7.35096	6.75543	7.9465	5.68664	9.01528	0.00226636	6.23148e-07	1516.47
321	7.28066																	347	7.35321	6.75592	7.9505	5.68826	9.01816	0.00222874	6.14117e-07	1523.82
322	7.28407																	348	7.35542	6.7564	7.95445	5.68985	9.02099	0.00219173	6.05086e-07	1531.18
323	7.28742																	349	7.35759	6.75684	7.95835	5.6914	9.02379	0.00215533	5.93797e-07	1538.53
324	7.29072																	350	7.35973	6.75726	7.96221	5.69291	9.02655	0.00211952	5.84766e-07	1545.89
325	7.29396																	351	7.36183	6.75765	7.96602	5.6944	9.02927	0.0020843	5.72724e-07	1553.25
326	7.29715																	352	7.3639	6.75802	7.96978	5.69585	9.03195	0.00204965	5.65951e-07	1560.62
327	7.30029																	353	7.36593	6.75836	7.97351	5.69727	9.0346	0.00201557	5.5391e-07	1567.98
328	7.30337																	354	7.36793	6.75868	7.97718	5.69865	9.03721	0.00198204	5.50147e-07	1575.35
329	7.30641																	355	7.3699	6.75898	7.98082	5.70001	9.03978	0.00194907	5.37353e-07	1582.72
330	7.30939																	356	7.37183	6.75925	7.9844	5.70134	9.04232	0.00191663	5.32837e-07	1590.09
331	7.31233																	357	7.37373	6.75951	7.98795	5.70263	9.04483	0.00188472	5.17785e-07	1597.46
332	7.31522																	358	7.3756	6.75975	7.99145	5.7039	9.0473	0.00185334	5.17032e-07	1604.83
333	7.31805																	359	7.37744	6.75996	7.99491	5.70514	9.04973	0.00182248	5.01228e-07	1612.21
334	7.32085																	360	7.37924	6.76016	7.99833	5.70635	9.05214	0.00179212	5.01228e-07	1619.59
335	7.32359																	361	7.38102	6.76034	8.0017	5.70754	9.05451	0.00176226	4.87681e-07	1626.97
336	7.32629																	362	7.38277	6.7605	8.00504	5.7087	9.05684	0.00173288	4.85423e-07	1634.35
337	7.32895																	363	7.38449	6.76065	8.00833	5.70983	9.05915	0.001704	4.71877e-07	1641.74
338	7.33156																	364	7.38618	6.76077	8.01158	5.71094	9.06142	0.00167558	4.67361e-07	1649.12
339	7.33413																	365	7.38784	6.76089	8.01479	5.71202	9.06366	0.00164764	4.64351e-07	1656.51
340	7.33666																	366	7.38947	6.76098	8.01796	5.71308	9.06587	0.00162015	4.5532e-07	1663.9
341	7.33914	7.03778																367	7.39108	6.76107	8.02109	5.71411	9.06805	0.00159312	4.44783e-07	1671.29
342	7.34159																	368	7.39266	6.76113	8.02418	5.71512	9.07019	0.00156653	4.34247e-07	1678.68
343	7.34399																	369	7.39421	6.76119	8.02724	5.71611	9.07231	0.00154038	4.32742e-07	1686.07
344	7.34635																	370	7.39574	6.76123	8.03025	5.71708	9.0744	0.00151466	4.22958e-07	1693.47
345	7.34868																	371	7.39724	6.76126	8.03323	5.71802	9.07646	0.00148937	4.16185e-07	1700.86
346	7.35096																	372	7.39872	6.76127	8.03616	5.71895	9.07849	0.00146449	4.12422e-07	1708.26
347	7.35321																	373	7.40017	6.76128	8.03906	5.71985	9.08049	0.00144002	4.06401e-07	1715.66
348	7.35542																	374	7.4016	6.76127	8.04192	5.72073	9.08247	0.00141596	4.02638e-07	1723.06
349	7.35759																	375	7.403	6.76126	8.04475	5.72159	9.08441	0.00139229	3.93607e-07	1730.46
350	7.35973																	376	7.40438	6.76123	8.04754	5.72243	9.08633	0.00136902	3.84576e-07	1737.87
351	7.36183																	377	7.40574	6.76119	8.05029	5.72326	9.08822	0.00134613	3.75545e-07	1745.27
352	7.3639																	378	7.40708	6.76114	8.05301	5.72406	9.09009	0.00132362	3.76297e-07	1752.68
353	7.36593																	379	7.40839	6.76108	8.05569	5.72485	9.09193	0.00130148	3.65761e-07	1760.09
354	7.36793																	380	7.40968	6.76102	8.05834	5.72562	9.09374	0.00127971	3.61245e-07	1767.5
355	7.3699																	381	7.41095	6.76094	8.06095	5.72637	9.09553	0.0012583	3.55977e-07	1774.91
356	7.37183																	382	7.4122	6.76086	8.06353	5.7271	9.09729	0.00123724	3.49204e-07	1782.32
357	7.37373																	383	7.41342	6.76077	8.06608	5.72782	9.09903	0.00121654	3.41678e-07	1789.73
358	7.3756																	384	7.41463	6.76067	8.06859	5.72852	9.10074	0.00119617	3.3942e-07	1797.14
359	7.37744																	385	7.41582	6.76056	8.07107	5.7292	9.10243	0.00117615	3.34152e-07	1804.56
360	7.37924																	386	7.41698	6.76045	8.07351	5.72987	9.10409	0.00115645	3.26626e-07	1811.98
361	7.38102																	387	7.41813	6.76033	8.07593	5.73053	9.10573	0.00113708	3.22863e-07	1819.39
362	7.38277																	388	7.41926	6.7602	8.07831	5.73116	9.10735	0.00111804	3.1609e-07	1826.81
363	7.38449																	389	7.42036	6.76007	8.08066	5.73179	9.10894	0.00109931	3.13832e-07	1834.23
364	7.38618																	390	7.42145	6.75993	8.08297	5.7324	9.11051	0.00108089	3.06306e-07	1841.65
365	7.38784																	391	7.42253	6.75979	8.08526	5.73299	9.11206	0.00106277	3.02543e-07	1849.08
366	7.38947	7.03778																392	7.42358	6.75964	8.08752	5.73358	9.11358	0.00104496	2.97275e-07	1856.5
367	7.39108																	393	7.42462	6.75949	8.08975	5.73414	9.11509	0.00102745	2.89749e-07	1863.92
368	7.39266																	394	7.42563	6.75933	8.09194	5.7347	9.11657	0.00101022	2.86739e-07	1871.35
369	7.39421																	395	7.42664	6.75916	8.09411	5.73524	9.11803	0.000993283	2.79965e-07	1878.77
370	7.39574																	396	7.42762	6.759	8.09625	5.73577	9.11947	0.000976627	2.76202e-07	1886.2
371	7.39724																	397	7.42859	6.75882	8.09836	5.73629	9.12089	0.000960248	2.73944e-07	1893.63
372	7.39872																	398	7.42954	6.75865	8.10044	5.73679	9.12229	0.000944141	2.67171e-07	1901.06
373	7.40017																	399	7.43048	6.75847	8.10249	5.73729	9.12367	0.000928302	2.62655e-07	1908.49
374	7.4016																	400	7.4314	6.75828	8.10451	5.73777	9.12503	0.000912727	2.59645e-07	1915.92
375	7.403																	401	7.4323	6.7581	8.10651	5.73824	9.12637	0.000897412	2.52119e-07	1923.35
376	7.40438																	402	7.43319	6.75791	8.10848	5.7387	9.12769	0.000882352	2.46851e-07	1930.78
377	7.40574																	403	7.43407	6.75772	8.11042	5.73915	9.12899	0.000867543	2.44593e-07	1938.22
378	7.40708																	404	7.43493	6.75752	8.11234	5.73959	9.13027	0.00085298	2.40078e-07	1945.65
379	7.40839																	405	7.43577	6.75732	8.11423	5.74002	9.13153	0.000838661	2.3782e-07	1953.09
380	7.40968																	406	7.43661	6.75712	8.11609	5.74043	9.13278	0.00082458	2.33304e-07	1960.52
381	7.41095																	407	7.43742	6.75692	8.11793	5.74084	9.13401	0.000810734	2.33304e-07	1967.96
382	7.4122																	408	7.43823	6.75671	8.11974	5.74124	9.13522	0.000797119	2.23521e-07	1975.4
383	7.41342																	409	7.43902	6.7565	8.12153	5.74163	9.13641	0.000783731	2.25778e-07	1982.84
384	7.41463																	410	7.4398	6.75629	8.1233	5.74201	9.13758	0.000770567	2.21263e-07	1990.28
385	7.41582																	411	7.44056	6.75608	8.12504	5.74238	9.13874	0.000757623	2.14489e-07	1997.72
386	7.41698																	412	7.44131	6.75587	8.12675	5.74274	9.13988	0.000744895	2.12984e-07	2005.16
387	7.41813																	413	7.44205	6.75566	8.12844	5.7431	9.141	0.000732379	2.09974e-07	2012.6
388	7.41926																	414	7.44278	6.75544	8.13011	5.74344	9.14211	0.000720072	2.01695e-07	2020.04
389	7.42036																	415	7.44349	6.75522	8.13175	5.74378	9.1432	0.000707971	2.01695e-07	2027.48
390	7.42145																	416	7.44419	6.75501	8.13338	5.74411	9.14427	0.000696073	1.99438e-07	2034.93
391	7.42253	7.03778																417	7.44488	6.75479	8.13498	5.74443	9.14533	0.000684373	1.94169e-07	2042.37
392	7.42358																	418	7.44556	6.75457	8.13655	5.74475	9.14638	0.000672868	1.94922e-07	2049.82
393	7.42462																	419	7.44623	6.75435	8.13811	5.74505	9.1474	0.000661557	1.91159e-07	2057.26
394	7.42563																	420	7.44688	6.75413	8.13964	5.74535	9.14842	0.000650434	1.81375e-07	2064.71
395	7.42664																	421	7.44753	6.7539	8.14115	5.74564	9.14941	0.000639497	1.80623e-07	2072.16
396	7.42762																	422	7.44816	6.75368	8.14264	5.74593	9.1504	0.000628744	1.79118e-07	2079.61
397	7.42859																	423	7.44879	6.75346	8.14411	5.74621	9.15137	0.00061817	1.71592e-07	2087.05
398	7.42954																	424	7.4494	6.75324	8.14556	5.74648	9.15232	0.000607773	1.72344e-07	2094.5
399	7.43048																	425	7.45	6.75301	8.14699	5.74674	9.15326	0.00059755	1.74602e-07	2101.95
400	7.4314																	426	7.45059	6.75279	8.1484	5.747	9.15419	0.000587499	1.70086e-07	2109.4
401	7.4323																	427	7.45118	6.75257	8.14979	5.74725	9.1551	0.000577615	1.64818e-07	2116.85
402	7.43319																	428	7.45175	6.75234	8.15116	5.7475	9.156	0.000567898	1.64818e-07	2124.31
403	7.43407																	429	7.45231	6.75212	8.15251	5.74774	9.15689	0.000558343	1.58797e-07	2131.76
404	7.43493																	430	7.45287	6.7519	8.15384	5.74797	9.15776	0.000548948	1.52777e-07	2139.21
405	7.43577																	431	7.45341	6.75167	8.15515	5.7482	9.15862	0.00053971	1.53529e-07	2146.66
406	7.43661																	432	7.45395	6.75145	8.15644	5.74842	9.15947	0.000530627	1.52777e-07	2154.12
407	7.43742																	433	7.45447	6.75123	8.15772	5.74864	9.1603	0.000521697	1.48261e-07	2161.57
408	7.43823																	434	7.45499	6.75101	8.15897	5.74885	9.16112	0.000512916	1.50519e-07	2169.03
409	7.43902																	435	7.4555	6.75078	8.16021	5.74906	9.16193	0.000504282	1.43746e-07	2176.48
410	7.4398																	436	7.456	6.75056	8.16143	5.74926	9.16273	0.000495793	1.39983e-07	2183.94
411	7.44056																	437	7.45649	6.75034	8.16264	5.74946	9.16352	0.000487447	1.4224e-07	2191.39
412	7.44131																	438	7.45697	6.75012	8.16382	5.74965	9.16429	0.00047924	1.38477e-07	2198.85
413	7.44205																	439	7.45745	6.7499	8.16499	5.74984	9.16505	0.000471171	1.37725e-07	2206.31
414	7.44278																	440	7.45792	6.74968	8.16615	5.75002	9.16581	0.000463238	1.35467e-07	2213.76
415	7.44349																	441	7.45837	6.74947	8.16728	5.7502	9.16655	0.000455437	1.33209e-07	2221.22
416	7.44419	8.14889																442	7.45883	6.74925	8.1684	5.75038	9.16728	0.000447768	1.28694e-07	2228.68
417	7.44488																	443	7.45927	6.74903	8.16951	5.75055	9.16799	0.000440227	1.26436e-07	2236.14
418	7.44556																	444	7.45971	6.74882	8.17059	5.75071	9.1687	0.000432813	1.24931e-07	2243.6
419	7.44623																	445	7.46014	6.7486	8.17167	5.75087	9.1694	0.000425523	1.2192e-07	2251.06
420	7.44688																	446	7.46056	6.74839	8.17272	5.75103	9.17008	0.000418355	1.19663e-07	2258.52
421	7.44753																	447	7.46097	6.74818	8.17377	5.75118	9.17076	0.000411308	1.1891e-07	2265.98
422	7.44816																	448	7.46138	6.74797	8.17479	5.75133	9.17143	0.000404379	1.16652e-07	2273.44
423	7.44879																	449	7.46178	6.74776	8.1758	5.75148	9.17208	0.000397567	1.15147e-07	2280.9
424	7.4494																	450	7.46218	6.74755	8.1768	5.75162	9.17273	0.000390869	1.16652e-07	2288.37
425	7.45																	451	7.46256	6.74734	8.17779	5.75176	9.17337	0.000384283	1.12889e-07	2295.83
426	7.45059																	452	7.46294	6.74713	8.17875	5.7519	9.17399	0.000377808	1.12137e-07	2303.29
427	7.45118																	453	7.46332	6.74693	8.17971	5.75203	9.17461	0.000371442	1.06116e-07	2310.75
428	7.45175																	454	7.46369	6.74672	8.18065	5.75216	9.17522	0.000365183	1.06116e-07	2318.22
429	7.45231																	455	7.46405	6.74652	8.18158	5.75228	9.17582	0.000359029	1.03858e-07	2325.68
430	7.45287																	456	7.46441	6.74632	8.18249	5.7524	9.17641	0.000352978	1.00848e-07	2333.15
431	7.45341																	457	7.46476	6.74612	8.18339	5.75252	9.17699	0.00034703	1.00095e-07	2340.61
432	7.45395																	458	7.4651	6.74592	8.18428	5.75264	9.17756	0.000341181	9.55795e-08	2348.07
433	7.45447																	459	7.46544	6.74572	8.18516	5.75275	9.17812	0.00033543	9.63321e-08	2355.54
434	7.45499																	460	7.46577	6.74552	8.18602	5.75286	9.17868	0.000329776	9.40743e-08	2363.01
435	7.4555																	461	7.4661	6.74533	8.18687	5.75297	9.17923	0.000324217	9.48269e-08	2370.47
436	7.456																	462	7.46642	6.74513	8.1877	5.75307	9.17976	0.000318752	9.10639e-08	2377.94
437	7.45649																	463	7.46673	6.74494	8.18853	5.75317	9.18029	0.000313378	9.03113e-08	2385.4
438	7.45697																	464	7.46705	6.74475	8.18934	5.75327	9.18082	0.000308095	9.10639e-08	2392.87
439	7.45745																	465	7.46735	6.74456	8.19014	5.75337	9.18133	0.000302901	8.95588e-08	2400.34
440	7.45792																	466	7.46765	6.74437	8.19093	5.75346	9.18184	0.000297794	8.57958e-08	2407.81
441	7.45837																	467	7.46795	6.74418	8.19171	5.75356	9.18234	0.000292773	8.50432e-08	2415.27
442	7.45883																	468	7.46824	6.744	8.19248	5.75364	9.18283	0.000287837	7.82698e-08	2422.74
443	7.45927																	469	7.46852	6.74381	8.19323	5.75373	9.18331	0.000282983	8.05276e-08	2430.21
444	7.45971																	470	7.4688	6.74363	8.19398	5.75382	9.18379	0.000278211	8.12802e-08	2437.68
445	7.46014																	471	7.46908	6.74345	8.19471	5.7539	9.18426	0.00027352	7.75172e-08	2445.15
446	7.46056																	472	7.46935	6.74327	8.19543	5.75398	9.18472	0.000268907	8.27854e-08	2452.62
447	7.46097																	473	7.46962	6.74309	8.19614	5.75406	9.18518	0.000264372	7.37543e-08	2460.09
448	7.46138																	474	7.46988	6.74291	8.19685	5.75413	9.18562	0.000259913	7.52595e-08	2467.56
449	7.46178																	475	7.47014	6.74274	8.19754	5.75421	9.18607	0.00025553	7.75172e-08	2475.03
450	7.46218																	476	7.47039	6.74256	8.19822	5.75428	9.1865	0.00025122	7.45069e-08	2482.5
451	7.46256																	477	7.47064	6.74239	8.19889	5.75435	9.18693	0.000246983	7.14965e-08	2489.97
452	7.46294																	478	7.47088	6.74222	8.19955	5.75442	9.18735	0.000242817	6.92387e-08	2497.44
453	7.46332																	479	7.47112	6.74205	8.2002	5.75448	9.18776	0.000238721	6.77335e-08	2504.91
454	7.46369																	480	7.47136	6.74188	8.20084	5.75455	9.18817	0.000234694	6.84861e-08	2512.38
455	7.46405																	481	7.47159	6.74171	8.20148	5.75461	9.18858	0.000230735	6.77335e-08	2519.85
456	7.46441																	482	7.47182	6.74155	8.2021	5.75467	9.18897	0.000226843	6.62283e-08	2527.32
457	7.46476																	483	7.47205	6.74138	8.20271	5.75473	9.18936	0.000223016	6.54757e-08	2534.8
458	7.4651																	484	7.47227	6.74122	8.20332	5.75479	9.18975	0.000219254	6.54757e-08	2542.27
459	7.46544																	485	7.47249	6.74106	8.20391	5.75485	9.19013	0.000215555	5.87024e-08	2549.74
460	7.46577																	486	7.4727	6.7409	8.2045	5.7549	9.1905	0.000211918	5.87024e-08	2557.21
461	7.4661																	487	7.47291	6.74074	8.20508	5.75495	9.19087	0.000208342	6.09602e-08	2564.69
462	7.46642																	488	7.47312	6.74059	8.20565	5.75501	9.19123	0.000204827	5.79498e-08	2572.16
463	7.46673																	489	7.47332	6.74043	8.20621	5.75506	9.19158	0.000201371	6.17128e-08	2579.63
464	7.46705																	490	7.47352	6.74028	8.20676	5.75511	9.19193	0.000197973	5.64446e-08	2587.1
465	7.46735																	491	7.47372	6.74012	8.20731	5.75515	9.19228	0.000194633	6.02076e-08	2594.58
466	7.46765																	492	7.47391	6.73997	8.20784	5.7552	9.19262	0.000191349	5.41868e-08	2602.05
467	7.46795																	493	7.4741	6.73982	8.20837	5.75524	9.19295	0.00018812	5.41868e-08	2609.53
468	7.46824																	494	7.47428	6.73968	8.20889	5.75529	9.19328	0.000184945	5.34342e-08	2617
469	7.46852																	495	7.47447	6.73953	8.20941	5.75533	9.19361	0.000181824	5.26816e-08	2624.47
470	7.4688																	496	7.47465	6.73938	8.20991	5.75537	9.19393	0.000178756	5.34342e-08	2631.95
471	7.46908																	497	7.47483	6.73924	8.21041	5.75541	9.19424	0.000175739	5.34342e-08	2639.42
472	7.46935																	498	7.475	6.7391	8.2109	5.75545	9.19455	0.000172773	4.74135e-08	2646.9
473	7.46962																	499	7.47517	6.73896	8.21138	5.75549	9.19485	0.000169857	4.74135e-08	2654.37
474	7.46988																	500	7.47534	6.73882	8.21186	5.75552	9.19515	0.00016699	4.59083e-08	2661.85
475	7.47014
476	7.47039
477	7.47064
478	7.47088
479	7.47112
480	7.47136
481	7.47159
482	7.47182
483	7.47205
484	7.47227
485	7.47249
486	7.4727
487	7.47291
488	7.47312
489	7.47332
490	7.47352
491	7.47372
492	7.47391
493	7.4741
494	7.47428
495	7.47447
496	7.47465
497	7.47483
498	7.475
499	7.47517
500	7.47534

## Sheet: Gompertz 6
T6
Gompertz M(a,b,c)	Parameters	Std Error	T Value	95% Conf Lim	95% Conf Lim	X Observed	Y Observed	Y Predicted	Y Residual	Y Residual%	95% Conf Lim	95% Conf Lim	95% Pred Lim	95% Pred Lim	First Deriv	Second Deriv	Area	X Generated	Y Predicted	95% Conf Lim	95% Conf Lim	95% Pred Lim	95% Pred Lim	First Deriv	Second Deriv	Area
8001	4.50081	0.14219	31.6535	4.20208	4.79954	0	0	0.00125231	-0.00125231	0	-0.0100586	0.0125632	-0.873821	0.876326	0.000348936	1.75676e-05	0	0	0.00125231	-0.0100586	0.0125632	-0.873821	0.876326	0.000348936	1.75676e-05	0
0.965331	0.0563571	0.0118952	4.7378	0.0313662	0.081348	4	0	0.00355015	-0.00355015	0	-0.0229306	0.0300309	-0.871851	0.878951	0.000863293	3.06145e-05	0.00892376	1	0.00164696	-0.0125371	0.015831	-0.873468	0.876762	0.000443545	2.04872e-05	0.00144176
0.959213	32.3959	8.96604	3.61318	13.559	51.2329	8	0	0.00881425	-0.00881425	0	-0.0453353	0.0629638	-0.86786	0.885488	0.00187057	4.58818e-05	0.032315	2	0.00214623	-0.0154757	0.0197682	-0.873031	0.877324	0.000558662	2.36522e-05	0.00332877
0.416484						12	0	0.0194921	-0.0194921	0	-0.0788485	0.117833	-0.861017	0.900001	0.00361015	5.97523e-05	0.0866132	3	0.00277218	-0.0189242	0.0244686	-0.872497	0.878041	0.00069745	2.70388e-05	0.00577641
250.595						16.0764	0	0.0394475	-0.0394475	0	-0.122859	0.201754	-0.850479	0.929374	0.00635967	6.79795e-05	0.202939	4	0.00355015	-0.0229306	0.0300309	-0.871851	0.878951	0.000863293	3.06145e-05	0.00892376
						20.0764	0	0.0720871	-0.0720871	0	-0.16992	0.314095	-0.835764	0.979938	0.0101426	6.6831e-05	0.420964	5	0.00450897	-0.0275394	0.0365574	-0.871078	0.880096	0.00105976	3.43386e-05	0.0129369
						24.0764	0	0.122003	-0.122003	0	-0.211031	0.455038	-0.814233	1.05824	0.014981	5.54151e-05	0.80269	6	0.00568112	-0.0327898	0.0441521	-0.870164	0.881527	0.00129058	3.81626e-05	0.0180128
						49.0764	1.11111	0.964113	0.146998	13.2298	0.288482	1.63975	-0.141374	2.0696	0.0505572	-7.31022e-05	12.4471	7	0.00710285	-0.038714	0.0529197	-0.869096	0.883302	0.00155956	4.20308e-05	0.0243823
						74.0764	2.22222	2.33088	-0.108662	-4.88977	1.76469	2.89708	1.28867	3.37309	0.0521988	-3.27121e-05	53.5753	8	0.00881425	-0.0453353	0.0629638	-0.86786	0.885488	0.00187057	4.58818e-05	0.032315
						99.0764	3.33333	3.39821	-0.0648801	-1.9464	2.85028	3.94615	2.36581	4.43062	0.0324994	8.88249e-06	126.238	9	0.0108593	-0.0526663	0.0743849	-0.866444	0.888162	0.00222746	4.96493e-05	0.042122
						124.076	4.25944	3.99183	0.26761	6.28274	3.57043	4.41323	3.02065	4.96302	0.0163035	1.23575e-05	219.458	10	0.0132857	-0.0607072	0.0872786	-0.864837	0.891409	0.00263398	5.3264e-05	0.0541606
						149.076	4.25944	4.27595	-0.0165102	-0.387613	3.9749	4.57701	3.35061	5.2013	0.00745808	7.3301e-06	323.263	11	0.016145	-0.0694443	0.101734	-0.863031	0.895321	0.00309375	5.66553e-05	0.0688377
						174.076	4.25944	4.40337	-0.143926	-3.37898	4.14227	4.66447	3.49024	5.3165	0.00327993	3.55424e-06	431.971	12	0.0194921	-0.0788485	0.117833	-0.861017	0.900001	0.00361015	5.97523e-05	0.0866132
						199.076	4.25944	4.45893	-0.19949	-4.68347	4.19181	4.72605	3.54407	5.3738	0.00141839	1.59485e-06	542.845	13	0.0233852	-0.0888747	0.135645	-0.858787	0.905557	0.00418627	6.24874e-05	0.108004
						224.076	4.25944	4.48288	-0.223432	-5.24557	4.20294	4.76281	3.56419	5.40157	0.000608983	6.93864e-07	654.66	14	0.0278855	-0.0994602	0.155231	-0.856333	0.912104	0.00482485	6.47958e-05	0.133586
						249.076	4.25944	4.49314	-0.233696	-5.48653	4.20428	4.782	3.57169	5.41459	0.000260665	3.00329e-07	766.878	15	0.0330565	-0.110525	0.176638	-0.853646	0.919759	0.00552818	6.66188e-05	0.163998
						274.076	4.25944	4.49753	-0.238086	-5.58961	4.20369	4.79137	3.57451	5.42055	0.000111427	1.31523e-07	879.269	16	0.038964	-0.121972	0.1999	-0.850713	0.928641	0.00629808	6.7905e-05	0.199945
						299.076	4.25944	4.49941	-0.239962	-5.63365	4.20303	4.79578	3.57558	5.42324	4.76056e-05	5.07453e-08	991.734	17	0.0456753	-0.133686	0.225037	-0.847519	0.938869	0.00713584	6.86098e-05	0.242194
						324.076	4.25944	4.50021	-0.240764	-5.65247	4.20259	4.79783	3.57598	5.42444	2.03339e-05	2.38192e-08	1104.23	18	0.0532586	-0.145536	0.252053	-0.84404	0.950557	0.00804216	6.87001e-05	0.291586
						349.076	4.25944	4.50055	-0.241106	-5.66051	4.20234	4.79876	3.57613	5.42497	8.68436e-06	1.03562e-08	1216.74	19	0.0617825	-0.157375	0.28094	-0.840246	0.963811	0.00901712	6.81512e-05	0.349025
						374.076	6.11167	4.5007	1.61097	26.3589	4.20221	4.79919	3.57619	5.42521	3.70883e-06	3.10685e-09	1329.26	20	0.0713155	-0.169041	0.311672	-0.836097	0.978728	0.0100602	6.69498e-05	0.415487
																		21	0.0819252	-0.180362	0.344212	-0.831541	0.995391	0.0111701	6.50929e-05	0.492015
																		22	0.0936775	-0.191154	0.378509	-0.826515	1.01387	0.0123451	6.25889e-05	0.579718
																		23	0.106636	-0.201224	0.414497	-0.820943	1.03422	0.0135827	5.9457e-05	0.679772
																		24	0.120863	-0.210376	0.452101	-0.814736	1.05646	0.0148796	5.57237e-05	0.793414
X Generated	Y Predicted	Y Observed																25	0.136414	-0.218408	0.491236	-0.807791	1.08062	0.0162322	5.14276e-05	0.921939
0	0.00125231	0																26	0.153344	-0.225119	0.531807	-0.799997	1.10669	0.0176362	4.66138e-05	1.0667
1	0.00164696																	27	0.171702	-0.23031	0.573714	-0.79123	1.13463	0.0190868	4.13337e-05	1.2291
2	0.00214623																	28	0.191532	-0.233787	0.61685	-0.781361	1.16442	0.0205787	3.5647e-05	1.4106
3	0.00277218																	29	0.212871	-0.235362	0.661104	-0.770255	1.196	0.0221062	2.96154e-05	1.61267
4	0.00355015	0																30	0.235754	-0.234857	0.706365	-0.757775	1.22928	0.0236633	2.33042e-05	1.83685
5	0.00450897																	31	0.260206	-0.232108	0.752519	-0.743785	1.2642	0.0252436	1.67819e-05	2.0847
6	0.00568112																	32	0.286247	-0.226962	0.799455	-0.728154	1.30065	0.0268408	1.01176e-05	2.35779
7	0.00710285																	33	0.31389	-0.219284	0.847065	-0.710756	1.33854	0.028448	3.37754e-06	2.65773
8	0.00881425	0																34	0.343144	-0.208954	0.895241	-0.691475	1.37776	0.0300587	-3.37126e-06	2.98611
9	0.0108593																	35	0.374007	-0.195872	0.943885	-0.670209	1.41822	0.0316659	-1.00638e-05	3.34455
10	0.0132857																	36	0.406472	-0.179958	0.992903	-0.646868	1.45981	0.0332631	-1.66401e-05	3.73466
11	0.016145																	37	0.440527	-0.161152	1.04221	-0.621378	1.50243	0.0348437	-2.30429e-05	4.15803
12	0.0194921	0																38	0.476152	-0.139413	1.09172	-0.593682	1.54599	0.0364013	-2.92222e-05	4.61624
13	0.0233852																	39	0.51332	-0.114723	1.14136	-0.563742	1.59038	0.0379296	-3.51294e-05	5.11085
14	0.0278855																	40	0.552	-0.0870835	1.19108	-0.531537	1.63554	0.0394229	-4.07246e-05	5.64338
15	0.0330565																	41	0.592152	-0.0565178	1.24082	-0.497067	1.68137	0.0408754	-4.59695e-05	6.21534
16	0.038964	0																42	0.633735	-0.0230681	1.29054	-0.460347	1.72782	0.0422821	-5.08391e-05	6.82816
17	0.0456753																	43	0.6767	0.0132041	1.3402	-0.421413	1.77481	0.0436379	-5.53042e-05	7.48327
18	0.0532586																	44	0.720992	0.0522187	1.38977	-0.380317	1.8223	0.0449384	-5.93481e-05	8.182
19	0.0617825																	45	0.766557	0.0938789	1.43923	-0.337128	1.87024	0.0461797	-6.29596e-05	8.92568
20	0.0713155	0																46	0.813331	0.138071	1.48859	-0.291929	1.91859	0.047358	-6.61287e-05	9.71552
21	0.0819252																	47	0.861251	0.184669	1.53783	-0.244818	1.96732	0.0484702	-6.88525e-05	10.5527
22	0.0936775																	48	0.910248	0.233531	1.58697	-0.195903	2.0164	0.0495136	-7.11351e-05	11.4384
23	0.106636																	49	0.960254	0.284506	1.636	-0.145305	2.06581	0.0504859	-7.29788e-05	12.3736
24	0.120863	0																50	1.0112	0.33743	1.68496	-0.0931525	2.11554	0.0513853	-7.43959e-05	13.3592
25	0.136414																	51	1.063	0.392135	1.73386	-0.0395811	2.16558	0.0522103	-7.53974e-05	14.3962
26	0.153344																	52	1.11559	0.448443	1.78274	0.0152679	2.21591	0.0529599	-7.60001e-05	15.4855
27	0.171702																	53	1.16889	0.506173	1.83162	0.0712495	2.26654	0.0536336	-7.62217e-05	16.6277
28	0.191532																	54	1.22283	0.565141	1.88053	0.128217	2.31745	0.0542311	-7.60824e-05	17.8235
29	0.212871																	55	1.27733	0.62516	1.9295	0.186023	2.36864	0.0547525	-7.56063e-05	19.0735
30	0.235754																	56	1.33231	0.686045	1.97858	0.244523	2.4201	0.0551984	-7.48107e-05	20.3783
31	0.260206																	57	1.3877	0.747613	2.02779	0.303572	2.47183	0.0555694	-7.37243e-05	21.7383
32	0.286247																	58	1.44343	0.809685	2.07717	0.363032	2.52382	0.0558668	-7.23705e-05	23.1538
33	0.31389																	59	1.49941	0.872087	2.12674	0.422768	2.57606	0.0560918	-7.07762e-05	24.6252
34	0.343144																	60	1.55559	0.934652	2.17652	0.482654	2.62852	0.056246	-6.896e-05	26.1527
35	0.374007																	61	1.61188	0.997223	2.22654	0.542568	2.68119	0.0563313	-6.69534e-05	27.7364
36	0.406472																	62	1.66823	1.05965	2.2768	0.602399	2.73406	0.0563497	-6.47745e-05	29.3765
37	0.440527																	63	1.72456	1.1218	2.32732	0.662041	2.78708	0.0563033	-6.24506e-05	31.0729
38	0.476152																	64	1.78081	1.18354	2.37808	0.7214	2.84023	0.0561945	-6.00039e-05	32.8256
39	0.51332																	65	1.83693	1.24477	2.42909	0.780389	2.89347	0.0560256	-5.74535e-05	34.6345
40	0.552																	66	1.89285	1.30538	2.48031	0.83893	2.94676	0.0557993	-5.48243e-05	36.4994
41	0.592152																	67	1.94851	1.36529	2.53173	0.896954	3.00006	0.0555182	-5.21327e-05	38.4201
42	0.633735																	68	2.00386	1.42443	2.5833	0.954403	3.05333	0.055185	-4.93969e-05	40.3963
43	0.6767																	69	2.05886	1.48274	2.63499	1.01122	3.1065	0.0548024	-4.66302e-05	42.4277
44	0.720992																	70	2.11345	1.54017	2.68674	1.06738	3.15953	0.0543731	-4.38558e-05	44.5139
45	0.766557																	71	2.16759	1.59669	2.7385	1.12282	3.21237	0.0539	-4.10855e-05	46.6544
46	0.813331																	72	2.22124	1.65228	2.7902	1.17753	3.26495	0.0533858	-3.83308e-05	48.8489
47	0.861251																	73	2.27435	1.70693	2.84178	1.23147	3.31723	0.0528333	-3.5604e-05	51.0967
48	0.910248																	74	2.32689	1.76062	2.89316	1.28464	3.36915	0.0522451	-3.2914e-05	53.3974
49	0.960254	1.11111																75	2.37883	1.81338	2.94429	1.33702	3.42064	0.051624	-3.02778e-05	55.7503
50	1.0112																	76	2.43013	1.8652	2.99507	1.38861	3.47166	0.0509727	-2.76945e-05	58.1549
51	1.063																	77	2.48077	1.9161	3.04543	1.43939	3.52215	0.0502937	-2.51785e-05	60.6104
52	1.11559																	78	2.53071	1.9661	3.09532	1.48936	3.57206	0.0495894	-2.27344e-05	63.1162
53	1.16889																	79	2.57994	2.01523	3.14465	1.53854	3.62134	0.0488625	-2.03639e-05	65.6715
54	1.22283																	80	2.62843	2.06351	3.19335	1.58691	3.66995	0.0481151	-1.80762e-05	68.2758
55	1.27733																	81	2.67616	2.11095	3.24138	1.63449	3.71784	0.0473497	-1.58688e-05	70.9282
56	1.33231																	82	2.72312	2.1576	3.28865	1.68128	3.76497	0.0465684	-1.3752e-05	73.6279
57	1.3877																	83	2.7693	2.20346	3.33513	1.72728	3.81131	0.0457734	-1.17242e-05	76.3741
58	1.44343																	84	2.81467	2.24858	3.38075	1.77251	3.85682	0.0449666	-9.78555e-06	79.1662
59	1.49941																	85	2.85923	2.29297	3.42549	1.81698	3.90147	0.04415	-7.93853e-06	82.0032
60	1.55559																	86	2.90296	2.33665	3.46928	1.86069	3.94524	0.0433255	-6.18678e-06	84.8844
61	1.61188																	87	2.94587	2.37964	3.51211	1.90364	3.98811	0.0424947	-4.52461e-06	87.8088
62	1.66823																	88	2.98795	2.42197	3.55393	1.94586	4.03005	0.0416595	-2.95203e-06	90.7758
63	1.72456																	89	3.02919	2.46365	3.59473	1.98734	4.07105	0.0408213	-1.47058e-06	93.7845
64	1.78081																	90	3.06959	2.5047	3.63449	2.02809	4.1111	0.0399816	-7.71535e-08	96.8339
65	1.83693																	91	3.10916	2.54513	3.67318	2.06812	4.15019	0.0391418	1.22928e-06	99.9234
66	1.89285																	92	3.14788	2.58496	3.7108	2.10744	4.18831	0.0383033	2.45182e-06	103.052
67	1.94851																	93	3.18576	2.62419	3.74734	2.14605	4.22547	0.0374672	3.58945e-06	106.219
68	2.00386																	94	3.22281	2.66283	3.78279	2.18397	4.26166	0.0366346	4.64889e-06	109.423
69	2.05886																	95	3.25903	2.7009	3.81716	2.22118	4.29688	0.0358068	5.63065e-06	112.664
70	2.11345																	96	3.29443	2.73841	3.85045	2.25771	4.33115	0.0349845	6.53837e-06	115.941
71	2.16759																	97	3.32901	2.77535	3.88266	2.29355	4.36446	0.0341688	7.36894e-06	119.253
72	2.22124																	98	3.36277	2.81173	3.91381	2.32872	4.39682	0.0333604	8.13167e-06	122.599
73	2.27435																	99	3.39573	2.84756	3.94389	2.3632	4.42825	0.0325602	8.83071e-06	125.978
74	2.32689	2.22222																100	3.42789	2.88285	3.97294	2.39702	4.45877	0.0317688	9.46451e-06	129.39
75	2.37883																	101	3.45927	2.91758	4.00095	2.43017	4.48837	0.0309868	1.00382e-05	132.834
76	2.43013																	102	3.48987	2.95178	4.02796	2.46266	4.51708	0.0302149	1.05514e-05	136.308
77	2.48077																	103	3.5197	2.98543	4.05397	2.49449	4.54492	0.0294535	1.10133e-05	139.813
78	2.53071																	104	3.54878	3.01855	4.07901	2.52566	4.5719	0.0287032	1.14203e-05	143.347
79	2.57994																	105	3.57711	3.05112	4.10311	2.55618	4.59804	0.0279642	1.17791e-05	146.91
80	2.62843																	106	3.60471	3.08316	4.12627	2.58606	4.62336	0.027237	1.20882e-05	150.501
81	2.67616																	107	3.63159	3.11466	4.14852	2.6153	4.64788	0.026522	1.23591e-05	154.12
82	2.72312																	108	3.65776	3.14562	4.1699	2.6439	4.67162	0.0258192	1.25869e-05	157.764
83	2.7693																	109	3.68323	3.17605	4.19042	2.67187	4.6946	0.0251291	1.27707e-05	161.435
84	2.81467																	110	3.70802	3.20594	4.2101	2.69921	4.71684	0.0244517	1.2924e-05	165.131
85	2.85923																	111	3.73214	3.2353	4.22898	2.72592	4.73836	0.0237873	1.30384e-05	168.851
86	2.90296																	112	3.7556	3.26413	4.24707	2.75202	4.75918	0.0231358	1.31233e-05	172.595
87	2.94587																	113	3.77842	3.29242	4.26441	2.77751	4.77933	0.0224975	1.31788e-05	176.362
88	2.98795																	114	3.8006	3.32018	4.28102	2.80239	4.79881	0.0218724	1.32046e-05	180.151
89	3.02919																	115	3.82217	3.34741	4.29692	2.82667	4.81767	0.0212605	1.32083e-05	183.963
90	3.06959																	116	3.84313	3.37411	4.31215	2.85035	4.8359	0.0206618	1.31876e-05	187.795
91	3.10916																	117	3.86349	3.40027	4.32672	2.87344	4.85354	0.0200763	1.31461e-05	191.649
92	3.14788																	118	3.88328	3.42591	4.34066	2.89596	4.87061	0.0195039	1.30793e-05	195.522
93	3.18576																	119	3.90251	3.45102	4.35399	2.91789	4.88712	0.0189446	1.29996e-05	199.415
94	3.22281																	120	3.92118	3.47561	4.36674	2.93926	4.90309	0.0183983	1.28997e-05	203.327
95	3.25903																	121	3.93931	3.49967	4.37894	2.96007	4.91854	0.0178649	1.27868e-05	207.257
96	3.29443																	122	3.95691	3.52321	4.39061	2.98033	4.9335	0.0173443	1.26594e-05	211.205
97	3.32901																	123	3.974	3.54623	4.40177	3.00003	4.94797	0.0168363	1.25196e-05	215.171
98	3.36277																	124	3.99059	3.56874	4.41244	3.01921	4.96197	0.0163409	1.2372e-05	219.153
99	3.39573	3.33333																125	4.00669	3.59073	4.42265	3.03785	4.97552	0.0158578	1.22068e-05	223.152
100	3.42789																	126	4.02231	3.6122	4.43241	3.05597	4.98865	0.0153869	1.20349e-05	227.166
101	3.45927																	127	4.03746	3.63317	4.44176	3.07358	5.00135	0.0149281	1.18599e-05	231.196
102	3.48987																	128	4.05217	3.65363	4.4507	3.09068	5.01365	0.0144812	1.16756e-05	235.241
103	3.5197																	129	4.06643	3.67359	4.45927	3.10729	5.02557	0.0140459	1.14829e-05	239.301
104	3.54878																	130	4.08026	3.69305	4.46748	3.12341	5.03711	0.0136221	1.12872e-05	243.374
105	3.57711																	131	4.09368	3.71202	4.47534	3.13906	5.04829	0.0132095	1.10842e-05	247.461
106	3.60471																	132	4.10669	3.73049	4.48288	3.15424	5.05913	0.0128081	1.08823e-05	251.561
107	3.63159																	133	4.1193	3.74847	4.49012	3.16896	5.06963	0.0124176	1.06751e-05	255.674
108	3.65776																	134	4.13152	3.76598	4.49707	3.18324	5.07981	0.0120377	1.04628e-05	259.8
109	3.68323																	135	4.14338	3.783	4.50375	3.19707	5.08968	0.0116683	1.02536e-05	263.937
110	3.70802																	136	4.15486	3.79955	4.51018	3.21048	5.09925	0.0113091	1.00362e-05	268.086
111	3.73214																	137	4.166	3.81563	4.51636	3.22346	5.10854	0.01096	9.82697e-06	272.247
112	3.7556																	138	4.17679	3.83125	4.52232	3.23603	5.11754	0.0106207	9.61778e-06	276.418
113	3.77842																	139	4.18724	3.84641	4.52807	3.24821	5.12628	0.010291	9.39926e-06	280.6
114	3.8006																	140	4.19737	3.86112	4.53363	3.25999	5.13476	0.00997071	9.188e-06	284.793
115	3.82217																	141	4.20719	3.87538	4.539	3.27139	5.14299	0.00965962	8.96948e-06	288.995
116	3.84313																	142	4.2167	3.88919	4.5442	3.28241	5.15098	0.0093575	8.76547e-06	293.207
117	3.86349																	143	4.22591	3.90257	4.54924	3.29308	5.15873	0.00906414	8.55627e-06	297.428
118	3.88328																	144	4.23483	3.91553	4.55413	3.30339	5.16626	0.00877934	8.35226e-06	301.659
119	3.90251																	145	4.24347	3.92806	4.55888	3.31335	5.17358	0.00850289	8.1441e-06	305.898
120	3.92118																	146	4.25183	3.94017	4.5635	3.32299	5.18068	0.00823458	7.93904e-06	310.145
121	3.93931																	147	4.25994	3.95187	4.56801	3.33229	5.18759	0.00797421	7.7371e-06	314.401
122	3.95691																	148	4.26779	3.96317	4.5724	3.34128	5.19429	0.00772158	7.5424e-06	318.665
123	3.974																	149	4.27538	3.97408	4.57669	3.34996	5.20081	0.0074765	7.34564e-06	322.937
124	3.99059	4.25944																150	4.28274	3.9846	4.58089	3.35834	5.20714	0.00723876	7.15612e-06	327.216
125	4.00669																	151	4.28986	3.99474	4.58499	3.36643	5.2133	0.00700818	6.9666e-06	331.502
126	4.02231																	152	4.29676	4.0045	4.58902	3.37424	5.21928	0.00678457	6.78537e-06	335.796
127	4.03746																	153	4.30344	4.0139	4.59297	3.38178	5.22509	0.00656774	6.59999e-06	340.096
128	4.05217																	154	4.3099	4.02295	4.59685	3.38905	5.23075	0.00635751	6.42083e-06	344.402
129	4.06643																	155	4.31615	4.03164	4.60066	3.39606	5.23625	0.0061537	6.24167e-06	348.715
130	4.08026																	156	4.32221	4.04	4.60442	3.40282	5.24159	0.00595613	6.07183e-06	353.035
131	4.09368																	157	4.32807	4.04802	4.60811	3.40934	5.24679	0.00576464	5.89991e-06	357.36
132	4.10669																	158	4.33374	4.05572	4.61175	3.41563	5.25184	0.00557905	5.74146e-06	361.691
133	4.1193																	159	4.33923	4.06311	4.61535	3.42169	5.25676	0.0053992	5.57369e-06	366.027
134	4.13152																	160	4.34454	4.07019	4.61889	3.42754	5.26154	0.00522493	5.42249e-06	370.369
135	4.14338																	161	4.34968	4.07697	4.62239	3.43317	5.26619	0.00505607	5.26508e-06	374.716
136	4.15486																	162	4.35465	4.08346	4.62584	3.43859	5.27071	0.00489248	5.11077e-06	379.068
137	4.166																	163	4.35947	4.08968	4.62925	3.44382	5.27511	0.004734	4.96371e-06	383.425
138	4.17679																	164	4.36412	4.09562	4.63262	3.44885	5.27939	0.00458048	4.81873e-06	387.787
139	4.18724																	165	4.36863	4.1013	4.63596	3.4537	5.28355	0.00443178	4.68306e-06	392.154
140	4.19737																	166	4.37299	4.10673	4.63925	3.45837	5.2876	0.00428777	4.54118e-06	396.524
141	4.20719																	167	4.3772	4.11191	4.6425	3.46287	5.29154	0.00414829	4.40862e-06	400.899
142	4.2167																	168	4.38129	4.11685	4.64572	3.4672	5.29537	0.00401322	4.27296e-06	405.279
143	4.22591																	169	4.38523	4.12156	4.6489	3.47137	5.2991	0.00388243	4.15283e-06	409.662
144	4.23483																	170	4.38905	4.12606	4.65205	3.47538	5.30272	0.00375579	4.02545e-06	414.049
145	4.24347																	171	4.39275	4.13034	4.65515	3.47925	5.30625	0.00363317	3.90117e-06	418.44
146	4.25183																	172	4.39632	4.13442	4.65822	3.48296	5.30967	0.00351446	3.78932e-06	422.835
147	4.25994																	173	4.39978	4.1383	4.66125	3.48654	5.31301	0.00339953	3.67126e-06	427.233
148	4.26779																	174	4.40312	4.14199	4.66425	3.48999	5.31625	0.00328828	3.55838e-06	431.634
149	4.27538	4.25944																175	4.40635	4.1455	4.6672	3.4933	5.31941	0.00318058	3.44964e-06	436.039
150	4.28274																	176	4.40948	4.14884	4.67012	3.49649	5.32248	0.00307634	3.35022e-06	440.447
151	4.28986																	177	4.41251	4.15201	4.673	3.49956	5.32546	0.00297544	3.24563e-06	444.858
152	4.29676																	178	4.41543	4.15503	4.67584	3.50251	5.32836	0.00287779	3.14103e-06	449.272
153	4.30344																	179	4.41826	4.15789	4.67864	3.50534	5.33118	0.00278328	3.04575e-06	453.689
154	4.3099																	180	4.421	4.1606	4.6814	3.50808	5.33393	0.00269181	2.95255e-06	458.108
155	4.31615																	181	4.42365	4.16318	4.68412	3.5107	5.33659	0.0026033	2.86038e-06	462.531
156	4.32221																	182	4.42621	4.16562	4.6868	3.51323	5.33919	0.00251765	2.76717e-06	466.956
157	4.32807																	183	4.42868	4.16793	4.68944	3.51566	5.34171	0.00243477	2.68536e-06	471.383
158	4.33374																	184	4.43108	4.17012	4.69204	3.51799	5.34416	0.00235457	2.5994e-06	475.813
159	4.33923																	185	4.43339	4.1722	4.69459	3.52024	5.34655	0.00227697	2.51862e-06	480.245
160	4.34454																	186	4.43563	4.17416	4.6971	3.5224	5.34887	0.00220189	2.43991e-06	484.68
161	4.34968																	187	4.4378	4.17602	4.69957	3.52448	5.35112	0.00212925	2.36017e-06	489.116
162	4.35465																	188	4.43989	4.17778	4.702	3.52648	5.35331	0.00205898	2.2825e-06	493.555
163	4.35947																	189	4.44192	4.17945	4.70439	3.5284	5.35544	0.00199099	2.21208e-06	497.996
164	4.36412																	190	4.44388	4.18102	4.70673	3.53025	5.35751	0.00192522	2.14891e-06	502.439
165	4.36863																	191	4.44577	4.18251	4.70903	3.53202	5.35952	0.00186159	2.07641e-06	506.884
166	4.37299																	192	4.4476	4.18391	4.71129	3.53373	5.36147	0.00180004	2.0091e-06	511.331
167	4.3772																	193	4.44937	4.18524	4.7135	3.53537	5.36337	0.0017405	1.94593e-06	515.779
168	4.38129																	194	4.45108	4.18649	4.71568	3.53695	5.36521	0.00168291	1.88275e-06	520.229
169	4.38523																	195	4.45274	4.18767	4.71781	3.53847	5.36701	0.0016272	1.82476e-06	524.681
170	4.38905																	196	4.45434	4.18878	4.7199	3.53993	5.36875	0.00157332	1.76262e-06	529.135
171	4.39275																	197	4.45588	4.18983	4.72194	3.54133	5.37044	0.0015212	1.71188e-06	533.59
172	4.39632																	198	4.45738	4.19081	4.72394	3.54268	5.37208	0.0014708	1.65388e-06	538.047
173	4.39978																	199	4.45883	4.19175	4.72591	3.54397	5.37368	0.00142204	1.59589e-06	542.505
174	4.40312	4.25944																200	4.46022	4.19262	4.72783	3.54522	5.37523	0.00137489	1.54721e-06	546.964
175	4.40635																	201	4.46158	4.19344	4.72971	3.54642	5.37674	0.00132929	1.49854e-06	551.425
176	4.40948																	202	4.46288	4.19422	4.73155	3.54757	5.3782	0.00128519	1.44883e-06	555.887
177	4.41251																	203	4.46415	4.19495	4.73335	3.54867	5.37962	0.00124254	1.40844e-06	560.351
178	4.41543																	204	4.46537	4.19563	4.73511	3.54974	5.381	0.00120129	1.35873e-06	564.816
179	4.41826																	205	4.46655	4.19628	4.73683	3.55076	5.38234	0.0011614	1.31316e-06	569.282
180	4.421																	206	4.46769	4.19688	4.73851	3.55174	5.38364	0.00112282	1.27174e-06	573.749
181	4.42365																	207	4.4688	4.19744	4.74015	3.55269	5.38491	0.00108552	1.22824e-06	578.217
182	4.42621																	208	4.46986	4.19797	4.74175	3.55359	5.38613	0.00104945	1.19096e-06	582.686
183	4.42868																	209	4.4709	4.19847	4.74332	3.55447	5.38732	0.00101457	1.15057e-06	587.157
184	4.43108																	210	4.47189	4.19893	4.74485	3.55531	5.38848	0.000980838	1.11329e-06	591.628
185	4.43339																	211	4.47286	4.19937	4.74635	3.55611	5.3896	0.000948223	1.07911e-06	596.1
186	4.43563																	212	4.47379	4.19978	4.7478	3.55689	5.39069	0.000916685	1.03976e-06	600.574
187	4.4378																	213	4.47469	4.20015	4.74923	3.55763	5.39175	0.000886191	1.00973e-06	605.048
188	4.43989																	214	4.47556	4.20051	4.75062	3.55835	5.39278	0.000856705	9.75552e-07	609.523
189	4.44192																	215	4.4764	4.20084	4.75197	3.55904	5.39377	0.000828194	9.42412e-07	613.999
190	4.44388																	216	4.47722	4.20115	4.75329	3.5597	5.39474	0.000800628	9.16521e-07	618.476
191	4.44577																	217	4.47801	4.20143	4.75458	3.56034	5.39568	0.000773974	8.80275e-07	622.953
192	4.4476																	218	4.47877	4.2017	4.75584	3.56095	5.39659	0.000748203	8.54384e-07	627.432
193	4.44937																	219	4.4795	4.20194	4.75706	3.56154	5.39747	0.000723286	8.25387e-07	631.911
194	4.45108																	220	4.48021	4.20217	4.75826	3.5621	5.39833	0.000699195	7.99497e-07	636.391
195	4.45274																	221	4.4809	4.20238	4.75942	3.56264	5.39916	0.000675903	7.70499e-07	640.871
196	4.45434																	222	4.48157	4.20258	4.76055	3.56317	5.39997	0.000653384	7.49787e-07	645.353
197	4.45588																	223	4.48221	4.20276	4.76166	3.56367	5.40075	0.000631612	7.21825e-07	649.835
198	4.45738																	224	4.48283	4.20293	4.76273	3.56415	5.40151	0.000610562	7.01113e-07	654.317
199	4.45883	4.25944																225	4.48343	4.20308	4.76378	3.56462	5.40225	0.000590211	6.75223e-07	658.8
200	4.46022																	226	4.48401	4.20322	4.7648	3.56506	5.40296	0.000570536	6.52439e-07	663.284
201	4.46158																	227	4.48457	4.20335	4.76579	3.56549	5.40365	0.000551514	6.31727e-07	667.768
202	4.46288																	228	4.48511	4.20347	4.76676	3.5659	5.40433	0.000533124	6.13086e-07	672.253
203	4.46415																	229	4.48564	4.20357	4.7677	3.5663	5.40498	0.000515346	5.93409e-07	676.738
204	4.46537																	230	4.48614	4.20367	4.76862	3.56668	5.40561	0.000498158	5.67518e-07	681.224
205	4.46655																	231	4.48663	4.20376	4.76951	3.56705	5.40622	0.000481542	5.48877e-07	685.711
206	4.46769																	232	4.48711	4.20384	4.77038	3.5674	5.40682	0.000465478	5.32307e-07	690.198
207	4.4688																	233	4.48757	4.20391	4.77122	3.56774	5.40739	0.000449948	5.17809e-07	694.685
[truncated: 293 more rows]

## Sheet: Gompertz 7
T7
[truncated: 528 more rows]

[truncated: 2 more sheets: Gompertz 8, Gompertz 9]
